# Supplementary material for: Virus-like particles displaying conserved toxin epitopes stimulate polyspecific, murine antibody responses capable of snake venom recognition
Source: Sci Rep. 2022 Jul 5;12:11328. doi: 10.1038/s41598-022-13376-x (PMC9256628; doi:10.1038/s41598-022-13376-x)
Supplement: Supplementary file 4 — Supplementary Information 4. [file 41598_2022_13376_MOESM4_ESM.xlsx]

## Sheet: Contents
Click hyperlink to navigate to sheet		Contents
		Immunogen information
		Group A	Individual animals, terminal bleed
		Group B
		Group C
		Group D
		Group E
		Group F
		Group G
		Group H
		Group I
		Group J
		Group K
		Group L
		Group M
		Group A & Group M	Pooled samples, time course
		Group B & Group C
		Group D & Group E
		Group F & Group G
		Group H & Group I
		Group J & Group K
		Group L & Group 4IJ

## Sheet: Immunogen info
Epitope	Type	Mouse group	Adjuvant
CTX_C	Cytotoxic 3FTx	3A	Yes
CTX_F	Cytotoxic 3FTx	3B	Yes
ATX_C	Aminergic-type 3FTx	3C	Yes
ATX_F	Aminergic-type 3FTx	3D	Yes
sNTX_C	Short Type I α 3FTx	3E	Yes
sNTX_F1	Short Type I α 3FTx	3F	Yes
sNTX_F2	Short Type I α 3FTx	3G	Yes
PLA2_1	Group I PLA2	3H	Yes
PLA2_2	Group I PLA2	3I	Yes
PLA2_3	Group I PLA2	3J	Yes
Core string	3FTx string core epitopes	3K	Yes
Finger string	3FTx string finger epitopes	3L	Yes
CTX_C	Cytotoxic 3FTx	3M	No
None	Control VLP (no epitope)	4IJ	Yes

## Sheet: Terminal A, B & M
<>	1	2	3	4	5	6	7	8	9	10	11	12			1	2	3	4	5	6	7	8	9	10	11	12
A	0.4696	0.3421	0.3415	0.3091	0.6977	0.4358	0.3624	0.3389	0.6927	0.4255	0.3416	0.2909	A4	A	NAÏVE 1 IN 100	NAÏVE 1 IN 500	NAÏVE 1 IN 2500	NAÏVE 1 IN 12500	A4 1 IN 100	A4 1 IN 500	A4 1 IN 2500	A4 1 IN 12500	A4 1 IN 100	A4 1 IN 500	A4 1 IN 2500	A4 1 IN 12500		Protein coated
B	0.478	0.4072	0.3568	0.3348	1.1033	0.6239	0.5221	0.3901	0.7654	0.486	0.3756	0.2763		B														VLP-CTX_C
C	0.513	0.3721	0.3916	0.3436	1.2136	1.0381	0.5945	0.3796	0.8068	0.4796	0.3323	0.3211		C														nativeVLP
D	0.2361	0.2859	0.3196	0.338	0.3945	0.342	0.3217	0.3611	0.3767	0.3886	0.3765	0.2194		D	2Y ONLY				A4 IN 100	A4 1 IN 500	A4 1 IN 2500	A4 1 IN 12500	2Y ONLY					Text indicates sera added
E	0.3636	0.3742	0.4476	0.2979	1.1802	0.8076	0.4894	0.3883	0.4751	0.3651	0.288	0.2249	A5	E	NAÏVE 1 IN 100	NAÏVE 1 IN 500	NAÏVE 1 IN 2500	NAÏVE 1 IN 12500	A5 1 IN 100	A5 1 IN 500	A5 1 IN 2500	A5 1 IN 12500	A5 1 IN 100	A5 1 IN 500	A5 1 IN 2500	A5 1 IN 12500		Coating buffer only
F	0.3189	0.343	0.2927	0.5001	0.8385	0.7406	0.5028	0.3916	0.5556	0.4212	0.3653	0.2532		F
G	0.341	0.3297	0.3933	0.3553	0.548	0.4653	0.3686	0.374	0.4914	0.3605	0.3177	0.2589		G
H	0.2811	0.2871	0.3434	0.2937	0.3572	0.3237	0.3279	0.3459	0.2994	0.3611	0.2963	0.2243		H	2Y ONLY				A5 IN 100	A5 1 IN 500	A5 1 IN 2500	A5 1 IN 12500	2Y ONLY
<>	1	2	3	4	5	6	7	8	9	10	11	12			1	2	3	4	5	6	7	8	9	10	11	12		Protein coated
A	0.4627	0.3158	0.2662	0.2374	0.592	0.4175	0.3729	0.2783	0.6266	0.4378	0.2793	0.2284	B5	A	NAÏVE 1 IN 100	NAÏVE 1 IN 500	NAÏVE 1 IN 2500	NAÏVE 1 IN 12500	B5 1 IN 100	B5 1 IN 500	B5 1 IN 2500	B5 1 IN 12500	B5 1 IN 100	B5 1 IN 500	B5 1 IN 2500	B5 1 IN 12500		VLP-CTX_F
B	0.3805	0.3653	0.3007	0.3364	0.6393	0.4358	0.3321	0.2552	0.6163	0.4422	0.3349	0.2092		B														nativeVLP
C	0.407	0.4379	0.3579	0.3187	0.6148	0.376	0.3308	0.2701	0.5912	0.39	0.2728	0.2075		C														Text indicates sera added
D	0.1857	0.3636	0.3692	0.2872	0.6723	0.3923	0.3226	0.2695	0.2706	0.3245	0.2628	0.2404		D	2Y ONLY				B5 IN 100	B5 1 IN 500	B5 1 IN 2500	B5 1 IN 12500	2Y ONLY					Coating buffer only
<>	1	2	3	4	5	6	7	8	9	10	11	12			1	2	3	4	5	6	7	8	9	10	11	12		Protein coated
E	0.3605	0.2062	0.1712	0.1594	1.4884	0.9822	0.5201	0.2647	1.6836	1.054	0.5751	0.2932	M1	E	NAÏVE 1 IN 100	NAÏVE 1 IN 500	NAÏVE 1 IN 2500	NAÏVE 1 IN 12500	M1 1 IN 100	M1 1 IN 500	M1 1 IN 2500	M1 1 IN 12500	M1 1 IN 100	M1 1 IN 500	M1 1 IN 2500	M1 1 IN 12500		VLP-CTX_C
F	0.3557	0.2176	0.1829	0.1688	1.5458	1.0072	0.534	0.2652	1.6876	1.0669	0.5379	0.2749		F														nativeVLP
G	0.3704	0.2167	0.1915	0.1688	1.5178	1.0682	0.539	0.2627	1.6783	1.0602	0.5285	0.2858		G														Text indicates sera added
H	0.1798	0.1761	0.1747	0.1738	0.1883	0.1716	0.1613	0.1675	0.1557	0.1608	0.1685	0.1707		H	2Y ONLY				M1 1 IN 100	M1 1 IN 500	M1 1 IN 2500	M1 1 IN 12500	2Y ONLY					Coating buffer only
<>	1	2	3	4	5	6	7	8	9	10	11	12			1	2	3	4	5	6	7	8	9	10	11	12		Protein coated
A	0.3684	0.2166	0.1786	0.1576	0.2759	0.2026	0.1691	0.1632	0.2469	0.1641	0.1728	0.4444	M2	A	NAÏVE 1 IN 100	NAÏVE 1 IN 500	NAÏVE 1 IN 2500	NAÏVE 1 IN 12500	M2 1 IN 100	M2 1 IN 500	M2 1 IN 2500	M2 1 IN 12500	M2 1 IN 100	M2 1 IN 500	M2 1 IN 2500	M2 1 IN 12500		VLP-CTX_C
B	0.3678	0.2047	0.1756	0.1663	0.2811	0.2048	0.1691	0.1522	0.2468	0.1624	0.1644	0.2288		B														nativeVLP
C	0.3522	0.2107	0.1783	0.1653	0.2898	0.2156	0.1759	0.1614	0.2578	0.1583	0.1554	0.1572		C														Text indicates sera added
D	0.1464	0.1507	0.1496	0.1558	0.1867	0.1588	0.1532	0.1477	0.1486	0.1438	0.1558	0.1522		D	2Y ONLY				M2 1 IN 100	M2 1 IN 500	M2 1 IN 2500	M2 1 IN 12500	2Y ONLY					Coating buffer only
E	0.3629	0.2043	0.1711	0.1592	0.7747	0.5908	0.3816	0.2306	0.4796	0.3161	0.2583	0.188	M3	E	NAÏVE 1 IN 100	NAÏVE 1 IN 500	NAÏVE 1 IN 2500	NAÏVE 1 IN 12500	M3 1 IN 100	M3 1 IN 500	M3 1 IN 2500	M3 1 IN 12500	M3 1 IN 100	M3 1 IN 500	M3 1 IN 2500	M3 1 IN 12500
F	0.3599	0.2025	0.1735	0.1616	0.7906	0.6016	0.36	0.2283	0.4562	0.3426	0.2617	0.1916		F
G	0.3673	0.2177	0.2018	0.1722	0.7809	0.5999	0.4	0.2312	0.4393	0.3168	0.2579	0.1914		G
H	0.1608	0.1477	0.1491	0.1467	0.2211	0.1805	0.1503	0.1551	0.1541	0.1489	0.1522	0.1582		H	2Y ONLY				M3 1 IN 100	M3 1 IN 500	M3 1 IN 2500	M3 1 IN 12500	2Y ONLY
<>	1	2	3	4	5	6	7	8	9	10	11	12			1	2	3	4	5	6	7	8	9	10	11	12		Protein coated
A	0.3285	0.2035	0.1771	0.1688	0.2441	0.2431	0.2454	0.1815	0.206	0.1748	0.1601	0.1647	M5	E	NAÏVE 1 IN 100	NAÏVE 1 IN 500	NAÏVE 1 IN 2500	NAÏVE 1 IN 12500	M5 1 IN 100	M5 1 IN 500	M5 1 IN 2500	M5 1 IN 12500	M5 1 IN 100	M5 1 IN 500	M5 1 IN 2500	M5 1 IN 12500		VLP-CTX_C
B	0.328	0.2098	0.1873	0.1893	0.2789	0.2314	0.1988	0.2123	0.2171	0.1852	0.1614	0.1608		F														nativeVLP
C	0.3425	0.2133	0.1918	0.1866	0.2699	0.2462	0.2094	0.1742	0.2055	0.2056	0.1606	0.1606		G														Text indicates sera added
D	0.1544	0.1668	0.2468	0.2289	0.2316	0.2246	0.186	0.2034	0.1867	0.1973	0.1634	0.156		H	2Y ONLY				M5 1 IN 100	M5 1 IN 500	M5 1 IN 2500	M5 1 IN 12500	2Y ONLY					Coating buffer only

## Sheet: Terminal C & D
	1	2	3	4	5	6	7	8	9	10	11	12			1	2	3	4	5	6	7	8	9	10	11	12		Protein coated
E	0.3014	0.4125	0.297	0.2827	1.9625	1.982	1.7393	1.1712	1.889	1.899	1.5122	0.7702	C1	E	NAÏVE 1 IN 100	NAÏVE 1 IN 500	NAÏVE 1 IN 2500	NAÏVE 1 IN 12500	C1 1 IN 100	C1 1 IN 500	C1 1 IN 2500	C1 1 IN 12500	C1 1 IN 100	C1 1 IN 500	C1 1 IN 2500	C1 1 IN 12500		VLP-ATX_C
F	0.3065	0.3417	0.259	0.3305	1.9455	1.9441	1.7371	1.1914	1.9448	1.9685	1.6494	0.7084		F														nativeVLP
G	0.2942	0.2947	0.2824	0.3154	1.9478	1.9333	1.7959	1.1745	1.9804	1.8878	1.6004	0.7531		G														Text indicates sera added
H	0.1931	0.2366	0.236	0.3076	0.3118	0.245	0.3107	0.2698	0.3092	0.386	0.2716	0.2424		H	2Y ONLY				C1 1 IN 100	C1 1 IN 500	C1 1 IN 2500	C1 1 IN 12500	2Y ONLY					Coating buffer only
<>	1	2	3	4	5	6	7	8	9	10	11	12			1	2	3	4	5	6	7	8	9	10	11	12
A	0.3732	0.3998	0.2739	0.219	2.0531	1.9204	1.5957	1.051	1.9772	1.592	1.1073	0.4437	C2	A	NAÏVE 1 IN 100	NAÏVE 1 IN 500	NAÏVE 1 IN 2500	NAÏVE 1 IN 12500	C2 1 IN 100	C2 1 IN 500	C2 1 IN 2500	C2 1 IN 12500	C2 1 IN 100	C2 1 IN 500	C2 1 IN 2500	C2 1 IN 12500		Protein coated
B	0.2672	0.2985	0.2788	0.2683	2.0405	1.9318	1.5894	0.9931	1.9881	1.6223	1.1397	0.4115		B														VLP-ATX_C
C	0.2877	0.336	0.3031	0.2384	2.0251	1.9335	1.6237	1.0428	1.9668	1.661	0.9148	0.4737		C														nativeVLP
D	0.1666	0.2428	0.3141	0.2797	0.3667	0.3686	0.3312	0.2877	0.2392	0.2578	0.2357	0.1801		D	2Y ONLY				A4 IN 100	A4 1 IN 500	A4 1 IN 2500	A4 1 IN 12500	2Y ONLY					Text indicates sera added
E	0.2905	0.4116	0.3176	0.3211	2.0481	1.9593	1.733	1.2361	1.9682	1.9457	1.6172	0.7172	C3	E	NAÏVE 1 IN 100	NAÏVE 1 IN 500	NAÏVE 1 IN 2500	NAÏVE 1 IN 12500	C3 1 IN 100	C3 1 IN 500	C3 1 IN 2500	C3 1 IN 12500	C3 1 IN 100	C3 1 IN 500	C3 1 IN 2500	C3 1 IN 12500		Coating buffer only
F	0.2857	0.3544	0.5113	0.605	2.0596	1.9947	1.7258	1.2513	2.0605	1.9136	1.6887	0.8724		F
G	0.304	0.6158	0.6441	0.3325	1.9915	1.9985	1.6805	1.2375	1.9793	1.9176	1.5336	0.7173		G
H	0.1883	0.2113	0.3094	0.2935	0.3839	0.4083	0.2548	0.2658	0.3052	0.3852	0.2763	0.2114		H	2Y ONLY				C3 IN 100	C3 1 IN 500	C3 1 IN 2500	C3 1 IN 12500	2Y ONLY
<>	1	2	3	4	5	6	7	8	9	10	11	12			1	2	3	4	5	6	7	8	9	10	11	12
A	0.3296	0.4432	0.2734	0.29	2.0079	1.8586	1.3665	0.7341	1.8241	1.3197	0.6281	0.3035	C5	A	NAÏVE 1 IN 100	NAÏVE 1 IN 500	NAÏVE 1 IN 2500	NAÏVE 1 IN 12500	C5 1 IN 100	C5 1 IN 500	C5 1 IN 2500	C5 1 IN 12500	C5 1 IN 100	C5 1 IN 500	C5 1 IN 2500	C5 1 IN 12500		Protein coated
B	0.2817	0.2615	0.3134	0.2453	1.9386	1.8192	1.2836	0.6597	1.8165	1.2921	0.698	0.2852		B														VLP-ATX_C
C	0.2877	0.2731	0.2563	0.2411	1.9707	1.8012	1.2305	0.6455	1.8083	1.2691	0.6787	0.2825		C														nativeVLP
D	0.1923	0.2753	0.2952	0.2672	0.2986	0.3546	0.3291	0.2544	0.2323	0.2233	0.2336	0.1957		D	2Y ONLY				C5 IN 100	C5 1 IN 500	C5 1 IN 2500	C5 1 IN 12500	2Y ONLY					Text indicates sera added
E	0.3067	0.4425	0.475	0.4642	2.1156	1.9241	1.0373	0.4416	1.9497	1.6895	1.0073	0.4188	D1	E	NAÏVE 1 IN 100	NAÏVE 1 IN 500	NAÏVE 1 IN 2500	NAÏVE 1 IN 12500	D1 1 IN 100	D1 1 IN 500	D1 1 IN 2500	D1 1 IN 12500	D1 1 IN 100	D1 1 IN 500	D1 1 IN 2500	D1 1 IN 12500		Coating buffer only
F	0.2905	0.364	0.246	0.2921	2.1112	1.8313	0.9891	0.5007	2.0386	1.7222	0.9991	0.4247		F														VLP-ATX_F
G	0.3023	0.3489	0.381	0.363	2.0526	1.8627	1.0247	0.4922	2.0109	1.7825	1.1105	0.5098		G
H	0.1976	0.2736	0.2934	0.2889	0.4177	0.3204	0.3253	0.3155	0.3462	0.2979	0.3218	0.2129		H	2Y ONLY				D1 IN 100	D1 1 IN 500	D1 1 IN 2500	D1 1 IN 12500	2Y ONLY
<>	1	2	3	4	5	6	7	8	9	10	11	12			1	2	3	4	5	6	7	8	9	10	11	12
A	0.4031	0.3437	0.3323	0.3515	1.9335	1.6348	1.0536	0.6331	1.8819	1.2639	0.6431	0.3489	D3	A	NAÏVE 1 IN 100	NAÏVE 1 IN 500	NAÏVE 1 IN 2500	NAÏVE 1 IN 12500	D3 1 IN 100	D3 1 IN 500	D3 1 IN 2500	D3 1 IN 12500	D3 1 IN 100	D3 1 IN 500	D3 1 IN 2500	D3 1 IN 12500		Protein coated
B	0.3242	0.3092	0.3106	0.377	1.9379	1.6708	1.0349	0.5817	1.8788	1.3415	0.7673	0.3296		B														VLP-CTX_C
C	0.2938	0.3423	0.3861	0.3697	1.9198	1.5739	1.0495	0.5934	1.8493	1.268	0.6926	0.3745		C														nativeVLP
D	0.2429	0.3094	0.3534	0.3287	0.4416	0.4213	0.359	0.3658	0.3672	0.4207	0.3804	0.2967		D	2Y ONLY				D3 IN 100	D3 1 IN 500	D3 1 IN 2500	D3 1 IN 12500	2Y ONLY					Text indicates sera added
E	0.336	0.4103	0.3417	0.3072	1.995	1.9966	1.692	1.3683	1.9841	1.6113	1.0336	0.6183	D5	E	NAÏVE 1 IN 100	NAÏVE 1 IN 500	NAÏVE 1 IN 2500	NAÏVE 1 IN 12500	D5 1 IN 100	D5 1 IN 500	D5 1 IN 2500	D5 1 IN 12500	D5 1 IN 100	D5 1 IN 500	D5 1 IN 2500	D5 1 IN 12500		Coating buffer only
F	0.3053	0.3001	0.3336	0.3622	2.0113	2.0121	1.7248	1.1734	2.1037	1.8088	1.0887	0.5866		F														VLP-ATX_F
G	0.3142	0.4339	0.446	0.3763	1.9933	1.9735	1.7568	1.2614	1.8501	1.5518	1.0521	0.6048		G
H	0.2253	0.3331	0.3622	0.3704	0.446	0.3806	0.2679	0.3582	0.4197	0.3734	0.3448	0.2553		H	2Y ONLY				D5 IN 100	D5 1 IN 500	D5 1 IN 2500	D5 1 IN 12500	2Y ONLY

## Sheet: Terminal individual E, F & G
<>	1	2	3	4	5	6	7	8	9	10	11	12			1	2	3	4	5	6	7	8	9	10	11	12
A	0.4104	0.3439	0.3075	0.2822	0.6949	0.5483	0.3756	0.2819	0.3922	0.291	0.2818	0.1974	E1	A	NAÏVE 1 IN 100	NAÏVE 1 IN 500	NAÏVE 1 IN 2500	NAÏVE 1 IN 12500	E1 1 IN 100	E1 1 IN 500	E1 1 IN 2500	E1 1 IN 12500	E1 1 IN 100	E1 1 IN 500	E1 1 IN 2500	E1 1 IN 12500		Protein coated
B	0.3774	0.3631	0.3815	0.3625	0.7262	0.5555	0.4129	0.31	0.3945	0.3649	0.2651	0.2317		B														VLP-sNTX_C
C	0.3681	0.3689	0.2914	0.2861	0.6879	0.5643	0.3925	0.3285	0.4089	0.299	0.2736	0.185		C														nativeVLP
D	0.193	0.4143	0.4557	0.4644	0.4796	0.4026	0.3237	0.3217	0.2746	0.2654	0.2638	0.2031		D	2Y ONLY				E1 IN 100	E1 1 IN 500	E1 1 IN 2500	E1 1 IN 12500	2Y ONLY					Text indicates sera added
E	0.3855	0.4349	0.4754	0.4036	0.8819	0.5409	0.4141	0.3634	0.6131	0.38	0.2727	0.2041	E2	E	NAÏVE 1 IN 100	NAÏVE 1 IN 500	NAÏVE 1 IN 2500	NAÏVE 1 IN 12500	E2 1 IN 100	E2 1 IN 500	E2 1 IN 2500	E2 1 IN 12500	E2 1 IN 100	E2 1 IN 500	E2 1 IN 2500	E2 1 IN 12500		Coating buffer only
F	0.3731	0.4002	0.4344	0.39	0.8293	0.5677	0.4625	0.3583	0.652	0.4249	0.3473	0.1893		F
G	0.4139	0.3819	0.3672	0.395	0.8222	0.6311	0.4054	0.3773	0.611	0.3791	0.3138	0.2202		G
H	0.221	0.2666	0.275	0.3107	0.3568	0.3105	0.3128	0.3705	0.3189	0.264	0.2869	0.2251		H	2Y ONLY				E2 IN 100	E2 1 IN 500	E2 1 IN 2500	E2 1 IN 12500	2Y ONLY
<>	1	2	3	4	5	6	7	8	9	10	11	12			1	2	3	4	5	6	7	8	9	10	11	12
A	0.4226	0.2779	0.268	0.2164	1.8455	1.3802	0.6401	0.3176	1.7706	1.1681	0.583	0.2967	F1	A	NAÏVE 1 IN 100	NAÏVE 1 IN 500	NAÏVE 1 IN 2500	NAÏVE 1 IN 12500	F1 1 IN 100	F1 1 IN 500	F1 1 IN 2500	F1 1 IN 12500	F1 1 IN 100	F1 1 IN 500	F1 1 IN 2500	F1 1 IN 12500		Protein coated
B	0.4229	0.2939	0.2386	0.2207	1.8699	1.335	0.6267	0.2971	1.7991	1.2022	0.6038	0.312		B														VLP-sNTX_F1
C	0.407	0.3233	0.2409	0.2452	1.8527	1.289	0.5788	0.3002	1.7941	1.1729	0.5939	0.2976		C														nativeVLP
D	0.2083	0.2547	0.2502	0.2918	0.3201	0.2722	0.2566	0.2142	0.2472	0.2502	0.2249	0.1751		D	2Y ONLY				F1 IN 100	F1 1 IN 500	F1 1 IN 2500	F1 1 IN 12500	2Y ONLY					Text indicates sera added
E	0.4084	0.3532	0.3426	0.3175	1.9268	1.9973	1.9214	1.5298	1.9427	1.9441	1.777	1.1855	F2	E	NAÏVE 1 IN 100	NAÏVE 1 IN 500	NAÏVE 1 IN 2500	NAÏVE 1 IN 12500	F2 1 IN 100	F2 1 IN 500	F2 1 IN 2500	F2 1 IN 12500	F2 1 IN 100	F2 1 IN 500	F2 1 IN 2500	F2 1 IN 12500		Coating buffer only
F	0.4354	0.3108	0.2587	0.2898	1.9938	1.9679	1.9379	1.558	1.9498	1.9519	1.8224	1.2031		F
G	0.4261	0.3256	0.2805	0.2777	1.9516	1.9916	1.9041	1.6219	1.9719	2.028	1.8124	1.1962		G
H	0.2002	0.2152	0.2005	0.2189	0.2736	0.2589	0.2594	0.2696	0.2483	0.3035	0.2917	0.1872		H	2Y ONLY				F2 IN 100	F2 1 IN 500	F2 1 IN 2500	F2 1 IN 12500	2Y ONLY
<>	1	2	3	4	5	6	7	8	9	10	11	12			1	2	3	4	5	6	7	8	9	10	11	12
A	0.3889	0.2673	0.215	0.2145	2.0299	1.8921	1.5585	0.7866	2.0045	1.8176	1.3436	0.5474	F3	A	NAÏVE 1 IN 100	NAÏVE 1 IN 500	NAÏVE 1 IN 2500	NAÏVE 1 IN 12500	F3 1 IN 100	F3 1 IN 500	F3 1 IN 2500	F3 1 IN 12500	F3 1 IN 100	F3 1 IN 500	F3 1 IN 2500	F3 1 IN 12500		Protein coated
B	0.3599	0.3073	0.2499	0.2504	2.0493	1.894	1.592	0.7572	2.0255	1.8506	1.3478	0.6158		B														VLP-sNTX_F1
C	0.3398	0.3296	0.2843	0.2443	2.0767	1.9022	1.5495	0.7676	2.0113	1.8393	1.3396	0.5725		C														nativeVLP
D	0.1861	0.2949	0.3224	0.2603	1.1438	0.268	0.2824	0.236	0.2574	0.2705	0.2871	0.2042		D	2Y ONLY				F3 IN 100	F3 1 IN 500	F3 1 IN 2500	F3 1 IN 12500	2Y ONLY					Text indicates sera added
E	0.3116	0.3287	0.3161	0.273	0.6216	0.2859	0.4444	0.4209	0.7461	0.3035	0.2514	0.191	F5	E	NAÏVE 1 IN 100	NAÏVE 1 IN 500	NAÏVE 1 IN 2500	NAÏVE 1 IN 12500	F5 1 IN 100	F5 1 IN 500	F5 1 IN 2500	F5 1 IN 12500	F5 1 IN 100	F5 1 IN 500	F5 1 IN 2500	F5 1 IN 12500		Coating buffer only
F	0.2907	0.3179	0.3478	0.3429	0.698	0.3475	0.2953	0.2403	0.6484	0.3544	0.3348	0.2037		F
G	0.2753	0.3161	0.3354	0.325	0.6932	0.352	0.312	0.2596	0.6824	0.3149	0.2814	0.2167		G
H	0.2041	0.2137	0.2639	0.2866	0.2992	0.3189	0.2344	0.2165	0.2063	0.2372	0.2178	0.1873		H	2Y ONLY				F5 IN 100	F5 1 IN 500	F5 1 IN 2500	F5 1 IN 12500	2Y ONLY
<>	1	2	3	4	5	6	7	8	9	10	11	12			1	2	3	4	5	6	7	8	9	10	11	12
A	0.3336	0.2148	0.2085	0.1732	2.0727	1.824	1.1791	0.4819	0.3968	0.2367	0.1828	0.1659	G1	A	NAÏVE 1 IN 100	NAÏVE 1 IN 500	NAÏVE 1 IN 2500	NAÏVE 1 IN 12500	G1 1 IN 100	G1 1 IN 500	G1 1 IN 2500	G1 1 IN 12500	G1 1 IN 100	G1 1 IN 500	G1 1 IN 2500	G1 1 IN 12500		Protein coated
B	0.3319	0.2041	0.1784	0.1708	2.0152	1.8021	1.1349	0.5038	0.3862	0.2391	0.1797	0.1626		B														VLP-sNTX_F2
C	0.3385	0.2008	0.1787	0.177	2.037	1.7998	1.1538	0.5513	0.3862	1.0466	0.1876	0.1563		C														nativeVLP
D	0.1808	0.1674	0.1868	0.1812	0.3542	0.2263	0.179	0.169	0.1707	0.1741	0.1677	0.1461		D	2Y ONLY				G1 IN 100	G1 1 IN 500	G1 1 IN 2500	G1 1 IN 12500	2Y ONLY					Text indicates sera added
E	0.3299	0.2172	0.1781	0.1965	2.0068	2.0907	2.0743	1.756	2.0956	1.9862	1.6989	1.2107	G2	E	NAÏVE 1 IN 100	NAÏVE 1 IN 500	NAÏVE 1 IN 2500	NAÏVE 1 IN 12500	G2 1 IN 100	G2 1 IN 500	G2 1 IN 2500	G2 1 IN 12500	G2 1 IN 100	G2 1 IN 500	G2 1 IN 2500	G2 1 IN 12500		Coating buffer only
F	0.3596	0.2261	0.1901	0.2016	2.1298	2.1542	2.0362	1.769	2.0362	1.9816	1.6313	1.1577		F
G	0.3316	0.2128	0.3331	0.2125	2.0549	2.1689	2.1052	1.7745	2.0933	1.9894	1.7802	1.1224		G
H	0.1549	0.2155	0.1704	0.1791	0.1707	0.158	0.1841	0.1662	0.1788	0.2394	0.1901	0.1534		H	2Y ONLY				G2 IN 100	G2 1 IN 500	G2 1 IN 2500	G2 1 IN 12500	2Y ONLY
<>	1	2	3	4	5	6	7	8	9	10	11	12			1	2	3	4	5	6	7	8	9	10	11	12
A	0.3508	0.2061	0.1664	0.1618	2.099	2.0675	1.8578	1.2437	2.0921	1.8781	1.902	1.4886	G3	A	NAÏVE 1 IN 100	NAÏVE 1 IN 500	NAÏVE 1 IN 2500	NAÏVE 1 IN 12500	G3 1 IN 100	G3 1 IN 500	G3 1 IN 2500	G3 1 IN 12500	G3 1 IN 100	G3 1 IN 500	G3 1 IN 2500	G3 1 IN 12500		Protein coated
B	0.3419	0.2063	0.1747	0.1706	2.155	2.049	1.8657	1.2891	2.0609	1.8409	1.8863	1.4428		B														VLP-sNTX_F2
C	0.3488	0.1976	0.2184	0.1711	2.0199	2.0283	1.8528	1.2681	2.0836	1.7929	1.9157	1.4659		C														nativeVLP
D	0.157	0.1487	0.1502	0.1687	0.1881	0.1604	0.1549	0.1526	0.193	0.1689	0.1577	0.1526		D	2Y ONLY				G3 IN 100	G3 1 IN 500	G3 1 IN 2500	G3 1 IN 12500	2Y ONLY					Text indicates sera added
E	0.3489	0.2087	0.1765	0.166	1.7138	0.9175	0.4229	0.2181	0.8904	0.2552	0.2455	0.176	G4	E	NAÏVE 1 IN 100	NAÏVE 1 IN 500	NAÏVE 1 IN 2500	NAÏVE 1 IN 12500	G4 1 IN 100	G4 1 IN 500	G4 1 IN 2500	G4 1 IN 12500	G4 1 IN 100	G4 1 IN 500	G4 1 IN 2500	G4 1 IN 12500		Coating buffer only
F	0.339	0.2094	0.1752	0.1716	1.7036	0.9225	0.424	0.228	0.8949	0.2651	0.208	0.1748		F
G	0.3507	0.2034	0.1763	0.1874	1.7031	0.9495	0.4076	0.2304	0.8602	0.2484	0.2216	0.1748		G
H	0.1548	0.1662	0.1556	0.1604	0.1936	0.1666	0.1585	0.1609	0.1625	0.1585	0.1563	0.1494		H	2Y ONLY				G4 IN 100	G4 1 IN 500	G4 1 IN 2500	G4 1 IN 12500	2Y ONLY
<>	1	2	3	4	5	6	7	8	9	10	11	12			1	2	3	4	5	6	7	8	9	10	11	12
A	0.3482	0.203	0.1764	0.1534	2.0666	2.0082	1.8271	1.0285	2.0486	1.6996	1.0327	0.469	G5	E	NAÏVE 1 IN 100	NAÏVE 1 IN 500	NAÏVE 1 IN 2500	NAÏVE 1 IN 12500	G5 1 IN 100	G5 1 IN 500	G5 1 IN 2500	G5 1 IN 12500	G5 1 IN 100	G5 1 IN 500	G5 1 IN 2500	G5 1 IN 12500		Protein coated
B	0.3294	0.1916	0.175	0.1736	2.0959	1.9503	1.7344	0.9669	1.9634	1.6737	0.993	0.4897		F														VLP-sNTX_F2
C	0.3269	0.199	0.1718	0.1652	2.0456	1.9754	1.7036	0.9386	1.9283	1.6732	1.0184	0.4905		G														nativeVLP
D	0.1604	0.1616	0.1783	0.2736	0.3203	0.2133	0.1783	0.1671	0.1675	0.173	0.1643	0.1545		H	2Y ONLY				G5 IN 100	G5 1 IN 500	G5 1 IN 2500	G5 1 IN 12500	2Y ONLY					Text indicates sera added
																												Coating buffer only

## Sheet: Terminal individual H, I & J
<>	1	2	3	4	5	6	7	8	9	10	11	12			1	2	3	4	5	6	7	8	9	10	11	12		Protein coated
E	0.2805	0.1935	0.181	0.1744	2.0234	1.9738	1.567	0.9232	1.9648	1.7594	1.1641	0.5359	H1	E	NAÏVE 1 IN 100	NAÏVE 1 IN 500	NAÏVE 1 IN 2500	NAÏVE 1 IN 12500	H1 1 IN 100	H1 1 IN 500	H1 1 IN 2500	H1 1 IN 12500	H1 1 IN 100	H1 1 IN 500	H1 1 IN 2500	H1 1 IN 12500		VLP-PLA2_1
F	0.2777	0.2017	0.1781	0.1825	2.0098	1.827	1.5873	0.9585	1.9256	1.6661	1.1656	0.5414		F														nativeVLP
G	0.2825	0.1948	0.1786	0.1807	2.0662	1.9219	1.6802	0.9693	1.9259	1.7538	1.2074	0.5835		G														Text indicates sera added
H	0.1648	0.1633	0.1504	0.1539	0.2843	0.1756	0.1783	0.1678	0.1606	0.1746	0.1641	0.165		H	2Y ONLY				H1 IN 100	H1 1 IN 500	H1 1 IN 2500	H1 1 IN 12500	2Y ONLY					Coating buffer only
<>	1	2	3	4	5	6	7	8	9	10	11	12			1	2	3	4	5	6	7	8	9	10	11	12
A	0.322	0.2532	0.225	0.4039	1.9354	1.8842	1.571	1.1701	1.9381	1.7057	1.2179	0.5239	H3	A	NAÏVE 1 IN 100	NAÏVE 1 IN 500	NAÏVE 1 IN 2500	NAÏVE 1 IN 12500	H3 1 IN 100	H3 1 IN 500	H3 1 IN 2500	H3 1 IN 12500	H3 1 IN 100	H3 1 IN 500	H3 1 IN 2500	H3 1 IN 12500		Protein coated
B	0.3008	0.2551	0.264	0.5243	1.9295	1.9478	1.5377	1.0508	1.9048	1.6662	1.1447	0.5805		B														VLP-PLA2_1
C	0.3233	0.2577	0.2007	0.2702	1.9619	1.9678	1.4969	0.9868	1.9007	1.68	1.1104	0.5096		C														nativeVLP
D	0.2068	0.2432	0.23	0.3423	0.3125	0.2227	0.1972	0.1935	0.4054	0.5851	0.3924	0.2097		D	2Y ONLY				H3 IN 100	H3 1 IN 500	H3 1 IN 2500	H3 1 IN 12500	2Y ONLY					Text indicates sera added
E	0.318	0.2783	0.2511	0.276	1.9831	1.9076	1.7828	1.5122	1.8973	2.056	1.949	1.2865	H4	E	NAÏVE 1 IN 100	NAÏVE 1 IN 500	NAÏVE 1 IN 2500	NAÏVE 1 IN 12500	H4 1 IN 100	H4 1 IN 500	H4 1 IN 2500	H4 1 IN 12500	H4 1 IN 100	H4 1 IN 500	H4 1 IN 2500	H4 1 IN 12500		Coating buffer only
F	0.333	0.3032	0.259	0.29	1.9377	1.964	1.7807	1.5095	1.9952	1.7783	1.6582	1.2529		F
G	0.3251	0.2874	0.2868	0.4689	1.8882	1.9526	1.7971	1.6107	1.8876	1.7721	1.6397	1.2042		G
H	0.1936	0.2354	0.3091	0.6578	0.2428	0.2363	0.206	0.2066	1.2758	1.2457	0.8378	0.4109		H	2Y ONLY				H4 IN 100	H4 1 IN 500	H4 1 IN 2500	H4 1 IN 12500	2Y ONLY
<>	1	2	3	4	5	6	7	8	9	10	11	12			1	2	3	4	5	6	7	8	9	10	11	12
A	0.3182	0.2035	0.1776	0.1686	2.0322	2.1962	1.2879	0.5678	1.9641	1.7113	0.9255	0.3805	I1	A	NAÏVE 1 IN 100	NAÏVE 1 IN 500	NAÏVE 1 IN 2500	NAÏVE 1 IN 12500	I1 1 IN 100	I1 1 IN 500	I1 1 IN 2500	I1 1 IN 12500	I1 1 IN 100	I1 1 IN 500	I1 1 IN 2500	I1 1 IN 12500		Protein coated
B	0.2847	0.1875	0.1707	0.1682	2.0997	1.8863	1.3148	0.5602	1.9712	1.6971	0.869	0.3191		B														VLP-PLA2_2
C	0.2819	0.1901	0.1711	0.1631	2.0411	1.8851	1.3329	0.606	1.9829	1.6765	0.8388	0.3164		C														nativeVLP
D	0.1595	0.16	0.1675	0.1675	0.1935	0.1748	0.1681	0.1719	0.1708	0.1757	0.1761	0.1603		D	2Y ONLY				I1 IN 100	I1 1 IN 500	I1 1 IN 2500	I1 1 IN 12500	2Y ONLY					Text indicates sera added
E	0.2812	0.1982	0.1791	0.1766	2.0606	1.8449	1.3583	0.6714	2.0053	1.7187	0.8968	0.3818	I2	E	NAÏVE 1 IN 100	NAÏVE 1 IN 500	NAÏVE 1 IN 2500	NAÏVE 1 IN 12500	I2 1 IN 100	I2 1 IN 500	I2 1 IN 2500	I2 1 IN 12500	I2 1 IN 100	I2 1 IN 500	I2 1 IN 2500	I2 1 IN 12500		Coating buffer only
F	0.2745	0.191	0.174	0.1779	2.033	1.8863	1.3849	0.6533	2.0426	1.7716	0.9018	0.41		F
G	0.275	0.2048	0.1724	0.1693	2.0707	1.9166	1.334	0.6442	2.0394	1.7537	0.9419	0.4479		G
H	0.1671	0.157	0.1649	0.1675	0.2803	0.195	0.1753	0.1626	0.1759	0.1871	0.1737	0.1852		H	2Y ONLY				I2 IN 100	I2 1 IN 500	I2 1 IN 2500	I2 1 IN 12500	2Y ONLY
<>	1	2	3	4	5	6	7	8	9	10	11	12			1	2	3	4	5	6	7	8	9	10	11	12
A	0.2686	0.1858	0.1729	0.1713	2.0706	2.0037	1.8853	1.5348	1.9981	1.9478	1.7944	1.3508	I4	A	NAÏVE 1 IN 100	NAÏVE 1 IN 500	NAÏVE 1 IN 2500	NAÏVE 1 IN 12500	I4 1 IN 100	I4 1 IN 500	I4 1 IN 2500	I4 1 IN 12500	I4 1 IN 100	I4 1 IN 500	I4 1 IN 2500	I4 1 IN 12500		Protein coated
B	0.2691	0.1833	0.1766	0.2133	2.035	2.003	1.9002	1.5812	1.965	1.9369	1.7969	1.3821		B														VLP-PLA2_2
C	0.2668	0.1949	0.1695	0.1729	2.0395	2.0274	1.8761	1.5483	1.9807	1.9954	1.8173	1.4036		C														nativeVLP
D	0.1544	0.1619	0.1925	0.1809	0.1952	0.1837	0.1568	0.1582	0.3098	0.3922	0.1999	0.2389		D	2Y ONLY				I4 IN 100	I4 1 IN 500	I4 1 IN 2500	I4 1 IN 12500	2Y ONLY					Text indicates sera added
E	0.27	0.1784	0.1694	0.18	1.8783	1.746	1.2436	0.624	1.55	1.1957	0.5467	0.2663	I5	E	NAÏVE 1 IN 100	NAÏVE 1 IN 500	NAÏVE 1 IN 2500	NAÏVE 1 IN 12500	I5 1 IN 100	I5 1 IN 500	I5 1 IN 2500	I5 1 IN 12500	I5 1 IN 100	I5 1 IN 500	I5 1 IN 2500	I5 1 IN 12500		Coating buffer only
F	0.2946	0.1878	0.1755	0.1815	1.8947	1.8451	1.224	0.5785	1.6325	1.169	0.5829	0.2443		F
G	0.2748	0.1984	0.1863	0.1993	1.9842	1.8066	1.2629	0.5576	1.6288	1.2218	0.5564	0.2404		G
H	0.1677	0.1643	0.1713	0.1817	0.1903	0.1702	0.174	0.1705	0.1709	0.1823	0.1667	0.1597		H	2Y ONLY				I5 IN 100	I5 1 IN 500	I5 1 IN 2500	I5 1 IN 12500	2Y ONLY
	1 IN 100	1 IN 500	1 IN 2500	1 IN 12500	1 IN 100	1 IN 500	1 IN 2500	1 IN 12500	1 IN 100	1 IN 500	1 IN 2500	1 IN 12500
															1	2	3	4	5	6	7	8	9	10	11	12
<>	1	2	3	4	5	6	7	8	9	10	11	12		A	NAÏVE 1 IN 100	NAÏVE 1 IN 500	NAÏVE 1 IN 2500	NAÏVE 1 IN 12500	J2 1 IN 100	J2 1 IN 500	J2 1 IN 2500	J2 1 IN 12500	J2 1 IN 100	J2 1 IN 500	J2 1 IN 2500	J2 1 IN 12500		Protein coated
A	0.3565	0.2378	0.225	0.2003	1.9861	1.8655	1.6089	0.9424	2	1.8268	1.4142	0.8739	J2	B														VLP-PLA2_3
B	0.3448	0.2416	0.2228	0.2076	2.0078	1.8751	1.6107	0.9568	1.9972	1.8238	1.3888	0.7645		C														nativeVLP
C	0.3368	0.2425	0.2447	0.1993	1.9822	1.8772	1.5928	0.9346	2.0123	1.822	1.3888	0.9721		D	2Y ONLY				J2 IN 100	J2 1 IN 500	J2 1 IN 2500	J2 1 IN 12500	2Y ONLY					Text indicates sera added
D	0.2027	0.2	0.2109	0.2175	0.2931	0.2036	0.2065	0.1995	0.2301	0.207	0.2051	0.2172		E	NAÏVE 1 IN 100	NAÏVE 1 IN 500	NAÏVE 1 IN 2500	NAÏVE 1 IN 12500	J3 1 IN 100	J3 1 IN 500	J3 1 IN 2500	J3 1 IN 12500	J3 1 IN 100	J3 1 IN 500	J3 1 IN 2500	J3 1 IN 12500		Coating buffer only
E	0.3413	0.2628	0.2287	0.2005	1.9333	1.8996	1.7048	1.044	2.0107	1.8132	1.4525	1.153	J3	F
F	0.3399	0.2356	0.2258	0.217	1.9693	1.8608	1.6176	1.0283	1.9701	1.801	1.3552	0.7311		G
G	0.3291	0.24	0.2253	0.2184	1.919	1.8523	1.6083	0.992	1.9419	1.7818	1.4288	0.7912		H	2Y ONLY				J3 IN 100	J3 1 IN 500	J3 1 IN 2500	J3 1 IN 12500	2Y ONLY
H	0.2002	0.1961	0.1961	0.2102	0.2959	0.235	0.2373	0.2251	0.2522	0.2137	0.2406	0.2156

## Sheet: Terminal individual K & L
<>	1	2	3	4	5	6	7	8	9	10	11	12			1	2	3	4	5	6	7	8	9	10	11	12
A	0.3814	0.2146	0.1759	0.1612	0.4306	0.3363	0.245	0.1928	0.3883	0.2646	0.2013	0.1729	K1	A	NAÏVE 1 IN 100	NAÏVE 1 IN 500	NAÏVE 1 IN 2500	NAÏVE 1 IN 12500	K1 1 IN 100	K1 1 IN 500	K1 1 IN 2500	K1 1 IN 12500	K1 1 IN 100	K1 1 IN 500	K1 1 IN 2500	K1 1 IN 12500		Protein coated
B	0.348	0.1921	0.1583	0.1506	0.4054	0.3695	0.2244	0.1711	0.3637	0.2532	0.193	0.1654		B														VLP-CORE_STRING
C	0.3838	0.1946	0.1596	0.1532	0.4147	0.3104	0.2325	0.1683	0.366	0.2559	0.1864	0.1625		C														nativeVLP
D	0.1548	0.1559	0.147	0.1604	0.1782	0.1517	0.144	0.1464	0.1463	0.1418	0.1539	0.154		D	2Y ONLY				K1 IN 100	K1 1 IN 500	K1 1 IN 2500	K1 1 IN 12500	2Y ONLY					Text indicates sera added
E	0.3704	0.2173	0.1692	0.1587	2.056	2.0882	1.8109	1.4232	2.0982	1.8633	1.3075	0.4933	K2	E	NAÏVE 1 IN 100	NAÏVE 1 IN 500	NAÏVE 1 IN 2500	NAÏVE 1 IN 12500	K2 1 IN 100	K2 1 IN 500	K2 1 IN 2500	K2 1 IN 12500	K2 1 IN 100	K2 1 IN 500	K2 1 IN 2500	K2 1 IN 12500		Coating buffer only
F	0.3539	0.2095	0.163	0.162	2.0497	2.1165	1.852	1.4062	2.1732	1.7774	1.3124	0.471		F
G	0.359	0.2011	0.1713	0.1774	2.0804	2.0983	1.8831	1.4099	2.1992	1.8963	1.3228	0.462		G
H	0.1518	0.1434	0.1603	0.1537	0.1989	0.1654	0.1499	0.1519	0.1578	0.1509	0.1542	0.1632		H	2Y ONLY				K2 IN 100	K2 1 IN 500	K2 1 IN 2500	K2 1 IN 12500	2Y ONLY
<>	1	2	3	4	5	6	7	8	9	10	11	12			1	2	3	4	5	6	7	8	9	10	11	12
A	0.3773	0.2052	0.1692	0.1675	1.8827	1.1173	0.4461	0.2363	1.6245	0.7759	0.3562	0.2313	K3	A	NAÏVE 1 IN 100	NAÏVE 1 IN 500	NAÏVE 1 IN 2500	NAÏVE 1 IN 12500	K3 1 IN 100	K3 1 IN 500	K3 1 IN 2500	K3 1 IN 12500	K3 1 IN 100	K3 1 IN 500	K3 1 IN 2500	K3 1 IN 12500		Protein coated
B	0.3528	0.2055	0.1602	0.151	1.8308	1.1063	0.4039	0.216	1.6146	0.7112	0.319	0.2028		B														VLP-CORE_STRING
C	0.3692	0.1972	0.1771	0.1517	1.8689	1.0527	0.4024	0.2092	1.5957	0.7279	0.3359	0.216		C														nativeVLP
D	0.1481	0.1532	0.1536	0.1523	0.1652	0.1466	0.1525	0.1492	0.1456	0.1476	0.1433	0.1558		D	2Y ONLY				K3 IN 100	K3 1 IN 500	K3 1 IN 2500	K3 1 IN 12500	2Y ONLY					Text indicates sera added
E	0.3526	0.2021	0.1712	0.1562	2.0284	1.6456	0.8811	0.3735	1.8107	1.2515	0.5763	0.2521	K4	E	NAÏVE 1 IN 100	NAÏVE 1 IN 500	NAÏVE 1 IN 2500	NAÏVE 1 IN 12500	K4 1 IN 100	K4 1 IN 500	K4 1 IN 2500	K4 1 IN 12500	K4 1 IN 100	K4 1 IN 500	K4 1 IN 2500	K4 1 IN 12500		Coating buffer only
F	0.3642	0.1996	0.165	0.1548	2.0193	1.6153	0.8807	0.36	1.8195	1.2751	0.5551	0.2266		F
G	0.3598	0.2027	0.1681	0.151	2.0372	1.5914	0.8507	0.3671	1.751	1.2335	0.5539	0.2261		G
H	0.1556	0.1485	0.1478	0.146	0.1807	0.1515	0.1489	0.1438	0.1441	0.1488	0.1441	0.1558		H	2Y ONLY				K4 IN 100	K4 1 IN 500	K4 1 IN 2500	K4 1 IN 12500	2Y ONLY
<>	1	2	3	4	5	6	7	8	9	10	11	12			1	2	3	4	5	6	7	8	9	10	11	12		Protein coated
A	0.3838	0.2034	0.1676	0.1559	1.869	1.0632	0.4297	0.2295	0.2863	0.1863	0.1695	0.1785	K5	A	NAÏVE 1 IN 100	NAÏVE 1 IN 500	NAÏVE 1 IN 2500	NAÏVE 1 IN 12500	K5 1 IN 100	K5 1 IN 500	K5 1 IN 2500	K5 1 IN 12500	K5 1 IN 100	K5 1 IN 500	K5 1 IN 2500	K5 1 IN 12500		VLP-FINGER_STRING
B	0.3786	0.1988	0.1602	0.1507	1.842	1.0227	0.4137	0.2192	0.2891	0.1998	0.1749	0.155		B														nativeVLP
C	0.4046	0.2111	0.1664	0.1497	1.8518	0.9718	0.4159	0.2213	0.2785	0.1926	0.1651	0.1656		C														Text indicates sera added
D	0.1557	0.1549	0.1544	0.1511	0.2123	0.1618	0.1533	0.1506	0.1533	0.1586	0.1642	0.1597		D	2Y ONLY				K5 IN 100	K5 1 IN 500	K5 1 IN 2500	K5 1 IN 12500	2Y ONLY					Coating buffer only
E	0.6436	0.2893	0.1852	0.1574	2.177	1.7869	1.2888	0.7096	1.7849	1.1772	0.5995	0.2902	L1	E	NAÏVE 1 IN 100	NAÏVE 1 IN 500	NAÏVE 1 IN 2500	NAÏVE 1 IN 12500	L1 1 IN 100	L1 1 IN 500	L1 1 IN 2500	L1 1 IN 12500	L1 1 IN 100	L1 1 IN 500	L1 1 IN 2500	L1 1 IN 12500		VLP-CORE_STRING
F	0.6611	0.2884	0.1882	0.1608	2.1737	1.7908	1.3285	0.7135	1.8257	1.1808	0.5914	0.278		F
G	0.6551	0.3018	0.1938	0.1632	2.1689	1.7775	1.27	0.6253	1.7356	1.2378	0.5496	0.2545		G
H	0.1563	0.1597	0.1573	0.1514	0.1724	0.1572	0.1539	0.1556	0.1588	0.1595	0.1592	0.1643		H	2Y ONLY				L1 IN 100	L1 1 IN 500	L1 1 IN 2500	L1 1 IN 12500	2Y ONLY
<>	1	2	3	4	5	6	7	8	9	10	11	12			1	2	3	4	5	6	7	8	9	10	11	12
A	0.7062	0.3801	0.2826	0.287	1.96	1.5585	0.9543	0.5527	1.5757	0.7824	0.4365	0.308	L2	A	NAÏVE 1 IN 100	NAÏVE 1 IN 500	NAÏVE 1 IN 2500	NAÏVE 1 IN 12500	L2 1 IN 100	L2 1 IN 500	L2 1 IN 2500	L2 1 IN 12500	L2 1 IN 100	L2 1 IN 500	L2 1 IN 2500	L2 1 IN 12500		Protein coated
B	0.6687	0.3765	0.3048	0.2544	1.92	1.5388	0.9098	0.5347	1.5666	0.6929	0.4209	0.2954		B														VLP-FINGER_STRING
C	0.6939	0.3749	0.3227	0.2756	1.9191	1.5131	1.0087	0.4774	1.5533	0.9188	0.447	0.3055		C														nativeVLP
D	0.2774	0.3189	0.252	0.2517	0.231	0.2373	0.2421	0.2301	0.2806	0.3164	0.3094	0.2643		D	2Y ONLY				L2 IN 100	L2 1 IN 500	L2 1 IN 2500	L2 1 IN 12500	2Y ONLY					Text indicates sera added
E	0.6917	0.3686	0.2893	0.2639	2.5183	2.3066	1.8639	1.2524	2.2985	1.7518	1.0631	0.6096	L3	E	NAÏVE 1 IN 100	NAÏVE 1 IN 500	NAÏVE 1 IN 2500	NAÏVE 1 IN 12500	L3 1 IN 100	L3 1 IN 500	L3 1 IN 2500	L3 1 IN 12500	L3 1 IN 100	L3 1 IN 500	L3 1 IN 2500	L3 1 IN 12500		Coating buffer only
F	0.7147	0.3694	0.2958	0.2604	2.3808	2.2652	1.8941	1.275	2.0967	1.6949	1.098	0.5349		F
G	0.6905	0.3578	0.3043	0.2513	2.462	2.1208	1.8814	1.2961	2.0678	1.6788	1.058	0.5292		G
H	0.2701	0.2612	0.2909	0.2614	0.3138	0.2517	0.2417	0.2553	0.2795	0.285	0.2599	0.3067		H	2Y ONLY				L3 IN 100	L3 1 IN 500	L3 1 IN 2500	L3 1 IN 12500	2Y ONLY
<>	1	2	3	4	5	6	7	8	9	10	11	12			1	2	3	4	5	6	7	8	9	10	11	12		Protein coated
A	0.5996	0.2903	0.1894	0.159	2.2115	2.0995	1.7604	1.1985	2.0856	1.8876	1.4214	0.5886	L4	E	NAÏVE 1 IN 100	NAÏVE 1 IN 500	NAÏVE 1 IN 2500	NAÏVE 1 IN 12500	L4 1 IN 100	L4 1 IN 500	L4 1 IN 2500	L4 1 IN 12500	L4 1 IN 100	L4 1 IN 500	L4 1 IN 2500	L4 1 IN 12500		VLP-FINGER_STRING
B	0.5759	0.2877	0.1874	0.1946	2.1626	2.0629	1.707	1.1081	2.0239	1.8427	1.3341	0.5441		F														nativeVLP
C	0.5923	0.276	0.1866	0.1686	2.1813	1.9843	1.7353	1.0641	2.0985	1.9151	1.3571	0.5635		G														Text indicates sera added
D	0.1558	0.1607	0.157	0.1861	0.1778	0.1536	0.1533	0.1667	0.1627	0.1681	0.1641	0.1604		H	2Y ONLY				L4 IN 100	L4 1 IN 500	L4 1 IN 2500	L4 1 IN 12500	2Y ONLY					Coating buffer only

## Sheet: Pooled time course A&M
Week
3	<>	1	2	3	4	5	6	7	8	9	10	11	12			1	2	3	4	5	6	7	8	9	10	11	12
	A	0.2515	0.2657	0.2444	2.45	1.4545	0.5974	0.2447	0.224	0.2224	2.3914	1.2664	0.535		A	NAÏVE 1 IN 100	NAÏVE 1 IN 500	NAÏVE 1 IN 2500	GRP3A 1 IN 100	GRP3A 1 IN 500	GRP3A 1 IN 2500	GRP3A 1 IN 100	GRP3A 1 IN 500	GRP3A 1 IN 2500	GRP3A 1 IN 100	GRP3A 1 IN 500	GRP3A 1 IN 2500		Protein coated
	B	0.2344	0.2364	0.2309	2.4883	1.5302	0.6428	0.237	0.2169	0.2183	2.3909	1.281	0.5624		B														VLP-CTX_C
	C	0.2786	0.2446	0.2248	2.3428	1.4856	0.5785	0.2352	0.2317	0.2185	2.3795	1.2214	0.5734		C
	D	0.2146	0.2371	0.2084	0.2159	0.2176	0.2167	0.2131	0.2305	0.2105	0.2224	0.3018	0.2423		D				2Y ONLY			2Y ONLY			2Y ONLY				PBS
	E	0.2298	0.2271	0.2267	0.4812	0.3037	0.2462	0.2456	0.2244	0.2137	0.2782	0.2526	0.2367		E	NAÏVE 1 IN 100	NAÏVE 1 IN 500	NAÏVE 1 IN 2500	GRP3M 1 IN 100	GRP3M 1 IN 500	GRP3M 1 IN 2500	GRP3M 1 IN 100	GRP3M 1 IN 500	GRP3M 1 IN 2500	GRP3M 1 IN 100	GRP3M 1 IN 500	GRP3M 1 IN 2500		nativeVLP
	F	0.2601	0.2401	0.2626	0.4952	0.3017	0.2401	0.2273	0.236	0.2144	0.2711	0.2636	0.2291		F
	G	0.2313	0.2412	0.2286	0.4953	0.2965	0.2446	0.2334	0.2116	0.2079	0.267	0.2241	0.2255		G														Text indicates sera added
	H	0.2169	0.2274	0.226	0.236	0.2472	0.2598	0.2358	0.2269	0.2266	0.2245	0.2138	0.2248		H				2Y ONLY			2Y ONLY			2Y ONLY
6	<>	1	2	3	4	5	6	7	8	9	10	11	12			1	2	3	4	5	6	7	8	9	10	11	12
	A	0.3498	0.3239	0.3213	2.0597	1.3099	0.6799	0.3541	0.3168	0.2909	0.7403	0.4499	0.3494		A	NAÏVE 1 IN 100	NAÏVE 1 IN 500	NAÏVE 1 IN 2500	GRP3A 1 IN 100	GRP3A 1 IN 500	GRP3A 1 IN 2500	GRP3A 1 IN 100	GRP3A 1 IN 500	GRP3A 1 IN 2500	GRP3A 1 IN 100	GRP3A 1 IN 500	GRP3A 1 IN 2500		Protein coated
	B	0.338	0.3088	0.308	2.0805	1.3102	0.6763	0.3319	0.2956	0.2833	0.7807	0.431	0.3529		B														VLP-CTX_C
	C	0.3363	0.3063	0.3093	2.0197	1.2615	0.6479	0.33	0.2919	0.2821	0.7648	0.4289	0.356		C
	D	0.2965	0.2971	0.2926	0.2833	0.2859	0.3193	0.2775	0.2808	0.2765	0.2939	0.2897	0.2951		D				2Y ONLY			2Y ONLY			2Y ONLY				PBS
	E	0.1831	0.1817	0.178	0.8213	0.4354	0.2543	0.2266	0.192	0.1816	0.5799	0.28	0.1948		E	NAÏVE 1 IN 100	NAÏVE 1 IN 500	NAÏVE 1 IN 2500	GRP3M 1 IN 100	GRP3M 1 IN 500	GRP3M 1 IN 2500	GRP3M 1 IN 100	GRP3M 1 IN 500	GRP3M 1 IN 2500	GRP3M 1 IN 100	GRP3M 1 IN 500	GRP3M 1 IN 2500		nativeVLP
	F	0.1863	0.1995	0.1794	0.8238	0.451	0.2649	0.223	0.1951	0.1735	0.5982	0.278	0.1993		F
	G	0.1902	0.1807	0.1858	0.8237	0.4649	0.2542	0.2255	0.1955	0.1784	0.6123	0.2773	0.1999		G														Text indicates sera added
	H	0.1904	0.1751	0.1764	0.1792	0.1867	0.1919	0.1872	0.1916	0.1881	0.177	0.2265	0.1414		H				2Y ONLY			2Y ONLY			2Y ONLY
10	<>	1	2	3	4	5	6	7	8	9	10	11	12			1	2	3	4	5	6	7	8	9	10	11	12
	A														A														Protein coated
	B														B														VLP-CTX_C
	C														C
	D														D														PBS
	E	0.8345	0.4239	0.3317	1.262	0.301	0.2798	0.285	0.2893	0.3178	0.8264	0.2543	0.335		E	NAÏVE 1 IN 100	NAÏVE 1 IN 500	NAÏVE 1 IN 2500	GRP3M 1 IN 100	no sera	no sera	no sera	no sera	no sera	GRP3M 1 IN 100	no sera	no sera		nativeVLP
	F	0.8387	0.4188	0.3293	0.2948	0.2901	0.2781	0.2805	0.2719	0.3785	0.3063	0.2726	0.305		F				no sera						no sera
	G	0.8131	0.4232	0.348	0.3246	0.2868	0.2992	0.3112	0.2841	0.2845	0.3157	0.2649	0.2937		G														Text indicates sera added
	H	0.3929	0.2856	0.3119	0.3037	0.307	0.2944	0.3052	0.2996	0.313	0.3255	0.2876	0.2565		H				2Y ONLY			2Y ONLY			2Y ONLY
14	<>	1	2	3	4	5	6	7	8	9	10	11	12			1	2	3	4	5	6	7	8	9	10	11	12
	A	0.5014	0.2701	0.1986	1.6085	1.1682	0.6274	0.2249	0.1742	0.1646	0.3605	0.2258	0.1838		A	NAÏVE 1 IN 100	NAÏVE 1 IN 500	NAÏVE 1 IN 2500	GRP3A 1 IN 100	GRP3A 1 IN 500	GRP3A 1 IN 2500	GRP3A 1 IN 100	GRP3A 1 IN 500	GRP3A 1 IN 2500	GRP3A 1 IN 100	GRP3A 1 IN 500	GRP3A 1 IN 2500		Protein coated
	B	0.454	0.2572	0.1928	1.6609	1.1964	0.5785	0.2101	0.1773	0.1574	0.3421	0.2138	0.1735		B														VLP-CTX_C
	C	0.4723	0.2574	0.1945	1.627	1.1212	0.5912	0.203	0.1751	0.1649	0.3788	0.2128	0.1792		C
	D	0.1649	0.1557	0.1686	0.1684	0.1674	0.1778	0.1686	0.1714	0.1652	0.1674	0.1638	0.1631		D				2Y ONLY			2Y ONLY			2Y ONLY				PBS
	E	0.4703	0.2485	0.1964	1.8682	1.165	0.5126	0.2075	0.1797	0.1672	1.2239	0.4562	0.2275		E	NAÏVE 1 IN 100	NAÏVE 1 IN 500	NAÏVE 1 IN 2500	GRP3M 1 IN 100	GRP3M 1 IN 500	GRP3M 1 IN 2500	GRP3M 1 IN 100	GRP3M 1 IN 500	GRP3M 1 IN 2500	GRP3M 1 IN 100	GRP3M 1 IN 500	GRP3M 1 IN 2500		nativeVLP
	F	0.4681	0.2556	0.1944	1.7942	1.1565	0.475	0.2065	0.1832	0.1704	1.1785	0.4609	0.2347		F
	G	0.5204	0.2681	0.1986	1.7978	1.1422	0.5129	0.2143	0.1827	0.169	1.1153	0.4665	0.2447		G														Text indicates sera added
	H	0.1527	0.1562	0.1746	0.1631	0.1694	0.2104	0.1667	0.1726	0.1716	0.1671	0.1656	0.1696		H				2Y ONLY			2Y ONLY			2Y ONLY

## Sheet: Pooled time course B&C
Week
3	<>	1	2	3	4	5	6	7	8	9	10	11	12			1	2	3	4	5	6	7	8	9	10	11	12
	A	0.1741	0.1615	0.1655	2.2664	1.3819	0.4647	0.1812	0.1614	0.1582	1.9903	1.0128	0.3793		A	NAÏVE 1 IN 100	NAÏVE 1 IN 500	NAÏVE 1 IN 2500	GRP3B 1 IN 100	GRP3B 1 IN 500	GRP3B 1 IN 2500	GRP3B 1 IN 100	GRP3B 1 IN 500	GRP3B 1 IN 2500	GRP3B 1 IN 100	GRP3B 1 IN 500	GRP3B 1 IN 2500		Protein coated
	B	0.1621	0.1497	0.4061	2.2211	1.2786	0.4213	0.169	0.164	0.1577	2.1027	1.0028	0.3618		B														VLP-CTX_F
	C	0.2502	0.1538	0.1595	2.2912	1.3105	0.5169	0.1718	0.1628	0.1545	2.0251	0.9959	0.3433		C														VLP-ATX_C
	D	0.15	0.1558	0.1654	0.1688	0.1668	0.1587	0.1578	0.1582	0.1608	0.1609	0.1504	0.1543		D				2Y ONLY			2Y ONLY			2Y ONLY				PBS
	E	0.1752	0.1567	0.1729	2.0962	1.0686	0.3646	0.1762	0.1703	0.1581	1.384	0.5158	0.2262		E	NAÏVE 1 IN 100	NAÏVE 1 IN 500	NAÏVE 1 IN 2500	GRP3C 1 IN 100	GRP3C 1 IN 500	GRP3C 1 IN 2500	GRP3C 1 IN 100	GRP3C 1 IN 500	GRP3C 1 IN 2500	GRP3C 1 IN 100	GRP3C 1 IN 500	GRP3C 1 IN 2500		nativeVLP
	F	0.1773	0.1593	0.3044	2.1847	1.1082	0.3769	0.177	0.1569	0.1676	1.3883	0.5716	0.2548		F
	G	0.1674	0.1557	0.1711	2.2044	1.1674	0.4072	0.1709	0.1683	0.1712	1.5219	0.5789	0.2512		G														Text indicates sera added
	H	0.1667	0.158	0.152	0.1659	0.1611	0.1484	0.1653	0.166	0.1665	0.1595	0.1601	0.1631		H				2Y ONLY			2Y ONLY			2Y ONLY
6	<>	1	2	3	4	5	6	7	8	9	10	11	12			1	2	3	4	5	6	7	8	9	10	11	12
	A	0.1491	0.135	0.149	0.3807	0.1997	0.1524	0.1385	0.1388	0.1333	0.3826	0.1974	0.1642		A	NAÏVE 1 IN 100	NAÏVE 1 IN 500	NAÏVE 1 IN 2500	GRP3B 1 IN 100	GRP3B 1 IN 500	GRP3B 1 IN 2500	No sera	No sera	No sera	GRP3B 1 IN 100	GRP3B 1 IN 500	GRP3B 1 IN 2500		Protein coated
	B	0.1515	0.1356	0.14	0.132	0.1448	0.1408	0.1384	0.1409	0.1354	0.142	0.1428	0.1444		B				No sera	No sera	No sera								VLP-CTX_F
	C	0.1491	0.1371	0.1438	0.1358	0.1457	0.1406	0.1387	0.1401	0.1394	0.1465	0.1465	0.1445		C														VLP-ATX_C
	D	0.1365	0.1471	0.1448	0.1462	0.1612	0.1547	0.1468	0.1494	0.1483	0.1622	0.154	0.1437		D				2Y ONLY			2Y ONLY			2Y ONLY				PBS
	E	0.1504	0.152	0.1652	1.6875	1.7568	1.3321	0.1882	0.2461	0.2131	1.712	1.5387	0.9037		E	NAÏVE 1 IN 100	NAÏVE 1 IN 500	NAÏVE 1 IN 2500	GRP3C 1 IN 100	GRP3C 1 IN 500	GRP3C 1 IN 2500	GRP3C 1 IN 100	GRP3C 1 IN 500	GRP3C 1 IN 2500	GRP3C 1 IN 100	GRP3C 1 IN 500	GRP3C 1 IN 2500		nativeVLP
	F	0.1517	0.1481	0.1701	1.7494	1.7769	1.4076	0.1937	0.1754	0.1487	1.7703	1.4721	0.8911		F
	G	0.1471	0.1427	0.1687	1.6408	1.7892	1.3735	0.2536	0.1769	0.1355	1.7786	1.426	0.9117		G														Text indicates sera added
	H	0.1466	0.144	0.1437	0.1311	0.1598	0.155	0.1498	0.1631	0.1018	0.1614	0.1518	0.1702		H				2Y ONLY			2Y ONLY			2Y ONLY
10	<>	1	2	3	4	5	6	7	8	9	10	11	12			1	2	3	4	5	6	7	8	9	10	11	12
	A	0.9034	0.3886	0.2299	1.6315	0.1862	0.1913	0.1701	0.1548	0.1508	1.4942	0.1551	0.1529		A	NAÏVE 1 IN 100	NAÏVE 1 IN 500	NAÏVE 1 IN 2500	GRP3B 1 IN 100	NO SERA	NO SERA	NO SERA	NO SERA	NO SERA	GRP3B 1 IN 100	NO SERA	NO SERA		Protein coated
	B	0.842	0.3767	0.2	0.1546	0.1566	0.1512	0.1458	0.1586	0.1435	0.1526	0.1419	0.1421		B				NO SERA						NO SERA				VLP-CTX_F
	C	0.8696	0.3575	0.205	0.1568	0.1533	0.1561	0.1486	0.1439	0.1467	0.1484	0.1413	0.1455		C														VLP-ATX_C
	D	0.149	0.1552	0.1557	0.1533	0.1554	0.1519	0.1515	0.1531	0.1479	0.1545	0.1551	0.1549		D				2Y ONLY			2Y ONLY			2Y ONLY				PBS
	E	0.5197	0.2349	0.1761	3.202	3.1103	1.9723	0.2064	0.1617	0.1591	2.7697	2.4594	1.2129		E	NAÏVE 1 IN 100	NAÏVE 1 IN 500	NAÏVE 1 IN 2500	GRP3C 1 IN 100	GRP3C 1 IN 500	GRP3C 1 IN 2500	GRP3C 1 IN 100	GRP3C 1 IN 500	GRP3C 1 IN 2500	GRP3C 1 IN 100	GRP3C 1 IN 500	GRP3C 1 IN 2500		nativeVLP
	F	0.5614	0.2322	0.1784	3.2037	3.082	1.9932	0.2031	0.1654	0.1592	2.7484	2.4048	1.1989		F
	G	0.5731	0.2434	0.1823	3.1813	3.0563	2.1164	0.1564	0.1505	0.1525	0.5045	0.2396	0.167		G							no sera	no sera	no sera	no sera	no sera	no sera		Text indicates sera added
	H	0.161	0.1577	0.1553	0.1541	0.1619	0.1666	0.1694	0.1789	0.1735	0.1699	0.1754	0.1878		H				2Y ONLY			2Y ONLY			2Y ONLY
14	<>	1	2	3	4	5	6	7	8	9	10	11	12			1	2	3	4	5	6	7	8	9	10	11	12
	A	0.4827	0.2873	0.1798	0.7463	0.3064	0.1926	0.4681	0.2449	0.1727	0.5223	0.2705	0.1879		A	NAÏVE 1 IN 100	NAÏVE 1 IN 500	NAÏVE 1 IN 2500	GRP3B 1 IN 100	GRP3B 1 IN 500	GRP3B 1 IN 2500	GRP3B 1 IN 100	GRP3B 1 IN 500	GRP3B 1 IN 2500	GRP3B 1 IN 100	GRP3B 1 IN 500	GRP3B 1 IN 2500		Protein coated
	B	0.4739	0.2668	0.1973	0.778	0.3703	0.2071	0.475	0.2373	0.1757	0.5334	0.2707	0.1764		B														VLP-CTX_F
	C	0.4726	0.2389	0.1783	0.7603	0.3079	0.1987	0.4398	0.2354	0.1722	0.5321	0.2558	0.174		C														VLP-ATX_C
	D	0.1492	0.1522	0.1527	0.1612	0.1647	0.1594	0.1608	0.1539	0.1601	0.1581	0.1644	0.1576		D				2Y ONLY			2Y ONLY			2Y ONLY				PBS
	E	0.3066	0.1959	0.1739	2.4548	2.2772	1.682	0.1861	0.1681	0.1594	2.1337	1.6965	0.8375		E	NAÏVE 1 IN 100	NAÏVE 1 IN 500	NAÏVE 1 IN 2500	GRP3C 1 IN 100	GRP3C 1 IN 500	GRP3C 1 IN 2500	GRP3C 1 IN 100	GRP3C 1 IN 500	GRP3C 1 IN 2500	GRP3C 1 IN 100	GRP3C 1 IN 500	GRP3C 1 IN 2500		nativeVLP
	F	0.2901	0.193	0.1698	2.3944	2.2631	1.7201	0.1938	0.1807	0.1606	2.1825	1.7803	0.8721		F
	G	0.3005	0.1943	0.1741	2.4504	2.3106	1.7086	0.1941	0.1653	0.1608	2.1914	1.8567	1.1419		G														Text indicates sera added
	H	0.1556	0.1542	0.1539	0.1594	0.1638	0.1651	0.1559	0.1645	0.1587	0.1644	0.1647	0.1641		H				2Y ONLY			2Y ONLY			2Y ONLY

## Sheet: Pooled time course D&E
Week
3	<>	1	2	3	4	5	6	7	8	9	10	11	12			1	2	3	4	5	6	7	8	9	10	11	12
	A	0.2011	0.1815	0.1874	2.5311	2.0837	1.0652	0.2214	0.1671	0.1925	1.6694	0.8228	0.3258		A	NAÏVE 1 IN 100	NAÏVE 1 IN 500	NAÏVE 1 IN 2500	GRP3D 1 IN 100	GRP3D 1 IN 500	GRP3D 1 IN 2500	GRP3D 1 IN 100	GRP3D 1 IN 500	GRP3D 1 IN 2500	GRP3D 1 IN 100	GRP3D 1 IN 500	GRP3D 1 IN 2500		Protein coated
	B	0.1893	0.1746	0.1768	2.4003	2.0271	1.0325	0.2239	0.1693	0.1727	1.7005	0.8044	0.3591		B														VLP-ATX_F
	C	0.1822	0.1697	0.1777	2.366	1.9917	1.102	0.2033	0.174	0.1736	1.7058	0.8187	0.3401		C														VLP-sNTX_C
	D	0.1633	0.1691	0.1732	0.1767	0.1742	0.1807	0.175	0.1742	0.1706	0.1793	0.1701	0.1719		D				2Y ONLY			2Y ONLY			2Y ONLY				PBS
	E	0.1811	0.1796	0.1845	1.9085	0.9598	0.3625	0.1925	0.1751	0.1893	1.4041	0.5714	0.2656		E	NAÏVE 1 IN 100	NAÏVE 1 IN 500	NAÏVE 1 IN 2500	GRP3E 1 IN 100	GRP3E 1 IN 500	GRP3E 1 IN 2500	GRP3E 1 IN 100	GRP3E 1 IN 500	GRP3E 1 IN 2500	GRP3E 1 IN 100	GRP3E 1 IN 500	GRP3E 1 IN 2500		nativeVLP
	F	0.1835	0.1821	0.195	1.9477	0.9927	0.3917	0.1947	0.2	0.1789	1.4472	0.5893	0.2627		F
	G	0.191	0.1829	0.1928	1.9435	0.9675	0.4178	0.1979	0.1839	0.1836	1.4433	0.625	0.2657		G														Text indicates sera added
	H	0.1764	0.1833	0.1898	0.1962	0.1952	0.2262	0.2007	0.1723	0.1791	0.1862	0.1402	0.1815		H				2Y ONLY			2Y ONLY			2Y ONLY
6	<>	1	2	3	4	5	6	7	8	9	10	11	12			1	2	3	4	5	6	7	8	9	10	11	12
	A	0.1505	0.1336	0.1392	1.7756	1.7492	1.2107	0.1685	0.148	0.1416	1.6898	1.4216	0.816		A	NAÏVE 1 IN 100	NAÏVE 1 IN 500	NAÏVE 1 IN 2500	GRP3D 1 IN 100	GRP3D 1 IN 500	GRP3D 1 IN 2500	GRP3D 1 IN 100	GRP3D 1 IN 500	GRP3D 1 IN 2500	GRP3D 1 IN 100	GRP3D 1 IN 500	GRP3D 1 IN 2500		Protein coated
	B	0.1414	0.1342	0.14	1.729	1.509	1.1524	0.1666	0.1462	0.1391	1.6853	1.386	0.7856		B														VLP-ATX_F
	C	0.1561	0.1391	0.1444	1.6963	1.4707	1.1801	0.1734	0.1488	0.1464	1.7613	1.4091	0.7567		C														VLP-sNTX_C
	D	0.1435	0.1393	0.1477	0.1396	0.1317	0.1449	0.1248	0.1469	0.1415	0.1439	0.1446	0.1441		D				2Y ONLY			2Y ONLY			2Y ONLY				PBS
	E	0.1522	0.1464	0.1488	1.203	0.5056	0.2443	0.1649	0.1513	0.141	1.3333	0.5782	0.258		E	NAÏVE 1 IN 100	NAÏVE 1 IN 500	NAÏVE 1 IN 2500	GRP3E 1 IN 100	GRP3E 1 IN 500	GRP3E 1 IN 2500	GRP3E 1 IN 100	GRP3E 1 IN 500	GRP3E 1 IN 2500	GRP3E 1 IN 100	GRP3E 1 IN 500	GRP3E 1 IN 2500		nativeVLP
	F	0.173	0.1406	0.1508	1.1822	0.5032	0.2768	0.166	0.1526	0.1454	1.3787	0.6304	0.2676		F
	G	0.1571	0.1439	0.1582	1.2237	0.566	0.2784	0.1776	0.1538	0.1417	1.3681	0.6539	0.2764		G														Text indicates sera added
	H	0.1524	0.1347	0.1428	0.1305	0.125	0.1471	0.1336	0.1561	0.1475	0.1528	0.1454	0.1451		H				2Y ONLY			2Y ONLY			2Y ONLY
10	<>	1	2	3	4	5	6	7	8	9	10	11	12			1	2	3	4	5	6	7	8	9	10	11	12
	A	0.503	0.2444	0.1832	3.1163	2.8	1.781	0.2483	0.1534	0.1582	2.8645	2.4517	1.2325		A	NAÏVE 1 IN 100	NAÏVE 1 IN 500	NAÏVE 1 IN 2500	GRP3D 1 IN 100	GRP3D 1 IN 500	GRP3D 1 IN 2500	GRP3D 1 IN 100	GRP3D 1 IN 500	GRP3D 1 IN 2500	GRP3D 1 IN 100	GRP3D 1 IN 500	GRP3D 1 IN 2500		Protein coated
	B	0.4648	0.2472	0.1945	3.1065	2.7297	1.7297	0.2361	0.2346	0.1644	2.8547	2.3699	1.1934		B														VLP-ATX_F
	C	0.4699	0.2217	0.1773	0.1661	0.1721	0.1752	0.1614	0.194	0.1613	0.1618	0.1591	0.1555		C				no sera	no sera	no sera	no sera	no sera	no sera	no sera	no sera	no sera		VLP-sNTX_C
	D	0.1521	0.1531	0.1636	0.1693	0.1644	0.1649	0.1637	0.1675	0.1702	0.1725	0.1647	0.152		D				2Y ONLY			2Y ONLY			2Y ONLY				PBS
	E	0.6436	0.3076	0.2008	1.7075	0.8946	0.3726	0.196	0.1658	0.1721	0.7005	0.3173	0.1953		E	NAÏVE 1 IN 100	NAÏVE 1 IN 500	NAÏVE 1 IN 2500	GRP3E 1 IN 100	GRP3E 1 IN 500	GRP3E 1 IN 2500	GRP3E 1 IN 100	GRP3E 1 IN 500	GRP3E 1 IN 2500	GRP3E 1 IN 100	GRP3E 1 IN 500	GRP3E 1 IN 2500		nativeVLP
	F	0.6768	0.2915	0.1943	1.7445	0.8984	0.415	0.2194	0.1756	0.1695	0.7629	0.3338	0.1942		F
	G	0.6968	0.3421	0.2158	0.181	0.1808	0.1905	0.1857	0.1511	0.1654	0.1668	0.1757	0.1572		G				no sera	no sera	no sera	no sera	no sera	no sera	no sera	no sera	no sera		Text indicates sera added
	H	0.1806	0.1562	0.1577	0.1638	0.1808	0.1652	0.1767	0.1468	0.1737	0.1581	0.1667	0.1723		H				2Y ONLY			2Y ONLY			2Y ONLY
14	<>	1	2	3	4	5	6	7	8	9	10	11	12			1	2	3	4	5	6	7	8	9	10	11	12
	A	0.4009	0.277	0.2428	2.3987	2.1046	1.5682	0.3017	0.2593	0.2246	2.1412	1.6198	0.8634		A	NAÏVE 1 IN 100	NAÏVE 1 IN 500	NAÏVE 1 IN 2500	GRP3D 1 IN 100	GRP3D 1 IN 500	GRP3D 1 IN 2500	GRP3D 1 IN 100	GRP3D 1 IN 500	GRP3D 1 IN 2500	GRP3D 1 IN 100	GRP3D 1 IN 500	GRP3D 1 IN 2500		Protein coated
	B	0.4113	0.2952	0.2484	2.491	2.0907	1.5176	0.2832	0.2248	0.2068	2.2101	1.5951	0.836		B														VLP-ATX_F
	C	0.4254	0.2433	0.2311	2.4295	2.1242	1.5495	0.2949	0.2427	0.2123	2.1393	1.6138	0.8119		C														VLP-sNTX_C
	D	0.2365	0.2141	0.2165	0.2117	0.2137	0.2176	0.2166	0.2126	0.1993	0.2125	0.203	0.2125		D				2Y ONLY			2Y ONLY			2Y ONLY				PBS
	E	0.6655	0.3383	0.247	1.4296	0.8625	0.4391	0.2488	0.219	0.221	0.4729	0.2644	0.2449		E	NAÏVE 1 IN 100	NAÏVE 1 IN 500	NAÏVE 1 IN 2500	GRP3E 1 IN 100	GRP3E 1 IN 500	GRP3E 1 IN 2500	GRP3E 1 IN 100	GRP3E 1 IN 500	GRP3E 1 IN 2500	GRP3E 1 IN 100	GRP3E 1 IN 500	GRP3E 1 IN 2500		nativeVLP
	F	0.6791	0.318	0.2394	1.4554	0.8844	0.4546	0.232	0.2013	0.1956	0.4548	0.2615	0.2202		F
	G	0.6765	0.3458	0.2457	1.4569	0.8815	0.454	0.2345	0.2381	0.2034	0.4538	0.2744	0.2208		G														Text indicates sera added
	H	0.226	0.219	0.2389	0.2233	0.2098	0.2145	0.2222	0.2118	0.2128	0.2072	0.2061	0.2157		H				2Y ONLY			2Y ONLY			2Y ONLY

[truncated: 4 more sheets: Pooled time course F&G, Pooled time course H&I, Pooled time course J&K, Pooled time course L&4IJ]
