# Supplementary material for: Virus-like particles displaying conserved toxin epitopes stimulate polyspecific, murine antibody responses capable of snake venom recognition
Source: Sci Rep. 2022 Jul 5;12:11328. doi: 10.1038/s41598-022-13376-x (PMC9256628; doi:10.1038/s41598-022-13376-x)
Supplement: Supplementary file 5 — Supplementary Information 5. [file 41598_2022_13376_MOESM5_ESM.xlsx]

## Sheet: PLA2 Bepipred raw data
Entry	Position	AminoAcid	Exposed/Buried	RelativeSurfaceAccessilibity	HelixProbability	SheetProbability	CoilProbability	EpitopeProbability
N.haje.UGA_1903_0.0439098483642701_PLA2	1	L	E	0.477	0.003	0.003	0.994	0.263556
N.haje.UGA_1903_0.0439098483642701_PLA2	2	N	E	0.356	0.053	0.043	0.903	0.305333
N.haje.UGA_1903_0.0439098483642701_PLA2	3	L	B	0.199	0.938	0.007	0.055	0.369111
N.haje.UGA_1903_0.0439098483642701_PLA2	4	Y	E	0.253	0.938	0.007	0.055	0.420333
N.haje.UGA_1903_0.0439098483642701_PLA2	5	Q	B	0.275	0.938	0.007	0.055	0.455778
N.haje.UGA_1903_0.0439098483642701_PLA2	6	F	B	0.053	0.938	0.007	0.055	0.454333
N.haje.UGA_1903_0.0439098483642701_PLA2	7	K	B	0.203	0.923	0.002	0.076	0.472889
N.haje.UGA_1903_0.0439098483642701_PLA2	8	N	E	0.376	0.97	0.001	0.03	0.465333
N.haje.UGA_1903_0.0439098483642701_PLA2	9	M	B	0.06	0.97	0.001	0.03	0.455333
N.haje.UGA_1903_0.0439098483642701_PLA2	10	I	B	0.031	0.97	0.001	0.03	0.426667
N.haje.UGA_1903_0.0439098483642701_PLA2	11	H	E	0.335	0.938	0.007	0.055	0.452667
N.haje.UGA_1903_0.0439098483642701_PLA2	12	C	B	0.216	0.938	0.007	0.055	0.444444
N.haje.UGA_1903_0.0439098483642701_PLA2	13	T	B	0.165	0.802	0.014	0.185	0.456444
N.haje.UGA_1903_0.0439098483642701_PLA2	14	V	B	0.134	0.339	0.016	0.645	0.477444
N.haje.UGA_1903_0.0439098483642701_PLA2	15	P	E	0.522	0.058	0.017	0.925	0.492
N.haje.UGA_1903_0.0439098483642701_PLA2	16	S	E	0.501	0.016	0.005	0.979	0.489222
N.haje.UGA_1903_0.0439098483642701_PLA2	17	R	B	0.268	0.018	0.019	0.964	0.498667
N.haje.UGA_1903_0.0439098483642701_PLA2	18	P	B	0.095	0.058	0.017	0.925	0.497222
N.haje.UGA_1903_0.0439098483642701_PLA2	19	W	B	0.118	0.268	0.043	0.689	0.512444
N.haje.UGA_1903_0.0439098483642701_PLA2	20	W	B	0.186	0.268	0.043	0.689	0.502889
N.haje.UGA_1903_0.0439098483642701_PLA2	21	H	B	0.214	0.386	0.097	0.517	0.499667
N.haje.UGA_1903_0.0439098483642701_PLA2	22	F	B	0.069	0.428	0.171	0.402	0.486778
N.haje.UGA_1903_0.0439098483642701_PLA2	23	A	E	0.248	0.278	0.093	0.628	0.473889
N.haje.UGA_1903_0.0439098483642701_PLA2	24	D	E	0.33	0.191	0.086	0.723	0.476778
N.haje.UGA_1903_0.0439098483642701_PLA2	25	Y	B	0.051	0.052	0.084	0.864	0.461111
N.haje.UGA_1903_0.0439098483642701_PLA2	26	G	B	0.043	0.019	0.141	0.84	0.449667
N.haje.UGA_1903_0.0439098483642701_PLA2	27	C	B	0.026	0.022	0.359	0.619	0.461667
N.haje.UGA_1903_0.0439098483642701_PLA2	28	Y	B	0.064	0.021	0.451	0.528	0.461
N.haje.UGA_1903_0.0439098483642701_PLA2	29	C	B	0.022	0.022	0.359	0.619	0.460556
N.haje.UGA_1903_0.0439098483642701_PLA2	30	G	B	0.062	0.02	0.205	0.775	0.487111
N.haje.UGA_1903_0.0439098483642701_PLA2	31	R	E	0.308	0.018	0.088	0.893	0.510111
N.haje.UGA_1903_0.0439098483642701_PLA2	32	G	B	0.272	0.005	0.015	0.979	0.538111
N.haje.UGA_1903_0.0439098483642701_PLA2	33	G	B	0.256	0.005	0.015	0.979	0.552667
N.haje.UGA_1903_0.0439098483642701_PLA2	34	K	E	0.561	0.018	0.047	0.935	0.570444
N.haje.UGA_1903_0.0439098483642701_PLA2	35	G	E	0.395	0.005	0.045	0.951	0.600333
N.haje.UGA_1903_0.0439098483642701_PLA2	36	T	E	0.422	0.005	0.045	0.951	0.613778
N.haje.UGA_1903_0.0439098483642701_PLA2	37	P	E	0.286	0.018	0.047	0.935	0.615222
N.haje.UGA_1903_0.0439098483642701_PLA2	38	V	E	0.427	0.053	0.043	0.903	0.622667
N.haje.UGA_1903_0.0439098483642701_PLA2	39	D	E	0.49	0.053	0.043	0.903	0.607889
N.haje.UGA_1903_0.0439098483642701_PLA2	40	D	E	0.54	0.052	0.084	0.864	0.586333
N.haje.UGA_1903_0.0439098483642701_PLA2	41	L	E	0.319	0.113	0.087	0.8	0.572444
N.haje.UGA_1903_0.0439098483642701_PLA2	42	D	B	0.3	0.113	0.087	0.8	0.569444
N.haje.UGA_1903_0.0439098483642701_PLA2	43	R	E	0.318	0.191	0.086	0.723	0.569
N.haje.UGA_1903_0.0439098483642701_PLA2	44	C	B	0.048	0.199	0.152	0.649	0.550222
N.haje.UGA_1903_0.0439098483642701_PLA2	45	C	B	0.046	0.216	0.235	0.548	0.533
N.haje.UGA_1903_0.0439098483642701_PLA2	46	Q	B	0.322	0.125	0.227	0.648	0.533889
N.haje.UGA_1903_0.0439098483642701_PLA2	47	I	E	0.359	0.052	0.084	0.864	0.514444
N.haje.UGA_1903_0.0439098483642701_PLA2	48	H	B	0.175	0.053	0.043	0.903	0.503778
N.haje.UGA_1903_0.0439098483642701_PLA2	49	D	E	0.523	0.058	0.017	0.925	0.508667
N.haje.UGA_1903_0.0439098483642701_PLA2	50	N	B	0.22	0.339	0.016	0.645	0.502778
N.haje.UGA_1903_0.0439098483642701_PLA2	51	C	B	0.036	0.622	0.015	0.363	0.482444
N.haje.UGA_1903_0.0439098483642701_PLA2	52	Y	B	0.106	0.858	0.002	0.139	0.485111
N.haje.UGA_1903_0.0439098483642701_PLA2	53	D	E	0.55	0.858	0.002	0.139	0.479
N.haje.UGA_1903_0.0439098483642701_PLA2	54	E	E	0.403	0.858	0.002	0.139	0.479111
N.haje.UGA_1903_0.0439098483642701_PLA2	55	A	B	0.043	0.782	0.003	0.216	0.477333
N.haje.UGA_1903_0.0439098483642701_PLA2	56	G	E	0.499	0.782	0.003	0.216	0.492889
N.haje.UGA_1903_0.0439098483642701_PLA2	57	K	E	0.764	0.622	0.015	0.363	0.490111
N.haje.UGA_1903_0.0439098483642701_PLA2	58	I	B	0.245	0.246	0.004	0.75	0.498778
N.haje.UGA_1903_0.0439098483642701_PLA2	59	S	E	0.65	0.016	0.005	0.979	0.507111
N.haje.UGA_1903_0.0439098483642701_PLA2	60	G	E	0.572	0.005	0.015	0.979	0.523444
N.haje.UGA_1903_0.0439098483642701_PLA2	61	C	B	0.072	0.018	0.047	0.935	0.515
N.haje.UGA_1903_0.0439098483642701_PLA2	62	W	E	0.311	0.004	0.085	0.91	0.528667
N.haje.UGA_1903_0.0439098483642701_PLA2	63	P	E	0.365	0.004	0.197	0.799	0.523444
N.haje.UGA_1903_0.0439098483642701_PLA2	64	Y	E	0.322	0.005	0.336	0.66	0.519444
N.haje.UGA_1903_0.0439098483642701_PLA2	65	F	B	0.174	0.004	0.514	0.481	0.510889
N.haje.UGA_1903_0.0439098483642701_PLA2	66	K	E	0.358	0.004	0.42	0.576	0.504
N.haje.UGA_1903_0.0439098483642701_PLA2	67	V	E	0.38	0.004	0.616	0.381	0.481556
N.haje.UGA_1903_0.0439098483642701_PLA2	68	Y	B	0.089	0.003	0.718	0.279	0.463778
N.haje.UGA_1903_0.0439098483642701_PLA2	69	A	E	0.441	0.002	0.816	0.182	0.454667
N.haje.UGA_1903_0.0439098483642701_PLA2	70	Y	B	0.1	0.001	0.9	0.099	0.454444
N.haje.UGA_1903_0.0439098483642701_PLA2	71	E	E	0.434	0.011	0.918	0.071	0.448333
N.haje.UGA_1903_0.0439098483642701_PLA2	72	C	B	0.139	0.001	0.9	0.099	0.449111
N.haje.UGA_1903_0.0439098483642701_PLA2	73	S	E	0.585	0.002	0.816	0.182	0.438889
N.haje.UGA_1903_0.0439098483642701_PLA2	74	Q	E	0.688	0.005	0.045	0.951	0.436667
N.haje.UGA_1903_0.0439098483642701_PLA2	75	G	E	0.511	0.005	0.015	0.979	0.425222
N.haje.UGA_1903_0.0439098483642701_PLA2	76	A	E	0.561	0.004	0.514	0.481	0.440222
N.haje.UGA_1903_0.0439098483642701_PLA2	77	L	B	0.051	0.002	0.816	0.182	0.460556
N.haje.UGA_1903_0.0439098483642701_PLA2	78	S	E	0.37	0.001	0.959	0.04	0.472
N.haje.UGA_1903_0.0439098483642701_PLA2	79	C	B	0.028	0.001	0.9	0.099	0.471333
N.haje.UGA_1903_0.0439098483642701_PLA2	80	R	E	0.405	0.004	0.42	0.576	0.477111
N.haje.UGA_1903_0.0439098483642701_PLA2	81	G	E	0.697	0.005	0.045	0.951	0.479556
N.haje.UGA_1903_0.0439098483642701_PLA2	82	G	E	0.625	0.003	0.003	0.994	0.480556
N.haje.UGA_1903_0.0439098483642701_PLA2	83	K	E	0.693	0.053	0.005	0.942	0.484556
N.haje.UGA_1903_0.0439098483642701_PLA2	84	N	E	0.508	0.176	0.004	0.82	0.499889
N.haje.UGA_1903_0.0439098483642701_PLA2	85	K	E	0.416	0.782	0.003	0.216	0.484778
N.haje.UGA_1903_0.0439098483642701_PLA2	86	C	B	0.038	0.858	0.002	0.139	0.465889
N.haje.UGA_1903_0.0439098483642701_PLA2	87	A	B	0.226	0.858	0.002	0.139	0.450222
N.haje.UGA_1903_0.0439098483642701_PLA2	88	A	E	0.503	0.938	0.007	0.055	0.450889
N.haje.UGA_1903_0.0439098483642701_PLA2	89	S	B	0.266	0.938	0.007	0.055	0.418778
N.haje.UGA_1903_0.0439098483642701_PLA2	90	V	B	0.109	0.923	0.002	0.076	0.411778
N.haje.UGA_1903_0.0439098483642701_PLA2	91	C	B	0.069	0.858	0.002	0.139	0.424222
N.haje.UGA_1903_0.0439098483642701_PLA2	92	D	E	0.465	0.923	0.002	0.076	0.425667
N.haje.UGA_1903_0.0439098483642701_PLA2	93	C	B	0.038	0.858	0.002	0.139	0.413444
N.haje.UGA_1903_0.0439098483642701_PLA2	94	D	B	0.124	0.923	0.002	0.076	0.403778
N.haje.UGA_1903_0.0439098483642701_PLA2	95	R	E	0.373	0.97	0.001	0.03	0.411556
N.haje.UGA_1903_0.0439098483642701_PLA2	96	L	B	0.23	0.988	0	0.012	0.401778
N.haje.UGA_1903_0.0439098483642701_PLA2	97	A	B	0.029	0.988	0	0.012	0.380556
N.haje.UGA_1903_0.0439098483642701_PLA2	98	A	B	0.038	0.988	0	0.012	0.396556
N.haje.UGA_1903_0.0439098483642701_PLA2	99	I	E	0.277	0.97	0.001	0.03	0.413667
N.haje.UGA_1903_0.0439098483642701_PLA2	100	C	B	0.022	0.97	0.001	0.03	0.413556
N.haje.UGA_1903_0.0439098483642701_PLA2	101	F	B	0.061	0.858	0.002	0.139	0.418556
N.haje.UGA_1903_0.0439098483642701_PLA2	102	A	E	0.316	0.694	0.003	0.303	0.439111
N.haje.UGA_1903_0.0439098483642701_PLA2	103	R	E	0.551	0.502	0.002	0.495	0.467556
N.haje.UGA_1903_0.0439098483642701_PLA2	104	A	B	0.163	0.176	0.004	0.82	0.494
N.haje.UGA_1903_0.0439098483642701_PLA2	105	T	E	0.463	0.058	0.017	0.925	0.532778
N.haje.UGA_1903_0.0439098483642701_PLA2	106	Y	B	0.253	0.053	0.043	0.903	0.569778
N.haje.UGA_1903_0.0439098483642701_PLA2	107	N	B	0.213	0.018	0.019	0.964	0.593222
N.haje.UGA_1903_0.0439098483642701_PLA2	108	D	E	0.611	0.181	0.016	0.803	0.600667
N.haje.UGA_1903_0.0439098483642701_PLA2	109	N	E	0.619	0.181	0.016	0.803	0.603222
N.haje.UGA_1903_0.0439098483642701_PLA2	110	N	E	0.293	0.181	0.016	0.803	0.603
N.haje.UGA_1903_0.0439098483642701_PLA2	111	Y	E	0.325	0.113	0.043	0.844	0.613222
N.haje.UGA_1903_0.0439098483642701_PLA2	112	N	E	0.507	0.053	0.043	0.903	0.614
N.haje.UGA_1903_0.0439098483642701_PLA2	113	I	B	0.171	0.018	0.047	0.935	0.593778
N.haje.UGA_1903_0.0439098483642701_PLA2	114	D	E	0.559	0.018	0.019	0.964	0.583333
N.haje.UGA_1903_0.0439098483642701_PLA2	115	F	E	0.476	0.018	0.019	0.964	0.560556
N.haje.UGA_1903_0.0439098483642701_PLA2	116	N	E	0.547	0.018	0.019	0.964	0.550111
N.haje.UGA_1903_0.0439098483642701_PLA2	117	A	E	0.459	0.018	0.019	0.964	0.478
N.haje.UGA_1903_0.0439098483642701_PLA2	118	R	E	0.447	0.018	0.047	0.935	0.420111
N.haje.UGA_1903_0.0439098483642701_PLA2	119	C	B	0.087	0.018	0.019	0.964	0.359333
N.haje.UGA_1903_0.0439098483642701_PLA2	120	Q	E	0.731	0.003	0.003	0.994	0.293111
N.haje.UGA_1906_0.0439098483642701_PLA2	1	N	E	0.78	0.003	0.003	0.994	0.249667
N.haje.UGA_1906_0.0439098483642701_PLA2	2	L	E	0.275	0.694	0.003	0.303	0.315
N.haje.UGA_1906_0.0439098483642701_PLA2	3	Y	E	0.28	0.802	0.014	0.185	0.367889
N.haje.UGA_1906_0.0439098483642701_PLA2	4	Q	E	0.305	0.879	0.01	0.111	0.404444
N.haje.UGA_1906_0.0439098483642701_PLA2	5	F	B	0.055	0.938	0.007	0.055	0.438889
N.haje.UGA_1906_0.0439098483642701_PLA2	6	K	B	0.247	0.938	0.007	0.055	0.464222
N.haje.UGA_1906_0.0439098483642701_PLA2	7	N	E	0.398	0.938	0.007	0.055	0.461333
N.haje.UGA_1906_0.0439098483642701_PLA2	8	M	B	0.061	0.97	0.001	0.03	0.448556
N.haje.UGA_1906_0.0439098483642701_PLA2	9	I	B	0.031	0.975	0.003	0.022	0.426333
N.haje.UGA_1906_0.0439098483642701_PLA2	10	H	E	0.339	0.938	0.007	0.055	0.447889
N.haje.UGA_1906_0.0439098483642701_PLA2	11	C	B	0.185	0.879	0.01	0.111	0.439889
N.haje.UGA_1906_0.0439098483642701_PLA2	12	T	B	0.128	0.802	0.014	0.185	0.449222
N.haje.UGA_1906_0.0439098483642701_PLA2	13	V	B	0.099	0.339	0.016	0.645	0.47
N.haje.UGA_1906_0.0439098483642701_PLA2	14	P	E	0.476	0.058	0.017	0.925	0.486556
N.haje.UGA_1906_0.0439098483642701_PLA2	15	N	E	0.501	0.018	0.019	0.964	0.486111
N.haje.UGA_1906_0.0439098483642701_PLA2	16	R	B	0.232	0.018	0.019	0.964	0.493333
N.haje.UGA_1906_0.0439098483642701_PLA2	17	P	B	0.111	0.058	0.017	0.925	0.496111
N.haje.UGA_1906_0.0439098483642701_PLA2	18	W	B	0.11	0.339	0.016	0.645	0.515778
N.haje.UGA_1906_0.0439098483642701_PLA2	19	W	B	0.198	0.354	0.048	0.598	0.510222
N.haje.UGA_1906_0.0439098483642701_PLA2	20	H	B	0.226	0.386	0.097	0.517	0.504222
N.haje.UGA_1906_0.0439098483642701_PLA2	21	F	B	0.073	0.428	0.171	0.402	0.490667
N.haje.UGA_1906_0.0439098483642701_PLA2	22	A	E	0.293	0.386	0.097	0.517	0.476444
N.haje.UGA_1906_0.0439098483642701_PLA2	23	N	E	0.399	0.191	0.086	0.723	0.476778
N.haje.UGA_1906_0.0439098483642701_PLA2	24	Y	B	0.054	0.052	0.084	0.864	0.46
N.haje.UGA_1906_0.0439098483642701_PLA2	25	G	B	0.048	0.019	0.141	0.84	0.452333
N.haje.UGA_1906_0.0439098483642701_PLA2	26	C	B	0.028	0.021	0.279	0.699	0.466556
N.haje.UGA_1906_0.0439098483642701_PLA2	27	Y	B	0.08	0.021	0.451	0.528	0.472889
N.haje.UGA_1906_0.0439098483642701_PLA2	28	C	B	0.022	0.021	0.279	0.699	0.477111
N.haje.UGA_1906_0.0439098483642701_PLA2	29	G	B	0.11	0.019	0.141	0.84	0.507
N.haje.UGA_1906_0.0439098483642701_PLA2	30	R	E	0.362	0.018	0.088	0.893	0.530778
N.haje.UGA_1906_0.0439098483642701_PLA2	31	G	E	0.305	0.005	0.015	0.979	0.556556
N.haje.UGA_1906_0.0439098483642701_PLA2	32	G	B	0.29	0.005	0.015	0.979	0.564556
N.haje.UGA_1906_0.0439098483642701_PLA2	33	K	E	0.58	0.018	0.047	0.935	0.578667
N.haje.UGA_1906_0.0439098483642701_PLA2	34	G	E	0.449	0.018	0.047	0.935	0.604556
N.haje.UGA_1906_0.0439098483642701_PLA2	35	T	E	0.43	0.018	0.047	0.935	0.613556
N.haje.UGA_1906_0.0439098483642701_PLA2	36	P	B	0.239	0.018	0.047	0.935	0.605444
N.haje.UGA_1906_0.0439098483642701_PLA2	37	V	E	0.328	0.052	0.084	0.864	0.603
N.haje.UGA_1906_0.0439098483642701_PLA2	38	D	E	0.428	0.018	0.088	0.893	0.578556
N.haje.UGA_1906_0.0439098483642701_PLA2	39	D	E	0.515	0.052	0.084	0.864	0.553333
N.haje.UGA_1906_0.0439098483642701_PLA2	40	L	E	0.299	0.113	0.043	0.844	0.530222
N.haje.UGA_1906_0.0439098483642701_PLA2	41	D	E	0.302	0.184	0.043	0.773	0.524889
N.haje.UGA_1906_0.0439098483642701_PLA2	42	R	E	0.34	0.354	0.048	0.598	0.526222
N.haje.UGA_1906_0.0439098483642701_PLA2	43	C	B	0.031	0.561	0.047	0.393	0.505556
N.haje.UGA_1906_0.0439098483642701_PLA2	44	C	B	0.038	0.605	0.105	0.29	0.489111
N.haje.UGA_1906_0.0439098483642701_PLA2	45	Q	E	0.378	0.605	0.105	0.29	0.490222
N.haje.UGA_1906_0.0439098483642701_PLA2	46	I	E	0.374	0.354	0.048	0.598	0.470778
N.haje.UGA_1906_0.0439098483642701_PLA2	47	H	B	0.124	0.257	0.016	0.727	0.470556
N.haje.UGA_1906_0.0439098483642701_PLA2	48	D	E	0.537	0.181	0.016	0.803	0.483
N.haje.UGA_1906_0.0439098483642701_PLA2	49	K	B	0.283	0.522	0.016	0.462	0.487667
N.haje.UGA_1906_0.0439098483642701_PLA2	50	C	B	0.03	0.717	0.014	0.269	0.475889
N.haje.UGA_1906_0.0439098483642701_PLA2	51	Y	B	0.113	0.923	0.002	0.076	0.482444
N.haje.UGA_1906_0.0439098483642701_PLA2	52	D	E	0.584	0.923	0.002	0.076	0.480556
N.haje.UGA_1906_0.0439098483642701_PLA2	53	E	E	0.345	0.923	0.002	0.076	0.485556
N.haje.UGA_1906_0.0439098483642701_PLA2	54	A	B	0.033	0.923	0.002	0.076	0.487778
N.haje.UGA_1906_0.0439098483642701_PLA2	55	E	E	0.476	0.858	0.002	0.139	0.507333
N.haje.UGA_1906_0.0439098483642701_PLA2	56	K	E	0.719	0.717	0.014	0.269	0.503222
N.haje.UGA_1906_0.0439098483642701_PLA2	57	I	B	0.227	0.246	0.004	0.75	0.509778
N.haje.UGA_1906_0.0439098483642701_PLA2	58	S	E	0.622	0.016	0.005	0.979	0.517667
N.haje.UGA_1906_0.0439098483642701_PLA2	59	G	E	0.416	0.018	0.019	0.964	0.534667
N.haje.UGA_1906_0.0439098483642701_PLA2	60	C	B	0.055	0.018	0.047	0.935	0.522444
N.haje.UGA_1906_0.0439098483642701_PLA2	61	W	E	0.293	0.018	0.088	0.893	0.534889
N.haje.UGA_1906_0.0439098483642701_PLA2	62	P	B	0.326	0.005	0.262	0.733	0.525444
N.haje.UGA_1906_0.0439098483642701_PLA2	63	Y	E	0.309	0.005	0.336	0.66	0.509667
N.haje.UGA_1906_0.0439098483642701_PLA2	64	I	B	0.158	0.004	0.514	0.481	0.496111
N.haje.UGA_1906_0.0439098483642701_PLA2	65	K	E	0.327	0.004	0.42	0.576	0.487444
N.haje.UGA_1906_0.0439098483642701_PLA2	66	T	E	0.356	0.004	0.616	0.381	0.469556
N.haje.UGA_1906_0.0439098483642701_PLA2	67	Y	B	0.064	0.003	0.718	0.279	0.457556
N.haje.UGA_1906_0.0439098483642701_PLA2	68	T	E	0.381	0.002	0.816	0.182	0.454556
N.haje.UGA_1906_0.0439098483642701_PLA2	69	Y	B	0.092	0.001	0.9	0.099	0.455111
N.haje.UGA_1906_0.0439098483642701_PLA2	70	E	E	0.443	0.011	0.918	0.071	0.446778
N.haje.UGA_1906_0.0439098483642701_PLA2	71	S	B	0.157	0.001	0.9	0.099	0.448667
N.haje.UGA_1906_0.0439098483642701_PLA2	72	C	E	0.512	0.003	0.718	0.279	0.448556
N.haje.UGA_1906_0.0439098483642701_PLA2	73	Q	E	0.73	0.005	0.045	0.951	0.448333
N.haje.UGA_1906_0.0439098483642701_PLA2	74	G	E	0.526	0.005	0.045	0.951	0.435444
N.haje.UGA_1906_0.0439098483642701_PLA2	75	T	E	0.561	0.004	0.514	0.481	0.441778
N.haje.UGA_1906_0.0439098483642701_PLA2	76	L	B	0.066	0.002	0.816	0.182	0.447444
N.haje.UGA_1906_0.0439098483642701_PLA2	77	T	E	0.447	0.001	0.9	0.099	0.449333
N.haje.UGA_1906_0.0439098483642701_PLA2	78	C	B	0.039	0.002	0.816	0.182	0.454667
N.haje.UGA_1906_0.0439098483642701_PLA2	79	K	E	0.502	0.005	0.262	0.733	0.459222
N.haje.UGA_1906_0.0439098483642701_PLA2	80	D	E	0.67	0.005	0.045	0.951	0.454556
N.haje.UGA_1906_0.0439098483642701_PLA2	81	G	E	0.619	0.109	0.005	0.886	0.462111
N.haje.UGA_1906_0.0439098483642701_PLA2	82	G	E	0.555	0.246	0.004	0.75	0.458778
N.haje.UGA_1906_0.0439098483642701_PLA2	83	K	E	0.406	0.858	0.002	0.139	0.469444
N.haje.UGA_1906_0.0439098483642701_PLA2	84	C	B	0.036	0.858	0.002	0.139	0.450222
N.haje.UGA_1906_0.0439098483642701_PLA2	85	A	B	0.222	0.923	0.002	0.076	0.443556
N.haje.UGA_1906_0.0439098483642701_PLA2	86	A	E	0.49	0.923	0.002	0.076	0.440556
N.haje.UGA_1906_0.0439098483642701_PLA2	87	S	B	0.219	0.97	0.001	0.03	0.410889
N.haje.UGA_1906_0.0439098483642701_PLA2	88	V	B	0.08	0.97	0.001	0.03	0.398333
N.haje.UGA_1906_0.0439098483642701_PLA2	89	C	B	0.069	0.923	0.002	0.076	0.407889
N.haje.UGA_1906_0.0439098483642701_PLA2	90	D	E	0.438	0.923	0.002	0.076	0.409778
N.haje.UGA_1906_0.0439098483642701_PLA2	91	C	B	0.034	0.923	0.002	0.076	0.400222
N.haje.UGA_1906_0.0439098483642701_PLA2	92	D	B	0.118	0.923	0.002	0.076	0.392222
N.haje.UGA_1906_0.0439098483642701_PLA2	93	R	E	0.371	0.97	0.001	0.03	0.404
N.haje.UGA_1906_0.0439098483642701_PLA2	94	V	B	0.246	0.988	0	0.012	0.393667
N.haje.UGA_1906_0.0439098483642701_PLA2	95	A	B	0.03	0.988	0	0.012	0.376667
N.haje.UGA_1906_0.0439098483642701_PLA2	96	A	B	0.039	0.988	0	0.012	0.395
N.haje.UGA_1906_0.0439098483642701_PLA2	97	N	E	0.294	0.97	0.001	0.03	0.416
N.haje.UGA_1906_0.0439098483642701_PLA2	98	C	B	0.022	0.97	0.001	0.03	0.413667
N.haje.UGA_1906_0.0439098483642701_PLA2	99	F	B	0.062	0.858	0.002	0.139	0.419333
N.haje.UGA_1906_0.0439098483642701_PLA2	100	A	E	0.284	0.694	0.003	0.303	0.440556
N.haje.UGA_1906_0.0439098483642701_PLA2	101	R	E	0.537	0.502	0.002	0.495	0.469111
N.haje.UGA_1906_0.0439098483642701_PLA2	102	A	B	0.14	0.109	0.005	0.886	0.496778
N.haje.UGA_1906_0.0439098483642701_PLA2	103	T	E	0.46	0.058	0.017	0.925	0.536444
N.haje.UGA_1906_0.0439098483642701_PLA2	104	Y	B	0.227	0.018	0.047	0.935	0.562222
N.haje.UGA_1906_0.0439098483642701_PLA2	105	N	E	0.256	0.018	0.019	0.964	0.583444
N.haje.UGA_1906_0.0439098483642701_PLA2	106	D	E	0.613	0.181	0.016	0.803	0.584889
N.haje.UGA_1906_0.0439098483642701_PLA2	107	K	E	0.619	0.181	0.016	0.803	0.591889
N.haje.UGA_1906_0.0439098483642701_PLA2	108	N	B	0.252	0.181	0.016	0.803	0.593
N.haje.UGA_1906_0.0439098483642701_PLA2	109	Y	E	0.313	0.184	0.043	0.773	0.602333
N.haje.UGA_1906_0.0439098483642701_PLA2	110	N	E	0.497	0.053	0.043	0.903	0.604889
N.haje.UGA_1906_0.0439098483642701_PLA2	111	I	B	0.176	0.053	0.043	0.903	0.588
N.haje.UGA_1906_0.0439098483642701_PLA2	112	D	E	0.489	0.018	0.019	0.964	0.577
N.haje.UGA_1906_0.0439098483642701_PLA2	113	F	E	0.486	0.018	0.019	0.964	0.560889
N.haje.UGA_1906_0.0439098483642701_PLA2	114	N	E	0.594	0.018	0.019	0.964	0.551556
N.haje.UGA_1906_0.0439098483642701_PLA2	115	A	E	0.481	0.018	0.019	0.964	0.481333
N.haje.UGA_1906_0.0439098483642701_PLA2	116	R	E	0.468	0.018	0.019	0.964	0.419333
N.haje.UGA_1906_0.0439098483642701_PLA2	117	C	B	0.091	0.018	0.019	0.964	0.359
N.haje.UGA_1906_0.0439098483642701_PLA2	118	Q	E	0.745	0.003	0.003	0.994	0.293444
N.melanoleuca_1875_1710_1608_7.7707_PLA2	1	N	E	0.775	0.003	0.003	0.994	0.252
N.melanoleuca_1875_1710_1608_7.7707_PLA2	2	L	E	0.28	0.717	0.014	0.269	0.320222
N.melanoleuca_1875_1710_1608_7.7707_PLA2	3	Y	E	0.281	0.802	0.014	0.185	0.372889
N.melanoleuca_1875_1710_1608_7.7707_PLA2	4	Q	E	0.321	0.879	0.01	0.111	0.411333
N.melanoleuca_1875_1710_1608_7.7707_PLA2	5	F	B	0.06	0.938	0.007	0.055	0.446889
N.melanoleuca_1875_1710_1608_7.7707_PLA2	6	K	B	0.27	0.938	0.007	0.055	0.472667
N.melanoleuca_1875_1710_1608_7.7707_PLA2	7	N	E	0.395	0.938	0.007	0.055	0.471333
N.melanoleuca_1875_1710_1608_7.7707_PLA2	8	M	B	0.058	0.938	0.007	0.055	0.458667
N.melanoleuca_1875_1710_1608_7.7707_PLA2	9	I	B	0.037	0.938	0.007	0.055	0.440111
N.melanoleuca_1875_1710_1608_7.7707_PLA2	10	Q	E	0.331	0.879	0.01	0.111	0.459333
N.melanoleuca_1875_1710_1608_7.7707_PLA2	11	C	B	0.174	0.802	0.014	0.185	0.449333
N.melanoleuca_1875_1710_1608_7.7707_PLA2	12	T	B	0.121	0.751	0.05	0.199	0.463444
N.melanoleuca_1875_1710_1608_7.7707_PLA2	13	V	B	0.098	0.354	0.048	0.598	0.484889
N.melanoleuca_1875_1710_1608_7.7707_PLA2	14	P	E	0.404	0.058	0.017	0.925	0.499889
N.melanoleuca_1875_1710_1608_7.7707_PLA2	15	N	E	0.617	0.018	0.019	0.964	0.5
N.melanoleuca_1875_1710_1608_7.7707_PLA2	16	R	B	0.297	0.018	0.019	0.964	0.507333
N.melanoleuca_1875_1710_1608_7.7707_PLA2	17	S	B	0.114	0.016	0.005	0.979	0.516222
N.melanoleuca_1875_1710_1608_7.7707_PLA2	18	W	B	0.092	0.339	0.016	0.645	0.536556
N.melanoleuca_1875_1710_1608_7.7707_PLA2	19	W	B	0.238	0.354	0.048	0.598	0.531556
N.melanoleuca_1875_1710_1608_7.7707_PLA2	20	H	B	0.272	0.386	0.097	0.517	0.526444
N.melanoleuca_1875_1710_1608_7.7707_PLA2	21	F	B	0.092	0.386	0.097	0.517	0.509333
N.melanoleuca_1875_1710_1608_7.7707_PLA2	22	A	E	0.332	0.278	0.093	0.628	0.492889
N.melanoleuca_1875_1710_1608_7.7707_PLA2	23	N	E	0.405	0.191	0.086	0.723	0.495
N.melanoleuca_1875_1710_1608_7.7707_PLA2	24	Y	B	0.057	0.052	0.084	0.864	0.477444
N.melanoleuca_1875_1710_1608_7.7707_PLA2	25	G	B	0.047	0.019	0.141	0.84	0.465222
N.melanoleuca_1875_1710_1608_7.7707_PLA2	26	C	B	0.027	0.022	0.359	0.619	0.471556
N.melanoleuca_1875_1710_1608_7.7707_PLA2	27	Y	B	0.088	0.021	0.451	0.528	0.476556
N.melanoleuca_1875_1710_1608_7.7707_PLA2	28	C	B	0.02	0.022	0.359	0.619	0.474667
N.melanoleuca_1875_1710_1608_7.7707_PLA2	29	G	B	0.092	0.02	0.205	0.775	0.497222
N.melanoleuca_1875_1710_1608_7.7707_PLA2	30	R	E	0.31	0.019	0.141	0.84	0.526333
N.melanoleuca_1875_1710_1608_7.7707_PLA2	31	G	E	0.358	0.005	0.045	0.951	0.556778
N.melanoleuca_1875_1710_1608_7.7707_PLA2	32	G	B	0.254	0.005	0.045	0.951	0.565111
N.melanoleuca_1875_1710_1608_7.7707_PLA2	33	S	E	0.565	0.018	0.088	0.893	0.581778
N.melanoleuca_1875_1710_1608_7.7707_PLA2	34	G	E	0.453	0.018	0.047	0.935	0.610444
N.melanoleuca_1875_1710_1608_7.7707_PLA2	35	T	E	0.436	0.018	0.047	0.935	0.620778
N.melanoleuca_1875_1710_1608_7.7707_PLA2	36	P	E	0.272	0.018	0.047	0.935	0.613778
N.melanoleuca_1875_1710_1608_7.7707_PLA2	37	V	E	0.401	0.053	0.043	0.903	0.617222
N.melanoleuca_1875_1710_1608_7.7707_PLA2	38	D	E	0.447	0.018	0.047	0.935	0.598667
N.melanoleuca_1875_1710_1608_7.7707_PLA2	39	D	E	0.549	0.053	0.043	0.903	0.568889
N.melanoleuca_1875_1710_1608_7.7707_PLA2	40	L	E	0.334	0.053	0.043	0.903	0.541889
N.melanoleuca_1875_1710_1608_7.7707_PLA2	41	D	E	0.331	0.113	0.043	0.844	0.537556
N.melanoleuca_1875_1710_1608_7.7707_PLA2	42	R	E	0.339	0.278	0.093	0.628	0.538444
N.melanoleuca_1875_1710_1608_7.7707_PLA2	43	C	B	0.029	0.428	0.171	0.402	0.521
N.melanoleuca_1875_1710_1608_7.7707_PLA2	44	C	B	0.059	0.428	0.171	0.402	0.504
N.melanoleuca_1875_1710_1608_7.7707_PLA2	45	Q	E	0.408	0.428	0.171	0.402	0.5
N.melanoleuca_1875_1710_1608_7.7707_PLA2	46	I	E	0.437	0.191	0.086	0.723	0.478222
N.melanoleuca_1875_1710_1608_7.7707_PLA2	47	H	B	0.167	0.113	0.043	0.844	0.473111
N.melanoleuca_1875_1710_1608_7.7707_PLA2	48	D	E	0.595	0.058	0.017	0.925	0.471444
N.melanoleuca_1875_1710_1608_7.7707_PLA2	49	N	B	0.282	0.257	0.016	0.727	0.469667
N.melanoleuca_1875_1710_1608_7.7707_PLA2	50	C	B	0.047	0.522	0.016	0.462	0.452444
N.melanoleuca_1875_1710_1608_7.7707_PLA2	51	Y	B	0.116	0.802	0.014	0.185	0.458222
N.melanoleuca_1875_1710_1608_7.7707_PLA2	52	G	E	0.544	0.802	0.014	0.185	0.454111
N.melanoleuca_1875_1710_1608_7.7707_PLA2	53	E	E	0.428	0.782	0.003	0.216	0.455889
N.melanoleuca_1875_1710_1608_7.7707_PLA2	54	A	B	0.055	0.782	0.003	0.216	0.458444
N.melanoleuca_1875_1710_1608_7.7707_PLA2	55	E	E	0.506	0.694	0.003	0.303	0.478889
N.melanoleuca_1875_1710_1608_7.7707_PLA2	56	K	E	0.745	0.522	0.016	0.462	0.478222
N.melanoleuca_1875_1710_1608_7.7707_PLA2	57	I	B	0.216	0.181	0.016	0.803	0.498778
N.melanoleuca_1875_1710_1608_7.7707_PLA2	58	S	E	0.664	0.016	0.005	0.979	0.510778
N.melanoleuca_1875_1710_1608_7.7707_PLA2	59	G	E	0.497	0.005	0.015	0.979	0.532222
N.melanoleuca_1875_1710_1608_7.7707_PLA2	60	C	B	0.035	0.018	0.047	0.935	0.520444
N.melanoleuca_1875_1710_1608_7.7707_PLA2	61	W	E	0.306	0.018	0.088	0.893	0.531333
N.melanoleuca_1875_1710_1608_7.7707_PLA2	62	P	B	0.316	0.02	0.205	0.775	0.527111
N.melanoleuca_1875_1710_1608_7.7707_PLA2	63	Y	E	0.379	0.005	0.262	0.733	0.515
N.melanoleuca_1875_1710_1608_7.7707_PLA2	64	I	B	0.186	0.004	0.42	0.576	0.5
N.melanoleuca_1875_1710_1608_7.7707_PLA2	65	K	E	0.355	0.005	0.336	0.66	0.496444
N.melanoleuca_1875_1710_1608_7.7707_PLA2	66	T	E	0.364	0.004	0.514	0.481	0.476111
N.melanoleuca_1875_1710_1608_7.7707_PLA2	67	Y	B	0.099	0.004	0.616	0.381	0.464111
N.melanoleuca_1875_1710_1608_7.7707_PLA2	68	T	E	0.409	0.003	0.718	0.279	0.464444
N.melanoleuca_1875_1710_1608_7.7707_PLA2	69	Y	B	0.103	0.002	0.816	0.182	0.470556
N.melanoleuca_1875_1710_1608_7.7707_PLA2	70	E	E	0.405	0.001	0.9	0.099	0.464
N.melanoleuca_1875_1710_1608_7.7707_PLA2	71	S	B	0.135	0.001	0.959	0.04	0.468333
N.melanoleuca_1875_1710_1608_7.7707_PLA2	72	C	E	0.435	0.002	0.816	0.182	0.48
N.melanoleuca_1875_1710_1608_7.7707_PLA2	73	Q	E	0.687	0.004	0.138	0.858	0.489111
N.melanoleuca_1875_1710_1608_7.7707_PLA2	74	G	E	0.699	0.005	0.015	0.979	0.492
N.melanoleuca_1875_1710_1608_7.7707_PLA2	75	T	E	0.607	0.004	0.42	0.576	0.504111
N.melanoleuca_1875_1710_1608_7.7707_PLA2	76	L	B	0.185	0.003	0.718	0.279	0.524333
N.melanoleuca_1875_1710_1608_7.7707_PLA2	77	T	E	0.381	0.003	0.718	0.279	0.522222
N.melanoleuca_1875_1710_1608_7.7707_PLA2	78	S	B	0.238	0.004	0.616	0.381	0.522333
N.melanoleuca_1875_1710_1608_7.7707_PLA2	79	C	E	0.323	0.005	0.262	0.733	0.522556
N.melanoleuca_1875_1710_1608_7.7707_PLA2	80	G	E	0.702	0.005	0.045	0.951	0.522
N.melanoleuca_1875_1710_1608_7.7707_PLA2	81	A	E	0.677	0.003	0.003	0.994	0.509111
N.melanoleuca_1875_1710_1608_7.7707_PLA2	82	N	E	0.588	0.053	0.005	0.942	0.508889
N.melanoleuca_1875_1710_1608_7.7707_PLA2	83	N	E	0.547	0.246	0.004	0.75	0.505556
N.melanoleuca_1875_1710_1608_7.7707_PLA2	84	K	E	0.401	0.782	0.003	0.216	0.490667
N.melanoleuca_1875_1710_1608_7.7707_PLA2	85	C	B	0.034	0.858	0.002	0.139	0.471667
N.melanoleuca_1875_1710_1608_7.7707_PLA2	86	A	B	0.249	0.858	0.002	0.139	0.459889
N.melanoleuca_1875_1710_1608_7.7707_PLA2	87	A	E	0.515	0.923	0.002	0.076	0.453667
N.melanoleuca_1875_1710_1608_7.7707_PLA2	88	S	B	0.256	0.923	0.002	0.076	0.427333
N.melanoleuca_1875_1710_1608_7.7707_PLA2	89	V	B	0.135	0.858	0.002	0.139	0.422222
N.melanoleuca_1875_1710_1608_7.7707_PLA2	90	C	B	0.068	0.782	0.003	0.216	0.438889
N.melanoleuca_1875_1710_1608_7.7707_PLA2	91	D	E	0.493	0.782	0.003	0.216	0.441
N.melanoleuca_1875_1710_1608_7.7707_PLA2	92	C	B	0.05	0.694	0.003	0.303	0.431111
N.melanoleuca_1875_1710_1608_7.7707_PLA2	93	D	B	0.165	0.694	0.003	0.303	0.421556
N.melanoleuca_1875_1710_1608_7.7707_PLA2	94	R	E	0.393	0.97	0.001	0.03	0.423111
N.melanoleuca_1875_1710_1608_7.7707_PLA2	95	V	E	0.329	0.97	0.001	0.03	0.413111
N.melanoleuca_1875_1710_1608_7.7707_PLA2	96	A	B	0.038	0.988	0	0.012	0.400778
N.melanoleuca_1875_1710_1608_7.7707_PLA2	97	A	B	0.047	0.97	0.001	0.03	0.421111
N.melanoleuca_1875_1710_1608_7.7707_PLA2	98	N	E	0.327	0.97	0.001	0.03	0.439222
N.melanoleuca_1875_1710_1608_7.7707_PLA2	99	C	B	0.025	0.923	0.002	0.076	0.433
N.melanoleuca_1875_1710_1608_7.7707_PLA2	100	F	B	0.062	0.858	0.002	0.139	0.438778
N.melanoleuca_1875_1710_1608_7.7707_PLA2	101	A	E	0.312	0.694	0.003	0.303	0.457889
N.melanoleuca_1875_1710_1608_7.7707_PLA2	102	R	E	0.548	0.406	0.004	0.59	0.484778
N.melanoleuca_1875_1710_1608_7.7707_PLA2	103	A	B	0.145	0.109	0.005	0.886	0.511444
N.melanoleuca_1875_1710_1608_7.7707_PLA2	104	T	E	0.457	0.058	0.017	0.925	0.546667
N.melanoleuca_1875_1710_1608_7.7707_PLA2	105	Y	B	0.247	0.018	0.047	0.935	0.568444
N.melanoleuca_1875_1710_1608_7.7707_PLA2	106	N	B	0.222	0.018	0.019	0.964	0.582556
N.melanoleuca_1875_1710_1608_7.7707_PLA2	107	D	E	0.591	0.184	0.043	0.773	0.582
N.melanoleuca_1875_1710_1608_7.7707_PLA2	108	K	E	0.611	0.257	0.016	0.727	0.588444
N.melanoleuca_1875_1710_1608_7.7707_PLA2	109	N	B	0.246	0.181	0.016	0.803	0.585
N.melanoleuca_1875_1710_1608_7.7707_PLA2	110	Y	B	0.287	0.184	0.043	0.773	0.594222
N.melanoleuca_1875_1710_1608_7.7707_PLA2	111	N	E	0.495	0.053	0.043	0.903	0.596333
N.melanoleuca_1875_1710_1608_7.7707_PLA2	112	I	B	0.173	0.053	0.043	0.903	0.579556
N.melanoleuca_1875_1710_1608_7.7707_PLA2	113	D	E	0.484	0.018	0.019	0.964	0.571
N.melanoleuca_1875_1710_1608_7.7707_PLA2	114	F	E	0.498	0.018	0.019	0.964	0.555444
N.melanoleuca_1875_1710_1608_7.7707_PLA2	115	N	E	0.601	0.018	0.019	0.964	0.549444
N.melanoleuca_1875_1710_1608_7.7707_PLA2	116	A	E	0.475	0.018	0.019	0.964	0.480333
N.melanoleuca_1875_1710_1608_7.7707_PLA2	117	R	E	0.458	0.018	0.019	0.964	0.418556
N.melanoleuca_1875_1710_1608_7.7707_PLA2	118	C	B	0.092	0.018	0.019	0.964	0.359
N.melanoleuca_1875_1710_1608_7.7707_PLA2	119	Q	E	0.742	0.003	0.003	0.994	0.293222
N.melanoleuca_1933_1786_1808_2025_2511_1820_1826_2497_7.3519_PLA2	1	N	E	0.787	0.003	0.003	0.994	0.251556
N.melanoleuca_1933_1786_1808_2025_2511_1820_1826_2497_7.3519_PLA2	2	L	E	0.285	0.694	0.003	0.303	0.318556
N.melanoleuca_1933_1786_1808_2025_2511_1820_1826_2497_7.3519_PLA2	3	Y	E	0.283	0.802	0.014	0.185	0.369778
N.melanoleuca_1933_1786_1808_2025_2511_1820_1826_2497_7.3519_PLA2	4	Q	E	0.316	0.802	0.014	0.185	0.404222
N.melanoleuca_1933_1786_1808_2025_2511_1820_1826_2497_7.3519_PLA2	5	F	B	0.058	0.938	0.007	0.055	0.439333
N.melanoleuca_1933_1786_1808_2025_2511_1820_1826_2497_7.3519_PLA2	6	K	B	0.274	0.938	0.007	0.055	0.464667
N.melanoleuca_1933_1786_1808_2025_2511_1820_1826_2497_7.3519_PLA2	7	N	E	0.4	0.938	0.007	0.055	0.459889
N.melanoleuca_1933_1786_1808_2025_2511_1820_1826_2497_7.3519_PLA2	8	M	B	0.048	0.938	0.007	0.055	0.443222
N.melanoleuca_1933_1786_1808_2025_2511_1820_1826_2497_7.3519_PLA2	9	I	B	0.035	0.938	0.007	0.055	0.424556
N.melanoleuca_1933_1786_1808_2025_2511_1820_1826_2497_7.3519_PLA2	10	H	E	0.351	0.879	0.01	0.111	0.445444
N.melanoleuca_1933_1786_1808_2025_2511_1820_1826_2497_7.3519_PLA2	11	C	B	0.175	0.879	0.01	0.111	0.438
N.melanoleuca_1933_1786_1808_2025_2511_1820_1826_2497_7.3519_PLA2	12	T	B	0.117	0.751	0.05	0.199	0.453444
N.melanoleuca_1933_1786_1808_2025_2511_1820_1826_2497_7.3519_PLA2	13	V	B	0.097	0.268	0.043	0.689	0.477889
N.melanoleuca_1933_1786_1808_2025_2511_1820_1826_2497_7.3519_PLA2	14	P	E	0.407	0.058	0.017	0.925	0.494
N.melanoleuca_1933_1786_1808_2025_2511_1820_1826_2497_7.3519_PLA2	15	N	E	0.631	0.018	0.019	0.964	0.495778
N.melanoleuca_1933_1786_1808_2025_2511_1820_1826_2497_7.3519_PLA2	16	R	B	0.296	0.018	0.019	0.964	0.510889
N.melanoleuca_1933_1786_1808_2025_2511_1820_1826_2497_7.3519_PLA2	17	S	B	0.127	0.016	0.005	0.979	0.525889
N.melanoleuca_1933_1786_1808_2025_2511_1820_1826_2497_7.3519_PLA2	18	W	B	0.091	0.257	0.016	0.727	0.547667
N.melanoleuca_1933_1786_1808_2025_2511_1820_1826_2497_7.3519_PLA2	19	W	B	0.224	0.268	0.043	0.689	0.541778
N.melanoleuca_1933_1786_1808_2025_2511_1820_1826_2497_7.3519_PLA2	20	H	E	0.314	0.278	0.093	0.628	0.535333
N.melanoleuca_1933_1786_1808_2025_2511_1820_1826_2497_7.3519_PLA2	21	F	B	0.097	0.307	0.165	0.527	0.518333
N.melanoleuca_1933_1786_1808_2025_2511_1820_1826_2497_7.3519_PLA2	22	A	E	0.333	0.199	0.152	0.649	0.502556
N.melanoleuca_1933_1786_1808_2025_2511_1820_1826_2497_7.3519_PLA2	23	N	E	0.367	0.118	0.15	0.732	0.503444
N.melanoleuca_1933_1786_1808_2025_2511_1820_1826_2497_7.3519_PLA2	24	Y	B	0.057	0.056	0.142	0.802	0.484556
N.melanoleuca_1933_1786_1808_2025_2511_1820_1826_2497_7.3519_PLA2	25	G	B	0.044	0.02	0.205	0.775	0.467222
N.melanoleuca_1933_1786_1808_2025_2511_1820_1826_2497_7.3519_PLA2	26	C	B	0.028	0.022	0.359	0.619	0.473556
N.melanoleuca_1933_1786_1808_2025_2511_1820_1826_2497_7.3519_PLA2	27	Y	B	0.077	0.021	0.451	0.528	0.480444
N.melanoleuca_1933_1786_1808_2025_2511_1820_1826_2497_7.3519_PLA2	28	C	B	0.021	0.022	0.359	0.619	0.482333
N.melanoleuca_1933_1786_1808_2025_2511_1820_1826_2497_7.3519_PLA2	29	G	B	0.086	0.02	0.205	0.775	0.509
N.melanoleuca_1933_1786_1808_2025_2511_1820_1826_2497_7.3519_PLA2	30	R	E	0.333	0.018	0.088	0.893	0.539556
N.melanoleuca_1933_1786_1808_2025_2511_1820_1826_2497_7.3519_PLA2	31	G	E	0.401	0.018	0.047	0.935	0.571333
N.melanoleuca_1933_1786_1808_2025_2511_1820_1826_2497_7.3519_PLA2	32	G	B	0.303	0.018	0.019	0.964	0.584111
N.melanoleuca_1933_1786_1808_2025_2511_1820_1826_2497_7.3519_PLA2	33	S	E	0.562	0.018	0.047	0.935	0.601222
N.melanoleuca_1933_1786_1808_2025_2511_1820_1826_2497_7.3519_PLA2	34	G	E	0.477	0.018	0.019	0.964	0.63
N.melanoleuca_1933_1786_1808_2025_2511_1820_1826_2497_7.3519_PLA2	35	T	E	0.45	0.018	0.019	0.964	0.639667
N.melanoleuca_1933_1786_1808_2025_2511_1820_1826_2497_7.3519_PLA2	36	P	E	0.3	0.018	0.047	0.935	0.626222
N.melanoleuca_1933_1786_1808_2025_2511_1820_1826_2497_7.3519_PLA2	37	V	E	0.396	0.053	0.043	0.903	0.626333
N.melanoleuca_1933_1786_1808_2025_2511_1820_1826_2497_7.3519_PLA2	38	D	E	0.468	0.018	0.019	0.964	0.603
N.melanoleuca_1933_1786_1808_2025_2511_1820_1826_2497_7.3519_PLA2	39	D	E	0.53	0.058	0.017	0.925	0.571667
N.melanoleuca_1933_1786_1808_2025_2511_1820_1826_2497_7.3519_PLA2	40	L	E	0.29	0.115	0.016	0.868	0.545444
N.melanoleuca_1933_1786_1808_2025_2511_1820_1826_2497_7.3519_PLA2	41	D	E	0.399	0.115	0.016	0.868	0.537444
N.melanoleuca_1933_1786_1808_2025_2511_1820_1826_2497_7.3519_PLA2	42	R	E	0.33	0.268	0.043	0.689	0.537111
N.melanoleuca_1933_1786_1808_2025_2511_1820_1826_2497_7.3519_PLA2	43	C	B	0.025	0.502	0.102	0.396	0.521889
N.melanoleuca_1933_1786_1808_2025_2511_1820_1826_2497_7.3519_PLA2	44	C	B	0.055	0.538	0.173	0.289	0.507
N.melanoleuca_1933_1786_1808_2025_2511_1820_1826_2497_7.3519_PLA2	45	Q	E	0.425	0.502	0.102	0.396	0.507333
N.melanoleuca_1933_1786_1808_2025_2511_1820_1826_2497_7.3519_PLA2	46	I	E	0.404	0.278	0.093	0.628	0.489444
N.melanoleuca_1933_1786_1808_2025_2511_1820_1826_2497_7.3519_PLA2	47	H	B	0.148	0.113	0.043	0.844	0.483
N.melanoleuca_1933_1786_1808_2025_2511_1820_1826_2497_7.3519_PLA2	48	D	E	0.55	0.058	0.017	0.925	0.484556
N.melanoleuca_1933_1786_1808_2025_2511_1820_1826_2497_7.3519_PLA2	49	N	B	0.251	0.257	0.016	0.727	0.484333
N.melanoleuca_1933_1786_1808_2025_2511_1820_1826_2497_7.3519_PLA2	50	C	B	0.051	0.43	0.016	0.555	0.468889
N.melanoleuca_1933_1786_1808_2025_2511_1820_1826_2497_7.3519_PLA2	51	Y	B	0.12	0.717	0.014	0.269	0.477778
N.melanoleuca_1933_1786_1808_2025_2511_1820_1826_2497_7.3519_PLA2	52	G	E	0.534	0.802	0.014	0.185	0.472778
N.melanoleuca_1933_1786_1808_2025_2511_1820_1826_2497_7.3519_PLA2	53	E	E	0.442	0.802	0.014	0.185	0.473333
N.melanoleuca_1933_1786_1808_2025_2511_1820_1826_2497_7.3519_PLA2	54	A	B	0.061	0.694	0.003	0.303	0.479667
N.melanoleuca_1933_1786_1808_2025_2511_1820_1826_2497_7.3519_PLA2	55	E	E	0.519	0.717	0.014	0.269	0.496444
N.melanoleuca_1933_1786_1808_2025_2511_1820_1826_2497_7.3519_PLA2	56	K	E	0.709	0.522	0.016	0.462	0.498778
N.melanoleuca_1933_1786_1808_2025_2511_1820_1826_2497_7.3519_PLA2	57	I	B	0.232	0.257	0.016	0.727	0.515333
N.melanoleuca_1933_1786_1808_2025_2511_1820_1826_2497_7.3519_PLA2	58	S	E	0.624	0.053	0.005	0.942	0.523222
N.melanoleuca_1933_1786_1808_2025_2511_1820_1826_2497_7.3519_PLA2	59	G	E	0.521	0.018	0.019	0.964	0.543222
N.melanoleuca_1933_1786_1808_2025_2511_1820_1826_2497_7.3519_PLA2	60	C	B	0.056	0.018	0.047	0.935	0.530667
N.melanoleuca_1933_1786_1808_2025_2511_1820_1826_2497_7.3519_PLA2	61	W	E	0.325	0.018	0.088	0.893	0.539222
N.melanoleuca_1933_1786_1808_2025_2511_1820_1826_2497_7.3519_PLA2	62	P	B	0.349	0.005	0.262	0.733	0.529778
N.melanoleuca_1933_1786_1808_2025_2511_1820_1826_2497_7.3519_PLA2	63	Y	E	0.383	0.004	0.42	0.576	0.515667
N.melanoleuca_1933_1786_1808_2025_2511_1820_1826_2497_7.3519_PLA2	64	I	B	0.203	0.004	0.616	0.381	0.500667
N.melanoleuca_1933_1786_1808_2025_2511_1820_1826_2497_7.3519_PLA2	65	K	E	0.371	0.004	0.514	0.481	0.499444
N.melanoleuca_1933_1786_1808_2025_2511_1820_1826_2497_7.3519_PLA2	66	T	E	0.375	0.004	0.616	0.381	0.479556
N.melanoleuca_1933_1786_1808_2025_2511_1820_1826_2497_7.3519_PLA2	67	Y	B	0.095	0.003	0.718	0.279	0.468667
N.melanoleuca_1933_1786_1808_2025_2511_1820_1826_2497_7.3519_PLA2	68	T	E	0.403	0.002	0.816	0.182	0.468111
N.melanoleuca_1933_1786_1808_2025_2511_1820_1826_2497_7.3519_PLA2	69	Y	B	0.094	0.001	0.9	0.099	0.47
N.melanoleuca_1933_1786_1808_2025_2511_1820_1826_2497_7.3519_PLA2	70	D	E	0.386	0.011	0.918	0.071	0.465889
N.melanoleuca_1933_1786_1808_2025_2511_1820_1826_2497_7.3519_PLA2	71	S	B	0.131	0.001	0.9	0.099	0.473111
N.melanoleuca_1933_1786_1808_2025_2511_1820_1826_2497_7.3519_PLA2	72	C	E	0.418	0.004	0.616	0.381	0.481556
N.melanoleuca_1933_1786_1808_2025_2511_1820_1826_2497_7.3519_PLA2	73	Q	E	0.696	0.004	0.085	0.91	0.492111
N.melanoleuca_1933_1786_1808_2025_2511_1820_1826_2497_7.3519_PLA2	74	G	E	0.754	0.003	0.003	0.994	0.489111
N.melanoleuca_1933_1786_1808_2025_2511_1820_1826_2497_7.3519_PLA2	75	T	E	0.58	0.004	0.138	0.858	0.496778
N.melanoleuca_1933_1786_1808_2025_2511_1820_1826_2497_7.3519_PLA2	76	L	B	0.183	0.004	0.616	0.381	0.517222
N.melanoleuca_1933_1786_1808_2025_2511_1820_1826_2497_7.3519_PLA2	77	T	E	0.276	0.002	0.816	0.182	0.517778
N.melanoleuca_1933_1786_1808_2025_2511_1820_1826_2497_7.3519_PLA2	78	S	E	0.266	0.003	0.718	0.279	0.518222
N.melanoleuca_1933_1786_1808_2025_2511_1820_1826_2497_7.3519_PLA2	79	C	B	0.235	0.004	0.42	0.576	0.517444
N.melanoleuca_1933_1786_1808_2025_2511_1820_1826_2497_7.3519_PLA2	80	G	E	0.65	0.005	0.045	0.951	0.517778
N.melanoleuca_1933_1786_1808_2025_2511_1820_1826_2497_7.3519_PLA2	81	A	E	0.708	0.003	0.003	0.994	0.501333
N.melanoleuca_1933_1786_1808_2025_2511_1820_1826_2497_7.3519_PLA2	82	A	E	0.65	0.016	0.005	0.979	0.494556
N.melanoleuca_1933_1786_1808_2025_2511_1820_1826_2497_7.3519_PLA2	83	N	E	0.497	0.109	0.005	0.886	0.495333
N.melanoleuca_1933_1786_1808_2025_2511_1820_1826_2497_7.3519_PLA2	84	N	E	0.427	0.782	0.003	0.216	0.486889
N.melanoleuca_1933_1786_1808_2025_2511_1820_1826_2497_7.3519_PLA2	85	C	B	0.036	0.782	0.003	0.216	0.469333
N.melanoleuca_1933_1786_1808_2025_2511_1820_1826_2497_7.3519_PLA2	86	A	E	0.276	0.858	0.002	0.139	0.455667
N.melanoleuca_1933_1786_1808_2025_2511_1820_1826_2497_7.3519_PLA2	87	A	E	0.523	0.879	0.01	0.111	0.451333
N.melanoleuca_1933_1786_1808_2025_2511_1820_1826_2497_7.3519_PLA2	88	S	B	0.289	0.879	0.01	0.111	0.426778
N.melanoleuca_1933_1786_1808_2025_2511_1820_1826_2497_7.3519_PLA2	89	V	B	0.152	0.802	0.014	0.185	0.424222
N.melanoleuca_1933_1786_1808_2025_2511_1820_1826_2497_7.3519_PLA2	90	C	B	0.076	0.717	0.014	0.269	0.442222
N.melanoleuca_1933_1786_1808_2025_2511_1820_1826_2497_7.3519_PLA2	91	D	E	0.527	0.782	0.003	0.216	0.448667
N.melanoleuca_1933_1786_1808_2025_2511_1820_1826_2497_7.3519_PLA2	92	C	B	0.059	0.6	0.003	0.397	0.436
N.melanoleuca_1933_1786_1808_2025_2511_1820_1826_2497_7.3519_PLA2	93	D	B	0.191	0.694	0.003	0.303	0.424778
N.melanoleuca_1933_1786_1808_2025_2511_1820_1826_2497_7.3519_PLA2	94	R	E	0.388	0.97	0.001	0.03	0.423
N.melanoleuca_1933_1786_1808_2025_2511_1820_1826_2497_7.3519_PLA2	95	V	B	0.315	0.97	0.001	0.03	0.410667
N.melanoleuca_1933_1786_1808_2025_2511_1820_1826_2497_7.3519_PLA2	96	A	B	0.037	0.988	0	0.012	0.398
N.melanoleuca_1933_1786_1808_2025_2511_1820_1826_2497_7.3519_PLA2	97	A	B	0.043	0.97	0.001	0.03	0.412889
N.melanoleuca_1933_1786_1808_2025_2511_1820_1826_2497_7.3519_PLA2	98	N	E	0.315	0.97	0.001	0.03	0.424333
N.melanoleuca_1933_1786_1808_2025_2511_1820_1826_2497_7.3519_PLA2	99	C	B	0.024	0.923	0.002	0.076	0.421
N.melanoleuca_1933_1786_1808_2025_2511_1820_1826_2497_7.3519_PLA2	100	F	B	0.058	0.858	0.002	0.139	0.427556
N.melanoleuca_1933_1786_1808_2025_2511_1820_1826_2497_7.3519_PLA2	101	A	E	0.325	0.694	0.003	0.303	0.455222
N.melanoleuca_1933_1786_1808_2025_2511_1820_1826_2497_7.3519_PLA2	102	R	E	0.588	0.502	0.002	0.495	0.480667
N.melanoleuca_1933_1786_1808_2025_2511_1820_1826_2497_7.3519_PLA2	103	A	B	0.14	0.109	0.005	0.886	0.503222
N.melanoleuca_1933_1786_1808_2025_2511_1820_1826_2497_7.3519_PLA2	104	P	E	0.512	0.058	0.017	0.925	0.540444
N.melanoleuca_1933_1786_1808_2025_2511_1820_1826_2497_7.3519_PLA2	105	Y	B	0.218	0.018	0.047	0.935	0.559222
N.melanoleuca_1933_1786_1808_2025_2511_1820_1826_2497_7.3519_PLA2	106	I	B	0.245	0.053	0.043	0.903	0.573333
N.melanoleuca_1933_1786_1808_2025_2511_1820_1826_2497_7.3519_PLA2	107	D	E	0.481	0.181	0.016	0.803	0.577333
N.melanoleuca_1933_1786_1808_2025_2511_1820_1826_2497_7.3519_PLA2	108	K	E	0.639	0.257	0.016	0.727	0.583333
N.melanoleuca_1933_1786_1808_2025_2511_1820_1826_2497_7.3519_PLA2	109	N	E	0.365	0.257	0.016	0.727	0.577444
N.melanoleuca_1933_1786_1808_2025_2511_1820_1826_2497_7.3519_PLA2	110	Y	B	0.195	0.181	0.016	0.803	0.579667
N.melanoleuca_1933_1786_1808_2025_2511_1820_1826_2497_7.3519_PLA2	111	N	E	0.496	0.113	0.043	0.844	0.580667
N.melanoleuca_1933_1786_1808_2025_2511_1820_1826_2497_7.3519_PLA2	112	I	B	0.188	0.053	0.043	0.903	0.568222
N.melanoleuca_1933_1786_1808_2025_2511_1820_1826_2497_7.3519_PLA2	113	D	E	0.375	0.018	0.019	0.964	0.558778
N.melanoleuca_1933_1786_1808_2025_2511_1820_1826_2497_7.3519_PLA2	114	F	E	0.52	0.016	0.005	0.979	0.546556
N.melanoleuca_1933_1786_1808_2025_2511_1820_1826_2497_7.3519_PLA2	115	N	E	0.597	0.058	0.017	0.925	0.545
N.melanoleuca_1933_1786_1808_2025_2511_1820_1826_2497_7.3519_PLA2	116	A	E	0.446	0.018	0.019	0.964	0.475333
N.melanoleuca_1933_1786_1808_2025_2511_1820_1826_2497_7.3519_PLA2	117	R	E	0.423	0.058	0.017	0.925	0.413111
N.melanoleuca_1933_1786_1808_2025_2511_1820_1826_2497_7.3519_PLA2	118	C	B	0.075	0.018	0.019	0.964	0.354778
N.melanoleuca_1933_1786_1808_2025_2511_1820_1826_2497_7.3519_PLA2	119	Q	E	0.722	0.003	0.003	0.994	0.288667
N.melanoleuca_2641_1713_1779_2166_1748_2417_1706_2264_2895_2976_2.0218_PLA2	1	L	E	0.487	0.003	0.003	0.994	0.259778
N.melanoleuca_2641_1713_1779_2166_1748_2417_1706_2264_2895_2976_2.0218_PLA2	2	N	E	0.346	0.113	0.043	0.844	0.303667
N.melanoleuca_2641_1713_1779_2166_1748_2417_1706_2264_2895_2976_2.0218_PLA2	3	L	B	0.217	0.879	0.01	0.111	0.370333
N.melanoleuca_2641_1713_1779_2166_1748_2417_1706_2264_2895_2976_2.0218_PLA2	4	Y	E	0.246	0.879	0.01	0.111	0.422778
N.melanoleuca_2641_1713_1779_2166_1748_2417_1706_2264_2895_2976_2.0218_PLA2	5	Q	B	0.257	0.879	0.01	0.111	0.460667
N.melanoleuca_2641_1713_1779_2166_1748_2417_1706_2264_2895_2976_2.0218_PLA2	6	F	B	0.06	0.938	0.007	0.055	0.462
N.melanoleuca_2641_1713_1779_2166_1748_2417_1706_2264_2895_2976_2.0218_PLA2	7	K	B	0.242	0.923	0.002	0.076	0.479222
N.melanoleuca_2641_1713_1779_2166_1748_2417_1706_2264_2895_2976_2.0218_PLA2	8	N	E	0.342	0.923	0.002	0.076	0.472667
N.melanoleuca_2641_1713_1779_2166_1748_2417_1706_2264_2895_2976_2.0218_PLA2	9	M	B	0.053	0.923	0.002	0.076	0.464667
N.melanoleuca_2641_1713_1779_2166_1748_2417_1706_2264_2895_2976_2.0218_PLA2	10	I	B	0.037	0.938	0.007	0.055	0.437
N.melanoleuca_2641_1713_1779_2166_1748_2417_1706_2264_2895_2976_2.0218_PLA2	11	Q	E	0.337	0.938	0.007	0.055	0.462
N.melanoleuca_2641_1713_1779_2166_1748_2417_1706_2264_2895_2976_2.0218_PLA2	12	C	B	0.171	0.879	0.01	0.111	0.456889
N.melanoleuca_2641_1713_1779_2166_1748_2417_1706_2264_2895_2976_2.0218_PLA2	13	T	B	0.153	0.717	0.014	0.269	0.471
N.melanoleuca_2641_1713_1779_2166_1748_2417_1706_2264_2895_2976_2.0218_PLA2	14	V	B	0.101	0.339	0.016	0.645	0.491778
N.melanoleuca_2641_1713_1779_2166_1748_2417_1706_2264_2895_2976_2.0218_PLA2	15	P	E	0.387	0.115	0.016	0.868	0.508
N.melanoleuca_2641_1713_1779_2166_1748_2417_1706_2264_2895_2976_2.0218_PLA2	16	N	E	0.645	0.018	0.019	0.964	0.509667
N.melanoleuca_2641_1713_1779_2166_1748_2417_1706_2264_2895_2976_2.0218_PLA2	17	R	B	0.278	0.018	0.019	0.964	0.520556
N.melanoleuca_2641_1713_1779_2166_1748_2417_1706_2264_2895_2976_2.0218_PLA2	18	S	B	0.138	0.016	0.005	0.979	0.524
N.melanoleuca_2641_1713_1779_2166_1748_2417_1706_2264_2895_2976_2.0218_PLA2	19	W	B	0.121	0.184	0.043	0.773	0.54
N.melanoleuca_2641_1713_1779_2166_1748_2417_1706_2264_2895_2976_2.0218_PLA2	20	W	B	0.265	0.191	0.086	0.723	0.530556
N.melanoleuca_2641_1713_1779_2166_1748_2417_1706_2264_2895_2976_2.0218_PLA2	21	H	E	0.302	0.199	0.152	0.649	0.522667
N.melanoleuca_2641_1713_1779_2166_1748_2417_1706_2264_2895_2976_2.0218_PLA2	22	F	B	0.078	0.216	0.235	0.548	0.507111
N.melanoleuca_2641_1713_1779_2166_1748_2417_1706_2264_2895_2976_2.0218_PLA2	23	A	B	0.237	0.125	0.227	0.648	0.491333
N.melanoleuca_2641_1713_1779_2166_1748_2417_1706_2264_2895_2976_2.0218_PLA2	24	D	B	0.226	0.064	0.216	0.721	0.491667
N.melanoleuca_2641_1713_1779_2166_1748_2417_1706_2264_2895_2976_2.0218_PLA2	25	Y	B	0.047	0.064	0.216	0.721	0.472889
N.melanoleuca_2641_1713_1779_2166_1748_2417_1706_2264_2895_2976_2.0218_PLA2	26	G	B	0.03	0.02	0.205	0.775	0.456778
N.melanoleuca_2641_1713_1779_2166_1748_2417_1706_2264_2895_2976_2.0218_PLA2	27	C	B	0.029	0.022	0.359	0.619	0.465556
N.melanoleuca_2641_1713_1779_2166_1748_2417_1706_2264_2895_2976_2.0218_PLA2	28	Y	B	0.072	0.069	0.386	0.545	0.472
N.melanoleuca_2641_1713_1779_2166_1748_2417_1706_2264_2895_2976_2.0218_PLA2	29	C	B	0.03	0.064	0.216	0.721	0.470556
N.melanoleuca_2641_1713_1779_2166_1748_2417_1706_2264_2895_2976_2.0218_PLA2	30	G	B	0.087	0.019	0.141	0.84	0.494222
N.melanoleuca_2641_1713_1779_2166_1748_2417_1706_2264_2895_2976_2.0218_PLA2	31	R	E	0.307	0.018	0.047	0.935	0.519444
N.melanoleuca_2641_1713_1779_2166_1748_2417_1706_2264_2895_2976_2.0218_PLA2	32	G	E	0.302	0.018	0.019	0.964	0.552111
N.melanoleuca_2641_1713_1779_2166_1748_2417_1706_2264_2895_2976_2.0218_PLA2	33	G	B	0.259	0.018	0.047	0.935	0.566667
N.melanoleuca_2641_1713_1779_2166_1748_2417_1706_2264_2895_2976_2.0218_PLA2	34	S	E	0.56	0.018	0.088	0.893	0.583778
N.melanoleuca_2641_1713_1779_2166_1748_2417_1706_2264_2895_2976_2.0218_PLA2	35	G	E	0.377	0.018	0.047	0.935	0.611
N.melanoleuca_2641_1713_1779_2166_1748_2417_1706_2264_2895_2976_2.0218_PLA2	36	T	E	0.446	0.005	0.045	0.951	0.623667
N.melanoleuca_2641_1713_1779_2166_1748_2417_1706_2264_2895_2976_2.0218_PLA2	37	P	E	0.389	0.018	0.047	0.935	0.619222
N.melanoleuca_2641_1713_1779_2166_1748_2417_1706_2264_2895_2976_2.0218_PLA2	38	V	E	0.476	0.018	0.047	0.935	0.620889
N.melanoleuca_2641_1713_1779_2166_1748_2417_1706_2264_2895_2976_2.0218_PLA2	39	D	E	0.338	0.018	0.088	0.893	0.607111
N.melanoleuca_2641_1713_1779_2166_1748_2417_1706_2264_2895_2976_2.0218_PLA2	40	D	E	0.536	0.052	0.084	0.864	0.582333
N.melanoleuca_2641_1713_1779_2166_1748_2417_1706_2264_2895_2976_2.0218_PLA2	41	L	E	0.335	0.052	0.084	0.864	0.563889
N.melanoleuca_2641_1713_1779_2166_1748_2417_1706_2264_2895_2976_2.0218_PLA2	42	D	B	0.269	0.052	0.084	0.864	0.559556
N.melanoleuca_2641_1713_1779_2166_1748_2417_1706_2264_2895_2976_2.0218_PLA2	43	R	E	0.294	0.113	0.087	0.8	0.561111
N.melanoleuca_2641_1713_1779_2166_1748_2417_1706_2264_2895_2976_2.0218_PLA2	44	C	B	0.042	0.199	0.152	0.649	0.550778
N.melanoleuca_2641_1713_1779_2166_1748_2417_1706_2264_2895_2976_2.0218_PLA2	45	C	B	0.058	0.125	0.227	0.648	0.533778
N.melanoleuca_2641_1713_1779_2166_1748_2417_1706_2264_2895_2976_2.0218_PLA2	46	Q	E	0.353	0.125	0.227	0.648	0.531667
N.melanoleuca_2641_1713_1779_2166_1748_2417_1706_2264_2895_2976_2.0218_PLA2	47	I	E	0.417	0.052	0.084	0.864	0.518444
N.melanoleuca_2641_1713_1779_2166_1748_2417_1706_2264_2895_2976_2.0218_PLA2	48	H	B	0.197	0.018	0.047	0.935	0.504111
N.melanoleuca_2641_1713_1779_2166_1748_2417_1706_2264_2895_2976_2.0218_PLA2	49	D	E	0.518	0.058	0.017	0.925	0.504778
N.melanoleuca_2641_1713_1779_2166_1748_2417_1706_2264_2895_2976_2.0218_PLA2	50	N	B	0.181	0.181	0.016	0.803	0.494889
N.melanoleuca_2641_1713_1779_2166_1748_2417_1706_2264_2895_2976_2.0218_PLA2	51	C	B	0.037	0.43	0.016	0.555	0.473222
N.melanoleuca_2641_1713_1779_2166_1748_2417_1706_2264_2895_2976_2.0218_PLA2	52	Y	B	0.112	0.802	0.014	0.185	0.476333
N.melanoleuca_2641_1713_1779_2166_1748_2417_1706_2264_2895_2976_2.0218_PLA2	53	G	E	0.531	0.802	0.014	0.185	0.468
N.melanoleuca_2641_1713_1779_2166_1748_2417_1706_2264_2895_2976_2.0218_PLA2	54	E	E	0.433	0.802	0.014	0.185	0.466889
N.melanoleuca_2641_1713_1779_2166_1748_2417_1706_2264_2895_2976_2.0218_PLA2	55	A	B	0.053	0.694	0.003	0.303	0.466667
N.melanoleuca_2641_1713_1779_2166_1748_2417_1706_2264_2895_2976_2.0218_PLA2	56	E	E	0.535	0.622	0.015	0.363	0.480667
N.melanoleuca_2641_1713_1779_2166_1748_2417_1706_2264_2895_2976_2.0218_PLA2	57	K	E	0.748	0.522	0.016	0.462	0.482889
N.melanoleuca_2641_1713_1779_2166_1748_2417_1706_2264_2895_2976_2.0218_PLA2	58	I	B	0.218	0.181	0.016	0.803	0.497333
N.melanoleuca_2641_1713_1779_2166_1748_2417_1706_2264_2895_2976_2.0218_PLA2	59	S	E	0.653	0.016	0.005	0.979	0.507222
N.melanoleuca_2641_1713_1779_2166_1748_2417_1706_2264_2895_2976_2.0218_PLA2	60	G	E	0.504	0.018	0.019	0.964	0.526111
N.melanoleuca_2641_1713_1779_2166_1748_2417_1706_2264_2895_2976_2.0218_PLA2	61	C	B	0.071	0.018	0.047	0.935	0.516778
N.melanoleuca_2641_1713_1779_2166_1748_2417_1706_2264_2895_2976_2.0218_PLA2	62	W	E	0.311	0.018	0.088	0.893	0.528
N.melanoleuca_2641_1713_1779_2166_1748_2417_1706_2264_2895_2976_2.0218_PLA2	63	P	E	0.365	0.004	0.197	0.799	0.522667
N.melanoleuca_2641_1713_1779_2166_1748_2417_1706_2264_2895_2976_2.0218_PLA2	64	Y	E	0.333	0.005	0.336	0.66	0.509556
N.melanoleuca_2641_1713_1779_2166_1748_2417_1706_2264_2895_2976_2.0218_PLA2	65	I	B	0.185	0.004	0.514	0.481	0.499778
N.melanoleuca_2641_1713_1779_2166_1748_2417_1706_2264_2895_2976_2.0218_PLA2	66	K	E	0.397	0.004	0.42	0.576	0.489333
N.melanoleuca_2641_1713_1779_2166_1748_2417_1706_2264_2895_2976_2.0218_PLA2	67	T	E	0.415	0.004	0.514	0.481	0.464889
N.melanoleuca_2641_1713_1779_2166_1748_2417_1706_2264_2895_2976_2.0218_PLA2	68	Y	B	0.086	0.004	0.616	0.381	0.449111
N.melanoleuca_2641_1713_1779_2166_1748_2417_1706_2264_2895_2976_2.0218_PLA2	69	T	E	0.467	0.002	0.816	0.182	0.440333
N.melanoleuca_2641_1713_1779_2166_1748_2417_1706_2264_2895_2976_2.0218_PLA2	70	Y	B	0.091	0.001	0.9	0.099	0.435778
N.melanoleuca_2641_1713_1779_2166_1748_2417_1706_2264_2895_2976_2.0218_PLA2	71	E	E	0.427	0.011	0.918	0.071	0.428333
N.melanoleuca_2641_1713_1779_2166_1748_2417_1706_2264_2895_2976_2.0218_PLA2	72	C	B	0.137	0.001	0.9	0.099	0.422778
N.melanoleuca_2641_1713_1779_2166_1748_2417_1706_2264_2895_2976_2.0218_PLA2	73	S	E	0.566	0.002	0.816	0.182	0.416444
N.melanoleuca_2641_1713_1779_2166_1748_2417_1706_2264_2895_2976_2.0218_PLA2	74	Q	E	0.726	0.005	0.045	0.951	0.415
N.melanoleuca_2641_1713_1779_2166_1748_2417_1706_2264_2895_2976_2.0218_PLA2	75	G	E	0.449	0.005	0.015	0.979	0.402778
N.melanoleuca_2641_1713_1779_2166_1748_2417_1706_2264_2895_2976_2.0218_PLA2	76	T	E	0.543	0.004	0.616	0.381	0.412444
N.melanoleuca_2641_1713_1779_2166_1748_2417_1706_2264_2895_2976_2.0218_PLA2	77	L	B	0.057	0.001	0.9	0.099	0.426778
N.melanoleuca_2641_1713_1779_2166_1748_2417_1706_2264_2895_2976_2.0218_PLA2	78	T	E	0.37	0.001	0.959	0.04	0.441
N.melanoleuca_2641_1713_1779_2166_1748_2417_1706_2264_2895_2976_2.0218_PLA2	79	C	B	0.028	0.001	0.9	0.099	0.45
N.melanoleuca_2641_1713_1779_2166_1748_2417_1706_2264_2895_2976_2.0218_PLA2	80	S	E	0.449	0.005	0.336	0.66	0.452889
N.melanoleuca_2641_1713_1779_2166_1748_2417_1706_2264_2895_2976_2.0218_PLA2	81	G	E	0.623	0.005	0.045	0.951	0.463889
N.melanoleuca_2641_1713_1779_2166_1748_2417_1706_2264_2895_2976_2.0218_PLA2	82	A	E	0.699	0.003	0.003	0.994	0.468444
N.melanoleuca_2641_1713_1779_2166_1748_2417_1706_2264_2895_2976_2.0218_PLA2	83	N	E	0.665	0.016	0.005	0.979	0.474667
N.melanoleuca_2641_1713_1779_2166_1748_2417_1706_2264_2895_2976_2.0218_PLA2	84	D	E	0.517	0.246	0.004	0.75	0.492889
N.melanoleuca_2641_1713_1779_2166_1748_2417_1706_2264_2895_2976_2.0218_PLA2	85	K	E	0.431	0.782	0.003	0.216	0.484444
N.melanoleuca_2641_1713_1779_2166_1748_2417_1706_2264_2895_2976_2.0218_PLA2	86	C	B	0.039	0.858	0.002	0.139	0.472778
N.melanoleuca_2641_1713_1779_2166_1748_2417_1706_2264_2895_2976_2.0218_PLA2	87	A	B	0.23	0.858	0.002	0.139	0.454111
N.melanoleuca_2641_1713_1779_2166_1748_2417_1706_2264_2895_2976_2.0218_PLA2	88	A	E	0.503	0.938	0.007	0.055	0.449444
N.melanoleuca_2641_1713_1779_2166_1748_2417_1706_2264_2895_2976_2.0218_PLA2	89	S	B	0.252	0.923	0.002	0.076	0.420778
N.melanoleuca_2641_1713_1779_2166_1748_2417_1706_2264_2895_2976_2.0218_PLA2	90	V	B	0.105	0.923	0.002	0.076	0.413222
N.melanoleuca_2641_1713_1779_2166_1748_2417_1706_2264_2895_2976_2.0218_PLA2	91	C	B	0.073	0.858	0.002	0.139	0.427111
N.melanoleuca_2641_1713_1779_2166_1748_2417_1706_2264_2895_2976_2.0218_PLA2	92	D	E	0.47	0.923	0.002	0.076	0.426556
N.melanoleuca_2641_1713_1779_2166_1748_2417_1706_2264_2895_2976_2.0218_PLA2	93	C	B	0.039	0.858	0.002	0.139	0.414889
N.melanoleuca_2641_1713_1779_2166_1748_2417_1706_2264_2895_2976_2.0218_PLA2	94	D	B	0.128	0.923	0.002	0.076	0.406333
N.melanoleuca_2641_1713_1779_2166_1748_2417_1706_2264_2895_2976_2.0218_PLA2	95	R	E	0.384	0.988	0	0.012	0.410556
N.melanoleuca_2641_1713_1779_2166_1748_2417_1706_2264_2895_2976_2.0218_PLA2	96	V	B	0.243	0.988	0	0.012	0.399556
N.melanoleuca_2641_1713_1779_2166_1748_2417_1706_2264_2895_2976_2.0218_PLA2	97	A	B	0.029	0.988	0	0.012	0.385556
N.melanoleuca_2641_1713_1779_2166_1748_2417_1706_2264_2895_2976_2.0218_PLA2	98	A	B	0.041	0.988	0	0.012	0.403778
N.melanoleuca_2641_1713_1779_2166_1748_2417_1706_2264_2895_2976_2.0218_PLA2	99	N	E	0.296	0.97	0.001	0.03	0.420444
N.melanoleuca_2641_1713_1779_2166_1748_2417_1706_2264_2895_2976_2.0218_PLA2	100	C	B	0.022	0.97	0.001	0.03	0.419333
N.melanoleuca_2641_1713_1779_2166_1748_2417_1706_2264_2895_2976_2.0218_PLA2	101	F	B	0.067	0.923	0.002	0.076	0.428222
N.melanoleuca_2641_1713_1779_2166_1748_2417_1706_2264_2895_2976_2.0218_PLA2	102	A	E	0.338	0.694	0.003	0.303	0.455889
N.melanoleuca_2641_1713_1779_2166_1748_2417_1706_2264_2895_2976_2.0218_PLA2	103	R	E	0.602	0.502	0.002	0.495	0.479667
N.melanoleuca_2641_1713_1779_2166_1748_2417_1706_2264_2895_2976_2.0218_PLA2	104	A	B	0.131	0.109	0.005	0.886	0.501556
N.melanoleuca_2641_1713_1779_2166_1748_2417_1706_2264_2895_2976_2.0218_PLA2	105	P	E	0.537	0.058	0.017	0.925	0.539111
N.melanoleuca_2641_1713_1779_2166_1748_2417_1706_2264_2895_2976_2.0218_PLA2	106	Y	B	0.226	0.018	0.047	0.935	0.557778
N.melanoleuca_2641_1713_1779_2166_1748_2417_1706_2264_2895_2976_2.0218_PLA2	107	I	B	0.237	0.053	0.043	0.903	0.570333
N.melanoleuca_2641_1713_1779_2166_1748_2417_1706_2264_2895_2976_2.0218_PLA2	108	D	E	0.516	0.268	0.043	0.689	0.574111
N.melanoleuca_2641_1713_1779_2166_1748_2417_1706_2264_2895_2976_2.0218_PLA2	109	K	E	0.633	0.339	0.016	0.645	0.580333
N.melanoleuca_2641_1713_1779_2166_1748_2417_1706_2264_2895_2976_2.0218_PLA2	110	N	E	0.351	0.257	0.016	0.727	0.575111
N.melanoleuca_2641_1713_1779_2166_1748_2417_1706_2264_2895_2976_2.0218_PLA2	111	Y	B	0.196	0.257	0.016	0.727	0.578889
N.melanoleuca_2641_1713_1779_2166_1748_2417_1706_2264_2895_2976_2.0218_PLA2	112	N	E	0.508	0.113	0.043	0.844	0.582889
N.melanoleuca_2641_1713_1779_2166_1748_2417_1706_2264_2895_2976_2.0218_PLA2	113	I	B	0.185	0.053	0.043	0.903	0.57
N.melanoleuca_2641_1713_1779_2166_1748_2417_1706_2264_2895_2976_2.0218_PLA2	114	D	E	0.389	0.018	0.019	0.964	0.559778
N.melanoleuca_2641_1713_1779_2166_1748_2417_1706_2264_2895_2976_2.0218_PLA2	115	F	E	0.507	0.016	0.005	0.979	0.547
N.melanoleuca_2641_1713_1779_2166_1748_2417_1706_2264_2895_2976_2.0218_PLA2	116	N	E	0.594	0.053	0.005	0.942	0.545222
N.melanoleuca_2641_1713_1779_2166_1748_2417_1706_2264_2895_2976_2.0218_PLA2	117	A	E	0.47	0.058	0.017	0.925	0.475556
N.melanoleuca_2641_1713_1779_2166_1748_2417_1706_2264_2895_2976_2.0218_PLA2	118	R	E	0.42	0.058	0.017	0.925	0.414
N.melanoleuca_2641_1713_1779_2166_1748_2417_1706_2264_2895_2976_2.0218_PLA2	119	C	B	0.076	0.018	0.019	0.964	0.355444
N.melanoleuca_2641_1713_1779_2166_1748_2417_1706_2264_2895_2976_2.0218_PLA2	120	Q	E	0.726	0.003	0.003	0.994	0.288667
N.melanoleuca_2841_1526_1716_0.7434_PLA2	1	N	E	0.78	0.003	0.003	0.994	0.249667
N.melanoleuca_2841_1526_1716_0.7434_PLA2	2	L	E	0.275	0.694	0.003	0.303	0.315
N.melanoleuca_2841_1526_1716_0.7434_PLA2	3	Y	E	0.28	0.802	0.014	0.185	0.367889
N.melanoleuca_2841_1526_1716_0.7434_PLA2	4	Q	E	0.305	0.879	0.01	0.111	0.404444
N.melanoleuca_2841_1526_1716_0.7434_PLA2	5	F	B	0.055	0.938	0.007	0.055	0.438889
N.melanoleuca_2841_1526_1716_0.7434_PLA2	6	K	B	0.247	0.938	0.007	0.055	0.464222
N.melanoleuca_2841_1526_1716_0.7434_PLA2	7	N	E	0.398	0.938	0.007	0.055	0.461333
N.melanoleuca_2841_1526_1716_0.7434_PLA2	8	M	B	0.061	0.97	0.001	0.03	0.448556
N.melanoleuca_2841_1526_1716_0.7434_PLA2	9	I	B	0.031	0.975	0.003	0.022	0.426333
N.melanoleuca_2841_1526_1716_0.7434_PLA2	10	H	E	0.339	0.938	0.007	0.055	0.447889
N.melanoleuca_2841_1526_1716_0.7434_PLA2	11	C	B	0.185	0.879	0.01	0.111	0.439889
N.melanoleuca_2841_1526_1716_0.7434_PLA2	12	T	B	0.128	0.802	0.014	0.185	0.449222
N.melanoleuca_2841_1526_1716_0.7434_PLA2	13	V	B	0.099	0.339	0.016	0.645	0.47
N.melanoleuca_2841_1526_1716_0.7434_PLA2	14	P	E	0.476	0.058	0.017	0.925	0.486556
N.melanoleuca_2841_1526_1716_0.7434_PLA2	15	N	E	0.501	0.018	0.019	0.964	0.486111
N.melanoleuca_2841_1526_1716_0.7434_PLA2	16	R	B	0.232	0.018	0.019	0.964	0.493333
N.melanoleuca_2841_1526_1716_0.7434_PLA2	17	P	B	0.111	0.058	0.017	0.925	0.496111
N.melanoleuca_2841_1526_1716_0.7434_PLA2	18	W	B	0.11	0.339	0.016	0.645	0.515778
N.melanoleuca_2841_1526_1716_0.7434_PLA2	19	W	B	0.198	0.354	0.048	0.598	0.510222
N.melanoleuca_2841_1526_1716_0.7434_PLA2	20	H	B	0.226	0.386	0.097	0.517	0.504222
N.melanoleuca_2841_1526_1716_0.7434_PLA2	21	F	B	0.073	0.428	0.171	0.402	0.490667
N.melanoleuca_2841_1526_1716_0.7434_PLA2	22	A	E	0.293	0.386	0.097	0.517	0.476444
N.melanoleuca_2841_1526_1716_0.7434_PLA2	23	N	E	0.399	0.191	0.086	0.723	0.476778
N.melanoleuca_2841_1526_1716_0.7434_PLA2	24	Y	B	0.054	0.052	0.084	0.864	0.46
N.melanoleuca_2841_1526_1716_0.7434_PLA2	25	G	B	0.048	0.019	0.141	0.84	0.452333
N.melanoleuca_2841_1526_1716_0.7434_PLA2	26	C	B	0.028	0.021	0.279	0.699	0.466556
N.melanoleuca_2841_1526_1716_0.7434_PLA2	27	Y	B	0.08	0.021	0.451	0.528	0.472889
N.melanoleuca_2841_1526_1716_0.7434_PLA2	28	C	B	0.022	0.021	0.279	0.699	0.477111
N.melanoleuca_2841_1526_1716_0.7434_PLA2	29	G	B	0.11	0.019	0.141	0.84	0.507
N.melanoleuca_2841_1526_1716_0.7434_PLA2	30	R	E	0.362	0.018	0.088	0.893	0.530778
N.melanoleuca_2841_1526_1716_0.7434_PLA2	31	G	E	0.305	0.005	0.015	0.979	0.556556
N.melanoleuca_2841_1526_1716_0.7434_PLA2	32	G	B	0.29	0.005	0.015	0.979	0.564556
N.melanoleuca_2841_1526_1716_0.7434_PLA2	33	K	E	0.58	0.018	0.047	0.935	0.578667
N.melanoleuca_2841_1526_1716_0.7434_PLA2	34	G	E	0.449	0.018	0.047	0.935	0.604556
N.melanoleuca_2841_1526_1716_0.7434_PLA2	35	T	E	0.43	0.018	0.047	0.935	0.613556
N.melanoleuca_2841_1526_1716_0.7434_PLA2	36	P	B	0.239	0.018	0.047	0.935	0.605444
N.melanoleuca_2841_1526_1716_0.7434_PLA2	37	V	E	0.328	0.052	0.084	0.864	0.603
N.melanoleuca_2841_1526_1716_0.7434_PLA2	38	D	E	0.428	0.018	0.088	0.893	0.578556
N.melanoleuca_2841_1526_1716_0.7434_PLA2	39	D	E	0.515	0.052	0.084	0.864	0.553333
N.melanoleuca_2841_1526_1716_0.7434_PLA2	40	L	E	0.299	0.113	0.043	0.844	0.530222
N.melanoleuca_2841_1526_1716_0.7434_PLA2	41	D	E	0.302	0.184	0.043	0.773	0.524889
N.melanoleuca_2841_1526_1716_0.7434_PLA2	42	R	E	0.34	0.354	0.048	0.598	0.526222
N.melanoleuca_2841_1526_1716_0.7434_PLA2	43	C	B	0.031	0.561	0.047	0.393	0.505556
N.melanoleuca_2841_1526_1716_0.7434_PLA2	44	C	B	0.038	0.605	0.105	0.29	0.489111
N.melanoleuca_2841_1526_1716_0.7434_PLA2	45	Q	E	0.378	0.605	0.105	0.29	0.490222
N.melanoleuca_2841_1526_1716_0.7434_PLA2	46	I	E	0.374	0.354	0.048	0.598	0.470778
N.melanoleuca_2841_1526_1716_0.7434_PLA2	47	H	B	0.124	0.257	0.016	0.727	0.470556
N.melanoleuca_2841_1526_1716_0.7434_PLA2	48	D	E	0.537	0.181	0.016	0.803	0.483
N.melanoleuca_2841_1526_1716_0.7434_PLA2	49	K	B	0.283	0.522	0.016	0.462	0.487667
N.melanoleuca_2841_1526_1716_0.7434_PLA2	50	C	B	0.03	0.717	0.014	0.269	0.475889
N.melanoleuca_2841_1526_1716_0.7434_PLA2	51	Y	B	0.113	0.923	0.002	0.076	0.482444
N.melanoleuca_2841_1526_1716_0.7434_PLA2	52	D	E	0.584	0.923	0.002	0.076	0.480556
N.melanoleuca_2841_1526_1716_0.7434_PLA2	53	E	E	0.345	0.923	0.002	0.076	0.485556
N.melanoleuca_2841_1526_1716_0.7434_PLA2	54	A	B	0.033	0.923	0.002	0.076	0.487778
N.melanoleuca_2841_1526_1716_0.7434_PLA2	55	E	E	0.476	0.858	0.002	0.139	0.507333
N.melanoleuca_2841_1526_1716_0.7434_PLA2	56	K	E	0.719	0.717	0.014	0.269	0.503222
N.melanoleuca_2841_1526_1716_0.7434_PLA2	57	I	B	0.227	0.246	0.004	0.75	0.509778
N.melanoleuca_2841_1526_1716_0.7434_PLA2	58	S	E	0.622	0.016	0.005	0.979	0.517667
N.melanoleuca_2841_1526_1716_0.7434_PLA2	59	G	E	0.416	0.018	0.019	0.964	0.534667
N.melanoleuca_2841_1526_1716_0.7434_PLA2	60	C	B	0.055	0.018	0.047	0.935	0.522444
N.melanoleuca_2841_1526_1716_0.7434_PLA2	61	W	E	0.293	0.018	0.088	0.893	0.534889
N.melanoleuca_2841_1526_1716_0.7434_PLA2	62	P	B	0.326	0.005	0.262	0.733	0.525444
N.melanoleuca_2841_1526_1716_0.7434_PLA2	63	Y	E	0.309	0.005	0.336	0.66	0.509667
N.melanoleuca_2841_1526_1716_0.7434_PLA2	64	I	B	0.158	0.004	0.514	0.481	0.496111
N.melanoleuca_2841_1526_1716_0.7434_PLA2	65	K	E	0.327	0.004	0.42	0.576	0.487444
N.melanoleuca_2841_1526_1716_0.7434_PLA2	66	T	E	0.356	0.004	0.616	0.381	0.469556
N.melanoleuca_2841_1526_1716_0.7434_PLA2	67	Y	B	0.064	0.003	0.718	0.279	0.457556
N.melanoleuca_2841_1526_1716_0.7434_PLA2	68	T	E	0.381	0.002	0.816	0.182	0.454556
N.melanoleuca_2841_1526_1716_0.7434_PLA2	69	Y	B	0.092	0.001	0.9	0.099	0.455111
N.melanoleuca_2841_1526_1716_0.7434_PLA2	70	E	E	0.443	0.011	0.918	0.071	0.446778
N.melanoleuca_2841_1526_1716_0.7434_PLA2	71	S	B	0.157	0.001	0.9	0.099	0.448667
N.melanoleuca_2841_1526_1716_0.7434_PLA2	72	C	E	0.512	0.003	0.718	0.279	0.448556
N.melanoleuca_2841_1526_1716_0.7434_PLA2	73	Q	E	0.73	0.005	0.045	0.951	0.448333
N.melanoleuca_2841_1526_1716_0.7434_PLA2	74	G	E	0.526	0.005	0.045	0.951	0.435444
N.melanoleuca_2841_1526_1716_0.7434_PLA2	75	T	E	0.561	0.004	0.514	0.481	0.441778
N.melanoleuca_2841_1526_1716_0.7434_PLA2	76	L	B	0.066	0.002	0.816	0.182	0.447444
N.melanoleuca_2841_1526_1716_0.7434_PLA2	77	T	E	0.447	0.001	0.9	0.099	0.449333
N.melanoleuca_2841_1526_1716_0.7434_PLA2	78	C	B	0.039	0.002	0.816	0.182	0.454667
N.melanoleuca_2841_1526_1716_0.7434_PLA2	79	K	E	0.502	0.005	0.262	0.733	0.459222
N.melanoleuca_2841_1526_1716_0.7434_PLA2	80	D	E	0.67	0.005	0.045	0.951	0.454556
N.melanoleuca_2841_1526_1716_0.7434_PLA2	81	G	E	0.619	0.109	0.005	0.886	0.462111
N.melanoleuca_2841_1526_1716_0.7434_PLA2	82	G	E	0.555	0.246	0.004	0.75	0.458778
N.melanoleuca_2841_1526_1716_0.7434_PLA2	83	K	E	0.406	0.858	0.002	0.139	0.469444
N.melanoleuca_2841_1526_1716_0.7434_PLA2	84	C	B	0.036	0.858	0.002	0.139	0.450222
N.melanoleuca_2841_1526_1716_0.7434_PLA2	85	A	B	0.222	0.923	0.002	0.076	0.443556
N.melanoleuca_2841_1526_1716_0.7434_PLA2	86	A	E	0.49	0.923	0.002	0.076	0.440556
N.melanoleuca_2841_1526_1716_0.7434_PLA2	87	S	B	0.219	0.97	0.001	0.03	0.410889
N.melanoleuca_2841_1526_1716_0.7434_PLA2	88	V	B	0.08	0.97	0.001	0.03	0.398333
N.melanoleuca_2841_1526_1716_0.7434_PLA2	89	C	B	0.069	0.923	0.002	0.076	0.407889
N.melanoleuca_2841_1526_1716_0.7434_PLA2	90	D	E	0.438	0.923	0.002	0.076	0.409778
N.melanoleuca_2841_1526_1716_0.7434_PLA2	91	C	B	0.034	0.923	0.002	0.076	0.400222
N.melanoleuca_2841_1526_1716_0.7434_PLA2	92	D	B	0.118	0.923	0.002	0.076	0.392222
N.melanoleuca_2841_1526_1716_0.7434_PLA2	93	R	E	0.371	0.97	0.001	0.03	0.404
N.melanoleuca_2841_1526_1716_0.7434_PLA2	94	V	B	0.246	0.988	0	0.012	0.393667
N.melanoleuca_2841_1526_1716_0.7434_PLA2	95	A	B	0.03	0.988	0	0.012	0.376667
N.melanoleuca_2841_1526_1716_0.7434_PLA2	96	A	B	0.039	0.988	0	0.012	0.395
N.melanoleuca_2841_1526_1716_0.7434_PLA2	97	N	E	0.294	0.97	0.001	0.03	0.416
N.melanoleuca_2841_1526_1716_0.7434_PLA2	98	C	B	0.022	0.97	0.001	0.03	0.413667
N.melanoleuca_2841_1526_1716_0.7434_PLA2	99	F	B	0.062	0.858	0.002	0.139	0.419333
N.melanoleuca_2841_1526_1716_0.7434_PLA2	100	A	E	0.284	0.694	0.003	0.303	0.440556
N.melanoleuca_2841_1526_1716_0.7434_PLA2	101	R	E	0.537	0.502	0.002	0.495	0.469111
N.melanoleuca_2841_1526_1716_0.7434_PLA2	102	A	B	0.14	0.109	0.005	0.886	0.496778
N.melanoleuca_2841_1526_1716_0.7434_PLA2	103	T	E	0.46	0.058	0.017	0.925	0.536444
N.melanoleuca_2841_1526_1716_0.7434_PLA2	104	Y	B	0.227	0.018	0.047	0.935	0.562222
N.melanoleuca_2841_1526_1716_0.7434_PLA2	105	N	E	0.256	0.018	0.019	0.964	0.583444
N.melanoleuca_2841_1526_1716_0.7434_PLA2	106	D	E	0.613	0.181	0.016	0.803	0.584889
N.melanoleuca_2841_1526_1716_0.7434_PLA2	107	K	E	0.619	0.181	0.016	0.803	0.591889
N.melanoleuca_2841_1526_1716_0.7434_PLA2	108	N	B	0.252	0.181	0.016	0.803	0.593
N.melanoleuca_2841_1526_1716_0.7434_PLA2	109	Y	E	0.313	0.184	0.043	0.773	0.602333
N.melanoleuca_2841_1526_1716_0.7434_PLA2	110	N	E	0.497	0.053	0.043	0.903	0.604889
N.melanoleuca_2841_1526_1716_0.7434_PLA2	111	I	B	0.176	0.053	0.043	0.903	0.588
N.melanoleuca_2841_1526_1716_0.7434_PLA2	112	D	E	0.489	0.018	0.019	0.964	0.577
N.melanoleuca_2841_1526_1716_0.7434_PLA2	113	F	E	0.486	0.018	0.019	0.964	0.560889
N.melanoleuca_2841_1526_1716_0.7434_PLA2	114	N	E	0.594	0.018	0.019	0.964	0.551556
N.melanoleuca_2841_1526_1716_0.7434_PLA2	115	A	E	0.481	0.018	0.019	0.964	0.481333
N.melanoleuca_2841_1526_1716_0.7434_PLA2	116	R	E	0.468	0.018	0.019	0.964	0.419333
N.melanoleuca_2841_1526_1716_0.7434_PLA2	117	C	B	0.091	0.018	0.019	0.964	0.359
N.melanoleuca_2841_1526_1716_0.7434_PLA2	118	Q	E	0.745	0.003	0.003	0.994	0.293444
N.mossambica_1210_1102_1125_1292_10.3747_PLA2	1	L	E	0.482	0.003	0.003	0.994	0.266556
N.mossambica_1210_1102_1125_1292_10.3747_PLA2	2	N	E	0.395	0.053	0.043	0.903	0.309778
N.mossambica_1210_1102_1125_1292_10.3747_PLA2	3	L	B	0.206	0.879	0.01	0.111	0.374
N.mossambica_1210_1102_1125_1292_10.3747_PLA2	4	Y	E	0.264	0.879	0.01	0.111	0.426222
N.mossambica_1210_1102_1125_1292_10.3747_PLA2	5	Q	B	0.279	0.938	0.007	0.055	0.461889
N.mossambica_1210_1102_1125_1292_10.3747_PLA2	6	F	B	0.054	0.938	0.007	0.055	0.460667
N.mossambica_1210_1102_1125_1292_10.3747_PLA2	7	K	B	0.23	0.923	0.002	0.076	0.477333
N.mossambica_1210_1102_1125_1292_10.3747_PLA2	8	N	E	0.376	0.923	0.002	0.076	0.470111
N.mossambica_1210_1102_1125_1292_10.3747_PLA2	9	M	B	0.054	0.97	0.001	0.03	0.457556
N.mossambica_1210_1102_1125_1292_10.3747_PLA2	10	I	B	0.032	0.975	0.003	0.022	0.429111
N.mossambica_1210_1102_1125_1292_10.3747_PLA2	11	H	E	0.331	0.938	0.007	0.055	0.453333
N.mossambica_1210_1102_1125_1292_10.3747_PLA2	12	C	B	0.2	0.879	0.01	0.111	0.445111
N.mossambica_1210_1102_1125_1292_10.3747_PLA2	13	T	B	0.133	0.802	0.014	0.185	0.454667
N.mossambica_1210_1102_1125_1292_10.3747_PLA2	14	V	B	0.115	0.339	0.016	0.645	0.472556
N.mossambica_1210_1102_1125_1292_10.3747_PLA2	15	P	E	0.462	0.058	0.017	0.925	0.485111
N.mossambica_1210_1102_1125_1292_10.3747_PLA2	16	S	E	0.442	0.018	0.019	0.964	0.484
N.mossambica_1210_1102_1125_1292_10.3747_PLA2	17	R	B	0.259	0.018	0.019	0.964	0.490444
N.mossambica_1210_1102_1125_1292_10.3747_PLA2	18	P	B	0.071	0.115	0.016	0.868	0.487889
N.mossambica_1210_1102_1125_1292_10.3747_PLA2	19	W	B	0.108	0.43	0.016	0.555	0.504333
N.mossambica_1210_1102_1125_1292_10.3747_PLA2	20	W	B	0.199	0.455	0.046	0.498	0.494889
N.mossambica_1210_1102_1125_1292_10.3747_PLA2	21	H	B	0.209	0.502	0.102	0.396	0.491
N.mossambica_1210_1102_1125_1292_10.3747_PLA2	22	F	B	0.065	0.502	0.102	0.396	0.480889
N.mossambica_1210_1102_1125_1292_10.3747_PLA2	23	A	E	0.257	0.386	0.097	0.517	0.469556
N.mossambica_1210_1102_1125_1292_10.3747_PLA2	24	D	E	0.377	0.278	0.093	0.628	0.474556
N.mossambica_1210_1102_1125_1292_10.3747_PLA2	25	Y	B	0.057	0.113	0.087	0.8	0.457778
N.mossambica_1210_1102_1125_1292_10.3747_PLA2	26	G	B	0.047	0.056	0.142	0.802	0.448444
N.mossambica_1210_1102_1125_1292_10.3747_PLA2	27	C	B	0.028	0.066	0.296	0.638	0.464778
N.mossambica_1210_1102_1125_1292_10.3747_PLA2	28	Y	B	0.08	0.021	0.451	0.528	0.473556
N.mossambica_1210_1102_1125_1292_10.3747_PLA2	29	C	B	0.02	0.022	0.359	0.619	0.478222
N.mossambica_1210_1102_1125_1292_10.3747_PLA2	30	G	B	0.096	0.02	0.205	0.775	0.507667
N.mossambica_1210_1102_1125_1292_10.3747_PLA2	31	R	E	0.301	0.019	0.141	0.84	0.533444
N.mossambica_1210_1102_1125_1292_10.3747_PLA2	32	G	E	0.352	0.005	0.045	0.951	0.563667
N.mossambica_1210_1102_1125_1292_10.3747_PLA2	33	G	B	0.311	0.005	0.045	0.951	0.578667
N.mossambica_1210_1102_1125_1292_10.3747_PLA2	34	K	E	0.545	0.018	0.047	0.935	0.598889
N.mossambica_1210_1102_1125_1292_10.3747_PLA2	35	G	E	0.45	0.005	0.045	0.951	0.625778
N.mossambica_1210_1102_1125_1292_10.3747_PLA2	36	T	E	0.418	0.005	0.015	0.979	0.638111
N.mossambica_1210_1102_1125_1292_10.3747_PLA2	37	P	E	0.299	0.018	0.047	0.935	0.633444
N.mossambica_1210_1102_1125_1292_10.3747_PLA2	38	V	E	0.464	0.018	0.047	0.935	0.637222
N.mossambica_1210_1102_1125_1292_10.3747_PLA2	39	D	E	0.469	0.018	0.047	0.935	0.623111
N.mossambica_1210_1102_1125_1292_10.3747_PLA2	40	D	E	0.569	0.053	0.043	0.903	0.598778
N.mossambica_1210_1102_1125_1292_10.3747_PLA2	41	L	E	0.371	0.053	0.043	0.903	0.581667
N.mossambica_1210_1102_1125_1292_10.3747_PLA2	42	D	E	0.378	0.053	0.043	0.903	0.576
N.mossambica_1210_1102_1125_1292_10.3747_PLA2	43	R	E	0.353	0.113	0.087	0.8	0.573
N.mossambica_1210_1102_1125_1292_10.3747_PLA2	44	C	B	0.04	0.216	0.235	0.548	0.558667
N.mossambica_1210_1102_1125_1292_10.3747_PLA2	45	C	B	0.064	0.125	0.227	0.648	0.543
N.mossambica_1210_1102_1125_1292_10.3747_PLA2	46	Q	E	0.376	0.125	0.227	0.648	0.537
N.mossambica_1210_1102_1125_1292_10.3747_PLA2	47	V	E	0.399	0.052	0.084	0.864	0.518111
N.mossambica_1210_1102_1125_1292_10.3747_PLA2	48	H	B	0.222	0.018	0.047	0.935	0.506333
N.mossambica_1210_1102_1125_1292_10.3747_PLA2	49	D	E	0.553	0.058	0.017	0.925	0.507778
N.mossambica_1210_1102_1125_1292_10.3747_PLA2	50	N	B	0.221	0.257	0.016	0.727	0.505333
N.mossambica_1210_1102_1125_1292_10.3747_PLA2	51	C	B	0.055	0.522	0.016	0.462	0.486
N.mossambica_1210_1102_1125_1292_10.3747_PLA2	52	Y	B	0.122	0.858	0.002	0.139	0.486778
N.mossambica_1210_1102_1125_1292_10.3747_PLA2	53	E	E	0.512	0.858	0.002	0.139	0.483556
N.mossambica_1210_1102_1125_1292_10.3747_PLA2	54	K	E	0.429	0.858	0.002	0.139	0.486556
N.mossambica_1210_1102_1125_1292_10.3747_PLA2	55	A	B	0.049	0.858	0.002	0.139	0.489556
N.mossambica_1210_1102_1125_1292_10.3747_PLA2	56	G	E	0.494	0.782	0.003	0.216	0.483111
N.mossambica_1210_1102_1125_1292_10.3747_PLA2	57	K	E	0.776	0.522	0.016	0.462	0.487444
N.mossambica_1210_1102_1125_1292_10.3747_PLA2	58	M	E	0.439	0.109	0.005	0.886	0.490889
N.mossambica_1210_1102_1125_1292_10.3747_PLA2	59	G	E	0.502	0.016	0.005	0.979	0.502444
N.mossambica_1210_1102_1125_1292_10.3747_PLA2	60	C	B	0.066	0.018	0.047	0.935	0.517556
N.mossambica_1210_1102_1125_1292_10.3747_PLA2	61	W	B	0.271	0.018	0.088	0.893	0.516556
N.mossambica_1210_1102_1125_1292_10.3747_PLA2	62	P	B	0.287	0.004	0.197	0.799	0.517333
N.mossambica_1210_1102_1125_1292_10.3747_PLA2	63	Y	E	0.376	0.005	0.262	0.733	0.512111
N.mossambica_1210_1102_1125_1292_10.3747_PLA2	64	L	B	0.22	0.004	0.42	0.576	0.509222
N.mossambica_1210_1102_1125_1292_10.3747_PLA2	65	T	E	0.402	0.004	0.42	0.576	0.518778
N.mossambica_1210_1102_1125_1292_10.3747_PLA2	66	L	E	0.389	0.004	0.514	0.481	0.501222
N.mossambica_1210_1102_1125_1292_10.3747_PLA2	67	Y	B	0.1	0.004	0.616	0.381	0.486556
N.mossambica_1210_1102_1125_1292_10.3747_PLA2	68	K	E	0.458	0.002	0.816	0.182	0.476444
N.mossambica_1210_1102_1125_1292_10.3747_PLA2	69	Y	B	0.089	0.011	0.918	0.071	0.468889
N.mossambica_1210_1102_1125_1292_10.3747_PLA2	70	K	E	0.423	0.011	0.918	0.071	0.467778
N.mossambica_1210_1102_1125_1292_10.3747_PLA2	71	C	B	0.137	0.001	0.9	0.099	0.464667
N.mossambica_1210_1102_1125_1292_10.3747_PLA2	72	S	E	0.519	0.002	0.816	0.182	0.450111
N.mossambica_1210_1102_1125_1292_10.3747_PLA2	73	Q	E	0.721	0.005	0.045	0.951	0.447
N.mossambica_1210_1102_1125_1292_10.3747_PLA2	74	G	E	0.535	0.005	0.015	0.979	0.426
N.mossambica_1210_1102_1125_1292_10.3747_PLA2	75	K	E	0.542	0.004	0.616	0.381	0.437889
N.mossambica_1210_1102_1125_1292_10.3747_PLA2	76	L	B	0.056	0.001	0.9	0.099	0.452333
N.mossambica_1210_1102_1125_1292_10.3747_PLA2	77	T	E	0.349	0.001	0.959	0.04	0.461222
N.mossambica_1210_1102_1125_1292_10.3747_PLA2	78	C	B	0.039	0.002	0.816	0.182	0.466222
N.mossambica_1210_1102_1125_1292_10.3747_PLA2	79	S	E	0.421	0.005	0.336	0.66	0.464
N.mossambica_1210_1102_1125_1292_10.3747_PLA2	80	G	E	0.711	0.005	0.045	0.951	0.461778
N.mossambica_1210_1102_1125_1292_10.3747_PLA2	81	G	E	0.708	0.003	0.003	0.994	0.460111
N.mossambica_1210_1102_1125_1292_10.3747_PLA2	82	N	E	0.586	0.016	0.005	0.979	0.463556
N.mossambica_1210_1102_1125_1292_10.3747_PLA2	83	S	E	0.564	0.246	0.004	0.75	0.478889
N.mossambica_1210_1102_1125_1292_10.3747_PLA2	84	K	E	0.443	0.782	0.003	0.216	0.469111
N.mossambica_1210_1102_1125_1292_10.3747_PLA2	85	C	B	0.031	0.858	0.002	0.139	0.453444
N.mossambica_1210_1102_1125_1292_10.3747_PLA2	86	G	B	0.221	0.858	0.002	0.139	0.434778
N.mossambica_1210_1102_1125_1292_10.3747_PLA2	87	A	E	0.495	0.938	0.007	0.055	0.436667
N.mossambica_1210_1102_1125_1292_10.3747_PLA2	88	A	B	0.249	0.938	0.007	0.055	0.406556
N.mossambica_1210_1102_1125_1292_10.3747_PLA2	89	V	B	0.106	0.923	0.002	0.076	0.400889
N.mossambica_1210_1102_1125_1292_10.3747_PLA2	90	C	B	0.074	0.923	0.002	0.076	0.409222
N.mossambica_1210_1102_1125_1292_10.3747_PLA2	91	N	E	0.475	0.923	0.002	0.076	0.406333
N.mossambica_1210_1102_1125_1292_10.3747_PLA2	92	C	B	0.034	0.923	0.002	0.076	0.394111
N.mossambica_1210_1102_1125_1292_10.3747_PLA2	93	D	B	0.113	0.97	0.001	0.03	0.380889
N.mossambica_1210_1102_1125_1292_10.3747_PLA2	94	L	E	0.361	0.988	0	0.012	0.385889
N.mossambica_1210_1102_1125_1292_10.3747_PLA2	95	V	B	0.233	0.988	0	0.012	0.374667
N.mossambica_1210_1102_1125_1292_10.3747_PLA2	96	A	B	0.026	0.988	0	0.012	0.36
N.mossambica_1210_1102_1125_1292_10.3747_PLA2	97	A	B	0.051	0.97	0.001	0.03	0.380889
N.mossambica_1210_1102_1125_1292_10.3747_PLA2	98	N	E	0.311	0.97	0.001	0.03	0.396778
N.mossambica_1210_1102_1125_1292_10.3747_PLA2	99	C	B	0.025	0.923	0.002	0.076	0.402444
N.mossambica_1210_1102_1125_1292_10.3747_PLA2	100	F	B	0.052	0.782	0.003	0.216	0.416889
N.mossambica_1210_1102_1125_1292_10.3747_PLA2	101	A	E	0.307	0.502	0.002	0.495	0.438222
N.mossambica_1210_1102_1125_1292_10.3747_PLA2	102	G	E	0.611	0.321	0.003	0.675	0.457
N.mossambica_1210_1102_1125_1292_10.3747_PLA2	103	A	B	0.132	0.109	0.005	0.886	0.484333
N.mossambica_1210_1102_1125_1292_10.3747_PLA2	104	R	E	0.487	0.058	0.017	0.925	0.519333
N.mossambica_1210_1102_1125_1292_10.3747_PLA2	105	Y	B	0.284	0.018	0.047	0.935	0.538889
N.mossambica_1210_1102_1125_1292_10.3747_PLA2	106	I	B	0.225	0.018	0.047	0.935	0.551556
N.mossambica_1210_1102_1125_1292_10.3747_PLA2	107	D	E	0.538	0.113	0.043	0.844	0.561
N.mossambica_1210_1102_1125_1292_10.3747_PLA2	108	A	E	0.631	0.181	0.016	0.803	0.566
N.mossambica_1210_1102_1125_1292_10.3747_PLA2	109	N	E	0.359	0.184	0.043	0.773	0.566556
N.mossambica_1210_1102_1125_1292_10.3747_PLA2	110	Y	B	0.204	0.113	0.043	0.844	0.579778
N.mossambica_1210_1102_1125_1292_10.3747_PLA2	111	N	E	0.481	0.052	0.084	0.864	0.599556
N.mossambica_1210_1102_1125_1292_10.3747_PLA2	112	I	B	0.227	0.053	0.043	0.903	0.592667
N.mossambica_1210_1102_1125_1292_10.3747_PLA2	113	N	E	0.462	0.018	0.019	0.964	0.586444
N.mossambica_1210_1102_1125_1292_10.3747_PLA2	114	F	E	0.519	0.018	0.019	0.964	0.572111
N.mossambica_1210_1102_1125_1292_10.3747_PLA2	115	K	E	0.623	0.018	0.019	0.964	0.573667
N.mossambica_1210_1102_1125_1292_10.3747_PLA2	116	K	E	0.521	0.018	0.019	0.964	0.503222
N.mossambica_1210_1102_1125_1292_10.3747_PLA2	117	R	E	0.415	0.018	0.019	0.964	0.444
N.mossambica_1210_1102_1125_1292_10.3747_PLA2	118	C	B	0.066	0.018	0.019	0.964	0.376
N.mossambica_1210_1102_1125_1292_10.3747_PLA2	119	Q	E	0.716	0.003	0.003	0.994	0.308667
N.mossambica_1223_1093_0.0180_PLA2	1	N	E	0.695	0.003	0.003	0.994	0.252556
N.mossambica_1223_1093_0.0180_PLA2	2	L	E	0.256	0.858	0.002	0.139	0.316667
N.mossambica_1223_1093_0.0180_PLA2	3	Y	E	0.284	0.858	0.002	0.139	0.368556
N.mossambica_1223_1093_0.0180_PLA2	4	Q	E	0.325	0.879	0.01	0.111	0.404333
N.mossambica_1223_1093_0.0180_PLA2	5	F	B	0.05	0.938	0.007	0.055	0.439333
N.mossambica_1223_1093_0.0180_PLA2	6	K	B	0.221	0.923	0.002	0.076	0.463889
N.mossambica_1223_1093_0.0180_PLA2	7	N	E	0.403	0.97	0.001	0.03	0.459556
N.mossambica_1223_1093_0.0180_PLA2	8	M	B	0.057	0.97	0.001	0.03	0.447222
N.mossambica_1223_1093_0.0180_PLA2	9	I	B	0.032	0.97	0.001	0.03	0.427222
N.mossambica_1223_1093_0.0180_PLA2	10	H	E	0.334	0.938	0.007	0.055	0.449556
N.mossambica_1223_1093_0.0180_PLA2	11	C	B	0.195	0.879	0.01	0.111	0.439667
N.mossambica_1223_1093_0.0180_PLA2	12	T	B	0.126	0.802	0.014	0.185	0.449
N.mossambica_1223_1093_0.0180_PLA2	13	V	B	0.106	0.339	0.016	0.645	0.466778
N.mossambica_1223_1093_0.0180_PLA2	14	P	E	0.452	0.058	0.017	0.925	0.479111
N.mossambica_1223_1093_0.0180_PLA2	15	S	E	0.431	0.018	0.019	0.964	0.478333
N.mossambica_1223_1093_0.0180_PLA2	16	R	B	0.26	0.018	0.019	0.964	0.485111
N.mossambica_1223_1093_0.0180_PLA2	17	P	B	0.069	0.115	0.016	0.868	0.483778
N.mossambica_1223_1093_0.0180_PLA2	18	W	B	0.105	0.43	0.016	0.555	0.501
N.mossambica_1223_1093_0.0180_PLA2	19	W	B	0.194	0.455	0.046	0.498	0.491889
N.mossambica_1223_1093_0.0180_PLA2	20	H	B	0.204	0.502	0.102	0.396	0.490667
N.mossambica_1223_1093_0.0180_PLA2	21	F	B	0.063	0.502	0.102	0.396	0.481222
N.mossambica_1223_1093_0.0180_PLA2	22	A	E	0.254	0.386	0.097	0.517	0.470111
N.mossambica_1223_1093_0.0180_PLA2	23	D	E	0.375	0.278	0.093	0.628	0.475
N.mossambica_1223_1093_0.0180_PLA2	24	Y	B	0.057	0.113	0.087	0.8	0.458667
N.mossambica_1223_1093_0.0180_PLA2	25	G	B	0.046	0.019	0.141	0.84	0.448556
N.mossambica_1223_1093_0.0180_PLA2	26	C	B	0.027	0.022	0.359	0.619	0.463444
N.mossambica_1223_1093_0.0180_PLA2	27	Y	B	0.076	0.021	0.451	0.528	0.470444
N.mossambica_1223_1093_0.0180_PLA2	28	C	B	0.019	0.022	0.359	0.619	0.475222
N.mossambica_1223_1093_0.0180_PLA2	29	G	B	0.089	0.021	0.279	0.699	0.503778
N.mossambica_1223_1093_0.0180_PLA2	30	R	E	0.289	0.019	0.141	0.84	0.528889
N.mossambica_1223_1093_0.0180_PLA2	31	G	E	0.342	0.005	0.045	0.951	0.558444
N.mossambica_1223_1093_0.0180_PLA2	32	G	B	0.308	0.005	0.045	0.951	0.572778
N.mossambica_1223_1093_0.0180_PLA2	33	K	E	0.541	0.018	0.047	0.935	0.592222
N.mossambica_1223_1093_0.0180_PLA2	34	G	E	0.441	0.005	0.045	0.951	0.619444
N.mossambica_1223_1093_0.0180_PLA2	35	T	E	0.418	0.005	0.045	0.951	0.632667
N.mossambica_1223_1093_0.0180_PLA2	36	P	E	0.294	0.018	0.047	0.935	0.629778
N.mossambica_1223_1093_0.0180_PLA2	37	V	E	0.46	0.018	0.047	0.935	0.633667
N.mossambica_1223_1093_0.0180_PLA2	38	D	E	0.464	0.018	0.047	0.935	0.619222
N.mossambica_1223_1093_0.0180_PLA2	39	D	E	0.565	0.053	0.043	0.903	0.595556
N.mossambica_1223_1093_0.0180_PLA2	40	L	E	0.369	0.053	0.043	0.903	0.578333
N.mossambica_1223_1093_0.0180_PLA2	41	D	E	0.374	0.053	0.043	0.903	0.573333
N.mossambica_1223_1093_0.0180_PLA2	42	R	E	0.354	0.113	0.087	0.8	0.570778
N.mossambica_1223_1093_0.0180_PLA2	43	C	B	0.039	0.199	0.152	0.649	0.556667
N.mossambica_1223_1093_0.0180_PLA2	44	C	B	0.062	0.125	0.227	0.648	0.54
N.mossambica_1223_1093_0.0180_PLA2	45	Q	E	0.381	0.125	0.227	0.648	0.535222
N.mossambica_1223_1093_0.0180_PLA2	46	V	E	0.392	0.052	0.084	0.864	0.516667
N.mossambica_1223_1093_0.0180_PLA2	47	H	B	0.212	0.053	0.043	0.903	0.504778
N.mossambica_1223_1093_0.0180_PLA2	48	D	E	0.536	0.058	0.017	0.925	0.506444
N.mossambica_1223_1093_0.0180_PLA2	49	N	B	0.217	0.257	0.016	0.727	0.505111
N.mossambica_1223_1093_0.0180_PLA2	50	C	B	0.052	0.522	0.016	0.462	0.486333
N.mossambica_1223_1093_0.0180_PLA2	51	Y	B	0.12	0.879	0.01	0.111	0.487222
N.mossambica_1223_1093_0.0180_PLA2	52	E	E	0.509	0.858	0.002	0.139	0.485
N.mossambica_1223_1093_0.0180_PLA2	53	K	E	0.421	0.879	0.01	0.111	0.488667
N.mossambica_1223_1093_0.0180_PLA2	54	A	B	0.043	0.802	0.014	0.185	0.491889
N.mossambica_1223_1093_0.0180_PLA2	55	G	E	0.48	0.717	0.014	0.269	0.484667
N.mossambica_1223_1093_0.0180_PLA2	56	K	E	0.761	0.522	0.016	0.462	0.490333
N.mossambica_1223_1093_0.0180_PLA2	57	M	E	0.374	0.115	0.016	0.868	0.494333
N.mossambica_1223_1093_0.0180_PLA2	58	G	E	0.474	0.018	0.019	0.964	0.503333
N.mossambica_1223_1093_0.0180_PLA2	59	C	B	0.066	0.018	0.047	0.935	0.519
N.mossambica_1223_1093_0.0180_PLA2	60	W	B	0.271	0.018	0.088	0.893	0.516889
N.mossambica_1223_1093_0.0180_PLA2	61	P	B	0.291	0.004	0.138	0.858	0.514556
N.mossambica_1223_1093_0.0180_PLA2	62	Y	E	0.363	0.005	0.262	0.733	0.513111
N.mossambica_1223_1093_0.0180_PLA2	63	F	B	0.185	0.004	0.42	0.576	0.510556
N.mossambica_1223_1093_0.0180_PLA2	64	T	E	0.378	0.004	0.514	0.481	0.523667
N.mossambica_1223_1093_0.0180_PLA2	65	L	E	0.37	0.004	0.616	0.381	0.504444
N.mossambica_1223_1093_0.0180_PLA2	66	Y	B	0.1	0.003	0.718	0.279	0.489667
N.mossambica_1223_1093_0.0180_PLA2	67	K	E	0.425	0.002	0.816	0.182	0.48
N.mossambica_1223_1093_0.0180_PLA2	68	Y	B	0.097	0.011	0.918	0.071	0.470889
N.mossambica_1223_1093_0.0180_PLA2	69	K	E	0.398	0.011	0.918	0.071	0.471
N.mossambica_1223_1093_0.0180_PLA2	70	C	B	0.125	0.001	0.959	0.04	0.470444
N.mossambica_1223_1093_0.0180_PLA2	71	S	E	0.524	0.002	0.816	0.182	0.453
N.mossambica_1223_1093_0.0180_PLA2	72	Q	E	0.703	0.005	0.045	0.951	0.447
N.mossambica_1223_1093_0.0180_PLA2	73	G	E	0.554	0.005	0.015	0.979	0.423556
N.mossambica_1223_1093_0.0180_PLA2	74	K	E	0.56	0.004	0.514	0.481	0.435778
N.mossambica_1223_1093_0.0180_PLA2	75	L	B	0.05	0.002	0.816	0.182	0.449111
N.mossambica_1223_1093_0.0180_PLA2	76	T	E	0.371	0.001	0.9	0.099	0.459444
N.mossambica_1223_1093_0.0180_PLA2	77	C	B	0.037	0.002	0.816	0.182	0.465889
N.mossambica_1223_1093_0.0180_PLA2	78	S	E	0.409	0.004	0.42	0.576	0.462889
N.mossambica_1223_1093_0.0180_PLA2	79	G	E	0.696	0.005	0.045	0.951	0.461333
N.mossambica_1223_1093_0.0180_PLA2	80	G	E	0.693	0.003	0.003	0.994	0.461111
N.mossambica_1223_1093_0.0180_PLA2	81	N	E	0.61	0.016	0.005	0.979	0.463111
N.mossambica_1223_1093_0.0180_PLA2	82	S	E	0.538	0.246	0.004	0.75	0.479444
N.mossambica_1223_1093_0.0180_PLA2	83	K	E	0.427	0.782	0.003	0.216	0.469444
N.mossambica_1223_1093_0.0180_PLA2	84	C	B	0.031	0.802	0.014	0.185	0.452556
N.mossambica_1223_1093_0.0180_PLA2	85	G	B	0.219	0.879	0.01	0.111	0.434222
N.mossambica_1223_1093_0.0180_PLA2	86	A	E	0.483	0.879	0.01	0.111	0.435444
N.mossambica_1223_1093_0.0180_PLA2	87	A	B	0.243	0.938	0.007	0.055	0.406556
N.mossambica_1223_1093_0.0180_PLA2	88	V	B	0.096	0.938	0.007	0.055	0.399889
N.mossambica_1223_1093_0.0180_PLA2	89	C	B	0.071	0.938	0.007	0.055	0.406778
N.mossambica_1223_1093_0.0180_PLA2	90	N	E	0.468	0.923	0.002	0.076	0.406667
N.mossambica_1223_1093_0.0180_PLA2	91	C	B	0.033	0.923	0.002	0.076	0.393778
N.mossambica_1223_1093_0.0180_PLA2	92	D	B	0.106	0.97	0.001	0.03	0.379778
N.mossambica_1223_1093_0.0180_PLA2	93	L	E	0.35	0.988	0	0.012	0.384778
N.mossambica_1223_1093_0.0180_PLA2	94	V	B	0.241	0.988	0	0.012	0.374
N.mossambica_1223_1093_0.0180_PLA2	95	A	B	0.025	0.988	0	0.012	0.358333
N.mossambica_1223_1093_0.0180_PLA2	96	A	B	0.047	0.97	0.001	0.03	0.378111
N.mossambica_1223_1093_0.0180_PLA2	97	N	E	0.302	0.97	0.001	0.03	0.392333
N.mossambica_1223_1093_0.0180_PLA2	98	C	B	0.025	0.923	0.002	0.076	0.398333
N.mossambica_1223_1093_0.0180_PLA2	99	F	B	0.049	0.782	0.003	0.216	0.413556
N.mossambica_1223_1093_0.0180_PLA2	100	A	E	0.295	0.502	0.002	0.495	0.434
N.mossambica_1223_1093_0.0180_PLA2	101	G	E	0.609	0.321	0.003	0.675	0.454333
N.mossambica_1223_1093_0.0180_PLA2	102	A	B	0.129	0.109	0.005	0.886	0.483333
N.mossambica_1223_1093_0.0180_PLA2	103	R	E	0.477	0.058	0.017	0.925	0.518333
N.mossambica_1223_1093_0.0180_PLA2	104	Y	E	0.288	0.018	0.047	0.935	0.539667
N.mossambica_1223_1093_0.0180_PLA2	105	I	B	0.225	0.018	0.047	0.935	0.553222
N.mossambica_1223_1093_0.0180_PLA2	106	D	E	0.55	0.113	0.043	0.844	0.565333
N.mossambica_1223_1093_0.0180_PLA2	107	A	E	0.611	0.181	0.016	0.803	0.569889
N.mossambica_1223_1093_0.0180_PLA2	108	N	E	0.364	0.184	0.043	0.773	0.569
N.mossambica_1223_1093_0.0180_PLA2	109	Y	B	0.203	0.113	0.043	0.844	0.582444
N.mossambica_1223_1093_0.0180_PLA2	110	N	E	0.482	0.113	0.087	0.8	0.602556
N.mossambica_1223_1093_0.0180_PLA2	111	I	B	0.219	0.053	0.043	0.903	0.595667
N.mossambica_1223_1093_0.0180_PLA2	112	N	E	0.453	0.018	0.019	0.964	0.588778
N.mossambica_1223_1093_0.0180_PLA2	113	F	E	0.523	0.018	0.019	0.964	0.574
N.mossambica_1223_1093_0.0180_PLA2	114	K	E	0.618	0.018	0.019	0.964	0.575111
N.mossambica_1223_1093_0.0180_PLA2	115	K	E	0.519	0.018	0.019	0.964	0.503667
N.mossambica_1223_1093_0.0180_PLA2	116	R	E	0.411	0.018	0.019	0.964	0.444444
N.mossambica_1223_1093_0.0180_PLA2	117	C	B	0.064	0.018	0.019	0.964	0.377111
N.mossambica_1223_1093_0.0180_PLA2	118	Q	E	0.717	0.003	0.003	0.994	0.309778
N.mossambica_1296_1371_1364_1434_1322_1339_1043_1.7546_PLA2	1	L	E	0.482	0.003	0.003	0.994	0.265556
N.mossambica_1296_1371_1364_1434_1322_1339_1043_1.7546_PLA2	2	N	E	0.363	0.053	0.043	0.903	0.308667
N.mossambica_1296_1371_1364_1434_1322_1339_1043_1.7546_PLA2	3	L	B	0.211	0.879	0.01	0.111	0.373667
N.mossambica_1296_1371_1364_1434_1322_1339_1043_1.7546_PLA2	4	Y	E	0.263	0.879	0.01	0.111	0.425667
N.mossambica_1296_1371_1364_1434_1322_1339_1043_1.7546_PLA2	5	Q	B	0.274	0.938	0.007	0.055	0.460556
N.mossambica_1296_1371_1364_1434_1322_1339_1043_1.7546_PLA2	6	F	B	0.056	0.938	0.007	0.055	0.459111
N.mossambica_1296_1371_1364_1434_1322_1339_1043_1.7546_PLA2	7	K	B	0.233	0.923	0.002	0.076	0.476111
N.mossambica_1296_1371_1364_1434_1322_1339_1043_1.7546_PLA2	8	N	E	0.382	0.923	0.002	0.076	0.468889
N.mossambica_1296_1371_1364_1434_1322_1339_1043_1.7546_PLA2	9	M	B	0.054	0.923	0.002	0.076	0.458667
N.mossambica_1296_1371_1364_1434_1322_1339_1043_1.7546_PLA2	10	I	B	0.037	0.938	0.007	0.055	0.430889
N.mossambica_1296_1371_1364_1434_1322_1339_1043_1.7546_PLA2	11	H	E	0.36	0.938	0.007	0.055	0.455889
N.mossambica_1296_1371_1364_1434_1322_1339_1043_1.7546_PLA2	12	C	B	0.201	0.879	0.01	0.111	0.449111
N.mossambica_1296_1371_1364_1434_1322_1339_1043_1.7546_PLA2	13	T	B	0.132	0.717	0.014	0.269	0.461556
N.mossambica_1296_1371_1364_1434_1322_1339_1043_1.7546_PLA2	14	V	B	0.114	0.339	0.016	0.645	0.483333
N.mossambica_1296_1371_1364_1434_1322_1339_1043_1.7546_PLA2	15	P	E	0.446	0.058	0.017	0.925	0.499222
N.mossambica_1296_1371_1364_1434_1322_1339_1043_1.7546_PLA2	16	S	E	0.429	0.018	0.019	0.964	0.500778
N.mossambica_1296_1371_1364_1434_1322_1339_1043_1.7546_PLA2	17	R	B	0.279	0.018	0.019	0.964	0.509667
N.mossambica_1296_1371_1364_1434_1322_1339_1043_1.7546_PLA2	18	P	B	0.099	0.058	0.017	0.925	0.512556
N.mossambica_1296_1371_1364_1434_1322_1339_1043_1.7546_PLA2	19	W	B	0.127	0.268	0.043	0.689	0.531111
N.mossambica_1296_1371_1364_1434_1322_1339_1043_1.7546_PLA2	20	W	B	0.208	0.278	0.093	0.628	0.524333
N.mossambica_1296_1371_1364_1434_1322_1339_1043_1.7546_PLA2	21	H	B	0.232	0.307	0.165	0.527	0.519667
N.mossambica_1296_1371_1364_1434_1322_1339_1043_1.7546_PLA2	22	F	B	0.071	0.307	0.165	0.527	0.506667
N.mossambica_1296_1371_1364_1434_1322_1339_1043_1.7546_PLA2	23	A	E	0.281	0.278	0.093	0.628	0.491889
N.mossambica_1296_1371_1364_1434_1322_1339_1043_1.7546_PLA2	24	D	E	0.367	0.191	0.086	0.723	0.493222
N.mossambica_1296_1371_1364_1434_1322_1339_1043_1.7546_PLA2	25	Y	B	0.056	0.052	0.084	0.864	0.473222
N.mossambica_1296_1371_1364_1434_1322_1339_1043_1.7546_PLA2	26	G	B	0.047	0.019	0.141	0.84	0.459
N.mossambica_1296_1371_1364_1434_1322_1339_1043_1.7546_PLA2	27	C	B	0.028	0.022	0.359	0.619	0.47
N.mossambica_1296_1371_1364_1434_1322_1339_1043_1.7546_PLA2	28	Y	B	0.084	0.021	0.451	0.528	0.476667
N.mossambica_1296_1371_1364_1434_1322_1339_1043_1.7546_PLA2	29	C	B	0.021	0.022	0.359	0.619	0.473778
N.mossambica_1296_1371_1364_1434_1322_1339_1043_1.7546_PLA2	30	G	B	0.101	0.02	0.205	0.775	0.493444
N.mossambica_1296_1371_1364_1434_1322_1339_1043_1.7546_PLA2	31	R	E	0.291	0.018	0.088	0.893	0.520333
N.mossambica_1296_1371_1364_1434_1322_1339_1043_1.7546_PLA2	32	G	E	0.354	0.005	0.045	0.951	0.546667
N.mossambica_1296_1371_1364_1434_1322_1339_1043_1.7546_PLA2	33	G	B	0.249	0.005	0.045	0.951	0.558333
N.mossambica_1296_1371_1364_1434_1322_1339_1043_1.7546_PLA2	34	T	E	0.557	0.018	0.047	0.935	0.576667
N.mossambica_1296_1371_1364_1434_1322_1339_1043_1.7546_PLA2	35	G	E	0.43	0.005	0.045	0.951	0.606667
N.mossambica_1296_1371_1364_1434_1322_1339_1043_1.7546_PLA2	36	T	E	0.475	0.005	0.045	0.951	0.618333
N.mossambica_1296_1371_1364_1434_1322_1339_1043_1.7546_PLA2	37	P	E	0.292	0.018	0.047	0.935	0.609
N.mossambica_1296_1371_1364_1434_1322_1339_1043_1.7546_PLA2	38	V	E	0.413	0.018	0.047	0.935	0.614444
N.mossambica_1296_1371_1364_1434_1322_1339_1043_1.7546_PLA2	39	D	E	0.513	0.018	0.019	0.964	0.605
N.mossambica_1296_1371_1364_1434_1322_1339_1043_1.7546_PLA2	40	D	E	0.566	0.058	0.017	0.925	0.577667
N.mossambica_1296_1371_1364_1434_1322_1339_1043_1.7546_PLA2	41	L	E	0.304	0.115	0.016	0.868	0.562333
N.mossambica_1296_1371_1364_1434_1322_1339_1043_1.7546_PLA2	42	D	E	0.462	0.181	0.016	0.803	0.556889
N.mossambica_1296_1371_1364_1434_1322_1339_1043_1.7546_PLA2	43	R	E	0.361	0.268	0.043	0.689	0.555444
N.mossambica_1296_1371_1364_1434_1322_1339_1043_1.7546_PLA2	44	C	B	0.041	0.386	0.097	0.517	0.538111
N.mossambica_1296_1371_1364_1434_1322_1339_1043_1.7546_PLA2	45	C	B	0.045	0.428	0.171	0.402	0.517444
N.mossambica_1296_1371_1364_1434_1322_1339_1043_1.7546_PLA2	46	Q	E	0.354	0.307	0.165	0.527	0.516222
N.mossambica_1296_1371_1364_1434_1322_1339_1043_1.7546_PLA2	47	V	E	0.422	0.191	0.086	0.723	0.495778
N.mossambica_1296_1371_1364_1434_1322_1339_1043_1.7546_PLA2	48	H	B	0.155	0.053	0.043	0.903	0.488333
N.mossambica_1296_1371_1364_1434_1322_1339_1043_1.7546_PLA2	49	D	E	0.619	0.058	0.017	0.925	0.485444
N.mossambica_1296_1371_1364_1434_1322_1339_1043_1.7546_PLA2	50	N	B	0.247	0.181	0.016	0.803	0.476778
N.mossambica_1296_1371_1364_1434_1322_1339_1043_1.7546_PLA2	51	C	B	0.045	0.522	0.016	0.462	0.458778
N.mossambica_1296_1371_1364_1434_1322_1339_1043_1.7546_PLA2	52	Y	B	0.149	0.858	0.002	0.139	0.465333
N.mossambica_1296_1371_1364_1434_1322_1339_1043_1.7546_PLA2	53	G	E	0.598	0.858	0.002	0.139	0.466
N.mossambica_1296_1371_1364_1434_1322_1339_1043_1.7546_PLA2	54	E	E	0.42	0.858	0.002	0.139	0.477111
N.mossambica_1296_1371_1364_1434_1322_1339_1043_1.7546_PLA2	55	A	B	0.043	0.782	0.003	0.216	0.483111
N.mossambica_1296_1371_1364_1434_1322_1339_1043_1.7546_PLA2	56	E	E	0.556	0.694	0.003	0.303	0.486778
N.mossambica_1296_1371_1364_1434_1322_1339_1043_1.7546_PLA2	57	K	E	0.73	0.502	0.002	0.495	0.495778
N.mossambica_1296_1371_1364_1434_1322_1339_1043_1.7546_PLA2	58	L	E	0.452	0.109	0.005	0.886	0.510444
N.mossambica_1296_1371_1364_1434_1322_1339_1043_1.7546_PLA2	59	G	E	0.532	0.018	0.019	0.964	0.533444
N.mossambica_1296_1371_1364_1434_1322_1339_1043_1.7546_PLA2	60	C	B	0.147	0.018	0.047	0.935	0.552111
N.mossambica_1296_1371_1364_1434_1322_1339_1043_1.7546_PLA2	61	W	B	0.279	0.004	0.085	0.91	0.545667
N.mossambica_1296_1371_1364_1434_1322_1339_1043_1.7546_PLA2	62	P	E	0.403	0.004	0.197	0.799	0.544444
N.mossambica_1296_1371_1364_1434_1322_1339_1043_1.7546_PLA2	63	Y	E	0.4	0.005	0.262	0.733	0.532667
N.mossambica_1296_1371_1364_1434_1322_1339_1043_1.7546_PLA2	64	L	B	0.222	0.004	0.42	0.576	0.527333
N.mossambica_1296_1371_1364_1434_1322_1339_1043_1.7546_PLA2	65	T	E	0.445	0.005	0.336	0.66	0.527778
N.mossambica_1296_1371_1364_1434_1322_1339_1043_1.7546_PLA2	66	L	E	0.432	0.004	0.42	0.576	0.503333
N.mossambica_1296_1371_1364_1434_1322_1339_1043_1.7546_PLA2	67	Y	B	0.089	0.004	0.616	0.381	0.482111
N.mossambica_1296_1371_1364_1434_1322_1339_1043_1.7546_PLA2	68	K	E	0.434	0.002	0.816	0.182	0.469444
N.mossambica_1296_1371_1364_1434_1322_1339_1043_1.7546_PLA2	69	Y	B	0.089	0.011	0.918	0.071	0.460444
N.mossambica_1296_1371_1364_1434_1322_1339_1043_1.7546_PLA2	70	E	E	0.438	0.011	0.918	0.071	0.460111
N.mossambica_1296_1371_1364_1434_1322_1339_1043_1.7546_PLA2	71	C	B	0.152	0.001	0.959	0.04	0.459333
N.mossambica_1296_1371_1364_1434_1322_1339_1043_1.7546_PLA2	72	S	E	0.571	0.002	0.816	0.182	0.448
N.mossambica_1296_1371_1364_1434_1322_1339_1043_1.7546_PLA2	73	Q	E	0.73	0.005	0.045	0.951	0.443667
N.mossambica_1296_1371_1364_1434_1322_1339_1043_1.7546_PLA2	74	G	E	0.454	0.005	0.015	0.979	0.424222
N.mossambica_1296_1371_1364_1434_1322_1339_1043_1.7546_PLA2	75	K	E	0.536	0.004	0.616	0.381	0.436889
N.mossambica_1296_1371_1364_1434_1322_1339_1043_1.7546_PLA2	76	L	B	0.048	0.002	0.816	0.182	0.454222
N.mossambica_1296_1371_1364_1434_1322_1339_1043_1.7546_PLA2	77	T	E	0.379	0.001	0.9	0.099	0.464889
N.mossambica_1296_1371_1364_1434_1322_1339_1043_1.7546_PLA2	78	C	B	0.031	0.002	0.816	0.182	0.477333
N.mossambica_1296_1371_1364_1434_1322_1339_1043_1.7546_PLA2	79	S	E	0.492	0.005	0.262	0.733	0.481556
N.mossambica_1296_1371_1364_1434_1322_1339_1043_1.7546_PLA2	80	G	E	0.617	0.005	0.045	0.951	0.483444
N.mossambica_1296_1371_1364_1434_1322_1339_1043_1.7546_PLA2	81	G	E	0.663	0.003	0.003	0.994	0.488222
N.mossambica_1296_1371_1364_1434_1322_1339_1043_1.7546_PLA2	82	N	E	0.642	0.053	0.005	0.942	0.492
N.mossambica_1296_1371_1364_1434_1322_1339_1043_1.7546_PLA2	83	N	E	0.586	0.246	0.004	0.75	0.514333
N.mossambica_1296_1371_1364_1434_1322_1339_1043_1.7546_PLA2	84	K	E	0.455	0.858	0.002	0.139	0.505889
N.mossambica_1296_1371_1364_1434_1322_1339_1043_1.7546_PLA2	85	C	B	0.036	0.782	0.003	0.216	0.488
N.mossambica_1296_1371_1364_1434_1322_1339_1043_1.7546_PLA2	86	Q	B	0.234	0.858	0.002	0.139	0.466889
N.mossambica_1296_1371_1364_1434_1322_1339_1043_1.7546_PLA2	87	A	E	0.512	0.923	0.002	0.076	0.460667
N.mossambica_1296_1371_1364_1434_1322_1339_1043_1.7546_PLA2	88	A	B	0.284	0.923	0.002	0.076	0.424222
N.mossambica_1296_1371_1364_1434_1322_1339_1043_1.7546_PLA2	89	V	B	0.091	0.923	0.002	0.076	0.413667
N.mossambica_1296_1371_1364_1434_1322_1339_1043_1.7546_PLA2	90	C	B	0.07	0.923	0.002	0.076	0.418
N.mossambica_1296_1371_1364_1434_1322_1339_1043_1.7546_PLA2	91	N	E	0.508	0.923	0.002	0.076	0.415333
N.mossambica_1296_1371_1364_1434_1322_1339_1043_1.7546_PLA2	92	C	B	0.042	0.858	0.002	0.139	0.398556
N.mossambica_1296_1371_1364_1434_1322_1339_1043_1.7546_PLA2	93	D	B	0.126	0.923	0.002	0.076	0.388111
N.mossambica_1296_1371_1364_1434_1322_1339_1043_1.7546_PLA2	94	L	E	0.359	0.97	0.001	0.03	0.393889
N.mossambica_1296_1371_1364_1434_1322_1339_1043_1.7546_PLA2	95	V	B	0.297	0.988	0	0.012	0.382111
N.mossambica_1296_1371_1364_1434_1322_1339_1043_1.7546_PLA2	96	A	B	0.028	0.988	0	0.012	0.365556
N.mossambica_1296_1371_1364_1434_1322_1339_1043_1.7546_PLA2	97	A	B	0.047	0.97	0.001	0.03	0.385111
N.mossambica_1296_1371_1364_1434_1322_1339_1043_1.7546_PLA2	98	N	E	0.327	0.97	0.001	0.03	0.397
N.mossambica_1296_1371_1364_1434_1322_1339_1043_1.7546_PLA2	99	C	B	0.029	0.923	0.002	0.076	0.398111
N.mossambica_1296_1371_1364_1434_1322_1339_1043_1.7546_PLA2	100	F	B	0.051	0.858	0.002	0.139	0.408444
N.mossambica_1296_1371_1364_1434_1322_1339_1043_1.7546_PLA2	101	A	E	0.373	0.694	0.003	0.303	0.428889
N.mossambica_1296_1371_1364_1434_1322_1339_1043_1.7546_PLA2	102	G	E	0.605	0.502	0.002	0.495	0.445111
N.mossambica_1296_1371_1364_1434_1322_1339_1043_1.7546_PLA2	103	A	B	0.12	0.109	0.005	0.886	0.469444
N.mossambica_1296_1371_1364_1434_1322_1339_1043_1.7546_PLA2	104	R	E	0.543	0.058	0.017	0.925	0.504889
N.mossambica_1296_1371_1364_1434_1322_1339_1043_1.7546_PLA2	105	Y	B	0.221	0.018	0.047	0.935	0.525333
N.mossambica_1296_1371_1364_1434_1322_1339_1043_1.7546_PLA2	106	I	B	0.213	0.053	0.043	0.903	0.541556
N.mossambica_1296_1371_1364_1434_1322_1339_1043_1.7546_PLA2	107	D	E	0.476	0.184	0.043	0.773	0.555111
N.mossambica_1296_1371_1364_1434_1322_1339_1043_1.7546_PLA2	108	A	E	0.638	0.257	0.016	0.727	0.562778
N.mossambica_1296_1371_1364_1434_1322_1339_1043_1.7546_PLA2	109	N	E	0.368	0.257	0.016	0.727	0.567111
N.mossambica_1296_1371_1364_1434_1322_1339_1043_1.7546_PLA2	110	Y	B	0.199	0.257	0.016	0.727	0.588444
N.mossambica_1296_1371_1364_1434_1322_1339_1043_1.7546_PLA2	111	N	E	0.497	0.113	0.043	0.844	0.612778
N.mossambica_1296_1371_1364_1434_1322_1339_1043_1.7546_PLA2	112	V	B	0.227	0.058	0.017	0.925	0.613111
N.mossambica_1296_1371_1364_1434_1322_1339_1043_1.7546_PLA2	113	N	E	0.345	0.018	0.019	0.964	0.609222
N.mossambica_1296_1371_1364_1434_1322_1339_1043_1.7546_PLA2	114	L	E	0.527	0.016	0.005	0.979	0.596556
N.mossambica_1296_1371_1364_1434_1322_1339_1043_1.7546_PLA2	115	K	E	0.566	0.053	0.005	0.942	0.6
N.mossambica_1296_1371_1364_1434_1322_1339_1043_1.7546_PLA2	116	E	E	0.569	0.016	0.005	0.979	0.528556
N.mossambica_1296_1371_1364_1434_1322_1339_1043_1.7546_PLA2	117	R	E	0.445	0.053	0.005	0.942	0.468111
N.mossambica_1296_1371_1364_1434_1322_1339_1043_1.7546_PLA2	118	C	B	0.076	0.018	0.019	0.964	0.399222
N.mossambica_1296_1371_1364_1434_1322_1339_1043_1.7546_PLA2	119	Q	E	0.721	0.003	0.003	0.994	0.323778
N.mossambica_1842_2249_1387_2278_1462_1062_1333_1413_1420_2090_4.4331_PLA2	1	L	E	0.484	0.003	0.003	0.994	0.260222
N.mossambica_1842_2249_1387_2278_1462_1062_1333_1413_1420_2090_4.4331_PLA2	2	N	E	0.373	0.053	0.043	0.903	0.304111
N.mossambica_1842_2249_1387_2278_1462_1062_1333_1413_1420_2090_4.4331_PLA2	3	L	B	0.218	0.879	0.01	0.111	0.369889
N.mossambica_1842_2249_1387_2278_1462_1062_1333_1413_1420_2090_4.4331_PLA2	4	Y	E	0.255	0.879	0.01	0.111	0.421778
N.mossambica_1842_2249_1387_2278_1462_1062_1333_1413_1420_2090_4.4331_PLA2	5	Q	B	0.261	0.879	0.01	0.111	0.456667
N.mossambica_1842_2249_1387_2278_1462_1062_1333_1413_1420_2090_4.4331_PLA2	6	F	B	0.058	0.938	0.007	0.055	0.457
N.mossambica_1842_2249_1387_2278_1462_1062_1333_1413_1420_2090_4.4331_PLA2	7	K	B	0.252	0.923	0.002	0.076	0.476333
N.mossambica_1842_2249_1387_2278_1462_1062_1333_1413_1420_2090_4.4331_PLA2	8	N	E	0.387	0.923	0.002	0.076	0.468222
N.mossambica_1842_2249_1387_2278_1462_1062_1333_1413_1420_2090_4.4331_PLA2	9	M	B	0.056	0.923	0.002	0.076	0.459333
N.mossambica_1842_2249_1387_2278_1462_1062_1333_1413_1420_2090_4.4331_PLA2	10	I	B	0.034	0.938	0.007	0.055	0.431667
N.mossambica_1842_2249_1387_2278_1462_1062_1333_1413_1420_2090_4.4331_PLA2	11	H	E	0.346	0.879	0.01	0.111	0.455778
N.mossambica_1842_2249_1387_2278_1462_1062_1333_1413_1420_2090_4.4331_PLA2	12	C	B	0.2	0.879	0.01	0.111	0.447222
N.mossambica_1842_2249_1387_2278_1462_1062_1333_1413_1420_2090_4.4331_PLA2	13	T	B	0.142	0.717	0.014	0.269	0.460778
N.mossambica_1842_2249_1387_2278_1462_1062_1333_1413_1420_2090_4.4331_PLA2	14	V	B	0.126	0.257	0.016	0.727	0.484111
N.mossambica_1842_2249_1387_2278_1462_1062_1333_1413_1420_2090_4.4331_PLA2	15	P	E	0.481	0.058	0.017	0.925	0.500444
N.mossambica_1842_2249_1387_2278_1462_1062_1333_1413_1420_2090_4.4331_PLA2	16	S	E	0.489	0.018	0.019	0.964	0.498778
N.mossambica_1842_2249_1387_2278_1462_1062_1333_1413_1420_2090_4.4331_PLA2	17	R	B	0.289	0.018	0.019	0.964	0.509556
N.mossambica_1842_2249_1387_2278_1462_1062_1333_1413_1420_2090_4.4331_PLA2	18	P	B	0.113	0.058	0.017	0.925	0.509333
N.mossambica_1842_2249_1387_2278_1462_1062_1333_1413_1420_2090_4.4331_PLA2	19	W	B	0.109	0.339	0.016	0.645	0.526667
N.mossambica_1842_2249_1387_2278_1462_1062_1333_1413_1420_2090_4.4331_PLA2	20	W	B	0.212	0.354	0.048	0.598	0.515667
N.mossambica_1842_2249_1387_2278_1462_1062_1333_1413_1420_2090_4.4331_PLA2	21	H	B	0.252	0.386	0.097	0.517	0.511667
N.mossambica_1842_2249_1387_2278_1462_1062_1333_1413_1420_2090_4.4331_PLA2	22	F	B	0.076	0.428	0.171	0.402	0.497889
N.mossambica_1842_2249_1387_2278_1462_1062_1333_1413_1420_2090_4.4331_PLA2	23	A	E	0.303	0.278	0.093	0.628	0.481444
N.mossambica_1842_2249_1387_2278_1462_1062_1333_1413_1420_2090_4.4331_PLA2	24	D	E	0.415	0.191	0.086	0.723	0.484444
N.mossambica_1842_2249_1387_2278_1462_1062_1333_1413_1420_2090_4.4331_PLA2	25	Y	B	0.059	0.052	0.084	0.864	0.466
N.mossambica_1842_2249_1387_2278_1462_1062_1333_1413_1420_2090_4.4331_PLA2	26	G	B	0.049	0.019	0.141	0.84	0.452
N.mossambica_1842_2249_1387_2278_1462_1062_1333_1413_1420_2090_4.4331_PLA2	27	C	B	0.03	0.022	0.359	0.619	0.468111
N.mossambica_1842_2249_1387_2278_1462_1062_1333_1413_1420_2090_4.4331_PLA2	28	Y	B	0.091	0.021	0.451	0.528	0.481667
N.mossambica_1842_2249_1387_2278_1462_1062_1333_1413_1420_2090_4.4331_PLA2	29	C	B	0.02	0.022	0.359	0.619	0.491
N.mossambica_1842_2249_1387_2278_1462_1062_1333_1413_1420_2090_4.4331_PLA2	30	G	B	0.105	0.02	0.205	0.775	0.514222
N.mossambica_1842_2249_1387_2278_1462_1062_1333_1413_1420_2090_4.4331_PLA2	31	R	E	0.317	0.019	0.141	0.84	0.541222
N.mossambica_1842_2249_1387_2278_1462_1062_1333_1413_1420_2090_4.4331_PLA2	32	G	E	0.396	0.005	0.045	0.951	0.572
N.mossambica_1842_2249_1387_2278_1462_1062_1333_1413_1420_2090_4.4331_PLA2	33	G	B	0.302	0.005	0.045	0.951	0.579111
N.mossambica_1842_2249_1387_2278_1462_1062_1333_1413_1420_2090_4.4331_PLA2	34	T	E	0.57	0.018	0.088	0.893	0.595778
N.mossambica_1842_2249_1387_2278_1462_1062_1333_1413_1420_2090_4.4331_PLA2	35	G	E	0.479	0.018	0.047	0.935	0.623556
N.mossambica_1842_2249_1387_2278_1462_1062_1333_1413_1420_2090_4.4331_PLA2	36	T	E	0.474	0.005	0.015	0.979	0.629556
N.mossambica_1842_2249_1387_2278_1462_1062_1333_1413_1420_2090_4.4331_PLA2	37	A	E	0.284	0.018	0.047	0.935	0.612111
N.mossambica_1842_2249_1387_2278_1462_1062_1333_1413_1420_2090_4.4331_PLA2	38	V	E	0.39	0.053	0.043	0.903	0.608556
N.mossambica_1842_2249_1387_2278_1462_1062_1333_1413_1420_2090_4.4331_PLA2	39	D	E	0.461	0.018	0.047	0.935	0.590222
N.mossambica_1842_2249_1387_2278_1462_1062_1333_1413_1420_2090_4.4331_PLA2	40	D	E	0.536	0.058	0.017	0.925	0.559444
N.mossambica_1842_2249_1387_2278_1462_1062_1333_1413_1420_2090_4.4331_PLA2	41	L	E	0.272	0.115	0.016	0.868	0.534444
N.mossambica_1842_2249_1387_2278_1462_1062_1333_1413_1420_2090_4.4331_PLA2	42	D	E	0.425	0.115	0.016	0.868	0.528778
N.mossambica_1842_2249_1387_2278_1462_1062_1333_1413_1420_2090_4.4331_PLA2	43	R	E	0.352	0.354	0.048	0.598	0.527556
N.mossambica_1842_2249_1387_2278_1462_1062_1333_1413_1420_2090_4.4331_PLA2	44	C	B	0.025	0.561	0.047	0.393	0.513333
N.mossambica_1842_2249_1387_2278_1462_1062_1333_1413_1420_2090_4.4331_PLA2	45	C	B	0.038	0.605	0.105	0.29	0.497111
N.mossambica_1842_2249_1387_2278_1462_1062_1333_1413_1420_2090_4.4331_PLA2	46	Q	E	0.418	0.605	0.105	0.29	0.499444
N.mossambica_1842_2249_1387_2278_1462_1062_1333_1413_1420_2090_4.4331_PLA2	47	V	E	0.461	0.455	0.046	0.498	0.477667
N.mossambica_1842_2249_1387_2278_1462_1062_1333_1413_1420_2090_4.4331_PLA2	48	H	B	0.155	0.181	0.016	0.803	0.474778
N.mossambica_1842_2249_1387_2278_1462_1062_1333_1413_1420_2090_4.4331_PLA2	49	D	E	0.598	0.058	0.017	0.925	0.476889
N.mossambica_1842_2249_1387_2278_1462_1062_1333_1413_1420_2090_4.4331_PLA2	50	N	B	0.288	0.257	0.016	0.727	0.477556
N.mossambica_1842_2249_1387_2278_1462_1062_1333_1413_1420_2090_4.4331_PLA2	51	C	B	0.042	0.522	0.016	0.462	0.464222
N.mossambica_1842_2249_1387_2278_1462_1062_1333_1413_1420_2090_4.4331_PLA2	52	Y	B	0.146	0.879	0.01	0.111	0.473111
N.mossambica_1842_2249_1387_2278_1462_1062_1333_1413_1420_2090_4.4331_PLA2	53	G	E	0.62	0.858	0.002	0.139	0.470444
N.mossambica_1842_2249_1387_2278_1462_1062_1333_1413_1420_2090_4.4331_PLA2	54	E	E	0.402	0.879	0.01	0.111	0.481222
N.mossambica_1842_2249_1387_2278_1462_1062_1333_1413_1420_2090_4.4331_PLA2	55	A	B	0.037	0.782	0.003	0.216	0.486
N.mossambica_1842_2249_1387_2278_1462_1062_1333_1413_1420_2090_4.4331_PLA2	56	E	E	0.542	0.717	0.014	0.269	0.487667
N.mossambica_1842_2249_1387_2278_1462_1062_1333_1413_1420_2090_4.4331_PLA2	57	K	E	0.744	0.43	0.016	0.555	0.495111
N.mossambica_1842_2249_1387_2278_1462_1062_1333_1413_1420_2090_4.4331_PLA2	58	L	E	0.409	0.053	0.005	0.942	0.506889
N.mossambica_1842_2249_1387_2278_1462_1062_1333_1413_1420_2090_4.4331_PLA2	59	G	E	0.519	0.018	0.019	0.964	0.522667
N.mossambica_1842_2249_1387_2278_1462_1062_1333_1413_1420_2090_4.4331_PLA2	60	C	B	0.082	0.018	0.047	0.935	0.539444
N.mossambica_1842_2249_1387_2278_1462_1062_1333_1413_1420_2090_4.4331_PLA2	61	W	B	0.273	0.018	0.088	0.893	0.532222
N.mossambica_1842_2249_1387_2278_1462_1062_1333_1413_1420_2090_4.4331_PLA2	62	P	B	0.333	0.004	0.197	0.799	0.529889
N.mossambica_1842_2249_1387_2278_1462_1062_1333_1413_1420_2090_4.4331_PLA2	63	Y	E	0.393	0.005	0.262	0.733	0.517556
N.mossambica_1842_2249_1387_2278_1462_1062_1333_1413_1420_2090_4.4331_PLA2	64	L	B	0.195	0.004	0.42	0.576	0.512333
N.mossambica_1842_2249_1387_2278_1462_1062_1333_1413_1420_2090_4.4331_PLA2	65	T	E	0.4	0.004	0.42	0.576	0.519444
N.mossambica_1842_2249_1387_2278_1462_1062_1333_1413_1420_2090_4.4331_PLA2	66	L	E	0.421	0.004	0.616	0.381	0.497
N.mossambica_1842_2249_1387_2278_1462_1062_1333_1413_1420_2090_4.4331_PLA2	67	Y	B	0.095	0.003	0.718	0.279	0.477444
N.mossambica_1842_2249_1387_2278_1462_1062_1333_1413_1420_2090_4.4331_PLA2	68	K	E	0.441	0.002	0.816	0.182	0.47
N.mossambica_1842_2249_1387_2278_1462_1062_1333_1413_1420_2090_4.4331_PLA2	69	Y	B	0.097	0.011	0.918	0.071	0.461778
N.mossambica_1842_2249_1387_2278_1462_1062_1333_1413_1420_2090_4.4331_PLA2	70	E	E	0.415	0.011	0.918	0.071	0.460333
N.mossambica_1842_2249_1387_2278_1462_1062_1333_1413_1420_2090_4.4331_PLA2	71	C	B	0.152	0.001	0.959	0.04	0.462222
N.mossambica_1842_2249_1387_2278_1462_1062_1333_1413_1420_2090_4.4331_PLA2	72	S	E	0.546	0.002	0.816	0.182	0.449111
N.mossambica_1842_2249_1387_2278_1462_1062_1333_1413_1420_2090_4.4331_PLA2	73	Q	E	0.723	0.005	0.045	0.951	0.446
N.mossambica_1842_2249_1387_2278_1462_1062_1333_1413_1420_2090_4.4331_PLA2	74	G	E	0.528	0.005	0.015	0.979	0.425
N.mossambica_1842_2249_1387_2278_1462_1062_1333_1413_1420_2090_4.4331_PLA2	75	K	E	0.555	0.004	0.616	0.381	0.440667
N.mossambica_1842_2249_1387_2278_1462_1062_1333_1413_1420_2090_4.4331_PLA2	76	L	B	0.057	0.001	0.9	0.099	0.46
N.mossambica_1842_2249_1387_2278_1462_1062_1333_1413_1420_2090_4.4331_PLA2	77	T	E	0.388	0.001	0.9	0.099	0.469333
N.mossambica_1842_2249_1387_2278_1462_1062_1333_1413_1420_2090_4.4331_PLA2	78	C	B	0.037	0.002	0.816	0.182	0.483222
N.mossambica_1842_2249_1387_2278_1462_1062_1333_1413_1420_2090_4.4331_PLA2	79	S	E	0.492	0.005	0.336	0.66	0.488556
N.mossambica_1842_2249_1387_2278_1462_1062_1333_1413_1420_2090_4.4331_PLA2	80	G	E	0.572	0.005	0.045	0.951	0.490889
N.mossambica_1842_2249_1387_2278_1462_1062_1333_1413_1420_2090_4.4331_PLA2	81	G	E	0.664	0.003	0.003	0.994	0.496444
N.mossambica_1842_2249_1387_2278_1462_1062_1333_1413_1420_2090_4.4331_PLA2	82	N	E	0.616	0.053	0.005	0.942	0.501556
N.mossambica_1842_2249_1387_2278_1462_1062_1333_1413_1420_2090_4.4331_PLA2	83	N	E	0.571	0.321	0.003	0.675	0.522444
N.mossambica_1842_2249_1387_2278_1462_1062_1333_1413_1420_2090_4.4331_PLA2	84	K	E	0.454	0.782	0.003	0.216	0.512111
N.mossambica_1842_2249_1387_2278_1462_1062_1333_1413_1420_2090_4.4331_PLA2	85	C	B	0.041	0.782	0.003	0.216	0.495889
N.mossambica_1842_2249_1387_2278_1462_1062_1333_1413_1420_2090_4.4331_PLA2	86	Q	B	0.257	0.879	0.01	0.111	0.472222
N.mossambica_1842_2249_1387_2278_1462_1062_1333_1413_1420_2090_4.4331_PLA2	87	A	E	0.519	0.879	0.01	0.111	0.462444
N.mossambica_1842_2249_1387_2278_1462_1062_1333_1413_1420_2090_4.4331_PLA2	88	A	B	0.284	0.879	0.01	0.111	0.425667
N.mossambica_1842_2249_1387_2278_1462_1062_1333_1413_1420_2090_4.4331_PLA2	89	V	B	0.129	0.879	0.01	0.111	0.415444
N.mossambica_1842_2249_1387_2278_1462_1062_1333_1413_1420_2090_4.4331_PLA2	90	C	B	0.069	0.802	0.014	0.185	0.421333
N.mossambica_1842_2249_1387_2278_1462_1062_1333_1413_1420_2090_4.4331_PLA2	91	N	E	0.494	0.879	0.01	0.111	0.417556
N.mossambica_1842_2249_1387_2278_1462_1062_1333_1413_1420_2090_4.4331_PLA2	92	C	B	0.042	0.782	0.003	0.216	0.401333
N.mossambica_1842_2249_1387_2278_1462_1062_1333_1413_1420_2090_4.4331_PLA2	93	D	B	0.141	0.858	0.002	0.139	0.390444
N.mossambica_1842_2249_1387_2278_1462_1062_1333_1413_1420_2090_4.4331_PLA2	94	L	E	0.369	0.97	0.001	0.03	0.394111
N.mossambica_1842_2249_1387_2278_1462_1062_1333_1413_1420_2090_4.4331_PLA2	95	V	B	0.293	0.97	0.001	0.03	0.386222
N.mossambica_1842_2249_1387_2278_1462_1062_1333_1413_1420_2090_4.4331_PLA2	96	A	B	0.031	0.97	0.001	0.03	0.378556
N.mossambica_1842_2249_1387_2278_1462_1062_1333_1413_1420_2090_4.4331_PLA2	97	A	B	0.054	0.97	0.001	0.03	0.407889
N.mossambica_1842_2249_1387_2278_1462_1062_1333_1413_1420_2090_4.4331_PLA2	98	N	E	0.335	0.923	0.002	0.076	0.424444
N.mossambica_1842_2249_1387_2278_1462_1062_1333_1413_1420_2090_4.4331_PLA2	99	C	B	0.03	0.858	0.002	0.139	0.428667
N.mossambica_1842_2249_1387_2278_1462_1062_1333_1413_1420_2090_4.4331_PLA2	100	F	B	0.059	0.694	0.003	0.303	0.431556
N.mossambica_1842_2249_1387_2278_1462_1062_1333_1413_1420_2090_4.4331_PLA2	101	A	E	0.352	0.406	0.004	0.59	0.451222
N.mossambica_1842_2249_1387_2278_1462_1062_1333_1413_1420_2090_4.4331_PLA2	102	G	E	0.623	0.246	0.004	0.75	0.467444
N.mossambica_1842_2249_1387_2278_1462_1062_1333_1413_1420_2090_4.4331_PLA2	103	A	B	0.162	0.053	0.005	0.942	0.489333
N.mossambica_1842_2249_1387_2278_1462_1062_1333_1413_1420_2090_4.4331_PLA2	104	P	E	0.566	0.018	0.019	0.964	0.517667
N.mossambica_1842_2249_1387_2278_1462_1062_1333_1413_1420_2090_4.4331_PLA2	105	Y	B	0.245	0.018	0.019	0.964	0.530444
N.mossambica_1842_2249_1387_2278_1462_1062_1333_1413_1420_2090_4.4331_PLA2	106	I	B	0.233	0.053	0.043	0.903	0.539222
N.mossambica_1842_2249_1387_2278_1462_1062_1333_1413_1420_2090_4.4331_PLA2	107	D	E	0.495	0.184	0.043	0.773	0.547667
N.mossambica_1842_2249_1387_2278_1462_1062_1333_1413_1420_2090_4.4331_PLA2	108	A	E	0.594	0.339	0.016	0.645	0.550889
N.mossambica_1842_2249_1387_2278_1462_1062_1333_1413_1420_2090_4.4331_PLA2	109	N	E	0.314	0.257	0.016	0.727	0.563889
N.mossambica_1842_2249_1387_2278_1462_1062_1333_1413_1420_2090_4.4331_PLA2	110	Y	B	0.19	0.268	0.043	0.689	0.586222
N.mossambica_1842_2249_1387_2278_1462_1062_1333_1413_1420_2090_4.4331_PLA2	111	N	E	0.468	0.184	0.043	0.773	0.610222
N.mossambica_1842_2249_1387_2278_1462_1062_1333_1413_1420_2090_4.4331_PLA2	112	V	B	0.184	0.113	0.043	0.844	0.610333
N.mossambica_1842_2249_1387_2278_1462_1062_1333_1413_1420_2090_4.4331_PLA2	113	N	E	0.397	0.058	0.017	0.925	0.611444
N.mossambica_1842_2249_1387_2278_1462_1062_1333_1413_1420_2090_4.4331_PLA2	114	L	E	0.531	0.016	0.005	0.979	0.598667
N.mossambica_1842_2249_1387_2278_1462_1062_1333_1413_1420_2090_4.4331_PLA2	115	K	E	0.569	0.016	0.005	0.979	0.599556
N.mossambica_1842_2249_1387_2278_1462_1062_1333_1413_1420_2090_4.4331_PLA2	116	E	E	0.556	0.016	0.005	0.979	0.527222
N.mossambica_1842_2249_1387_2278_1462_1062_1333_1413_1420_2090_4.4331_PLA2	117	R	E	0.413	0.016	0.005	0.979	0.467556
N.mossambica_1842_2249_1387_2278_1462_1062_1333_1413_1420_2090_4.4331_PLA2	118	C	B	0.072	0.018	0.019	0.964	0.397889
N.mossambica_1842_2249_1387_2278_1462_1062_1333_1413_1420_2090_4.4331_PLA2	119	Q	E	0.726	0.003	0.003	0.994	0.322444
N.mossambica_1851_2222_931_1483_1321_2417_1416_974_1057_0.4912_PLA2	1	N	E	0.702	0.003	0.003	0.994	0.251222
N.mossambica_1851_2222_931_1483_1321_2417_1416_974_1057_0.4912_PLA2	2	L	E	0.254	0.782	0.003	0.216	0.316556
N.mossambica_1851_2222_931_1483_1321_2417_1416_974_1057_0.4912_PLA2	3	Y	E	0.278	0.858	0.002	0.139	0.368111
N.mossambica_1851_2222_931_1483_1321_2417_1416_974_1057_0.4912_PLA2	4	Q	E	0.335	0.879	0.01	0.111	0.404111
N.mossambica_1851_2222_931_1483_1321_2417_1416_974_1057_0.4912_PLA2	5	F	B	0.058	0.938	0.007	0.055	0.437778
N.mossambica_1851_2222_931_1483_1321_2417_1416_974_1057_0.4912_PLA2	6	K	B	0.228	0.938	0.007	0.055	0.462556
N.mossambica_1851_2222_931_1483_1321_2417_1416_974_1057_0.4912_PLA2	7	N	E	0.411	0.923	0.002	0.076	0.457889
N.mossambica_1851_2222_931_1483_1321_2417_1416_974_1057_0.4912_PLA2	8	M	B	0.06	0.97	0.001	0.03	0.449111
N.mossambica_1851_2222_931_1483_1321_2417_1416_974_1057_0.4912_PLA2	9	I	B	0.037	0.938	0.007	0.055	0.433
N.mossambica_1851_2222_931_1483_1321_2417_1416_974_1057_0.4912_PLA2	10	H	E	0.36	0.938	0.007	0.055	0.456111
N.mossambica_1851_2222_931_1483_1321_2417_1416_974_1057_0.4912_PLA2	11	C	B	0.201	0.879	0.01	0.111	0.449222
N.mossambica_1851_2222_931_1483_1321_2417_1416_974_1057_0.4912_PLA2	12	T	B	0.138	0.717	0.014	0.269	0.461
N.mossambica_1851_2222_931_1483_1321_2417_1416_974_1057_0.4912_PLA2	13	V	B	0.114	0.339	0.016	0.645	0.479556
N.mossambica_1851_2222_931_1483_1321_2417_1416_974_1057_0.4912_PLA2	14	P	E	0.438	0.058	0.017	0.925	0.496
N.mossambica_1851_2222_931_1483_1321_2417_1416_974_1057_0.4912_PLA2	15	S	E	0.407	0.018	0.019	0.964	0.497111
N.mossambica_1851_2222_931_1483_1321_2417_1416_974_1057_0.4912_PLA2	16	R	B	0.277	0.018	0.019	0.964	0.505
N.mossambica_1851_2222_931_1483_1321_2417_1416_974_1057_0.4912_PLA2	17	P	B	0.082	0.115	0.016	0.868	0.507444
N.mossambica_1851_2222_931_1483_1321_2417_1416_974_1057_0.4912_PLA2	18	W	B	0.12	0.339	0.016	0.645	0.526333
N.mossambica_1851_2222_931_1483_1321_2417_1416_974_1057_0.4912_PLA2	19	W	B	0.217	0.354	0.048	0.598	0.519111
N.mossambica_1851_2222_931_1483_1321_2417_1416_974_1057_0.4912_PLA2	20	H	B	0.23	0.386	0.097	0.517	0.513444
N.mossambica_1851_2222_931_1483_1321_2417_1416_974_1057_0.4912_PLA2	21	F	B	0.071	0.386	0.097	0.517	0.501556
N.mossambica_1851_2222_931_1483_1321_2417_1416_974_1057_0.4912_PLA2	22	A	E	0.279	0.278	0.093	0.628	0.489444
N.mossambica_1851_2222_931_1483_1321_2417_1416_974_1057_0.4912_PLA2	23	D	E	0.366	0.191	0.086	0.723	0.491667
N.mossambica_1851_2222_931_1483_1321_2417_1416_974_1057_0.4912_PLA2	24	Y	B	0.053	0.052	0.084	0.864	0.472333
N.mossambica_1851_2222_931_1483_1321_2417_1416_974_1057_0.4912_PLA2	25	G	B	0.047	0.019	0.141	0.84	0.462222
N.mossambica_1851_2222_931_1483_1321_2417_1416_974_1057_0.4912_PLA2	26	C	B	0.028	0.022	0.359	0.619	0.469556
N.mossambica_1851_2222_931_1483_1321_2417_1416_974_1057_0.4912_PLA2	27	Y	B	0.086	0.021	0.451	0.528	0.472333
N.mossambica_1851_2222_931_1483_1321_2417_1416_974_1057_0.4912_PLA2	28	C	B	0.021	0.022	0.359	0.619	0.470889
N.mossambica_1851_2222_931_1483_1321_2417_1416_974_1057_0.4912_PLA2	29	G	B	0.102	0.02	0.205	0.775	0.497778
N.mossambica_1851_2222_931_1483_1321_2417_1416_974_1057_0.4912_PLA2	30	R	E	0.29	0.018	0.088	0.893	0.523333
N.mossambica_1851_2222_931_1483_1321_2417_1416_974_1057_0.4912_PLA2	31	G	E	0.381	0.005	0.045	0.951	0.556333
N.mossambica_1851_2222_931_1483_1321_2417_1416_974_1057_0.4912_PLA2	32	G	B	0.262	0.005	0.045	0.951	0.570444
N.mossambica_1851_2222_931_1483_1321_2417_1416_974_1057_0.4912_PLA2	33	K	E	0.568	0.018	0.047	0.935	0.588889
N.mossambica_1851_2222_931_1483_1321_2417_1416_974_1057_0.4912_PLA2	34	G	E	0.455	0.018	0.047	0.935	0.618667
N.mossambica_1851_2222_931_1483_1321_2417_1416_974_1057_0.4912_PLA2	35	T	E	0.401	0.005	0.045	0.951	0.629556
N.mossambica_1851_2222_931_1483_1321_2417_1416_974_1057_0.4912_PLA2	36	A	E	0.299	0.018	0.047	0.935	0.619889
N.mossambica_1851_2222_931_1483_1321_2417_1416_974_1057_0.4912_PLA2	37	V	E	0.401	0.053	0.043	0.903	0.621778
N.mossambica_1851_2222_931_1483_1321_2417_1416_974_1057_0.4912_PLA2	38	D	E	0.441	0.053	0.043	0.903	0.599222
N.mossambica_1851_2222_931_1483_1321_2417_1416_974_1057_0.4912_PLA2	39	D	E	0.475	0.113	0.043	0.844	0.567556
N.mossambica_1851_2222_931_1483_1321_2417_1416_974_1057_0.4912_PLA2	40	L	B	0.27	0.184	0.043	0.773	0.536889
N.mossambica_1851_2222_931_1483_1321_2417_1416_974_1057_0.4912_PLA2	41	D	E	0.319	0.184	0.043	0.773	0.525333
N.mossambica_1851_2222_931_1483_1321_2417_1416_974_1057_0.4912_PLA2	42	R	E	0.355	0.354	0.048	0.598	0.523667
N.mossambica_1851_2222_931_1483_1321_2417_1416_974_1057_0.4912_PLA2	43	C	B	0.037	0.502	0.102	0.396	0.505444
N.mossambica_1851_2222_931_1483_1321_2417_1416_974_1057_0.4912_PLA2	44	C	B	0.04	0.538	0.173	0.289	0.489111
N.mossambica_1851_2222_931_1483_1321_2417_1416_974_1057_0.4912_PLA2	45	Q	E	0.34	0.428	0.171	0.402	0.491222
N.mossambica_1851_2222_931_1483_1321_2417_1416_974_1057_0.4912_PLA2	46	V	E	0.413	0.191	0.086	0.723	0.472222
N.mossambica_1851_2222_931_1483_1321_2417_1416_974_1057_0.4912_PLA2	47	H	B	0.153	0.053	0.043	0.903	0.470889
N.mossambica_1851_2222_931_1483_1321_2417_1416_974_1057_0.4912_PLA2	48	D	E	0.617	0.058	0.017	0.925	0.473444
N.mossambica_1851_2222_931_1483_1321_2417_1416_974_1057_0.4912_PLA2	49	N	B	0.246	0.181	0.016	0.803	0.473556
N.mossambica_1851_2222_931_1483_1321_2417_1416_974_1057_0.4912_PLA2	50	C	B	0.044	0.522	0.016	0.462	0.458667
N.mossambica_1851_2222_931_1483_1321_2417_1416_974_1057_0.4912_PLA2	51	Y	B	0.147	0.858	0.002	0.139	0.463778
N.mossambica_1851_2222_931_1483_1321_2417_1416_974_1057_0.4912_PLA2	52	G	E	0.606	0.858	0.002	0.139	0.462778
N.mossambica_1851_2222_931_1483_1321_2417_1416_974_1057_0.4912_PLA2	53	E	E	0.435	0.858	0.002	0.139	0.474778
N.mossambica_1851_2222_931_1483_1321_2417_1416_974_1057_0.4912_PLA2	54	A	B	0.042	0.782	0.003	0.216	0.480333
N.mossambica_1851_2222_931_1483_1321_2417_1416_974_1057_0.4912_PLA2	55	E	E	0.571	0.694	0.003	0.303	0.483
N.mossambica_1851_2222_931_1483_1321_2417_1416_974_1057_0.4912_PLA2	56	K	E	0.739	0.502	0.002	0.495	0.491778
N.mossambica_1851_2222_931_1483_1321_2417_1416_974_1057_0.4912_PLA2	57	L	E	0.428	0.109	0.005	0.886	0.506667
N.mossambica_1851_2222_931_1483_1321_2417_1416_974_1057_0.4912_PLA2	58	G	E	0.537	0.018	0.019	0.964	0.527333
N.mossambica_1851_2222_931_1483_1321_2417_1416_974_1057_0.4912_PLA2	59	C	B	0.132	0.018	0.047	0.935	0.547333
N.mossambica_1851_2222_931_1483_1321_2417_1416_974_1057_0.4912_PLA2	60	W	B	0.278	0.004	0.085	0.91	0.543444
N.mossambica_1851_2222_931_1483_1321_2417_1416_974_1057_0.4912_PLA2	61	P	E	0.39	0.004	0.197	0.799	0.540889
N.mossambica_1851_2222_931_1483_1321_2417_1416_974_1057_0.4912_PLA2	62	Y	E	0.406	0.005	0.336	0.66	0.525889
N.mossambica_1851_2222_931_1483_1321_2417_1416_974_1057_0.4912_PLA2	63	L	B	0.218	0.004	0.42	0.576	0.518778
N.mossambica_1851_2222_931_1483_1321_2417_1416_974_1057_0.4912_PLA2	64	T	E	0.441	0.004	0.42	0.576	0.521444
N.mossambica_1851_2222_931_1483_1321_2417_1416_974_1057_0.4912_PLA2	65	L	E	0.428	0.004	0.514	0.481	0.497111
N.mossambica_1851_2222_931_1483_1321_2417_1416_974_1057_0.4912_PLA2	66	Y	B	0.09	0.004	0.616	0.381	0.476889
N.mossambica_1851_2222_931_1483_1321_2417_1416_974_1057_0.4912_PLA2	67	K	E	0.429	0.002	0.816	0.182	0.465778
N.mossambica_1851_2222_931_1483_1321_2417_1416_974_1057_0.4912_PLA2	68	Y	B	0.089	0.011	0.918	0.071	0.454778
N.mossambica_1851_2222_931_1483_1321_2417_1416_974_1057_0.4912_PLA2	69	E	E	0.437	0.011	0.918	0.071	0.453556
N.mossambica_1851_2222_931_1483_1321_2417_1416_974_1057_0.4912_PLA2	70	C	B	0.158	0.001	0.9	0.099	0.454889
N.mossambica_1851_2222_931_1483_1321_2417_1416_974_1057_0.4912_PLA2	71	S	E	0.572	0.002	0.816	0.182	0.446111
N.mossambica_1851_2222_931_1483_1321_2417_1416_974_1057_0.4912_PLA2	72	Q	E	0.732	0.005	0.045	0.951	0.444778
N.mossambica_1851_2222_931_1483_1321_2417_1416_974_1057_0.4912_PLA2	73	G	E	0.45	0.005	0.015	0.979	0.424778
N.mossambica_1851_2222_931_1483_1321_2417_1416_974_1057_0.4912_PLA2	74	K	E	0.533	0.004	0.616	0.381	0.438
N.mossambica_1851_2222_931_1483_1321_2417_1416_974_1057_0.4912_PLA2	75	L	B	0.047	0.002	0.816	0.182	0.454
N.mossambica_1851_2222_931_1483_1321_2417_1416_974_1057_0.4912_PLA2	76	T	E	0.379	0.001	0.9	0.099	0.464222
N.mossambica_1851_2222_931_1483_1321_2417_1416_974_1057_0.4912_PLA2	77	C	B	0.03	0.002	0.816	0.182	0.476778
N.mossambica_1851_2222_931_1483_1321_2417_1416_974_1057_0.4912_PLA2	78	S	E	0.491	0.005	0.262	0.733	0.480444
N.mossambica_1851_2222_931_1483_1321_2417_1416_974_1057_0.4912_PLA2	79	G	E	0.612	0.005	0.045	0.951	0.482556
N.mossambica_1851_2222_931_1483_1321_2417_1416_974_1057_0.4912_PLA2	80	G	E	0.663	0.003	0.003	0.994	0.487111
N.mossambica_1851_2222_931_1483_1321_2417_1416_974_1057_0.4912_PLA2	81	N	E	0.648	0.053	0.005	0.942	0.489889
N.mossambica_1851_2222_931_1483_1321_2417_1416_974_1057_0.4912_PLA2	82	N	E	0.579	0.246	0.004	0.75	0.511444
N.mossambica_1851_2222_931_1483_1321_2417_1416_974_1057_0.4912_PLA2	83	K	E	0.447	0.782	0.003	0.216	0.502778
N.mossambica_1851_2222_931_1483_1321_2417_1416_974_1057_0.4912_PLA2	84	C	B	0.035	0.782	0.003	0.216	0.481111
N.mossambica_1851_2222_931_1483_1321_2417_1416_974_1057_0.4912_PLA2	85	E	B	0.233	0.858	0.002	0.139	0.460667
N.mossambica_1851_2222_931_1483_1321_2417_1416_974_1057_0.4912_PLA2	86	A	E	0.506	0.938	0.007	0.055	0.455
N.mossambica_1851_2222_931_1483_1321_2417_1416_974_1057_0.4912_PLA2	87	A	B	0.259	0.923	0.002	0.076	0.418667
N.mossambica_1851_2222_931_1483_1321_2417_1416_974_1057_0.4912_PLA2	88	V	B	0.085	0.923	0.002	0.076	0.407778
N.mossambica_1851_2222_931_1483_1321_2417_1416_974_1057_0.4912_PLA2	89	C	B	0.069	0.923	0.002	0.076	0.412556
N.mossambica_1851_2222_931_1483_1321_2417_1416_974_1057_0.4912_PLA2	90	N	E	0.509	0.923	0.002	0.076	0.411333
N.mossambica_1851_2222_931_1483_1321_2417_1416_974_1057_0.4912_PLA2	91	C	B	0.041	0.858	0.002	0.139	0.395889
N.mossambica_1851_2222_931_1483_1321_2417_1416_974_1057_0.4912_PLA2	92	D	B	0.121	0.923	0.002	0.076	0.386
N.mossambica_1851_2222_931_1483_1321_2417_1416_974_1057_0.4912_PLA2	93	L	E	0.354	0.97	0.001	0.03	0.396444
N.mossambica_1851_2222_931_1483_1321_2417_1416_974_1057_0.4912_PLA2	94	V	E	0.309	0.988	0	0.012	0.385444
N.mossambica_1851_2222_931_1483_1321_2417_1416_974_1057_0.4912_PLA2	95	A	B	0.028	0.988	0	0.012	0.369778
N.mossambica_1851_2222_931_1483_1321_2417_1416_974_1057_0.4912_PLA2	96	A	B	0.043	0.97	0.001	0.03	0.390111
N.mossambica_1851_2222_931_1483_1321_2417_1416_974_1057_0.4912_PLA2	97	N	E	0.33	0.97	0.001	0.03	0.402333
N.mossambica_1851_2222_931_1483_1321_2417_1416_974_1057_0.4912_PLA2	98	C	B	0.031	0.923	0.002	0.076	0.406333
N.mossambica_1851_2222_931_1483_1321_2417_1416_974_1057_0.4912_PLA2	99	F	B	0.052	0.858	0.002	0.139	0.408333
N.mossambica_1851_2222_931_1483_1321_2417_1416_974_1057_0.4912_PLA2	100	A	E	0.339	0.694	0.003	0.303	0.430444
N.mossambica_1851_2222_931_1483_1321_2417_1416_974_1057_0.4912_PLA2	101	G	E	0.603	0.502	0.002	0.495	0.447111
N.mossambica_1851_2222_931_1483_1321_2417_1416_974_1057_0.4912_PLA2	102	A	B	0.149	0.109	0.005	0.886	0.470667
N.mossambica_1851_2222_931_1483_1321_2417_1416_974_1057_0.4912_PLA2	103	P	E	0.562	0.058	0.017	0.925	0.500778
N.mossambica_1851_2222_931_1483_1321_2417_1416_974_1057_0.4912_PLA2	104	Y	B	0.207	0.018	0.047	0.935	0.519111
N.mossambica_1851_2222_931_1483_1321_2417_1416_974_1057_0.4912_PLA2	105	I	B	0.218	0.053	0.043	0.903	0.535111
N.mossambica_1851_2222_931_1483_1321_2417_1416_974_1057_0.4912_PLA2	106	D	E	0.533	0.184	0.043	0.773	0.546889
N.mossambica_1851_2222_931_1483_1321_2417_1416_974_1057_0.4912_PLA2	107	A	E	0.636	0.257	0.016	0.727	0.552111
N.mossambica_1851_2222_931_1483_1321_2417_1416_974_1057_0.4912_PLA2	108	N	E	0.339	0.257	0.016	0.727	0.564444
N.mossambica_1851_2222_931_1483_1321_2417_1416_974_1057_0.4912_PLA2	109	Y	B	0.2	0.257	0.016	0.727	0.583556
N.mossambica_1851_2222_931_1483_1321_2417_1416_974_1057_0.4912_PLA2	110	N	E	0.491	0.184	0.043	0.773	0.605889
N.mossambica_1851_2222_931_1483_1321_2417_1416_974_1057_0.4912_PLA2	111	V	B	0.209	0.058	0.017	0.925	0.605556
N.mossambica_1851_2222_931_1483_1321_2417_1416_974_1057_0.4912_PLA2	112	N	E	0.367	0.018	0.019	0.964	0.606
N.mossambica_1851_2222_931_1483_1321_2417_1416_974_1057_0.4912_PLA2	113	L	E	0.516	0.016	0.005	0.979	0.594778
N.mossambica_1851_2222_931_1483_1321_2417_1416_974_1057_0.4912_PLA2	114	K	E	0.538	0.016	0.005	0.979	0.597778
N.mossambica_1851_2222_931_1483_1321_2417_1416_974_1057_0.4912_PLA2	115	E	E	0.562	0.016	0.005	0.979	0.527444
N.mossambica_1851_2222_931_1483_1321_2417_1416_974_1057_0.4912_PLA2	116	R	E	0.447	0.016	0.005	0.979	0.466111
N.mossambica_1851_2222_931_1483_1321_2417_1416_974_1057_0.4912_PLA2	117	C	B	0.077	0.018	0.019	0.964	0.397111
N.mossambica_1851_2222_931_1483_1321_2417_1416_974_1057_0.4912_PLA2	118	Q	E	0.729	0.003	0.003	0.994	0.321667
N.mossambica_2269_0.324915476505541_PLA2	1	N	E	0.726	0.003	0.003	0.994	0.251667
N.mossambica_2269_0.324915476505541_PLA2	2	L	E	0.266	0.802	0.014	0.185	0.318
N.mossambica_2269_0.324915476505541_PLA2	3	Y	E	0.282	0.879	0.01	0.111	0.370556
N.mossambica_2269_0.324915476505541_PLA2	4	Q	E	0.332	0.879	0.01	0.111	0.408667
N.mossambica_2269_0.324915476505541_PLA2	5	F	B	0.058	0.938	0.007	0.055	0.443889
N.mossambica_2269_0.324915476505541_PLA2	6	K	B	0.241	0.938	0.007	0.055	0.467556
N.mossambica_2269_0.324915476505541_PLA2	7	N	E	0.389	0.938	0.007	0.055	0.465444
N.mossambica_2269_0.324915476505541_PLA2	8	M	B	0.057	0.975	0.003	0.022	0.454556
N.mossambica_2269_0.324915476505541_PLA2	9	I	B	0.032	0.938	0.007	0.055	0.434667
N.mossambica_2269_0.324915476505541_PLA2	10	Q	E	0.318	0.938	0.007	0.055	0.454444
N.mossambica_2269_0.324915476505541_PLA2	11	C	B	0.173	0.879	0.01	0.111	0.447222
N.mossambica_2269_0.324915476505541_PLA2	12	T	B	0.134	0.802	0.014	0.185	0.456778
N.mossambica_2269_0.324915476505541_PLA2	13	V	B	0.088	0.339	0.016	0.645	0.479889
N.mossambica_2269_0.324915476505541_PLA2	14	P	E	0.411	0.058	0.017	0.925	0.496
N.mossambica_2269_0.324915476505541_PLA2	15	N	E	0.632	0.016	0.005	0.979	0.496778
N.mossambica_2269_0.324915476505541_PLA2	16	R	B	0.289	0.018	0.019	0.964	0.504111
N.mossambica_2269_0.324915476505541_PLA2	17	S	B	0.111	0.016	0.005	0.979	0.509111
N.mossambica_2269_0.324915476505541_PLA2	18	W	B	0.09	0.257	0.016	0.727	0.531889
N.mossambica_2269_0.324915476505541_PLA2	19	W	B	0.227	0.268	0.043	0.689	0.525667
N.mossambica_2269_0.324915476505541_PLA2	20	D	B	0.246	0.386	0.097	0.517	0.521333
N.mossambica_2269_0.324915476505541_PLA2	21	F	B	0.079	0.386	0.097	0.517	0.510444
N.mossambica_2269_0.324915476505541_PLA2	22	A	E	0.281	0.278	0.093	0.628	0.492
N.mossambica_2269_0.324915476505541_PLA2	23	D	E	0.363	0.191	0.086	0.723	0.492556
N.mossambica_2269_0.324915476505541_PLA2	24	Y	B	0.051	0.052	0.084	0.864	0.476667
N.mossambica_2269_0.324915476505541_PLA2	25	G	B	0.044	0.019	0.141	0.84	0.463333
N.mossambica_2269_0.324915476505541_PLA2	26	C	B	0.026	0.022	0.359	0.619	0.472667
N.mossambica_2269_0.324915476505541_PLA2	27	Y	B	0.072	0.021	0.451	0.528	0.472333
N.mossambica_2269_0.324915476505541_PLA2	28	C	B	0.021	0.022	0.359	0.619	0.472778
N.mossambica_2269_0.324915476505541_PLA2	29	G	B	0.075	0.02	0.205	0.775	0.493889
N.mossambica_2269_0.324915476505541_PLA2	30	R	E	0.333	0.018	0.088	0.893	0.517333
N.mossambica_2269_0.324915476505541_PLA2	31	G	E	0.283	0.005	0.015	0.979	0.545222
N.mossambica_2269_0.324915476505541_PLA2	32	G	B	0.245	0.005	0.015	0.979	0.559778
N.mossambica_2269_0.324915476505541_PLA2	33	S	E	0.6	0.018	0.047	0.935	0.574111
N.mossambica_2269_0.324915476505541_PLA2	34	G	E	0.408	0.018	0.047	0.935	0.604444
N.mossambica_2269_0.324915476505541_PLA2	35	T	E	0.446	0.005	0.015	0.979	0.615667
N.mossambica_2269_0.324915476505541_PLA2	36	P	E	0.304	0.018	0.047	0.935	0.613333
N.mossambica_2269_0.324915476505541_PLA2	37	V	E	0.441	0.053	0.043	0.903	0.619556
N.mossambica_2269_0.324915476505541_PLA2	38	D	E	0.492	0.053	0.043	0.903	0.607667
N.mossambica_2269_0.324915476505541_PLA2	39	D	E	0.532	0.053	0.043	0.903	0.582222
N.mossambica_2269_0.324915476505541_PLA2	40	L	E	0.312	0.113	0.087	0.8	0.566
N.mossambica_2269_0.324915476505541_PLA2	41	D	E	0.321	0.191	0.086	0.723	0.560667
N.mossambica_2269_0.324915476505541_PLA2	42	R	E	0.337	0.278	0.093	0.628	0.562778
N.mossambica_2269_0.324915476505541_PLA2	43	C	B	0.04	0.278	0.093	0.628	0.546222
N.mossambica_2269_0.324915476505541_PLA2	44	C	B	0.059	0.307	0.165	0.527	0.530889
N.mossambica_2269_0.324915476505541_PLA2	45	Q	E	0.392	0.191	0.086	0.723	0.528556
N.mossambica_2269_0.324915476505541_PLA2	46	V	E	0.393	0.113	0.043	0.844	0.507111
N.mossambica_2269_0.324915476505541_PLA2	47	H	B	0.19	0.058	0.017	0.925	0.498556
N.mossambica_2269_0.324915476505541_PLA2	48	D	E	0.572	0.058	0.017	0.925	0.506222
N.mossambica_2269_0.324915476505541_PLA2	49	N	B	0.22	0.339	0.016	0.645	0.501
N.mossambica_2269_0.324915476505541_PLA2	50	C	B	0.036	0.622	0.015	0.363	0.483444
N.mossambica_2269_0.324915476505541_PLA2	51	Y	B	0.111	0.858	0.002	0.139	0.488222
N.mossambica_2269_0.324915476505541_PLA2	52	D	E	0.551	0.923	0.002	0.076	0.484556
N.mossambica_2269_0.324915476505541_PLA2	53	E	E	0.337	0.858	0.002	0.139	0.483889
N.mossambica_2269_0.324915476505541_PLA2	54	A	B	0.041	0.858	0.002	0.139	0.484333
N.mossambica_2269_0.324915476505541_PLA2	55	E	E	0.507	0.782	0.003	0.216	0.504111
N.mossambica_2269_0.324915476505541_PLA2	56	K	E	0.729	0.622	0.015	0.363	0.495778
N.mossambica_2269_0.324915476505541_PLA2	57	I	B	0.196	0.176	0.004	0.82	0.496222
N.mossambica_2269_0.324915476505541_PLA2	58	S	E	0.575	0.016	0.005	0.979	0.504333
N.mossambica_2269_0.324915476505541_PLA2	59	R	E	0.431	0.018	0.019	0.964	0.522
N.mossambica_2269_0.324915476505541_PLA2	60	C	B	0.054	0.018	0.088	0.893	0.514444
N.mossambica_2269_0.324915476505541_PLA2	61	W	B	0.252	0.004	0.138	0.858	0.525889
N.mossambica_2269_0.324915476505541_PLA2	62	P	B	0.267	0.005	0.336	0.66	0.520222
N.mossambica_2269_0.324915476505541_PLA2	63	Y	E	0.309	0.004	0.514	0.481	0.521222
N.mossambica_2269_0.324915476505541_PLA2	64	F	B	0.259	0.004	0.616	0.381	0.508444
N.mossambica_2269_0.324915476505541_PLA2	65	K	E	0.363	0.004	0.514	0.481	0.508222
N.mossambica_2269_0.324915476505541_PLA2	66	T	E	0.398	0.004	0.514	0.481	0.492
N.mossambica_2269_0.324915476505541_PLA2	67	Y	B	0.107	0.004	0.616	0.381	0.476111
N.mossambica_2269_0.324915476505541_PLA2	68	S	E	0.428	0.002	0.816	0.182	0.466778
N.mossambica_2269_0.324915476505541_PLA2	69	Y	B	0.1	0.001	0.9	0.099	0.462444
N.mossambica_2269_0.324915476505541_PLA2	70	E	E	0.418	0.011	0.918	0.071	0.452111
N.mossambica_2269_0.324915476505541_PLA2	71	C	B	0.131	0.001	0.9	0.099	0.450444
N.mossambica_2269_0.324915476505541_PLA2	72	S	E	0.569	0.003	0.718	0.279	0.436667
N.mossambica_2269_0.324915476505541_PLA2	73	Q	E	0.721	0.005	0.045	0.951	0.432667
N.mossambica_2269_0.324915476505541_PLA2	74	G	E	0.514	0.005	0.015	0.979	0.415222
N.mossambica_2269_0.324915476505541_PLA2	75	T	E	0.521	0.004	0.514	0.481	0.432667
N.mossambica_2269_0.324915476505541_PLA2	76	L	B	0.063	0.002	0.816	0.182	0.455667
N.mossambica_2269_0.324915476505541_PLA2	77	T	E	0.347	0.001	0.9	0.099	0.466
N.mossambica_2269_0.324915476505541_PLA2	78	C	B	0.037	0.002	0.816	0.182	0.470333
N.mossambica_2269_0.324915476505541_PLA2	79	K	E	0.438	0.005	0.336	0.66	0.483667
N.mossambica_2269_0.324915476505541_PLA2	80	N	E	0.678	0.004	0.085	0.91	0.494889
N.mossambica_2269_0.324915476505541_PLA2	81	G	E	0.585	0.003	0.003	0.994	0.497
N.mossambica_2269_0.324915476505541_PLA2	82	N	E	0.647	0.053	0.005	0.942	0.497778
N.mossambica_2269_0.324915476505541_PLA2	83	N	E	0.56	0.176	0.004	0.82	0.516778
N.mossambica_2269_0.324915476505541_PLA2	84	A	E	0.433	0.782	0.003	0.216	0.501111
N.mossambica_2269_0.324915476505541_PLA2	85	C	B	0.036	0.858	0.002	0.139	0.476
N.mossambica_2269_0.324915476505541_PLA2	86	A	B	0.226	0.879	0.01	0.111	0.458889
N.mossambica_2269_0.324915476505541_PLA2	87	A	E	0.498	0.938	0.007	0.055	0.457222
N.mossambica_2269_0.324915476505541_PLA2	88	A	B	0.253	0.938	0.007	0.055	0.419667
N.mossambica_2269_0.324915476505541_PLA2	89	V	B	0.093	0.923	0.002	0.076	0.404889
N.mossambica_2269_0.324915476505541_PLA2	90	C	B	0.064	0.923	0.002	0.076	0.413556
N.mossambica_2269_0.324915476505541_PLA2	91	D	E	0.461	0.923	0.002	0.076	0.420333
N.mossambica_2269_0.324915476505541_PLA2	92	C	B	0.036	0.923	0.002	0.076	0.408222
N.mossambica_2269_0.324915476505541_PLA2	93	D	B	0.111	0.923	0.002	0.076	0.399222
N.mossambica_2269_0.324915476505541_PLA2	94	R	E	0.361	0.988	0	0.012	0.411556
N.mossambica_2269_0.324915476505541_PLA2	95	L	B	0.216	0.988	0	0.012	0.403778
N.mossambica_2269_0.324915476505541_PLA2	96	A	B	0.026	0.988	0	0.012	0.387111
N.mossambica_2269_0.324915476505541_PLA2	97	A	B	0.037	0.988	0	0.012	0.407111
N.mossambica_2269_0.324915476505541_PLA2	98	I	E	0.269	0.97	0.001	0.03	0.420333
N.mossambica_2269_0.324915476505541_PLA2	99	C	B	0.02	0.97	0.001	0.03	0.419222
N.mossambica_2269_0.324915476505541_PLA2	100	F	B	0.062	0.858	0.002	0.139	0.425333
N.mossambica_2269_0.324915476505541_PLA2	101	A	E	0.337	0.694	0.003	0.303	0.447111
N.mossambica_2269_0.324915476505541_PLA2	102	G	E	0.557	0.406	0.004	0.59	0.471
N.mossambica_2269_0.324915476505541_PLA2	103	A	B	0.135	0.053	0.005	0.942	0.492222
N.mossambica_2269_0.324915476505541_PLA2	104	P	E	0.534	0.058	0.017	0.925	0.531111
N.mossambica_2269_0.324915476505541_PLA2	105	Y	B	0.241	0.053	0.043	0.903	0.564111
N.mossambica_2269_0.324915476505541_PLA2	106	N	B	0.203	0.053	0.043	0.903	0.590778
N.mossambica_2269_0.324915476505541_PLA2	107	N	E	0.522	0.268	0.043	0.689	0.602333
N.mossambica_2269_0.324915476505541_PLA2	108	N	E	0.587	0.268	0.043	0.689	0.613889
N.mossambica_2269_0.324915476505541_PLA2	109	N	E	0.338	0.257	0.016	0.727	0.618333
N.mossambica_2269_0.324915476505541_PLA2	110	Y	E	0.298	0.184	0.043	0.773	0.628556
N.mossambica_2269_0.324915476505541_PLA2	111	N	E	0.506	0.113	0.043	0.844	0.641778
N.mossambica_2269_0.324915476505541_PLA2	112	I	B	0.228	0.053	0.043	0.903	0.631222
N.mossambica_2269_0.324915476505541_PLA2	113	D	E	0.54	0.018	0.019	0.964	0.618111
N.mossambica_2269_0.324915476505541_PLA2	114	L	E	0.513	0.018	0.019	0.964	0.592444
N.mossambica_2269_0.324915476505541_PLA2	115	K	E	0.494	0.018	0.019	0.964	0.581
N.mossambica_2269_0.324915476505541_PLA2	116	A	E	0.511	0.018	0.019	0.964	0.509111
N.mossambica_2269_0.324915476505541_PLA2	117	R	E	0.474	0.018	0.047	0.935	0.443
N.mossambica_2269_0.324915476505541_PLA2	118	C	B	0.094	0.018	0.019	0.964	0.377556
N.mossambica_2269_0.324915476505541_PLA2	119	Q	E	0.743	0.003	0.003	0.994	0.309222
N.mossambica_956_2283_1048_0.5086_PLA2	1	N	E	0.692	0.003	0.003	0.994	0.253
N.mossambica_956_2283_1048_0.5086_PLA2	2	L	B	0.243	0.782	0.003	0.216	0.316889
N.mossambica_956_2283_1048_0.5086_PLA2	3	Y	E	0.277	0.858	0.002	0.139	0.369222
N.mossambica_956_2283_1048_0.5086_PLA2	4	Q	E	0.317	0.879	0.01	0.111	0.404667
N.mossambica_956_2283_1048_0.5086_PLA2	5	F	B	0.051	0.938	0.007	0.055	0.440333
N.mossambica_956_2283_1048_0.5086_PLA2	6	K	B	0.229	0.923	0.002	0.076	0.464333
N.mossambica_956_2283_1048_0.5086_PLA2	7	N	E	0.398	0.923	0.002	0.076	0.461333
N.mossambica_956_2283_1048_0.5086_PLA2	8	M	B	0.054	0.97	0.001	0.03	0.448111
N.mossambica_956_2283_1048_0.5086_PLA2	9	I	B	0.031	0.975	0.003	0.022	0.431
N.mossambica_956_2283_1048_0.5086_PLA2	10	H	E	0.329	0.938	0.007	0.055	0.452
N.mossambica_956_2283_1048_0.5086_PLA2	11	C	B	0.188	0.879	0.01	0.111	0.443667
N.mossambica_956_2283_1048_0.5086_PLA2	12	T	B	0.116	0.802	0.014	0.185	0.451778
N.mossambica_956_2283_1048_0.5086_PLA2	13	V	B	0.116	0.43	0.016	0.555	0.470222
N.mossambica_956_2283_1048_0.5086_PLA2	14	P	E	0.447	0.058	0.017	0.925	0.481222
N.mossambica_956_2283_1048_0.5086_PLA2	15	S	E	0.418	0.018	0.019	0.964	0.478889
N.mossambica_956_2283_1048_0.5086_PLA2	16	R	B	0.243	0.018	0.019	0.964	0.483
N.mossambica_956_2283_1048_0.5086_PLA2	17	P	B	0.066	0.115	0.016	0.868	0.483444
N.mossambica_956_2283_1048_0.5086_PLA2	18	W	B	0.095	0.43	0.016	0.555	0.497778
N.mossambica_956_2283_1048_0.5086_PLA2	19	W	B	0.179	0.455	0.046	0.498	0.488778
N.mossambica_956_2283_1048_0.5086_PLA2	20	H	B	0.187	0.502	0.102	0.396	0.485444
N.mossambica_956_2283_1048_0.5086_PLA2	21	F	B	0.058	0.502	0.102	0.396	0.475889
N.mossambica_956_2283_1048_0.5086_PLA2	22	A	B	0.236	0.386	0.097	0.517	0.465111
N.mossambica_956_2283_1048_0.5086_PLA2	23	D	E	0.353	0.278	0.093	0.628	0.470444
N.mossambica_956_2283_1048_0.5086_PLA2	24	Y	B	0.052	0.113	0.087	0.8	0.456444
N.mossambica_956_2283_1048_0.5086_PLA2	25	G	B	0.044	0.056	0.142	0.802	0.446
N.mossambica_956_2283_1048_0.5086_PLA2	26	C	B	0.025	0.022	0.359	0.619	0.457889
N.mossambica_956_2283_1048_0.5086_PLA2	27	Y	B	0.072	0.021	0.451	0.528	0.465444
N.mossambica_956_2283_1048_0.5086_PLA2	28	C	B	0.019	0.022	0.359	0.619	0.470778
N.mossambica_956_2283_1048_0.5086_PLA2	29	G	B	0.084	0.021	0.279	0.699	0.499889
N.mossambica_956_2283_1048_0.5086_PLA2	30	R	B	0.263	0.019	0.141	0.84	0.524778
N.mossambica_956_2283_1048_0.5086_PLA2	31	G	E	0.329	0.005	0.045	0.951	0.555
N.mossambica_956_2283_1048_0.5086_PLA2	32	G	B	0.295	0.005	0.045	0.951	0.568111
N.mossambica_956_2283_1048_0.5086_PLA2	33	K	E	0.533	0.018	0.047	0.935	0.585
N.mossambica_956_2283_1048_0.5086_PLA2	34	G	E	0.429	0.018	0.047	0.935	0.614444
N.mossambica_956_2283_1048_0.5086_PLA2	35	T	E	0.415	0.005	0.045	0.951	0.629889
N.mossambica_956_2283_1048_0.5086_PLA2	36	P	E	0.291	0.018	0.047	0.935	0.627111
N.mossambica_956_2283_1048_0.5086_PLA2	37	V	E	0.455	0.018	0.047	0.935	0.631889
N.mossambica_956_2283_1048_0.5086_PLA2	38	D	E	0.43	0.018	0.047	0.935	0.618222
N.mossambica_956_2283_1048_0.5086_PLA2	39	D	E	0.561	0.053	0.043	0.903	0.595
N.mossambica_956_2283_1048_0.5086_PLA2	40	L	E	0.36	0.053	0.043	0.903	0.575667
N.mossambica_956_2283_1048_0.5086_PLA2	41	D	E	0.372	0.053	0.043	0.903	0.572111
N.mossambica_956_2283_1048_0.5086_PLA2	42	R	E	0.348	0.113	0.087	0.8	0.570889
N.mossambica_956_2283_1048_0.5086_PLA2	43	C	B	0.037	0.199	0.152	0.649	0.557
N.mossambica_956_2283_1048_0.5086_PLA2	44	C	B	0.06	0.216	0.235	0.548	0.539
N.mossambica_956_2283_1048_0.5086_PLA2	45	Q	E	0.377	0.125	0.227	0.648	0.534333
N.mossambica_956_2283_1048_0.5086_PLA2	46	V	E	0.395	0.052	0.084	0.864	0.513778
N.mossambica_956_2283_1048_0.5086_PLA2	47	H	B	0.209	0.053	0.043	0.903	0.500444
N.mossambica_956_2283_1048_0.5086_PLA2	48	D	E	0.493	0.058	0.017	0.925	0.502667
N.mossambica_956_2283_1048_0.5086_PLA2	49	N	B	0.216	0.257	0.016	0.727	0.502
N.mossambica_956_2283_1048_0.5086_PLA2	50	C	B	0.048	0.522	0.016	0.462	0.482889
N.mossambica_956_2283_1048_0.5086_PLA2	51	Y	B	0.118	0.858	0.002	0.139	0.485111
N.mossambica_956_2283_1048_0.5086_PLA2	52	E	E	0.508	0.923	0.002	0.076	0.481556
N.mossambica_956_2283_1048_0.5086_PLA2	53	K	E	0.412	0.858	0.002	0.139	0.487444
N.mossambica_956_2283_1048_0.5086_PLA2	54	A	B	0.038	0.858	0.002	0.139	0.489778
N.mossambica_956_2283_1048_0.5086_PLA2	55	G	E	0.456	0.802	0.014	0.185	0.486556
N.mossambica_956_2283_1048_0.5086_PLA2	56	K	E	0.74	0.622	0.015	0.363	0.494333
N.mossambica_956_2283_1048_0.5086_PLA2	57	M	E	0.382	0.246	0.004	0.75	0.498111
N.mossambica_956_2283_1048_0.5086_PLA2	58	G	E	0.486	0.018	0.019	0.964	0.508111
N.mossambica_956_2283_1048_0.5086_PLA2	59	C	B	0.077	0.018	0.047	0.935	0.521667
N.mossambica_956_2283_1048_0.5086_PLA2	60	W	B	0.284	0.018	0.088	0.893	0.518778
N.mossambica_956_2283_1048_0.5086_PLA2	61	P	B	0.313	0.004	0.197	0.799	0.511889
N.mossambica_956_2283_1048_0.5086_PLA2	62	Y	E	0.38	0.005	0.336	0.66	0.511556
N.mossambica_956_2283_1048_0.5086_PLA2	63	F	B	0.26	0.004	0.514	0.481	0.510556
N.mossambica_956_2283_1048_0.5086_PLA2	64	T	E	0.328	0.004	0.514	0.481	0.526444
N.mossambica_956_2283_1048_0.5086_PLA2	65	L	E	0.354	0.004	0.514	0.481	0.506444
N.mossambica_956_2283_1048_0.5086_PLA2	66	Y	B	0.114	0.004	0.616	0.381	0.492889
N.mossambica_956_2283_1048_0.5086_PLA2	67	K	E	0.449	0.003	0.718	0.279	0.485333
N.mossambica_956_2283_1048_0.5086_PLA2	68	Y	B	0.11	0.018	0.846	0.136	0.482667
N.mossambica_956_2283_1048_0.5086_PLA2	69	K	E	0.416	0.011	0.918	0.071	0.483778
N.mossambica_956_2283_1048_0.5086_PLA2	70	C	B	0.174	0.001	0.959	0.04	0.492667
N.mossambica_956_2283_1048_0.5086_PLA2	71	S	E	0.501	0.002	0.816	0.182	0.475556
N.mossambica_956_2283_1048_0.5086_PLA2	72	Q	E	0.667	0.005	0.045	0.951	0.470667
N.mossambica_956_2283_1048_0.5086_PLA2	73	G	E	0.635	0.005	0.015	0.979	0.443889
N.mossambica_956_2283_1048_0.5086_PLA2	74	K	E	0.635	0.004	0.514	0.481	0.459556
N.mossambica_956_2283_1048_0.5086_PLA2	75	L	B	0.071	0.002	0.816	0.182	0.476667
N.mossambica_956_2283_1048_0.5086_PLA2	76	P	E	0.395	0.001	0.9	0.099	0.486556
N.mossambica_956_2283_1048_0.5086_PLA2	77	C	B	0.046	0.002	0.816	0.182	0.495
N.mossambica_956_2283_1048_0.5086_PLA2	78	S	E	0.427	0.005	0.336	0.66	0.498556
N.mossambica_956_2283_1048_0.5086_PLA2	79	G	E	0.658	0.005	0.045	0.951	0.497
N.mossambica_956_2283_1048_0.5086_PLA2	80	G	E	0.632	0.003	0.003	0.994	0.498778
N.mossambica_956_2283_1048_0.5086_PLA2	81	N	E	0.622	0.053	0.005	0.942	0.502444
N.mossambica_956_2283_1048_0.5086_PLA2	82	N	E	0.493	0.176	0.004	0.82	0.519778
N.mossambica_956_2283_1048_0.5086_PLA2	83	K	E	0.436	0.782	0.003	0.216	0.507444
N.mossambica_956_2283_1048_0.5086_PLA2	84	C	B	0.038	0.782	0.003	0.216	0.488889
N.mossambica_956_2283_1048_0.5086_PLA2	85	Q	B	0.247	0.858	0.002	0.139	0.465
N.mossambica_956_2283_1048_0.5086_PLA2	86	A	E	0.492	0.879	0.01	0.111	0.457556
N.mossambica_956_2283_1048_0.5086_PLA2	87	A	B	0.257	0.938	0.007	0.055	0.420222
N.mossambica_956_2283_1048_0.5086_PLA2	88	V	B	0.129	0.879	0.01	0.111	0.413556
N.mossambica_956_2283_1048_0.5086_PLA2	89	C	B	0.071	0.802	0.014	0.185	0.415778
N.mossambica_956_2283_1048_0.5086_PLA2	90	N	E	0.478	0.782	0.003	0.216	0.413
N.mossambica_956_2283_1048_0.5086_PLA2	91	C	B	0.038	0.694	0.003	0.303	0.397556
N.mossambica_956_2283_1048_0.5086_PLA2	92	D	B	0.183	0.782	0.003	0.216	0.384667
N.mossambica_956_2283_1048_0.5086_PLA2	93	L	E	0.365	0.97	0.001	0.03	0.391444
N.mossambica_956_2283_1048_0.5086_PLA2	94	V	B	0.218	0.97	0.001	0.03	0.383111
N.mossambica_956_2283_1048_0.5086_PLA2	95	A	B	0.028	0.97	0.001	0.03	0.373111
N.mossambica_956_2283_1048_0.5086_PLA2	96	A	B	0.054	0.97	0.001	0.03	0.395111
N.mossambica_956_2283_1048_0.5086_PLA2	97	N	E	0.308	0.97	0.001	0.03	0.408667
N.mossambica_956_2283_1048_0.5086_PLA2	98	C	B	0.02	0.923	0.002	0.076	0.414889
N.mossambica_956_2283_1048_0.5086_PLA2	99	F	B	0.073	0.782	0.003	0.216	0.422778
N.mossambica_956_2283_1048_0.5086_PLA2	100	A	E	0.348	0.6	0.003	0.397	0.445556
N.mossambica_956_2283_1048_0.5086_PLA2	101	G	E	0.591	0.321	0.003	0.675	0.469667
N.mossambica_956_2283_1048_0.5086_PLA2	102	A	B	0.134	0.053	0.005	0.942	0.490889
N.mossambica_956_2283_1048_0.5086_PLA2	103	P	E	0.509	0.018	0.019	0.964	0.523
N.mossambica_956_2283_1048_0.5086_PLA2	104	Y	B	0.25	0.018	0.019	0.964	0.536556
N.mossambica_956_2283_1048_0.5086_PLA2	105	I	E	0.275	0.053	0.043	0.903	0.552111
N.mossambica_956_2283_1048_0.5086_PLA2	106	D	E	0.497	0.184	0.043	0.773	0.560556
N.mossambica_956_2283_1048_0.5086_PLA2	107	A	E	0.592	0.268	0.043	0.689	0.564444
N.mossambica_956_2283_1048_0.5086_PLA2	108	N	E	0.293	0.268	0.043	0.689	0.571111
N.mossambica_956_2283_1048_0.5086_PLA2	109	Y	B	0.179	0.184	0.043	0.773	0.589889
N.mossambica_956_2283_1048_0.5086_PLA2	110	N	E	0.484	0.191	0.086	0.723	0.608222
N.mossambica_956_2283_1048_0.5086_PLA2	111	V	B	0.16	0.113	0.043	0.844	0.607111
N.mossambica_956_2283_1048_0.5086_PLA2	112	N	E	0.391	0.018	0.019	0.964	0.606
N.mossambica_956_2283_1048_0.5086_PLA2	113	L	E	0.536	0.018	0.019	0.964	0.595
N.mossambica_956_2283_1048_0.5086_PLA2	114	K	E	0.573	0.018	0.019	0.964	0.596778
N.mossambica_956_2283_1048_0.5086_PLA2	115	E	E	0.564	0.018	0.019	0.964	0.525444
N.mossambica_956_2283_1048_0.5086_PLA2	116	R	E	0.422	0.016	0.005	0.979	0.466889
N.mossambica_956_2283_1048_0.5086_PLA2	117	C	B	0.07	0.016	0.005	0.979	0.398333
N.mossambica_956_2283_1048_0.5086_PLA2	118	Q	E	0.706	0.003	0.003	0.994	0.322778
N.mossambica_976_0.0051078127118414_PLA2	1	N	E	0.705	0.003	0.003	0.994	0.252556
N.mossambica_976_0.0051078127118414_PLA2	2	L	E	0.27	0.782	0.003	0.216	0.319556
N.mossambica_976_0.0051078127118414_PLA2	3	Y	E	0.287	0.858	0.002	0.139	0.371778
N.mossambica_976_0.0051078127118414_PLA2	4	Q	E	0.344	0.879	0.01	0.111	0.407889
N.mossambica_976_0.0051078127118414_PLA2	5	F	B	0.061	0.938	0.007	0.055	0.441556
N.mossambica_976_0.0051078127118414_PLA2	6	K	B	0.232	0.938	0.007	0.055	0.468222
N.mossambica_976_0.0051078127118414_PLA2	7	N	E	0.417	0.923	0.002	0.076	0.463444
N.mossambica_976_0.0051078127118414_PLA2	8	M	B	0.063	0.97	0.001	0.03	0.455
N.mossambica_976_0.0051078127118414_PLA2	9	I	B	0.039	0.975	0.003	0.022	0.438111
N.mossambica_976_0.0051078127118414_PLA2	10	H	E	0.362	0.938	0.007	0.055	0.460556
N.mossambica_976_0.0051078127118414_PLA2	11	C	B	0.204	0.879	0.01	0.111	0.452111
N.mossambica_976_0.0051078127118414_PLA2	12	T	B	0.143	0.802	0.014	0.185	0.464667
N.mossambica_976_0.0051078127118414_PLA2	13	V	B	0.119	0.339	0.016	0.645	0.483889
N.mossambica_976_0.0051078127118414_PLA2	14	P	E	0.448	0.058	0.017	0.925	0.500333
N.mossambica_976_0.0051078127118414_PLA2	15	S	E	0.418	0.018	0.019	0.964	0.500222
N.mossambica_976_0.0051078127118414_PLA2	16	R	B	0.284	0.018	0.019	0.964	0.509667
N.mossambica_976_0.0051078127118414_PLA2	17	P	B	0.086	0.115	0.016	0.868	0.510667
N.mossambica_976_0.0051078127118414_PLA2	18	W	B	0.123	0.339	0.016	0.645	0.529778
N.mossambica_976_0.0051078127118414_PLA2	19	W	B	0.224	0.354	0.048	0.598	0.522889
N.mossambica_976_0.0051078127118414_PLA2	20	H	B	0.235	0.386	0.097	0.517	0.517111
N.mossambica_976_0.0051078127118414_PLA2	21	F	B	0.073	0.386	0.097	0.517	0.504
N.mossambica_976_0.0051078127118414_PLA2	22	A	E	0.283	0.278	0.093	0.628	0.490444
N.mossambica_976_0.0051078127118414_PLA2	23	D	E	0.371	0.191	0.086	0.723	0.492333
N.mossambica_976_0.0051078127118414_PLA2	24	Y	B	0.054	0.052	0.084	0.864	0.472444
N.mossambica_976_0.0051078127118414_PLA2	25	G	B	0.048	0.019	0.141	0.84	0.461333
N.mossambica_976_0.0051078127118414_PLA2	26	C	B	0.029	0.022	0.359	0.619	0.470333
N.mossambica_976_0.0051078127118414_PLA2	27	Y	B	0.088	0.021	0.451	0.528	0.473444
N.mossambica_976_0.0051078127118414_PLA2	28	C	B	0.021	0.022	0.359	0.619	0.472111
N.mossambica_976_0.0051078127118414_PLA2	29	G	B	0.104	0.02	0.205	0.775	0.498556
N.mossambica_976_0.0051078127118414_PLA2	30	R	E	0.295	0.018	0.088	0.893	0.524111
N.mossambica_976_0.0051078127118414_PLA2	31	G	E	0.385	0.005	0.045	0.951	0.557667
N.mossambica_976_0.0051078127118414_PLA2	32	G	B	0.266	0.005	0.045	0.951	0.571889
N.mossambica_976_0.0051078127118414_PLA2	33	K	E	0.569	0.018	0.047	0.935	0.590667
N.mossambica_976_0.0051078127118414_PLA2	34	G	E	0.457	0.018	0.047	0.935	0.62
N.mossambica_976_0.0051078127118414_PLA2	35	T	E	0.402	0.018	0.047	0.935	0.629667
N.mossambica_976_0.0051078127118414_PLA2	36	A	E	0.308	0.018	0.047	0.935	0.619
N.mossambica_976_0.0051078127118414_PLA2	37	V	E	0.402	0.053	0.043	0.903	0.620778
N.mossambica_976_0.0051078127118414_PLA2	38	D	E	0.448	0.053	0.043	0.903	0.599
N.mossambica_976_0.0051078127118414_PLA2	39	D	E	0.477	0.113	0.043	0.844	0.567
N.mossambica_976_0.0051078127118414_PLA2	40	L	B	0.272	0.184	0.043	0.773	0.536667
N.mossambica_976_0.0051078127118414_PLA2	41	D	E	0.322	0.184	0.043	0.773	0.525
N.mossambica_976_0.0051078127118414_PLA2	42	R	E	0.358	0.354	0.048	0.598	0.523111
N.mossambica_976_0.0051078127118414_PLA2	43	C	B	0.038	0.502	0.102	0.396	0.504778
N.mossambica_976_0.0051078127118414_PLA2	44	C	B	0.041	0.538	0.173	0.289	0.488889
N.mossambica_976_0.0051078127118414_PLA2	45	Q	E	0.343	0.428	0.171	0.402	0.491556
N.mossambica_976_0.0051078127118414_PLA2	46	V	E	0.418	0.191	0.086	0.723	0.473111
N.mossambica_976_0.0051078127118414_PLA2	47	H	B	0.156	0.053	0.043	0.903	0.471444
N.mossambica_976_0.0051078127118414_PLA2	48	D	E	0.621	0.058	0.017	0.925	0.475444
N.mossambica_976_0.0051078127118414_PLA2	49	N	B	0.248	0.181	0.016	0.803	0.476667
N.mossambica_976_0.0051078127118414_PLA2	50	C	B	0.046	0.522	0.016	0.462	0.463667
N.mossambica_976_0.0051078127118414_PLA2	51	Y	B	0.147	0.858	0.002	0.139	0.475222
N.mossambica_976_0.0051078127118414_PLA2	52	G	E	0.602	0.858	0.002	0.139	0.475667
N.mossambica_976_0.0051078127118414_PLA2	53	E	E	0.443	0.858	0.002	0.139	0.487
N.mossambica_976_0.0051078127118414_PLA2	54	A	B	0.045	0.782	0.003	0.216	0.492667
N.mossambica_976_0.0051078127118414_PLA2	55	E	E	0.55	0.694	0.003	0.303	0.494
N.mossambica_976_0.0051078127118414_PLA2	56	K	E	0.727	0.406	0.004	0.59	0.501
N.mossambica_976_0.0051078127118414_PLA2	57	L	E	0.448	0.109	0.005	0.886	0.514444
N.mossambica_976_0.0051078127118414_PLA2	58	G	E	0.53	0.018	0.019	0.964	0.533444
N.mossambica_976_0.0051078127118414_PLA2	59	C	B	0.127	0.018	0.047	0.935	0.550222
N.mossambica_976_0.0051078127118414_PLA2	60	W	B	0.288	0.004	0.138	0.858	0.540444
N.mossambica_976_0.0051078127118414_PLA2	61	P	E	0.364	0.005	0.262	0.733	0.536111
N.mossambica_976_0.0051078127118414_PLA2	62	Y	E	0.4	0.005	0.336	0.66	0.522444
N.mossambica_976_0.0051078127118414_PLA2	63	L	B	0.226	0.004	0.42	0.576	0.515333
N.mossambica_976_0.0051078127118414_PLA2	64	T	E	0.442	0.004	0.42	0.576	0.520333
N.mossambica_976_0.0051078127118414_PLA2	65	L	E	0.43	0.004	0.514	0.481	0.497444
N.mossambica_976_0.0051078127118414_PLA2	66	Y	B	0.096	0.003	0.718	0.279	0.476444
N.mossambica_976_0.0051078127118414_PLA2	67	K	E	0.426	0.002	0.816	0.182	0.466444
N.mossambica_976_0.0051078127118414_PLA2	68	Y	B	0.091	0.001	0.9	0.099	0.458444
N.mossambica_976_0.0051078127118414_PLA2	69	E	E	0.444	0.011	0.918	0.071	0.456111
N.mossambica_976_0.0051078127118414_PLA2	70	C	B	0.141	0.001	0.9	0.099	0.456444
N.mossambica_976_0.0051078127118414_PLA2	71	S	E	0.598	0.002	0.816	0.182	0.446889
N.mossambica_976_0.0051078127118414_PLA2	72	Q	E	0.726	0.005	0.045	0.951	0.445111
N.mossambica_976_0.0051078127118414_PLA2	73	G	E	0.466	0.005	0.015	0.979	0.424222
N.mossambica_976_0.0051078127118414_PLA2	74	K	E	0.534	0.004	0.616	0.381	0.438889
N.mossambica_976_0.0051078127118414_PLA2	75	L	B	0.05	0.001	0.9	0.099	0.457111
N.mossambica_976_0.0051078127118414_PLA2	76	T	E	0.385	0.001	0.9	0.099	0.466778
N.mossambica_976_0.0051078127118414_PLA2	77	C	B	0.032	0.002	0.816	0.182	0.476889
N.mossambica_976_0.0051078127118414_PLA2	78	S	E	0.471	0.005	0.262	0.733	0.481111
N.mossambica_976_0.0051078127118414_PLA2	79	G	E	0.611	0.005	0.045	0.951	0.484889
N.mossambica_976_0.0051078127118414_PLA2	80	G	E	0.676	0.003	0.003	0.994	0.490333
N.mossambica_976_0.0051078127118414_PLA2	81	N	E	0.649	0.053	0.005	0.942	0.492111
N.mossambica_976_0.0051078127118414_PLA2	82	N	E	0.578	0.246	0.004	0.75	0.513444
N.mossambica_976_0.0051078127118414_PLA2	83	K	E	0.453	0.782	0.003	0.216	0.502333
N.mossambica_976_0.0051078127118414_PLA2	84	C	B	0.035	0.782	0.003	0.216	0.482333
N.mossambica_976_0.0051078127118414_PLA2	85	A	B	0.237	0.858	0.002	0.139	0.461444
N.mossambica_976_0.0051078127118414_PLA2	86	A	E	0.509	0.938	0.007	0.055	0.457556
N.mossambica_976_0.0051078127118414_PLA2	87	A	B	0.28	0.923	0.002	0.076	0.421667
N.mossambica_976_0.0051078127118414_PLA2	88	V	B	0.089	0.923	0.002	0.076	0.410222
N.mossambica_976_0.0051078127118414_PLA2	89	C	B	0.071	0.923	0.002	0.076	0.414
N.mossambica_976_0.0051078127118414_PLA2	90	N	E	0.502	0.923	0.002	0.076	0.413556
N.mossambica_976_0.0051078127118414_PLA2	91	C	B	0.043	0.858	0.002	0.139	0.397333
N.mossambica_976_0.0051078127118414_PLA2	92	D	B	0.126	0.923	0.002	0.076	0.388667
N.mossambica_976_0.0051078127118414_PLA2	93	L	E	0.358	0.97	0.001	0.03	0.395444
N.mossambica_976_0.0051078127118414_PLA2	94	V	B	0.296	0.988	0	0.012	0.383222
N.mossambica_976_0.0051078127118414_PLA2	95	A	B	0.028	0.988	0	0.012	0.366556
N.mossambica_976_0.0051078127118414_PLA2	96	A	B	0.047	0.97	0.001	0.03	0.385556
N.mossambica_976_0.0051078127118414_PLA2	97	N	E	0.325	0.97	0.001	0.03	0.396778
N.mossambica_976_0.0051078127118414_PLA2	98	C	B	0.03	0.923	0.002	0.076	0.398889
N.mossambica_976_0.0051078127118414_PLA2	99	F	B	0.054	0.858	0.002	0.139	0.408556
N.mossambica_976_0.0051078127118414_PLA2	100	A	E	0.371	0.694	0.003	0.303	0.429444
N.mossambica_976_0.0051078127118414_PLA2	101	G	E	0.583	0.502	0.002	0.495	0.446333
N.mossambica_976_0.0051078127118414_PLA2	102	A	B	0.132	0.109	0.005	0.886	0.471444
N.mossambica_976_0.0051078127118414_PLA2	103	R	E	0.552	0.058	0.017	0.925	0.507556
N.mossambica_976_0.0051078127118414_PLA2	104	Y	B	0.216	0.018	0.047	0.935	0.528778
N.mossambica_976_0.0051078127118414_PLA2	105	I	B	0.232	0.053	0.043	0.903	0.546333
N.mossambica_976_0.0051078127118414_PLA2	106	D	E	0.49	0.257	0.016	0.727	0.559556
N.mossambica_976_0.0051078127118414_PLA2	107	A	E	0.638	0.339	0.016	0.645	0.562111
N.mossambica_976_0.0051078127118414_PLA2	108	N	E	0.348	0.339	0.016	0.645	0.563444
N.mossambica_976_0.0051078127118414_PLA2	109	Y	B	0.188	0.257	0.016	0.727	0.577667
N.mossambica_976_0.0051078127118414_PLA2	110	N	E	0.488	0.181	0.016	0.803	0.598778
N.mossambica_976_0.0051078127118414_PLA2	111	I	B	0.214	0.115	0.016	0.868	0.595667
N.mossambica_976_0.0051078127118414_PLA2	112	N	E	0.355	0.018	0.019	0.964	0.590444
N.mossambica_976_0.0051078127118414_PLA2	113	L	E	0.527	0.016	0.005	0.979	0.576667
N.mossambica_976_0.0051078127118414_PLA2	114	K	E	0.528	0.053	0.005	0.942	0.579333
N.mossambica_976_0.0051078127118414_PLA2	115	E	E	0.585	0.016	0.005	0.979	0.508889
N.mossambica_976_0.0051078127118414_PLA2	116	R	E	0.443	0.053	0.005	0.942	0.452222
N.mossambica_976_0.0051078127118414_PLA2	117	C	B	0.077	0.016	0.005	0.979	0.386778
N.mossambica_976_0.0051078127118414_PLA2	118	Q	E	0.72	0.003	0.003	0.994	0.317667
N.naja_1810_1899_0.2332_PLA2	1	N	E	0.66	0.003	0.003	0.994	0.255111
N.naja_1810_1899_0.2332_PLA2	2	L	B	0.249	0.802	0.014	0.185	0.320333
N.naja_1810_1899_0.2332_PLA2	3	Y	E	0.294	0.879	0.01	0.111	0.372
N.naja_1810_1899_0.2332_PLA2	4	Q	E	0.33	0.879	0.01	0.111	0.408
N.naja_1810_1899_0.2332_PLA2	5	F	B	0.061	0.938	0.007	0.055	0.445778
N.naja_1810_1899_0.2332_PLA2	6	K	B	0.259	0.938	0.007	0.055	0.469889
N.naja_1810_1899_0.2332_PLA2	7	N	E	0.411	0.938	0.007	0.055	0.469778
N.naja_1810_1899_0.2332_PLA2	8	M	B	0.072	0.938	0.007	0.055	0.460778
N.naja_1810_1899_0.2332_PLA2	9	I	B	0.036	0.938	0.007	0.055	0.443111
N.naja_1810_1899_0.2332_PLA2	10	K	E	0.339	0.938	0.007	0.055	0.464889
N.naja_1810_1899_0.2332_PLA2	11	C	B	0.194	0.879	0.01	0.111	0.459556
N.naja_1810_1899_0.2332_PLA2	12	T	B	0.142	0.717	0.014	0.269	0.473
N.naja_1810_1899_0.2332_PLA2	13	V	B	0.118	0.339	0.016	0.645	0.497111
N.naja_1810_1899_0.2332_PLA2	14	P	E	0.439	0.058	0.017	0.925	0.507222
N.naja_1810_1899_0.2332_PLA2	15	S	E	0.436	0.018	0.019	0.964	0.506778
N.naja_1810_1899_0.2332_PLA2	16	R	B	0.311	0.018	0.019	0.964	0.51
N.naja_1810_1899_0.2332_PLA2	17	S	B	0.096	0.053	0.005	0.942	0.510556
N.naja_1810_1899_0.2332_PLA2	18	W	B	0.082	0.339	0.016	0.645	0.528556
N.naja_1810_1899_0.2332_PLA2	19	W	B	0.225	0.354	0.048	0.598	0.517444
N.naja_1810_1899_0.2332_PLA2	20	D	B	0.227	0.386	0.097	0.517	0.510667
N.naja_1810_1899_0.2332_PLA2	21	F	B	0.061	0.502	0.102	0.396	0.496444
N.naja_1810_1899_0.2332_PLA2	22	A	E	0.284	0.386	0.097	0.517	0.478778
N.naja_1810_1899_0.2332_PLA2	23	D	E	0.375	0.191	0.086	0.723	0.484111
N.naja_1810_1899_0.2332_PLA2	24	Y	B	0.051	0.113	0.087	0.8	0.467889
N.naja_1810_1899_0.2332_PLA2	25	G	B	0.044	0.056	0.142	0.802	0.455889
N.naja_1810_1899_0.2332_PLA2	26	C	B	0.025	0.022	0.359	0.619	0.463778
N.naja_1810_1899_0.2332_PLA2	27	Y	B	0.076	0.021	0.451	0.528	0.462889
N.naja_1810_1899_0.2332_PLA2	28	C	B	0.02	0.021	0.451	0.528	0.463778
N.naja_1810_1899_0.2332_PLA2	29	G	B	0.071	0.021	0.279	0.699	0.486556
N.naja_1810_1899_0.2332_PLA2	30	R	E	0.313	0.018	0.088	0.893	0.510222
N.naja_1810_1899_0.2332_PLA2	31	G	B	0.256	0.005	0.045	0.951	0.541556
N.naja_1810_1899_0.2332_PLA2	32	G	B	0.246	0.018	0.047	0.935	0.555222
N.naja_1810_1899_0.2332_PLA2	33	S	E	0.55	0.018	0.047	0.935	0.57
N.naja_1810_1899_0.2332_PLA2	34	G	E	0.387	0.018	0.047	0.935	0.600778
N.naja_1810_1899_0.2332_PLA2	35	T	E	0.414	0.005	0.045	0.951	0.613
N.naja_1810_1899_0.2332_PLA2	36	P	E	0.305	0.018	0.047	0.935	0.614333
N.naja_1810_1899_0.2332_PLA2	37	V	E	0.435	0.052	0.084	0.864	0.620778
N.naja_1810_1899_0.2332_PLA2	38	D	E	0.499	0.053	0.043	0.903	0.609556
N.naja_1810_1899_0.2332_PLA2	39	D	E	0.547	0.052	0.084	0.864	0.585667
N.naja_1810_1899_0.2332_PLA2	40	L	E	0.327	0.113	0.087	0.8	0.566778
N.naja_1810_1899_0.2332_PLA2	41	D	E	0.315	0.113	0.087	0.8	0.560333
N.naja_1810_1899_0.2332_PLA2	42	R	E	0.329	0.191	0.086	0.723	0.560444
N.naja_1810_1899_0.2332_PLA2	43	C	B	0.038	0.278	0.093	0.628	0.543556
N.naja_1810_1899_0.2332_PLA2	44	C	B	0.058	0.307	0.165	0.527	0.527667
N.naja_1810_1899_0.2332_PLA2	45	Q	E	0.385	0.199	0.152	0.649	0.525444
N.naja_1810_1899_0.2332_PLA2	46	V	E	0.397	0.052	0.084	0.864	0.505778
N.naja_1810_1899_0.2332_PLA2	47	H	B	0.186	0.058	0.017	0.925	0.494222
N.naja_1810_1899_0.2332_PLA2	48	D	E	0.523	0.058	0.017	0.925	0.500444
N.naja_1810_1899_0.2332_PLA2	49	N	B	0.228	0.339	0.016	0.645	0.497444
N.naja_1810_1899_0.2332_PLA2	50	C	B	0.038	0.622	0.015	0.363	0.481333
N.naja_1810_1899_0.2332_PLA2	51	Y	B	0.105	0.858	0.002	0.139	0.486
N.naja_1810_1899_0.2332_PLA2	52	D	E	0.556	0.858	0.002	0.139	0.479
N.naja_1810_1899_0.2332_PLA2	53	E	E	0.379	0.858	0.002	0.139	0.48
N.naja_1810_1899_0.2332_PLA2	54	A	B	0.041	0.858	0.002	0.139	0.480667
N.naja_1810_1899_0.2332_PLA2	55	G	E	0.499	0.782	0.003	0.216	0.498111
N.naja_1810_1899_0.2332_PLA2	56	K	E	0.762	0.694	0.003	0.303	0.496111
N.naja_1810_1899_0.2332_PLA2	57	I	B	0.251	0.246	0.004	0.75	0.505667
N.naja_1810_1899_0.2332_PLA2	58	S	E	0.598	0.016	0.005	0.979	0.512333
N.naja_1810_1899_0.2332_PLA2	59	G	E	0.519	0.005	0.015	0.979	0.528667
N.naja_1810_1899_0.2332_PLA2	60	C	B	0.057	0.018	0.047	0.935	0.524444
N.naja_1810_1899_0.2332_PLA2	61	W	B	0.295	0.018	0.088	0.893	0.540444
N.naja_1810_1899_0.2332_PLA2	62	P	B	0.33	0.005	0.262	0.733	0.536444
N.naja_1810_1899_0.2332_PLA2	63	Y	E	0.326	0.005	0.336	0.66	0.529889
N.naja_1810_1899_0.2332_PLA2	64	F	B	0.195	0.004	0.514	0.481	0.521
N.naja_1810_1899_0.2332_PLA2	65	K	E	0.392	0.004	0.42	0.576	0.512889
N.naja_1810_1899_0.2332_PLA2	66	T	E	0.396	0.004	0.514	0.481	0.488
N.naja_1810_1899_0.2332_PLA2	67	Y	B	0.095	0.004	0.616	0.381	0.471
N.naja_1810_1899_0.2332_PLA2	68	S	E	0.436	0.002	0.816	0.182	0.461333
N.naja_1810_1899_0.2332_PLA2	69	Y	B	0.095	0.001	0.9	0.099	0.455222
N.naja_1810_1899_0.2332_PLA2	70	E	E	0.414	0.011	0.918	0.071	0.443667
N.naja_1810_1899_0.2332_PLA2	71	C	B	0.138	0.001	0.9	0.099	0.442222
N.naja_1810_1899_0.2332_PLA2	72	S	E	0.567	0.003	0.718	0.279	0.434333
N.naja_1810_1899_0.2332_PLA2	73	Q	E	0.731	0.005	0.045	0.951	0.427667
N.naja_1810_1899_0.2332_PLA2	74	G	E	0.485	0.005	0.015	0.979	0.417
N.naja_1810_1899_0.2332_PLA2	75	T	E	0.526	0.004	0.514	0.481	0.434
N.naja_1810_1899_0.2332_PLA2	76	L	B	0.065	0.002	0.816	0.182	0.455333
N.naja_1810_1899_0.2332_PLA2	77	T	E	0.35	0.001	0.9	0.099	0.464667
N.naja_1810_1899_0.2332_PLA2	78	C	B	0.035	0.002	0.816	0.182	0.470222
N.naja_1810_1899_0.2332_PLA2	79	K	E	0.467	0.005	0.262	0.733	0.476667
N.naja_1810_1899_0.2332_PLA2	80	G	E	0.541	0.005	0.045	0.951	0.489222
N.naja_1810_1899_0.2332_PLA2	81	D	E	0.718	0.005	0.015	0.979	0.491111
N.naja_1810_1899_0.2332_PLA2	82	N	E	0.641	0.053	0.005	0.942	0.493778
N.naja_1810_1899_0.2332_PLA2	83	N	E	0.515	0.176	0.004	0.82	0.509333
N.naja_1810_1899_0.2332_PLA2	84	A	E	0.447	0.782	0.003	0.216	0.496111
N.naja_1810_1899_0.2332_PLA2	85	C	B	0.043	0.782	0.003	0.216	0.480889
N.naja_1810_1899_0.2332_PLA2	86	A	B	0.266	0.879	0.01	0.111	0.468333
N.naja_1810_1899_0.2332_PLA2	87	A	E	0.515	0.879	0.01	0.111	0.463889
N.naja_1810_1899_0.2332_PLA2	88	S	E	0.304	0.879	0.01	0.111	0.435444
N.naja_1810_1899_0.2332_PLA2	89	V	B	0.127	0.879	0.01	0.111	0.420778
N.naja_1810_1899_0.2332_PLA2	90	C	B	0.064	0.802	0.014	0.185	0.431
N.naja_1810_1899_0.2332_PLA2	91	D	E	0.505	0.782	0.003	0.216	0.438111
N.naja_1810_1899_0.2332_PLA2	92	C	B	0.05	0.694	0.003	0.303	0.425444
N.naja_1810_1899_0.2332_PLA2	93	D	B	0.153	0.782	0.003	0.216	0.414333
N.naja_1810_1899_0.2332_PLA2	94	R	E	0.362	0.97	0.001	0.03	0.417111
N.naja_1810_1899_0.2332_PLA2	95	L	B	0.293	0.97	0.001	0.03	0.403222
N.naja_1810_1899_0.2332_PLA2	96	A	B	0.03	0.97	0.001	0.03	0.386778
N.naja_1810_1899_0.2332_PLA2	97	A	B	0.037	0.97	0.001	0.03	0.403333
N.naja_1810_1899_0.2332_PLA2	98	I	E	0.292	0.97	0.001	0.03	0.413667
N.naja_1810_1899_0.2332_PLA2	99	C	B	0.024	0.923	0.002	0.076	0.416333
N.naja_1810_1899_0.2332_PLA2	100	F	B	0.053	0.782	0.003	0.216	0.419
N.naja_1810_1899_0.2332_PLA2	101	A	E	0.313	0.6	0.003	0.397	0.438111
N.naja_1810_1899_0.2332_PLA2	102	G	E	0.591	0.321	0.003	0.675	0.46
N.naja_1810_1899_0.2332_PLA2	103	A	B	0.162	0.053	0.005	0.942	0.486111
N.naja_1810_1899_0.2332_PLA2	104	P	E	0.536	0.058	0.017	0.925	0.526667
N.naja_1810_1899_0.2332_PLA2	105	Y	B	0.231	0.053	0.043	0.903	0.559
N.naja_1810_1899_0.2332_PLA2	106	N	B	0.192	0.113	0.043	0.844	0.582778
N.naja_1810_1899_0.2332_PLA2	107	D	E	0.551	0.354	0.048	0.598	0.597
N.naja_1810_1899_0.2332_PLA2	108	N	E	0.619	0.339	0.016	0.645	0.600222
N.naja_1810_1899_0.2332_PLA2	109	N	E	0.297	0.339	0.016	0.645	0.604333
N.naja_1810_1899_0.2332_PLA2	110	Y	E	0.29	0.257	0.016	0.727	0.616889
N.naja_1810_1899_0.2332_PLA2	111	N	E	0.517	0.113	0.043	0.844	0.631556
N.naja_1810_1899_0.2332_PLA2	112	I	B	0.189	0.053	0.043	0.903	0.618444
N.naja_1810_1899_0.2332_PLA2	113	D	E	0.483	0.018	0.019	0.964	0.607444
N.naja_1810_1899_0.2332_PLA2	114	L	E	0.512	0.018	0.019	0.964	0.583444
N.naja_1810_1899_0.2332_PLA2	115	K	E	0.532	0.018	0.019	0.964	0.576222
N.naja_1810_1899_0.2332_PLA2	116	A	E	0.536	0.018	0.019	0.964	0.501778
N.naja_1810_1899_0.2332_PLA2	117	R	E	0.493	0.018	0.019	0.964	0.440222
N.naja_1810_1899_0.2332_PLA2	118	C	B	0.089	0.018	0.019	0.964	0.377
N.naja_1810_1899_0.2332_PLA2	119	Q	E	0.718	0.003	0.003	0.994	0.310111
N.naja_1915_1922_1929_1973_1988_1954_1860_1834_1934_1935_1993_3003_1968_1971_2640_0.8417_PLA2	1	N	E	0.717	0.003	0.003	0.994	0.251556
N.naja_1915_1922_1929_1973_1988_1954_1860_1834_1934_1935_1993_3003_1968_1971_2640_0.8417_PLA2	2	L	E	0.27	0.802	0.014	0.185	0.316444
N.naja_1915_1922_1929_1973_1988_1954_1860_1834_1934_1935_1993_3003_1968_1971_2640_0.8417_PLA2	3	Y	E	0.292	0.879	0.01	0.111	0.368333
N.naja_1915_1922_1929_1973_1988_1954_1860_1834_1934_1935_1993_3003_1968_1971_2640_0.8417_PLA2	4	Q	E	0.338	0.879	0.01	0.111	0.404444
N.naja_1915_1922_1929_1973_1988_1954_1860_1834_1934_1935_1993_3003_1968_1971_2640_0.8417_PLA2	5	F	B	0.067	0.938	0.007	0.055	0.440778
N.naja_1915_1922_1929_1973_1988_1954_1860_1834_1934_1935_1993_3003_1968_1971_2640_0.8417_PLA2	6	K	B	0.258	0.938	0.007	0.055	0.465667
N.naja_1915_1922_1929_1973_1988_1954_1860_1834_1934_1935_1993_3003_1968_1971_2640_0.8417_PLA2	7	N	E	0.403	0.938	0.007	0.055	0.466889
N.naja_1915_1922_1929_1973_1988_1954_1860_1834_1934_1935_1993_3003_1968_1971_2640_0.8417_PLA2	8	M	B	0.073	0.975	0.003	0.022	0.459222
N.naja_1915_1922_1929_1973_1988_1954_1860_1834_1934_1935_1993_3003_1968_1971_2640_0.8417_PLA2	9	I	B	0.034	0.938	0.007	0.055	0.441111
N.naja_1915_1922_1929_1973_1988_1954_1860_1834_1934_1935_1993_3003_1968_1971_2640_0.8417_PLA2	10	K	E	0.319	0.938	0.007	0.055	0.462778
N.naja_1915_1922_1929_1973_1988_1954_1860_1834_1934_1935_1993_3003_1968_1971_2640_0.8417_PLA2	11	C	B	0.192	0.879	0.01	0.111	0.457333
N.naja_1915_1922_1929_1973_1988_1954_1860_1834_1934_1935_1993_3003_1968_1971_2640_0.8417_PLA2	12	T	B	0.15	0.802	0.014	0.185	0.471222
N.naja_1915_1922_1929_1973_1988_1954_1860_1834_1934_1935_1993_3003_1968_1971_2640_0.8417_PLA2	13	V	B	0.115	0.43	0.016	0.555	0.495111
N.naja_1915_1922_1929_1973_1988_1954_1860_1834_1934_1935_1993_3003_1968_1971_2640_0.8417_PLA2	14	P	E	0.452	0.115	0.016	0.868	0.507
N.naja_1915_1922_1929_1973_1988_1954_1860_1834_1934_1935_1993_3003_1968_1971_2640_0.8417_PLA2	15	S	E	0.442	0.018	0.019	0.964	0.507
N.naja_1915_1922_1929_1973_1988_1954_1860_1834_1934_1935_1993_3003_1968_1971_2640_0.8417_PLA2	16	R	B	0.32	0.018	0.019	0.964	0.508889
N.naja_1915_1922_1929_1973_1988_1954_1860_1834_1934_1935_1993_3003_1968_1971_2640_0.8417_PLA2	17	S	B	0.089	0.053	0.005	0.942	0.508111
N.naja_1915_1922_1929_1973_1988_1954_1860_1834_1934_1935_1993_3003_1968_1971_2640_0.8417_PLA2	18	W	B	0.084	0.339	0.016	0.645	0.525444
N.naja_1915_1922_1929_1973_1988_1954_1860_1834_1934_1935_1993_3003_1968_1971_2640_0.8417_PLA2	19	W	B	0.248	0.455	0.046	0.498	0.514778
N.naja_1915_1922_1929_1973_1988_1954_1860_1834_1934_1935_1993_3003_1968_1971_2640_0.8417_PLA2	20	D	B	0.224	0.455	0.046	0.498	0.508556
N.naja_1915_1922_1929_1973_1988_1954_1860_1834_1934_1935_1993_3003_1968_1971_2640_0.8417_PLA2	21	F	B	0.057	0.502	0.102	0.396	0.493222
N.naja_1915_1922_1929_1973_1988_1954_1860_1834_1934_1935_1993_3003_1968_1971_2640_0.8417_PLA2	22	A	E	0.275	0.386	0.097	0.517	0.476
N.naja_1915_1922_1929_1973_1988_1954_1860_1834_1934_1935_1993_3003_1968_1971_2640_0.8417_PLA2	23	D	E	0.369	0.278	0.093	0.628	0.480889
N.naja_1915_1922_1929_1973_1988_1954_1860_1834_1934_1935_1993_3003_1968_1971_2640_0.8417_PLA2	24	Y	B	0.05	0.113	0.087	0.8	0.465
N.naja_1915_1922_1929_1973_1988_1954_1860_1834_1934_1935_1993_3003_1968_1971_2640_0.8417_PLA2	25	G	B	0.043	0.056	0.142	0.802	0.453556
N.naja_1915_1922_1929_1973_1988_1954_1860_1834_1934_1935_1993_3003_1968_1971_2640_0.8417_PLA2	26	C	B	0.025	0.022	0.359	0.619	0.462111
N.naja_1915_1922_1929_1973_1988_1954_1860_1834_1934_1935_1993_3003_1968_1971_2640_0.8417_PLA2	27	Y	B	0.077	0.021	0.451	0.528	0.462333
N.naja_1915_1922_1929_1973_1988_1954_1860_1834_1934_1935_1993_3003_1968_1971_2640_0.8417_PLA2	28	C	B	0.02	0.021	0.451	0.528	0.462444
N.naja_1915_1922_1929_1973_1988_1954_1860_1834_1934_1935_1993_3003_1968_1971_2640_0.8417_PLA2	29	G	B	0.069	0.021	0.279	0.699	0.484222
N.naja_1915_1922_1929_1973_1988_1954_1860_1834_1934_1935_1993_3003_1968_1971_2640_0.8417_PLA2	30	R	E	0.309	0.018	0.088	0.893	0.508333
N.naja_1915_1922_1929_1973_1988_1954_1860_1834_1934_1935_1993_3003_1968_1971_2640_0.8417_PLA2	31	G	B	0.254	0.005	0.045	0.951	0.539444
N.naja_1915_1922_1929_1973_1988_1954_1860_1834_1934_1935_1993_3003_1968_1971_2640_0.8417_PLA2	32	G	B	0.246	0.018	0.047	0.935	0.553222
N.naja_1915_1922_1929_1973_1988_1954_1860_1834_1934_1935_1993_3003_1968_1971_2640_0.8417_PLA2	33	S	E	0.549	0.018	0.047	0.935	0.568222
N.naja_1915_1922_1929_1973_1988_1954_1860_1834_1934_1935_1993_3003_1968_1971_2640_0.8417_PLA2	34	G	E	0.39	0.018	0.047	0.935	0.599333
N.naja_1915_1922_1929_1973_1988_1954_1860_1834_1934_1935_1993_3003_1968_1971_2640_0.8417_PLA2	35	T	E	0.427	0.005	0.015	0.979	0.613333
N.naja_1915_1922_1929_1973_1988_1954_1860_1834_1934_1935_1993_3003_1968_1971_2640_0.8417_PLA2	36	P	E	0.305	0.018	0.047	0.935	0.614667
N.naja_1915_1922_1929_1973_1988_1954_1860_1834_1934_1935_1993_3003_1968_1971_2640_0.8417_PLA2	37	V	E	0.434	0.053	0.043	0.903	0.622111
N.naja_1915_1922_1929_1973_1988_1954_1860_1834_1934_1935_1993_3003_1968_1971_2640_0.8417_PLA2	38	D	E	0.504	0.053	0.043	0.903	0.611889
N.naja_1915_1922_1929_1973_1988_1954_1860_1834_1934_1935_1993_3003_1968_1971_2640_0.8417_PLA2	39	D	E	0.538	0.113	0.043	0.844	0.587111
N.naja_1915_1922_1929_1973_1988_1954_1860_1834_1934_1935_1993_3003_1968_1971_2640_0.8417_PLA2	40	L	E	0.313	0.113	0.087	0.8	0.568111
N.naja_1915_1922_1929_1973_1988_1954_1860_1834_1934_1935_1993_3003_1968_1971_2640_0.8417_PLA2	41	D	E	0.318	0.191	0.086	0.723	0.562444
N.naja_1915_1922_1929_1973_1988_1954_1860_1834_1934_1935_1993_3003_1968_1971_2640_0.8417_PLA2	42	R	E	0.338	0.278	0.093	0.628	0.563333
N.naja_1915_1922_1929_1973_1988_1954_1860_1834_1934_1935_1993_3003_1968_1971_2640_0.8417_PLA2	43	C	B	0.039	0.386	0.097	0.517	0.546111
N.naja_1915_1922_1929_1973_1988_1954_1860_1834_1934_1935_1993_3003_1968_1971_2640_0.8417_PLA2	44	C	B	0.065	0.307	0.165	0.527	0.530556
N.naja_1915_1922_1929_1973_1988_1954_1860_1834_1934_1935_1993_3003_1968_1971_2640_0.8417_PLA2	45	Q	E	0.388	0.191	0.086	0.723	0.528333
N.naja_1915_1922_1929_1973_1988_1954_1860_1834_1934_1935_1993_3003_1968_1971_2640_0.8417_PLA2	46	V	E	0.385	0.113	0.043	0.844	0.506333
N.naja_1915_1922_1929_1973_1988_1954_1860_1834_1934_1935_1993_3003_1968_1971_2640_0.8417_PLA2	47	H	B	0.184	0.115	0.016	0.868	0.494
N.naja_1915_1922_1929_1973_1988_1954_1860_1834_1934_1935_1993_3003_1968_1971_2640_0.8417_PLA2	48	D	E	0.529	0.115	0.016	0.868	0.497222
N.naja_1915_1922_1929_1973_1988_1954_1860_1834_1934_1935_1993_3003_1968_1971_2640_0.8417_PLA2	49	N	B	0.226	0.339	0.016	0.645	0.489444
N.naja_1915_1922_1929_1973_1988_1954_1860_1834_1934_1935_1993_3003_1968_1971_2640_0.8417_PLA2	50	C	B	0.036	0.622	0.015	0.363	0.468111
N.naja_1915_1922_1929_1973_1988_1954_1860_1834_1934_1935_1993_3003_1968_1971_2640_0.8417_PLA2	51	Y	B	0.107	0.879	0.01	0.111	0.474
N.naja_1915_1922_1929_1973_1988_1954_1860_1834_1934_1935_1993_3003_1968_1971_2640_0.8417_PLA2	52	N	E	0.523	0.923	0.002	0.076	0.468556
N.naja_1915_1922_1929_1973_1988_1954_1860_1834_1934_1935_1993_3003_1968_1971_2640_0.8417_PLA2	53	E	E	0.356	0.923	0.002	0.076	0.469667
N.naja_1915_1922_1929_1973_1988_1954_1860_1834_1934_1935_1993_3003_1968_1971_2640_0.8417_PLA2	54	A	B	0.04	0.858	0.002	0.139	0.471444
N.naja_1915_1922_1929_1973_1988_1954_1860_1834_1934_1935_1993_3003_1968_1971_2640_0.8417_PLA2	55	E	E	0.492	0.858	0.002	0.139	0.491
N.naja_1915_1922_1929_1973_1988_1954_1860_1834_1934_1935_1993_3003_1968_1971_2640_0.8417_PLA2	56	K	E	0.752	0.717	0.014	0.269	0.490444
N.naja_1915_1922_1929_1973_1988_1954_1860_1834_1934_1935_1993_3003_1968_1971_2640_0.8417_PLA2	57	I	E	0.26	0.246	0.004	0.75	0.502
N.naja_1915_1922_1929_1973_1988_1954_1860_1834_1934_1935_1993_3003_1968_1971_2640_0.8417_PLA2	58	S	E	0.629	0.016	0.005	0.979	0.512889
N.naja_1915_1922_1929_1973_1988_1954_1860_1834_1934_1935_1993_3003_1968_1971_2640_0.8417_PLA2	59	G	E	0.507	0.005	0.015	0.979	0.535889
N.naja_1915_1922_1929_1973_1988_1954_1860_1834_1934_1935_1993_3003_1968_1971_2640_0.8417_PLA2	60	C	B	0.059	0.018	0.047	0.935	0.528556
N.naja_1915_1922_1929_1973_1988_1954_1860_1834_1934_1935_1993_3003_1968_1971_2640_0.8417_PLA2	61	W	E	0.307	0.019	0.141	0.84	0.541667
N.naja_1915_1922_1929_1973_1988_1954_1860_1834_1934_1935_1993_3003_1968_1971_2640_0.8417_PLA2	62	P	E	0.342	0.005	0.262	0.733	0.535
N.naja_1915_1922_1929_1973_1988_1954_1860_1834_1934_1935_1993_3003_1968_1971_2640_0.8417_PLA2	63	Y	E	0.345	0.004	0.42	0.576	0.530333
N.naja_1915_1922_1929_1973_1988_1954_1860_1834_1934_1935_1993_3003_1968_1971_2640_0.8417_PLA2	64	F	B	0.261	0.004	0.616	0.381	0.519889
N.naja_1915_1922_1929_1973_1988_1954_1860_1834_1934_1935_1993_3003_1968_1971_2640_0.8417_PLA2	65	K	E	0.38	0.004	0.514	0.481	0.513667
N.naja_1915_1922_1929_1973_1988_1954_1860_1834_1934_1935_1993_3003_1968_1971_2640_0.8417_PLA2	66	T	E	0.392	0.004	0.616	0.381	0.490333
N.naja_1915_1922_1929_1973_1988_1954_1860_1834_1934_1935_1993_3003_1968_1971_2640_0.8417_PLA2	67	Y	B	0.098	0.004	0.616	0.381	0.474111
N.naja_1915_1922_1929_1973_1988_1954_1860_1834_1934_1935_1993_3003_1968_1971_2640_0.8417_PLA2	68	S	E	0.418	0.002	0.816	0.182	0.462111
N.naja_1915_1922_1929_1973_1988_1954_1860_1834_1934_1935_1993_3003_1968_1971_2640_0.8417_PLA2	69	Y	B	0.098	0.001	0.9	0.099	0.455778
N.naja_1915_1922_1929_1973_1988_1954_1860_1834_1934_1935_1993_3003_1968_1971_2640_0.8417_PLA2	70	E	E	0.394	0.011	0.918	0.071	0.445778
N.naja_1915_1922_1929_1973_1988_1954_1860_1834_1934_1935_1993_3003_1968_1971_2640_0.8417_PLA2	71	C	B	0.132	0.001	0.9	0.099	0.443889
N.naja_1915_1922_1929_1973_1988_1954_1860_1834_1934_1935_1993_3003_1968_1971_2640_0.8417_PLA2	72	S	E	0.544	0.003	0.718	0.279	0.432
N.naja_1915_1922_1929_1973_1988_1954_1860_1834_1934_1935_1993_3003_1968_1971_2640_0.8417_PLA2	73	Q	E	0.72	0.005	0.045	0.951	0.427222
N.naja_1915_1922_1929_1973_1988_1954_1860_1834_1934_1935_1993_3003_1968_1971_2640_0.8417_PLA2	74	G	E	0.487	0.005	0.015	0.979	0.414333
N.naja_1915_1922_1929_1973_1988_1954_1860_1834_1934_1935_1993_3003_1968_1971_2640_0.8417_PLA2	75	T	E	0.555	0.004	0.616	0.381	0.432667
N.naja_1915_1922_1929_1973_1988_1954_1860_1834_1934_1935_1993_3003_1968_1971_2640_0.8417_PLA2	76	L	B	0.059	0.002	0.816	0.182	0.451111
N.naja_1915_1922_1929_1973_1988_1954_1860_1834_1934_1935_1993_3003_1968_1971_2640_0.8417_PLA2	77	T	E	0.369	0.001	0.9	0.099	0.458556
N.naja_1915_1922_1929_1973_1988_1954_1860_1834_1934_1935_1993_3003_1968_1971_2640_0.8417_PLA2	78	C	B	0.031	0.002	0.816	0.182	0.462333
N.naja_1915_1922_1929_1973_1988_1954_1860_1834_1934_1935_1993_3003_1968_1971_2640_0.8417_PLA2	79	K	E	0.465	0.005	0.262	0.733	0.468667
N.naja_1915_1922_1929_1973_1988_1954_1860_1834_1934_1935_1993_3003_1968_1971_2640_0.8417_PLA2	80	G	E	0.517	0.005	0.045	0.951	0.482333
N.naja_1915_1922_1929_1973_1988_1954_1860_1834_1934_1935_1993_3003_1968_1971_2640_0.8417_PLA2	81	D	E	0.751	0.005	0.015	0.979	0.486222
N.naja_1915_1922_1929_1973_1988_1954_1860_1834_1934_1935_1993_3003_1968_1971_2640_0.8417_PLA2	82	N	E	0.656	0.053	0.005	0.942	0.488333
N.naja_1915_1922_1929_1973_1988_1954_1860_1834_1934_1935_1993_3003_1968_1971_2640_0.8417_PLA2	83	N	E	0.533	0.176	0.004	0.82	0.503111
N.naja_1915_1922_1929_1973_1988_1954_1860_1834_1934_1935_1993_3003_1968_1971_2640_0.8417_PLA2	84	A	E	0.449	0.782	0.003	0.216	0.488778
N.naja_1915_1922_1929_1973_1988_1954_1860_1834_1934_1935_1993_3003_1968_1971_2640_0.8417_PLA2	85	C	B	0.046	0.782	0.003	0.216	0.475556
N.naja_1915_1922_1929_1973_1988_1954_1860_1834_1934_1935_1993_3003_1968_1971_2640_0.8417_PLA2	86	A	B	0.265	0.879	0.01	0.111	0.465222
N.naja_1915_1922_1929_1973_1988_1954_1860_1834_1934_1935_1993_3003_1968_1971_2640_0.8417_PLA2	87	A	E	0.517	0.879	0.01	0.111	0.462333
N.naja_1915_1922_1929_1973_1988_1954_1860_1834_1934_1935_1993_3003_1968_1971_2640_0.8417_PLA2	88	S	E	0.297	0.879	0.01	0.111	0.432889
N.naja_1915_1922_1929_1973_1988_1954_1860_1834_1934_1935_1993_3003_1968_1971_2640_0.8417_PLA2	89	V	B	0.14	0.879	0.01	0.111	0.419
N.naja_1915_1922_1929_1973_1988_1954_1860_1834_1934_1935_1993_3003_1968_1971_2640_0.8417_PLA2	90	C	B	0.065	0.802	0.014	0.185	0.428889
N.naja_1915_1922_1929_1973_1988_1954_1860_1834_1934_1935_1993_3003_1968_1971_2640_0.8417_PLA2	91	D	E	0.509	0.782	0.003	0.216	0.436556
N.naja_1915_1922_1929_1973_1988_1954_1860_1834_1934_1935_1993_3003_1968_1971_2640_0.8417_PLA2	92	C	B	0.051	0.694	0.003	0.303	0.424667
N.naja_1915_1922_1929_1973_1988_1954_1860_1834_1934_1935_1993_3003_1968_1971_2640_0.8417_PLA2	93	D	B	0.173	0.694	0.003	0.303	0.414
N.naja_1915_1922_1929_1973_1988_1954_1860_1834_1934_1935_1993_3003_1968_1971_2640_0.8417_PLA2	94	R	E	0.368	0.97	0.001	0.03	0.418333
N.naja_1915_1922_1929_1973_1988_1954_1860_1834_1934_1935_1993_3003_1968_1971_2640_0.8417_PLA2	95	L	B	0.299	0.97	0.001	0.03	0.404667
N.naja_1915_1922_1929_1973_1988_1954_1860_1834_1934_1935_1993_3003_1968_1971_2640_0.8417_PLA2	96	A	B	0.032	0.97	0.001	0.03	0.389444
N.naja_1915_1922_1929_1973_1988_1954_1860_1834_1934_1935_1993_3003_1968_1971_2640_0.8417_PLA2	97	A	B	0.041	0.97	0.001	0.03	0.408222
N.naja_1915_1922_1929_1973_1988_1954_1860_1834_1934_1935_1993_3003_1968_1971_2640_0.8417_PLA2	98	I	E	0.297	0.97	0.001	0.03	0.418889
N.naja_1915_1922_1929_1973_1988_1954_1860_1834_1934_1935_1993_3003_1968_1971_2640_0.8417_PLA2	99	C	B	0.024	0.923	0.002	0.076	0.419778
N.naja_1915_1922_1929_1973_1988_1954_1860_1834_1934_1935_1993_3003_1968_1971_2640_0.8417_PLA2	100	F	B	0.056	0.782	0.003	0.216	0.423444
N.naja_1915_1922_1929_1973_1988_1954_1860_1834_1934_1935_1993_3003_1968_1971_2640_0.8417_PLA2	101	A	E	0.326	0.6	0.003	0.397	0.442444
N.naja_1915_1922_1929_1973_1988_1954_1860_1834_1934_1935_1993_3003_1968_1971_2640_0.8417_PLA2	102	G	E	0.588	0.321	0.003	0.675	0.465111
N.naja_1915_1922_1929_1973_1988_1954_1860_1834_1934_1935_1993_3003_1968_1971_2640_0.8417_PLA2	103	A	B	0.168	0.053	0.005	0.942	0.490444
N.naja_1915_1922_1929_1973_1988_1954_1860_1834_1934_1935_1993_3003_1968_1971_2640_0.8417_PLA2	104	P	E	0.563	0.058	0.017	0.925	0.529333
N.naja_1915_1922_1929_1973_1988_1954_1860_1834_1934_1935_1993_3003_1968_1971_2640_0.8417_PLA2	105	Y	B	0.225	0.053	0.043	0.903	0.562222
N.naja_1915_1922_1929_1973_1988_1954_1860_1834_1934_1935_1993_3003_1968_1971_2640_0.8417_PLA2	106	N	B	0.205	0.053	0.043	0.903	0.583778
N.naja_1915_1922_1929_1973_1988_1954_1860_1834_1934_1935_1993_3003_1968_1971_2640_0.8417_PLA2	107	D	E	0.54	0.354	0.048	0.598	0.597667
N.naja_1915_1922_1929_1973_1988_1954_1860_1834_1934_1935_1993_3003_1968_1971_2640_0.8417_PLA2	108	N	E	0.619	0.339	0.016	0.645	0.602444
N.naja_1915_1922_1929_1973_1988_1954_1860_1834_1934_1935_1993_3003_1968_1971_2640_0.8417_PLA2	109	N	E	0.334	0.339	0.016	0.645	0.605444
N.naja_1915_1922_1929_1973_1988_1954_1860_1834_1934_1935_1993_3003_1968_1971_2640_0.8417_PLA2	110	Y	E	0.287	0.257	0.016	0.727	0.620333
N.naja_1915_1922_1929_1973_1988_1954_1860_1834_1934_1935_1993_3003_1968_1971_2640_0.8417_PLA2	111	N	E	0.502	0.113	0.043	0.844	0.633667
N.naja_1915_1922_1929_1973_1988_1954_1860_1834_1934_1935_1993_3003_1968_1971_2640_0.8417_PLA2	112	I	B	0.214	0.053	0.043	0.903	0.62
N.naja_1915_1922_1929_1973_1988_1954_1860_1834_1934_1935_1993_3003_1968_1971_2640_0.8417_PLA2	113	D	E	0.415	0.018	0.019	0.964	0.609667
N.naja_1915_1922_1929_1973_1988_1954_1860_1834_1934_1935_1993_3003_1968_1971_2640_0.8417_PLA2	114	L	E	0.519	0.018	0.019	0.964	0.584778
N.naja_1915_1922_1929_1973_1988_1954_1860_1834_1934_1935_1993_3003_1968_1971_2640_0.8417_PLA2	115	K	E	0.546	0.018	0.019	0.964	0.578667
N.naja_1915_1922_1929_1973_1988_1954_1860_1834_1934_1935_1993_3003_1968_1971_2640_0.8417_PLA2	116	A	E	0.534	0.018	0.019	0.964	0.504
N.naja_1915_1922_1929_1973_1988_1954_1860_1834_1934_1935_1993_3003_1968_1971_2640_0.8417_PLA2	117	R	E	0.487	0.018	0.019	0.964	0.442
N.naja_1915_1922_1929_1973_1988_1954_1860_1834_1934_1935_1993_3003_1968_1971_2640_0.8417_PLA2	118	C	B	0.088	0.018	0.019	0.964	0.378333
N.naja_1915_1922_1929_1973_1988_1954_1860_1834_1934_1935_1993_3003_1968_1971_2640_0.8417_PLA2	119	Q	E	0.717	0.003	0.003	0.994	0.308778
N.naja_1932_1965_1974_1874_1933_0.3783_PLA2	1	N	E	0.732	0.003	0.003	0.994	0.251333
N.naja_1932_1965_1974_1874_1933_0.3783_PLA2	2	L	E	0.271	0.802	0.014	0.185	0.316556
N.naja_1932_1965_1974_1874_1933_0.3783_PLA2	3	Y	E	0.285	0.879	0.01	0.111	0.368667
N.naja_1932_1965_1974_1874_1933_0.3783_PLA2	4	Q	E	0.342	0.879	0.01	0.111	0.404889
N.naja_1932_1965_1974_1874_1933_0.3783_PLA2	5	F	B	0.062	0.938	0.007	0.055	0.442111
N.naja_1932_1965_1974_1874_1933_0.3783_PLA2	6	K	B	0.256	0.938	0.007	0.055	0.468444
N.naja_1932_1965_1974_1874_1933_0.3783_PLA2	7	N	E	0.418	0.938	0.007	0.055	0.468444
N.naja_1932_1965_1974_1874_1933_0.3783_PLA2	8	M	B	0.064	0.975	0.003	0.022	0.461333
N.naja_1932_1965_1974_1874_1933_0.3783_PLA2	9	I	B	0.035	0.938	0.007	0.055	0.443556
N.naja_1932_1965_1974_1874_1933_0.3783_PLA2	10	K	E	0.328	0.938	0.007	0.055	0.465778
N.naja_1932_1965_1974_1874_1933_0.3783_PLA2	11	C	B	0.2	0.879	0.01	0.111	0.459667
N.naja_1932_1965_1974_1874_1933_0.3783_PLA2	12	T	B	0.147	0.802	0.014	0.185	0.472556
N.naja_1932_1965_1974_1874_1933_0.3783_PLA2	13	V	B	0.115	0.43	0.016	0.555	0.496111
N.naja_1932_1965_1974_1874_1933_0.3783_PLA2	14	P	E	0.457	0.058	0.017	0.925	0.507667
N.naja_1932_1965_1974_1874_1933_0.3783_PLA2	15	S	E	0.449	0.018	0.019	0.964	0.508111
N.naja_1932_1965_1974_1874_1933_0.3783_PLA2	16	R	B	0.317	0.018	0.019	0.964	0.510889
N.naja_1932_1965_1974_1874_1933_0.3783_PLA2	17	S	B	0.083	0.058	0.017	0.925	0.512333
N.naja_1932_1965_1974_1874_1933_0.3783_PLA2	18	W	B	0.089	0.339	0.016	0.645	0.533111
N.naja_1932_1965_1974_1874_1933_0.3783_PLA2	19	W	B	0.245	0.354	0.048	0.598	0.524889
N.naja_1932_1965_1974_1874_1933_0.3783_PLA2	20	D	B	0.253	0.386	0.097	0.517	0.520444
N.naja_1932_1965_1974_1874_1933_0.3783_PLA2	21	F	B	0.066	0.386	0.097	0.517	0.506778
N.naja_1932_1965_1974_1874_1933_0.3783_PLA2	22	A	E	0.301	0.386	0.097	0.517	0.488889
N.naja_1932_1965_1974_1874_1933_0.3783_PLA2	23	D	E	0.396	0.191	0.086	0.723	0.493111
N.naja_1932_1965_1974_1874_1933_0.3783_PLA2	24	Y	B	0.056	0.052	0.084	0.864	0.474444
N.naja_1932_1965_1974_1874_1933_0.3783_PLA2	25	G	B	0.047	0.019	0.141	0.84	0.463222
N.naja_1932_1965_1974_1874_1933_0.3783_PLA2	26	C	B	0.027	0.022	0.359	0.619	0.471889
N.naja_1932_1965_1974_1874_1933_0.3783_PLA2	27	Y	B	0.08	0.021	0.451	0.528	0.470111
N.naja_1932_1965_1974_1874_1933_0.3783_PLA2	28	C	B	0.021	0.021	0.451	0.528	0.468222
N.naja_1932_1965_1974_1874_1933_0.3783_PLA2	29	G	B	0.074	0.021	0.279	0.699	0.489222
N.naja_1932_1965_1974_1874_1933_0.3783_PLA2	30	R	E	0.321	0.018	0.088	0.893	0.513222
N.naja_1932_1965_1974_1874_1933_0.3783_PLA2	31	G	B	0.273	0.005	0.045	0.951	0.545556
N.naja_1932_1965_1974_1874_1933_0.3783_PLA2	32	G	B	0.248	0.005	0.045	0.951	0.560333
N.naja_1932_1965_1974_1874_1933_0.3783_PLA2	33	S	E	0.574	0.018	0.047	0.935	0.575333
N.naja_1932_1965_1974_1874_1933_0.3783_PLA2	34	G	E	0.4	0.018	0.047	0.935	0.606
N.naja_1932_1965_1974_1874_1933_0.3783_PLA2	35	T	E	0.441	0.005	0.015	0.979	0.618
N.naja_1932_1965_1974_1874_1933_0.3783_PLA2	36	P	E	0.311	0.018	0.047	0.935	0.617556
N.naja_1932_1965_1974_1874_1933_0.3783_PLA2	37	V	E	0.447	0.053	0.043	0.903	0.624667
N.naja_1932_1965_1974_1874_1933_0.3783_PLA2	38	D	E	0.502	0.053	0.043	0.903	0.613889
N.naja_1932_1965_1974_1874_1933_0.3783_PLA2	39	D	E	0.54	0.053	0.043	0.903	0.588111
N.naja_1932_1965_1974_1874_1933_0.3783_PLA2	40	L	E	0.321	0.113	0.087	0.8	0.567889
N.naja_1932_1965_1974_1874_1933_0.3783_PLA2	41	D	E	0.333	0.191	0.086	0.723	0.561667
N.naja_1932_1965_1974_1874_1933_0.3783_PLA2	42	R	E	0.34	0.278	0.093	0.628	0.562889
N.naja_1932_1965_1974_1874_1933_0.3783_PLA2	43	C	B	0.041	0.278	0.093	0.628	0.546333
N.naja_1932_1965_1974_1874_1933_0.3783_PLA2	44	C	B	0.064	0.307	0.165	0.527	0.530444
N.naja_1932_1965_1974_1874_1933_0.3783_PLA2	45	Q	E	0.401	0.199	0.152	0.649	0.527
N.naja_1932_1965_1974_1874_1933_0.3783_PLA2	46	V	E	0.395	0.113	0.043	0.844	0.504778
N.naja_1932_1965_1974_1874_1933_0.3783_PLA2	47	H	B	0.193	0.058	0.017	0.925	0.492556
N.naja_1932_1965_1974_1874_1933_0.3783_PLA2	48	D	E	0.571	0.058	0.017	0.925	0.496
N.naja_1932_1965_1974_1874_1933_0.3783_PLA2	49	N	B	0.231	0.339	0.016	0.645	0.490556
N.naja_1932_1965_1974_1874_1933_0.3783_PLA2	50	C	B	0.04	0.622	0.015	0.363	0.469889
N.naja_1932_1965_1974_1874_1933_0.3783_PLA2	51	Y	B	0.11	0.879	0.01	0.111	0.473889
N.naja_1932_1965_1974_1874_1933_0.3783_PLA2	52	N	E	0.536	0.858	0.002	0.139	0.467556
N.naja_1932_1965_1974_1874_1933_0.3783_PLA2	53	E	E	0.385	0.879	0.01	0.111	0.469
N.naja_1932_1965_1974_1874_1933_0.3783_PLA2	54	A	B	0.048	0.858	0.002	0.139	0.468444
N.naja_1932_1965_1974_1874_1933_0.3783_PLA2	55	E	E	0.501	0.802	0.014	0.185	0.489778
N.naja_1932_1965_1974_1874_1933_0.3783_PLA2	56	K	E	0.743	0.622	0.015	0.363	0.490222
N.naja_1932_1965_1974_1874_1933_0.3783_PLA2	57	I	E	0.26	0.181	0.016	0.803	0.505556
N.naja_1932_1965_1974_1874_1933_0.3783_PLA2	58	S	E	0.648	0.016	0.005	0.979	0.519333
N.naja_1932_1965_1974_1874_1933_0.3783_PLA2	59	K	E	0.537	0.018	0.019	0.964	0.539778
N.naja_1932_1965_1974_1874_1933_0.3783_PLA2	60	C	B	0.062	0.018	0.047	0.935	0.536778
N.naja_1932_1965_1974_1874_1933_0.3783_PLA2	61	W	E	0.317	0.019	0.141	0.84	0.549778
N.naja_1932_1965_1974_1874_1933_0.3783_PLA2	62	P	E	0.359	0.005	0.262	0.733	0.546
N.naja_1932_1965_1974_1874_1933_0.3783_PLA2	63	F	E	0.324	0.004	0.42	0.576	0.543222
N.naja_1932_1965_1974_1874_1933_0.3783_PLA2	64	F	B	0.223	0.004	0.514	0.481	0.531444
N.naja_1932_1965_1974_1874_1933_0.3783_PLA2	65	K	E	0.412	0.004	0.42	0.576	0.526
N.naja_1932_1965_1974_1874_1933_0.3783_PLA2	66	T	E	0.416	0.004	0.514	0.481	0.498667
N.naja_1932_1965_1974_1874_1933_0.3783_PLA2	67	Y	B	0.09	0.004	0.616	0.381	0.481
N.naja_1932_1965_1974_1874_1933_0.3783_PLA2	68	S	E	0.428	0.002	0.816	0.182	0.469667
N.naja_1932_1965_1974_1874_1933_0.3783_PLA2	69	Y	B	0.091	0.001	0.9	0.099	0.461667
N.naja_1932_1965_1974_1874_1933_0.3783_PLA2	70	K	E	0.42	0.011	0.918	0.071	0.453556
N.naja_1932_1965_1974_1874_1933_0.3783_PLA2	71	C	B	0.132	0.001	0.9	0.099	0.449333
N.naja_1932_1965_1974_1874_1933_0.3783_PLA2	72	S	E	0.573	0.003	0.718	0.279	0.439444
N.naja_1932_1965_1974_1874_1933_0.3783_PLA2	73	Q	E	0.714	0.005	0.045	0.951	0.434
N.naja_1932_1965_1974_1874_1933_0.3783_PLA2	74	G	E	0.513	0.005	0.015	0.979	0.418556
N.naja_1932_1965_1974_1874_1933_0.3783_PLA2	75	T	E	0.521	0.004	0.514	0.481	0.436222
N.naja_1932_1965_1974_1874_1933_0.3783_PLA2	76	L	B	0.064	0.002	0.816	0.182	0.455778
N.naja_1932_1965_1974_1874_1933_0.3783_PLA2	77	T	E	0.356	0.001	0.9	0.099	0.467889
N.naja_1932_1965_1974_1874_1933_0.3783_PLA2	78	C	B	0.034	0.001	0.9	0.099	0.473667
N.naja_1932_1965_1974_1874_1933_0.3783_PLA2	79	K	E	0.459	0.005	0.336	0.66	0.484556
N.naja_1932_1965_1974_1874_1933_0.3783_PLA2	80	G	E	0.642	0.005	0.045	0.951	0.493889
N.naja_1932_1965_1974_1874_1933_0.3783_PLA2	81	G	E	0.635	0.003	0.003	0.994	0.499111
N.naja_1932_1965_1974_1874_1933_0.3783_PLA2	82	N	E	0.659	0.053	0.005	0.942	0.501889
N.naja_1932_1965_1974_1874_1933_0.3783_PLA2	83	N	E	0.54	0.176	0.004	0.82	0.517333
N.naja_1932_1965_1974_1874_1933_0.3783_PLA2	84	A	E	0.444	0.782	0.003	0.216	0.502111
N.naja_1932_1965_1974_1874_1933_0.3783_PLA2	85	C	B	0.041	0.858	0.002	0.139	0.481111
N.naja_1932_1965_1974_1874_1933_0.3783_PLA2	86	A	B	0.228	0.938	0.007	0.055	0.465444
N.naja_1932_1965_1974_1874_1933_0.3783_PLA2	87	A	E	0.504	0.938	0.007	0.055	0.463
N.naja_1932_1965_1974_1874_1933_0.3783_PLA2	88	S	B	0.265	0.923	0.002	0.076	0.427
N.naja_1932_1965_1974_1874_1933_0.3783_PLA2	89	V	B	0.11	0.923	0.002	0.076	0.413889
N.naja_1932_1965_1974_1874_1933_0.3783_PLA2	90	C	B	0.069	0.923	0.002	0.076	0.421778
N.naja_1932_1965_1974_1874_1933_0.3783_PLA2	91	D	E	0.471	0.923	0.002	0.076	0.426778
N.naja_1932_1965_1974_1874_1933_0.3783_PLA2	92	C	B	0.037	0.923	0.002	0.076	0.415556
N.naja_1932_1965_1974_1874_1933_0.3783_PLA2	93	D	B	0.119	0.923	0.002	0.076	0.404778
N.naja_1932_1965_1974_1874_1933_0.3783_PLA2	94	R	E	0.364	0.988	0	0.012	0.413444
N.naja_1932_1965_1974_1874_1933_0.3783_PLA2	95	L	B	0.216	0.988	0	0.012	0.402778
N.naja_1932_1965_1974_1874_1933_0.3783_PLA2	96	A	B	0.027	0.988	0	0.012	0.386111
N.naja_1932_1965_1974_1874_1933_0.3783_PLA2	97	A	B	0.038	0.988	0	0.012	0.405444
N.naja_1932_1965_1974_1874_1933_0.3783_PLA2	98	I	E	0.261	0.97	0.001	0.03	0.419
N.naja_1932_1965_1974_1874_1933_0.3783_PLA2	99	C	B	0.02	0.97	0.001	0.03	0.419667
[truncated: 17,752 more rows]

## Sheet: PLA2 Bepipred analysis
		epitope threshold	0.5																	AA residue	1	2	3	4	5	6	7	8	9	10	11	12	13	14	15	16	17	18	19	20	21	22	23	24	25	26	27	28	29
																				80% AA conservation				*	*	*	*	*				*	*	*	*				*			*	*		*	*	*	*	*
Entry	Position	AminoAcid	Exposed/Buried	RelativeSurfaceAccessilibity	HelixProbability	SheetProbability	CoilProbability	EpitopeProbability						N.haje.UGA_1903_0.0439098483642701_PLA2						N.haje.UGA_1903_PLA2	L	N	L	Y	Q	F	K	N	M	I	H	C	T	V	P	S	R	P	W	W	H	F	A	D	Y	G	C	Y	C
N.haje.UGA_1903_0.0439098483642701_PLA2	1	L	B	0.477	0.003	0.003	0.994	0.263556						N.haje.UGA_1906_0.0439098483642701_PLA2						N.haje.UGA_1906_PLA2		N	L	Y	Q	F	K	N	M	I	H	C	T	V	P	N	R	P	W	W	H	F	A	N	Y	G	C	Y	C
N.haje.UGA_1903_0.0439098483642701_PLA2	2	N	B	0.356	0.053	0.043	0.903	0.305333						N.melanoleuca_1875_1710_1608_7.7707_PLA2						N.melanoleuca_1875_PLA2		N	L	Y	Q	F	K	N	M	I	Q	C	T	V	P	N	R	S	W	W	H	F	A	N	Y	G	C	Y	C
N.haje.UGA_1903_0.0439098483642701_PLA2	3	L	B	0.199	0.938	0.007	0.055	0.369111						N.melanoleuca_1933_1786_1808_2025_2511_1820_1826_2497_7.3519_PLA2						N.melanoleuca_1933_PLA2		N	L	Y	Q	F	K	N	M	I	H	C	T	V	P	N	R	S	W	W	H	F	A	N	Y	G	C	Y	C
N.haje.UGA_1903_0.0439098483642701_PLA2	4	Y	B	0.253	0.938	0.007	0.055	0.420333						N.melanoleuca_2641_1713_1779_2166_1748_2417_1706_2264_2895_2976_2.0218_PLA2						N.melanoleuca_2641_PLA2	L	N	L	Y	Q	F	K	N	M	I	Q	C	T	V	P	N	R	S	W	W	H	F	A	D	Y	G	C	Y	C
N.haje.UGA_1903_0.0439098483642701_PLA2	5	Q	B	0.275	0.938	0.007	0.055	0.455778						N.melanoleuca_2841_1526_1716_0.7434_PLA2						N.melanoleuca_2841_PLA2		N	L	Y	Q	F	K	N	M	I	H	C	T	V	P	N	R	P	W	W	H	F	A	N	Y	G	C	Y	C
N.haje.UGA_1903_0.0439098483642701_PLA2	6	F	B	0.053	0.938	0.007	0.055	0.454333						N.mossambica_1210_1102_1125_1292_10.3747_PLA2						N.mossambica_1210_PLA2	L	N	L	Y	Q	F	K	N	M	I	H	C	T	V	P	S	R	P	W	W	H	F	A	D	Y	G	C	Y	C
N.haje.UGA_1903_0.0439098483642701_PLA2	7	K	B	0.203	0.923	0.002	0.076	0.472889						N.mossambica_1223_1093_0.0180_PLA2						N.mossambica_1223_PLA2		N	L	Y	Q	F	K	N	M	I	H	C	T	V	P	S	R	P	W	W	H	F	A	D	Y	G	C	Y	C
N.haje.UGA_1903_0.0439098483642701_PLA2	8	N	B	0.376	0.97	0.001	0.03	0.465333						N.mossambica_1296_1371_1364_1434_1322_1339_1043_1.7546_PLA2						N.mossambica_1296_PLA2	L	N	L	Y	Q	F	K	N	M	I	H	C	T	V	P	S	R	P	W	W	H	F	A	D	Y	G	C	Y	C
N.haje.UGA_1903_0.0439098483642701_PLA2	9	M	B	0.06	0.97	0.001	0.03	0.455333						N.mossambica_1842_2249_1387_2278_1462_1062_1333_1413_1420_2090_4.4331_PLA2						N.mossambica_1842_PLA2	L	N	L	Y	Q	F	K	N	M	I	H	C	T	V	P	S	R	P	W	W	H	F	A	D	Y	G	C	Y	C
N.haje.UGA_1903_0.0439098483642701_PLA2	10	I	B	0.031	0.97	0.001	0.03	0.426667						N.mossambica_1851_2222_931_1483_1321_2417_1416_974_1057_0.4912_PLA2						N.mossambica_1851_PLA2		N	L	Y	Q	F	K	N	M	I	H	C	T	V	P	S	R	P	W	W	H	F	A	D	Y	G	C	Y	C
N.haje.UGA_1903_0.0439098483642701_PLA2	11	H	B	0.335	0.938	0.007	0.055	0.452667						N.mossambica_2269_0.324915476505541_PLA2						N.mossambica_2269_PLA2		N	L	Y	Q	F	K	N	M	I	Q	C	T	V	P	N	R	S	W	W	D	F	A	D	Y	G	C	Y	C
N.haje.UGA_1903_0.0439098483642701_PLA2	12	C	B	0.216	0.938	0.007	0.055	0.444444						N.mossambica_956_2283_1048_0.5086_PLA2						N.mossambica_956_PLA2		N	L	Y	Q	F	K	N	M	I	H	C	T	V	P	S	R	P	W	W	H	F	A	D	Y	G	C	Y	C
N.haje.UGA_1903_0.0439098483642701_PLA2	13	T	B	0.165	0.802	0.014	0.185	0.456444						N.mossambica_976_0.0051078127118414_PLA2						N.mossambica_976_PLA2		N	L	Y	Q	F	K	N	M	I	H	C	T	V	P	S	R	P	W	W	H	F	A	D	Y	G	C	Y	C
N.haje.UGA_1903_0.0439098483642701_PLA2	14	V	B	0.134	0.339	0.016	0.645	0.477444						N.naja_1810_1899_0.2332_PLA2						N.naja_1810_PLA2		N	L	Y	Q	F	K	N	M	I	K	C	T	V	P	S	R	S	W	W	D	F	A	D	Y	G	C	Y	C
N.haje.UGA_1903_0.0439098483642701_PLA2	15	P	B	0.522	0.058	0.017	0.925	0.492						N.naja_1915_1922_1929_1973_1988_1954_1860_1834_1934_1935_1993_3003_1968_1971_2640_0.8417_PLA2						N.naja_1915_PLA2		N	L	Y	Q	F	K	N	M	I	K	C	T	V	P	S	R	S	W	W	D	F	A	D	Y	G	C	Y	C
N.haje.UGA_1903_0.0439098483642701_PLA2	16	S	B	0.501	0.016	0.005	0.979	0.489222						N.naja_1932_1965_1974_1874_1933_0.3783_PLA2						N.naja_1932_PLA2		N	L	Y	Q	F	K	N	M	I	K	C	T	V	P	S	R	S	W	W	D	F	A	D	Y	G	C	Y	C
N.haje.UGA_1903_0.0439098483642701_PLA2	17	R	B	0.268	0.018	0.019	0.964	0.498667						N.naja_1936_0.0128141515563217_PLA2						N.naja_1936_PLA2		N	L	Y	Q	F	K	N	M	I	Q	C	T	V	P	S	R	S	W	W	D	F	A	D	Y	G	C	Y	C
N.haje.UGA_1903_0.0439098483642701_PLA2	18	P	B	0.095	0.058	0.017	0.925	0.497222						N.naja_1983_1878_0.0615_PLA2						N.naja_1983_PLA2		N	L	Y	Q	F	K	N	M	I	E	C	T	V	P	A	R	S	W	W	D	F	A	D	Y	G	C	Y	C
N.haje.UGA_1903_0.0439098483642701_PLA2	19	W	E	0.118	0.268	0.043	0.689	0.512444						N.naja_2013_0.0111412575811514_PLA2						N.naja_2013_PLA2		N	L	Y	Q	F	K	N	M	I	Q	C	T	V	P	S	R	S	W	W	D	F	A	D	Y	G	C	Y	C
N.haje.UGA_1903_0.0439098483642701_PLA2	20	W	E	0.186	0.268	0.043	0.689	0.502889						N.naja_2107_1914_0.0078_PLA2						N.naja_2107_PLA2		N	L	Y	Q	F	K	N	M	I	Q	C	T	V	P	N	R	S	W	W	D	F	A	D	Y	G	C	Y	C
N.haje.UGA_1903_0.0439098483642701_PLA2	21	H	B	0.214	0.386	0.097	0.517	0.499667						N.naja_2188_0.00112695067314748_PLA2						N.naja_2188_PLA2	L	N	L	Y	Q	F	K	N	M	I	Q	C	T	V	P	N	R	S	W	W	D	F	A	D	Y	G	C	Y	C
N.haje.UGA_1903_0.0439098483642701_PLA2	22	F	B	0.069	0.428	0.171	0.402	0.486778						N.naja_2418_0.00735031660517128_PLA2						N.naja_2418_PLA2		N	I	Y	Q	F	K	N	M	I	E	C	T	V	P	A	R	S	W	W	D	F	A	D	Y	G	C	Y	C
N.haje.UGA_1903_0.0439098483642701_PLA2	23	A	B	0.248	0.278	0.093	0.628	0.473889						N.naja_3006_0.00847873475785663_PLA2						N.naja_3006_PLA2		N	T	Y	Q	F	K	N	M	I	Q	C	T	V	P	K	R	S	W	W	D	F	A	D	Y	G	C	Y	C
N.haje.UGA_1903_0.0439098483642701_PLA2	24	D	B	0.33	0.191	0.086	0.723	0.476778						N.nigricollis.NGA_1024_1008_PLA2_0.9623						N.nigricollis.NGA_1024_PLA2		N	L	Y	Q	F	K	N	M	I	H	C	T	V	P	S	R	P	W	W	H	F	A	D	Y	G	C	Y	C
N.haje.UGA_1903_0.0439098483642701_PLA2	25	Y	B	0.051	0.052	0.084	0.864	0.461111						N.nigricollis.NGA_1065_1063_995_PLA2_1.5168						N.nigricollis.NGA_1065_PLA2		N	L	Y	Q	F	K	N	M	I	H	C	T	V	P	S	R	P	W	W	H	F	A	D	Y	G	C	Y	C
N.haje.UGA_1903_0.0439098483642701_PLA2	26	G	B	0.043	0.019	0.141	0.84	0.449667						N.nigricollis.NGA_1067_1021_PLA2_1.6333						N.nigricollis.NGA_1067_PLA2	L	N	L	Y	Q	F	K	N	M	I	H	C	T	V	P	S	R	P	W	W	H	F	A	D	Y	G	C	Y	C
N.haje.UGA_1903_0.0439098483642701_PLA2	27	C	B	0.026	0.022	0.359	0.619	0.461667						N.nigricollis.NGA_1245_1324_1351_1349_1284_1292_1328_1330_1334_1313_1310_1312_1300_1244_PLA2_6.3434						N.nigricollis.NGA_1245_PLA2	L	N	L	Y	Q	F	K	N	M	I	H	C	T	V	P	S	R	P	W	W	H	F	A	D	Y	G	C	Y	C
N.haje.UGA_1903_0.0439098483642701_PLA2	28	Y	B	0.064	0.021	0.451	0.528	0.461						N.nigricollis.NGA_1353_1345_PLA2_0.7817						N.nigricollis.NGA_1353_PLA2		N	L	Y	Q	F	K	N	M	I	H	C	T	V	P	S	R	P	W	W	H	F	A	D	Y	G	C	Y	C
N.haje.UGA_1903_0.0439098483642701_PLA2	29	C	B	0.022	0.022	0.359	0.619	0.460556						N.nigricollis.NGA_1357_1343_PLA2_0.8166						N.nigricollis.NGA_1357_PLA2	L	N	L	Y	Q	F	K	N	M	I	H	C	T	V	P	S	R	P	W	W	H	F	A	D	Y	G	C	Y	C
N.haje.UGA_1903_0.0439098483642701_PLA2	30	G	B	0.062	0.02	0.205	0.775	0.487111						N.nigricollis.NGA_1362_1420_1346_PLA2_1.9714						N.nigricollis.NGA_1362_PLA2		N	L	Y	Q	F	K	N	M	I	H	C	T	V	P	S	R	P	W	W	H	F	A	D	Y	G	C	Y	C
N.haje.UGA_1903_0.0439098483642701_PLA2	31	R	E	0.308	0.018	0.088	0.893	0.510111						N.nigricollis.NGA_1403_PLA2_2.9209285085977						N.nigricollis.NGA_1403_PLA2		N	L	Y	Q	F	K	N	M	I	H	C	T	V	P	S	R	P	W	W	H	F	A	D	Y	G	C	Y	C
N.haje.UGA_1903_0.0439098483642701_PLA2	32	G	E	0.272	0.005	0.015	0.979	0.538111						N.nigricollis.TGO_1082_1116_1331_1165_1102_1114_1128_1155_1164_1153_1096_1204_1140_1159_1566_966_1455_1.2798_PLA2						N.nigricollis.TGO_1082_PLA2		N	L	Y	Q	F	K	N	M	I	H	C	T	V	P	S	R	P	W	W	H	F	A	D	Y	G	C	Y	C
N.haje.UGA_1903_0.0439098483642701_PLA2	33	G	E	0.256	0.005	0.015	0.979	0.552667						N.nigricollis.TGO_1137_4.19587863926498_PLA2						N.nigricollis.TGO_1137_PLA2			L	Y	Q	F	K	N	M	I	H	C	T	V	P	S	R	P	W	W	H	F	A	D	Y	G	C	Y	C
N.haje.UGA_1903_0.0439098483642701_PLA2	34	K	E	0.561	0.018	0.047	0.935	0.570444						N.nigricollis.TGO_1179_1287_1351_1127_1176_2.1814_PLA2						N.nigricollis.TGO_1179_PLA2	L	N	L	Y	Q	F	K	N	M	I	H	C	T	V	P	S	R	P	W	W	H	F	A	D	Y	G	C	Y	C
N.haje.UGA_1903_0.0439098483642701_PLA2	35	G	E	0.395	0.005	0.045	0.951	0.600333						N.nigricollis.TGO_1448_0.0721230424026042_PLA2						N.nigricollis.TGO_1448_PLA2		N	L	Y	Q	F	K	N	M	I	K	C	T	V	P	S	R	S	W	L	D	F	A	N	Y	G	C	Y	C
N.haje.UGA_1903_0.0439098483642701_PLA2	36	T	E	0.422	0.005	0.045	0.951	0.613778						N.nigricollis.TGO_1527_1217_1235_1513_1761_1611_2.1127_PLA2						N.nigricollis.TGO_1527_PLA2	L	N	L	Y	Q	F	K	N	M	I	H	C	T	V	P	S	R	P	W	W	H	F	A	D	Y	G	C	Y	C
N.haje.UGA_1903_0.0439098483642701_PLA2	37	P	E	0.286	0.018	0.047	0.935	0.615222						N.nigricollis.TGO_818_1029_888_973_859_2.0691_PLA2						N.nigricollis.TGO_818_PLA2	L	N	L	Y	Q	F	K	N	M	I	H	C	T	V	P	S	R	P	W	W	H	F	A	D	Y	G	C	Y	C
N.haje.UGA_1903_0.0439098483642701_PLA2	38	V	E	0.427	0.053	0.043	0.903	0.622667						N.nigricollis.TGO_910_0.0815836842973994_PLA2						N.nigricollis.TGO_910_PLA2		N	L	Y	Q	F	K	N	M	I	H	C	T	V	P	S	R	P	W	W	H	F	A	D	Y	G	C	Y	C
N.haje.UGA_1903_0.0439098483642701_PLA2	39	D	E	0.49	0.053	0.043	0.903	0.607889						N.nigricollis.TGO_912_0.1621942822401_PLA2						N.nigricollis.TGO_912_PLA2		N	L	Y	Q	F	K	N	M	I	H	C	T	V	P	S	R	P	W	W	H	F	A	D	Y	G	C	Y	C
N.haje.UGA_1903_0.0439098483642701_PLA2	40	D	E	0.54	0.052	0.084	0.864	0.586333						N.nigricollis.TZA_1240_1654_5.3454_PLA2						N.nigricollis.TZA_1240_PLA2	L	N	L	Y	Q	F	K	N	M	I	H	C	T	V	P	S	R	P	W	W	H	F	A	D	Y	G	C	Y	C
N.haje.UGA_1903_0.0439098483642701_PLA2	41	L	E	0.319	0.113	0.087	0.8	0.572444						N.nigricollis.TZA_1242_1180_2.2749_PLA2						N.nigricollis.TZA_1242_PLA2	L	N	L	Y	Q	F	K	N	M	I	H	C	T	V	P	S	R	P	W	W	H	F	A	D	Y	G	C	Y	C
N.haje.UGA_1903_0.0439098483642701_PLA2	42	D	E	0.3	0.113	0.087	0.8	0.569444						N.nigricollis.TZA_1248_0.518541049538747_PLA2						N.nigricollis.TZA_1248_PLA2		N	L	Y	Q	F	K	N	M	I	H	C	T	V	P	S	R	P	W	W	H	F	A	D	Y	G	C	Y	C
N.haje.UGA_1903_0.0439098483642701_PLA2	43	R	E	0.318	0.191	0.086	0.723	0.569						N.nigricollis.TZA_1270_1209_0.9197_PLA2						N.nigricollis.TZA_1270_PLA2		N	L	Y	Q	F	K	N	M	I	H	C	T	V	P	S	R	P	W	W	H	F	A	D	Y	G	C	Y	C
N.haje.UGA_1903_0.0439098483642701_PLA2	44	C	E	0.048	0.199	0.152	0.649	0.550222						N.nigricollis.TZA_1558_1618_2.2967_PLA2						N.nigricollis.TZA_1558_PLA2		N	L	Y	Q	F	K	N	M	I	H	C	T	V	P	S	R	P	W	W	H	F	A	D	Y	G	C	Y	C
N.haje.UGA_1903_0.0439098483642701_PLA2	45	C	E	0.046	0.216	0.235	0.548	0.533						N.nigricollis.TZA_2943_1563_1827_1602_1887_1536_1579_2304_1.7267_PLA2						N.nigricollis.TZA_2943_PLA2	L	N	L	Y	Q	F	K	N	M	I	H	C	T	V	P	S	R	P	W	W	H	F	A	D	Y	G	C	Y	C
N.haje.UGA_1903_0.0439098483642701_PLA2	46	Q	E	0.322	0.125	0.227	0.648	0.533889						N.nivea_1685_0.000355849507647815_PLA2						N.nivea_1685_PLA2		N	L	Y	Q	F	K	N	M	I	H	C	T	V	P	N	R	P	W	W	H	F	A	N	Y	G	C	Y	C
N.haje.UGA_1903_0.0439098483642701_PLA2	47	I	E	0.359	0.052	0.084	0.864	0.514444						N.nivea_1718_0.00947725791444073_PLA2						N.nivea_1718_PLA2	L	N	L	Y	Q	F	K	N	M	I	H	C	T	V	P	S	R	P	W	W	H	F	A	D	Y	G	C	Y	C
N.haje.UGA_1903_0.0439098483642701_PLA2	48	H	E	0.175	0.053	0.043	0.903	0.503778						N.pallida_1032_1581_1016_1455_2.4544_PLA2						N.pallida_1032_PLA2	L	N	L	Y	Q	F	K	N	C		H	C	T	V	P	S	R	P	W	W	H	F	A	D	Y	G	C	Y	C
N.haje.UGA_1903_0.0439098483642701_PLA2	49	D	E	0.523	0.058	0.017	0.925	0.508667						N.pallida_1069_2.31075864460376_PLA2						N.pallida_1069_PLA2		N	L	Y	Q	F	K	N	M	I	H	C	T	V	P	S	R	P	W	W	H	F	A	D	Y	G	C	Y	C
N.haje.UGA_1903_0.0439098483642701_PLA2	50	N	E	0.22	0.339	0.016	0.645	0.502778						N.pallida_1161_1153_2.1797_PLA2						N.pallida_1161_PLA2	L	N	L	Y	Q	F	K	N	M	I	H	C	T	V	P	S	R	P	W	W	H	F	A	D	Y	G	C	Y	C
N.haje.UGA_1903_0.0439098483642701_PLA2	51	C	B	0.036	0.622	0.015	0.363	0.482444						N.pallida_1175_2061_1212_2111_1269_1157_2.5120_PLA2						N.pallida_1175_PLA2	L	N	L	Y	Q	F	K	N	M	I	H	C	T	V	P	S	R	P	W	W	H	F	A	D	Y	G	C	Y	C
N.haje.UGA_1903_0.0439098483642701_PLA2	52	Y	B	0.106	0.858	0.002	0.139	0.485111						N.pallida_1179_1856_2078_1261_2.4713_PLA2						N.pallida_1179_PLA2	L	N	L	Y	Q	F	K	N	M	I	H	C	T	V	P	S	R	P	W	W	H	F	A	D	Y	G	C	Y	C
N.haje.UGA_1903_0.0439098483642701_PLA2	53	D	B	0.55	0.858	0.002	0.139	0.479						N.pallida_1603_1061_1289_1403_1058_1031_1115_1028_2.5363_PLA2						N.pallida_1603_PLA2		N	L	Y	Q	F	K	N	M	I	H	C	T	V	P	S	R	P	W	W	H	F	A	D	Y	G	C	Y	C
N.haje.UGA_1903_0.0439098483642701_PLA2	54	E	B	0.403	0.858	0.002	0.139	0.479111						N.pallida_1675_1159_1249_888_981_1186_1174_2201_1042_883_886_1714_3.7065_PLA2						N.pallida_1675_PLA2		N	L	Y	Q	F	K	N	M	I	H	C	T	V	P	S	R	P	W	W	H	F	A	D	Y	G	C	Y	C
N.haje.UGA_1903_0.0439098483642701_PLA2	55	A	B	0.043	0.782	0.003	0.216	0.477333						N.pallida_1720_0.063486821041223_PLA2						N.pallida_1720_PLA2				Y	Q	F	K	N	M	I	Q	C	T	V	P	N	R	S	W	W	D	F	A	D	Y	G	C	Y	C
N.haje.UGA_1903_0.0439098483642701_PLA2	56	G	B	0.499	0.782	0.003	0.216	0.492889						N.pallida_1913_0.00111799930196328_PLA2						N.pallida_1913_PLA2	L	N	L	Y	Q	F	K	N	M	I	Q	C	T	V	P	S	R	S	W	W	D	F	A	D	Y	G	C	Y	C
N.haje.UGA_1903_0.0439098483642701_PLA2	57	K	B	0.764	0.622	0.015	0.363	0.490111						N.pallida_2059_0.260628946185751_PLA2						N.pallida_2059_PLA2		N	L	Y	Q	F	K	N	M	I	Q	C	T	V	P	S	R	S	W	W	N	F	A	D	Y	G	C	Y	C
N.haje.UGA_1903_0.0439098483642701_PLA2	58	I	B	0.245	0.246	0.004	0.75	0.498778						N.pallida_2098_1538_1668_2073_9.3543_PLA2						N.pallida_2098_PLA2		N	L	Y	Q	F	K	N	M	I	K	C	T	V	P	S	R	S	W	L	D	F	A	N	Y	G	C	Y	C
N.haje.UGA_1903_0.0439098483642701_PLA2	59	S	E	0.65	0.016	0.005	0.979	0.507111						N.pallida_2121_0.260628946185751_PLA2						N.pallida_2121_PLA2		N	L	Y	Q	F	K	N	M	I	Q	C	T	V	P	N	R	S	W	W	D	F	A	D	Y	G	C	Y	C
N.haje.UGA_1903_0.0439098483642701_PLA2	60	G	E	0.572	0.005	0.015	0.979	0.523444
N.haje.UGA_1903_0.0439098483642701_PLA2	61	C	E	0.072	0.018	0.047	0.935	0.515
N.haje.UGA_1903_0.0439098483642701_PLA2	62	W	E	0.311	0.004	0.085	0.91	0.528667
N.haje.UGA_1903_0.0439098483642701_PLA2	63	P	E	0.365	0.004	0.197	0.799	0.523444
N.haje.UGA_1903_0.0439098483642701_PLA2	64	Y	E	0.322	0.005	0.336	0.66	0.519444
N.haje.UGA_1903_0.0439098483642701_PLA2	65	F	E	0.174	0.004	0.514	0.481	0.510889
N.haje.UGA_1903_0.0439098483642701_PLA2	66	K	E	0.358	0.004	0.42	0.576	0.504
N.haje.UGA_1903_0.0439098483642701_PLA2	67	V	B	0.38	0.004	0.616	0.381	0.481556
N.haje.UGA_1903_0.0439098483642701_PLA2	68	Y	B	0.089	0.003	0.718	0.279	0.463778
N.haje.UGA_1903_0.0439098483642701_PLA2	69	A	B	0.441	0.002	0.816	0.182	0.454667
N.haje.UGA_1903_0.0439098483642701_PLA2	70	Y	B	0.1	0.001	0.9	0.099	0.454444
N.haje.UGA_1903_0.0439098483642701_PLA2	71	E	B	0.434	0.011	0.918	0.071	0.448333
N.haje.UGA_1903_0.0439098483642701_PLA2	72	C	B	0.139	0.001	0.9	0.099	0.449111
N.haje.UGA_1903_0.0439098483642701_PLA2	73	S	B	0.585	0.002	0.816	0.182	0.438889
N.haje.UGA_1903_0.0439098483642701_PLA2	74	Q	B	0.688	0.005	0.045	0.951	0.436667
N.haje.UGA_1903_0.0439098483642701_PLA2	75	G	B	0.511	0.005	0.015	0.979	0.425222
N.haje.UGA_1903_0.0439098483642701_PLA2	76	A	B	0.561	0.004	0.514	0.481	0.440222
N.haje.UGA_1903_0.0439098483642701_PLA2	77	L	B	0.051	0.002	0.816	0.182	0.460556
N.haje.UGA_1903_0.0439098483642701_PLA2	78	S	B	0.37	0.001	0.959	0.04	0.472
N.haje.UGA_1903_0.0439098483642701_PLA2	79	C	B	0.028	0.001	0.9	0.099	0.471333
N.haje.UGA_1903_0.0439098483642701_PLA2	80	R	B	0.405	0.004	0.42	0.576	0.477111
N.haje.UGA_1903_0.0439098483642701_PLA2	81	G	B	0.697	0.005	0.045	0.951	0.479556
N.haje.UGA_1903_0.0439098483642701_PLA2	82	G	B	0.625	0.003	0.003	0.994	0.480556
N.haje.UGA_1903_0.0439098483642701_PLA2	83	K	B	0.693	0.053	0.005	0.942	0.484556
N.haje.UGA_1903_0.0439098483642701_PLA2	84	N	B	0.508	0.176	0.004	0.82	0.499889
N.haje.UGA_1903_0.0439098483642701_PLA2	85	K	B	0.416	0.782	0.003	0.216	0.484778
N.haje.UGA_1903_0.0439098483642701_PLA2	86	C	B	0.038	0.858	0.002	0.139	0.465889
N.haje.UGA_1903_0.0439098483642701_PLA2	87	A	B	0.226	0.858	0.002	0.139	0.450222
N.haje.UGA_1903_0.0439098483642701_PLA2	88	A	B	0.503	0.938	0.007	0.055	0.450889
N.haje.UGA_1903_0.0439098483642701_PLA2	89	S	B	0.266	0.938	0.007	0.055	0.418778
N.haje.UGA_1903_0.0439098483642701_PLA2	90	V	B	0.109	0.923	0.002	0.076	0.411778
N.haje.UGA_1903_0.0439098483642701_PLA2	91	C	B	0.069	0.858	0.002	0.139	0.424222
N.haje.UGA_1903_0.0439098483642701_PLA2	92	D	B	0.465	0.923	0.002	0.076	0.425667
N.haje.UGA_1903_0.0439098483642701_PLA2	93	C	B	0.038	0.858	0.002	0.139	0.413444
N.haje.UGA_1903_0.0439098483642701_PLA2	94	D	B	0.124	0.923	0.002	0.076	0.403778
N.haje.UGA_1903_0.0439098483642701_PLA2	95	R	B	0.373	0.97	0.001	0.03	0.411556
N.haje.UGA_1903_0.0439098483642701_PLA2	96	L	B	0.23	0.988	0	0.012	0.401778
N.haje.UGA_1903_0.0439098483642701_PLA2	97	A	B	0.029	0.988	0	0.012	0.380556
N.haje.UGA_1903_0.0439098483642701_PLA2	98	A	B	0.038	0.988	0	0.012	0.396556
N.haje.UGA_1903_0.0439098483642701_PLA2	99	I	B	0.277	0.97	0.001	0.03	0.413667
N.haje.UGA_1903_0.0439098483642701_PLA2	100	C	B	0.022	0.97	0.001	0.03	0.413556
N.haje.UGA_1903_0.0439098483642701_PLA2	101	F	B	0.061	0.858	0.002	0.139	0.418556
N.haje.UGA_1903_0.0439098483642701_PLA2	102	A	B	0.316	0.694	0.003	0.303	0.439111
N.haje.UGA_1903_0.0439098483642701_PLA2	103	R	B	0.551	0.502	0.002	0.495	0.467556
N.haje.UGA_1903_0.0439098483642701_PLA2	104	A	B	0.163	0.176	0.004	0.82	0.494
N.haje.UGA_1903_0.0439098483642701_PLA2	105	T	E	0.463	0.058	0.017	0.925	0.532778
N.haje.UGA_1903_0.0439098483642701_PLA2	106	Y	E	0.253	0.053	0.043	0.903	0.569778
N.haje.UGA_1903_0.0439098483642701_PLA2	107	N	E	0.213	0.018	0.019	0.964	0.593222
N.haje.UGA_1903_0.0439098483642701_PLA2	108	D	E	0.611	0.181	0.016	0.803	0.600667
N.haje.UGA_1903_0.0439098483642701_PLA2	109	N	E	0.619	0.181	0.016	0.803	0.603222
N.haje.UGA_1903_0.0439098483642701_PLA2	110	N	E	0.293	0.181	0.016	0.803	0.603
N.haje.UGA_1903_0.0439098483642701_PLA2	111	Y	E	0.325	0.113	0.043	0.844	0.613222
N.haje.UGA_1903_0.0439098483642701_PLA2	112	N	E	0.507	0.053	0.043	0.903	0.614
N.haje.UGA_1903_0.0439098483642701_PLA2	113	I	E	0.171	0.018	0.047	0.935	0.593778
N.haje.UGA_1903_0.0439098483642701_PLA2	114	D	E	0.559	0.018	0.019	0.964	0.583333
N.haje.UGA_1903_0.0439098483642701_PLA2	115	F	E	0.476	0.018	0.019	0.964	0.560556
N.haje.UGA_1903_0.0439098483642701_PLA2	116	N	E	0.547	0.018	0.019	0.964	0.550111
N.haje.UGA_1903_0.0439098483642701_PLA2	117	A	B	0.459	0.018	0.019	0.964	0.478
N.haje.UGA_1903_0.0439098483642701_PLA2	118	R	B	0.447	0.018	0.047	0.935	0.420111
N.haje.UGA_1903_0.0439098483642701_PLA2	119	C	B	0.087	0.018	0.019	0.964	0.359333
N.haje.UGA_1903_0.0439098483642701_PLA2	120	Q	B	0.731	0.003	0.003	0.994	0.293111
N.haje.UGA_1906_0.0439098483642701_PLA2	1	N	B	0.78	0.003	0.003	0.994	0.249667
N.haje.UGA_1906_0.0439098483642701_PLA2	2	L	B	0.275	0.694	0.003	0.303	0.315
N.haje.UGA_1906_0.0439098483642701_PLA2	3	Y	B	0.28	0.802	0.014	0.185	0.367889
N.haje.UGA_1906_0.0439098483642701_PLA2	4	Q	B	0.305	0.879	0.01	0.111	0.404444
N.haje.UGA_1906_0.0439098483642701_PLA2	5	F	B	0.055	0.938	0.007	0.055	0.438889
N.haje.UGA_1906_0.0439098483642701_PLA2	6	K	B	0.247	0.938	0.007	0.055	0.464222
N.haje.UGA_1906_0.0439098483642701_PLA2	7	N	B	0.398	0.938	0.007	0.055	0.461333
N.haje.UGA_1906_0.0439098483642701_PLA2	8	M	B	0.061	0.97	0.001	0.03	0.448556
N.haje.UGA_1906_0.0439098483642701_PLA2	9	I	B	0.031	0.975	0.003	0.022	0.426333
N.haje.UGA_1906_0.0439098483642701_PLA2	10	H	B	0.339	0.938	0.007	0.055	0.447889
N.haje.UGA_1906_0.0439098483642701_PLA2	11	C	B	0.185	0.879	0.01	0.111	0.439889
N.haje.UGA_1906_0.0439098483642701_PLA2	12	T	B	0.128	0.802	0.014	0.185	0.449222
N.haje.UGA_1906_0.0439098483642701_PLA2	13	V	B	0.099	0.339	0.016	0.645	0.47
N.haje.UGA_1906_0.0439098483642701_PLA2	14	P	B	0.476	0.058	0.017	0.925	0.486556
N.haje.UGA_1906_0.0439098483642701_PLA2	15	N	B	0.501	0.018	0.019	0.964	0.486111
N.haje.UGA_1906_0.0439098483642701_PLA2	16	R	B	0.232	0.018	0.019	0.964	0.493333
N.haje.UGA_1906_0.0439098483642701_PLA2	17	P	B	0.111	0.058	0.017	0.925	0.496111
N.haje.UGA_1906_0.0439098483642701_PLA2	18	W	E	0.11	0.339	0.016	0.645	0.515778
N.haje.UGA_1906_0.0439098483642701_PLA2	19	W	E	0.198	0.354	0.048	0.598	0.510222
N.haje.UGA_1906_0.0439098483642701_PLA2	20	H	E	0.226	0.386	0.097	0.517	0.504222
N.haje.UGA_1906_0.0439098483642701_PLA2	21	F	B	0.073	0.428	0.171	0.402	0.490667
N.haje.UGA_1906_0.0439098483642701_PLA2	22	A	B	0.293	0.386	0.097	0.517	0.476444
N.haje.UGA_1906_0.0439098483642701_PLA2	23	N	B	0.399	0.191	0.086	0.723	0.476778
N.haje.UGA_1906_0.0439098483642701_PLA2	24	Y	B	0.054	0.052	0.084	0.864	0.46
N.haje.UGA_1906_0.0439098483642701_PLA2	25	G	B	0.048	0.019	0.141	0.84	0.452333
N.haje.UGA_1906_0.0439098483642701_PLA2	26	C	B	0.028	0.021	0.279	0.699	0.466556
N.haje.UGA_1906_0.0439098483642701_PLA2	27	Y	B	0.08	0.021	0.451	0.528	0.472889
N.haje.UGA_1906_0.0439098483642701_PLA2	28	C	B	0.022	0.021	0.279	0.699	0.477111
N.haje.UGA_1906_0.0439098483642701_PLA2	29	G	E	0.11	0.019	0.141	0.84	0.507
N.haje.UGA_1906_0.0439098483642701_PLA2	30	R	E	0.362	0.018	0.088	0.893	0.530778
N.haje.UGA_1906_0.0439098483642701_PLA2	31	G	E	0.305	0.005	0.015	0.979	0.556556
N.haje.UGA_1906_0.0439098483642701_PLA2	32	G	E	0.29	0.005	0.015	0.979	0.564556
N.haje.UGA_1906_0.0439098483642701_PLA2	33	K	E	0.58	0.018	0.047	0.935	0.578667
N.haje.UGA_1906_0.0439098483642701_PLA2	34	G	E	0.449	0.018	0.047	0.935	0.604556
N.haje.UGA_1906_0.0439098483642701_PLA2	35	T	E	0.43	0.018	0.047	0.935	0.613556
N.haje.UGA_1906_0.0439098483642701_PLA2	36	P	E	0.239	0.018	0.047	0.935	0.605444
N.haje.UGA_1906_0.0439098483642701_PLA2	37	V	E	0.328	0.052	0.084	0.864	0.603
N.haje.UGA_1906_0.0439098483642701_PLA2	38	D	E	0.428	0.018	0.088	0.893	0.578556
N.haje.UGA_1906_0.0439098483642701_PLA2	39	D	E	0.515	0.052	0.084	0.864	0.553333
N.haje.UGA_1906_0.0439098483642701_PLA2	40	L	E	0.299	0.113	0.043	0.844	0.530222
N.haje.UGA_1906_0.0439098483642701_PLA2	41	D	E	0.302	0.184	0.043	0.773	0.524889
N.haje.UGA_1906_0.0439098483642701_PLA2	42	R	E	0.34	0.354	0.048	0.598	0.526222
N.haje.UGA_1906_0.0439098483642701_PLA2	43	C	E	0.031	0.561	0.047	0.393	0.505556
N.haje.UGA_1906_0.0439098483642701_PLA2	44	C	B	0.038	0.605	0.105	0.29	0.489111
N.haje.UGA_1906_0.0439098483642701_PLA2	45	Q	B	0.378	0.605	0.105	0.29	0.490222
N.haje.UGA_1906_0.0439098483642701_PLA2	46	I	B	0.374	0.354	0.048	0.598	0.470778									W.aegyptia_2227_0.00707907316161679_PLA2	LNIYQFKNMIQCTVPSRSWWDFADYGCYCGRGGSGTPVDDLDRCCQVHDNCYNQAQEITGCRPKWKTYTYECSQGTLTCKGRNNACAATVCDCDRLAAICFAGAPYNDNNYNIDLKARCQ
N.haje.UGA_1906_0.0439098483642701_PLA2	47	H	B	0.124	0.257	0.016	0.727	0.470556									W.aegyptia_2235_0.0114155398074315_PLA2	NLYQFKNMIQCTVPNRSWWHFANYGCYCGRGGSGTPVDDLDRCCQIHDNCYGEAEKISGCWPYIKTYTYESCQGTLTSCGANNKCAASVCDCDRVAANCFARATYNDKNYNIDFNARCQ
N.haje.UGA_1906_0.0439098483642701_PLA2	48	D	B	0.537	0.181	0.016	0.803	0.483
N.haje.UGA_1906_0.0439098483642701_PLA2	49	K	B	0.283	0.522	0.016	0.462	0.487667
N.haje.UGA_1906_0.0439098483642701_PLA2	50	C	B	0.03	0.717	0.014	0.269	0.475889
N.haje.UGA_1906_0.0439098483642701_PLA2	51	Y	B	0.113	0.923	0.002	0.076	0.482444
N.haje.UGA_1906_0.0439098483642701_PLA2	52	D	B	0.584	0.923	0.002	0.076	0.480556
N.haje.UGA_1906_0.0439098483642701_PLA2	53	E	B	0.345	0.923	0.002	0.076	0.485556
N.haje.UGA_1906_0.0439098483642701_PLA2	54	A	B	0.033	0.923	0.002	0.076	0.487778
N.haje.UGA_1906_0.0439098483642701_PLA2	55	E	E	0.476	0.858	0.002	0.139	0.507333
N.haje.UGA_1906_0.0439098483642701_PLA2	56	K	E	0.719	0.717	0.014	0.269	0.503222
N.haje.UGA_1906_0.0439098483642701_PLA2	57	I	E	0.227	0.246	0.004	0.75	0.509778
N.haje.UGA_1906_0.0439098483642701_PLA2	58	S	E	0.622	0.016	0.005	0.979	0.517667
N.haje.UGA_1906_0.0439098483642701_PLA2	59	G	E	0.416	0.018	0.019	0.964	0.534667
N.haje.UGA_1906_0.0439098483642701_PLA2	60	C	E	0.055	0.018	0.047	0.935	0.522444
N.haje.UGA_1906_0.0439098483642701_PLA2	61	W	E	0.293	0.018	0.088	0.893	0.534889
N.haje.UGA_1906_0.0439098483642701_PLA2	62	P	E	0.326	0.005	0.262	0.733	0.525444
N.haje.UGA_1906_0.0439098483642701_PLA2	63	Y	E	0.309	0.005	0.336	0.66	0.509667
N.haje.UGA_1906_0.0439098483642701_PLA2	64	I	B	0.158	0.004	0.514	0.481	0.496111
N.haje.UGA_1906_0.0439098483642701_PLA2	65	K	B	0.327	0.004	0.42	0.576	0.487444
N.haje.UGA_1906_0.0439098483642701_PLA2	66	T	B	0.356	0.004	0.616	0.381	0.469556
N.haje.UGA_1906_0.0439098483642701_PLA2	67	Y	B	0.064	0.003	0.718	0.279	0.457556
N.haje.UGA_1906_0.0439098483642701_PLA2	68	T	B	0.381	0.002	0.816	0.182	0.454556
N.haje.UGA_1906_0.0439098483642701_PLA2	69	Y	B	0.092	0.001	0.9	0.099	0.455111
N.haje.UGA_1906_0.0439098483642701_PLA2	70	E	B	0.443	0.011	0.918	0.071	0.446778
N.haje.UGA_1906_0.0439098483642701_PLA2	71	S	B	0.157	0.001	0.9	0.099	0.448667
N.haje.UGA_1906_0.0439098483642701_PLA2	72	C	B	0.512	0.003	0.718	0.279	0.448556
N.haje.UGA_1906_0.0439098483642701_PLA2	73	Q	B	0.73	0.005	0.045	0.951	0.448333
N.haje.UGA_1906_0.0439098483642701_PLA2	74	G	B	0.526	0.005	0.045	0.951	0.435444
N.haje.UGA_1906_0.0439098483642701_PLA2	75	T	B	0.561	0.004	0.514	0.481	0.441778
N.haje.UGA_1906_0.0439098483642701_PLA2	76	L	B	0.066	0.002	0.816	0.182	0.447444
N.haje.UGA_1906_0.0439098483642701_PLA2	77	T	B	0.447	0.001	0.9	0.099	0.449333
N.haje.UGA_1906_0.0439098483642701_PLA2	78	C	B	0.039	0.002	0.816	0.182	0.454667
N.haje.UGA_1906_0.0439098483642701_PLA2	79	K	B	0.502	0.005	0.262	0.733	0.459222
N.haje.UGA_1906_0.0439098483642701_PLA2	80	D	B	0.67	0.005	0.045	0.951	0.454556
N.haje.UGA_1906_0.0439098483642701_PLA2	81	G	B	0.619	0.109	0.005	0.886	0.462111
N.haje.UGA_1906_0.0439098483642701_PLA2	82	G	B	0.555	0.246	0.004	0.75	0.458778
N.haje.UGA_1906_0.0439098483642701_PLA2	83	K	B	0.406	0.858	0.002	0.139	0.469444
N.haje.UGA_1906_0.0439098483642701_PLA2	84	C	B	0.036	0.858	0.002	0.139	0.450222
N.haje.UGA_1906_0.0439098483642701_PLA2	85	A	B	0.222	0.923	0.002	0.076	0.443556
N.haje.UGA_1906_0.0439098483642701_PLA2	86	A	B	0.49	0.923	0.002	0.076	0.440556
N.haje.UGA_1906_0.0439098483642701_PLA2	87	S	B	0.219	0.97	0.001	0.03	0.410889
N.haje.UGA_1906_0.0439098483642701_PLA2	88	V	B	0.08	0.97	0.001	0.03	0.398333
N.haje.UGA_1906_0.0439098483642701_PLA2	89	C	B	0.069	0.923	0.002	0.076	0.407889
N.haje.UGA_1906_0.0439098483642701_PLA2	90	D	B	0.438	0.923	0.002	0.076	0.409778
N.haje.UGA_1906_0.0439098483642701_PLA2	91	C	B	0.034	0.923	0.002	0.076	0.400222
N.haje.UGA_1906_0.0439098483642701_PLA2	92	D	B	0.118	0.923	0.002	0.076	0.392222
N.haje.UGA_1906_0.0439098483642701_PLA2	93	R	B	0.371	0.97	0.001	0.03	0.404
N.haje.UGA_1906_0.0439098483642701_PLA2	94	V	B	0.246	0.988	0	0.012	0.393667
N.haje.UGA_1906_0.0439098483642701_PLA2	95	A	B	0.03	0.988	0	0.012	0.376667
N.haje.UGA_1906_0.0439098483642701_PLA2	96	A	B	0.039	0.988	0	0.012	0.395
N.haje.UGA_1906_0.0439098483642701_PLA2	97	N	B	0.294	0.97	0.001	0.03	0.416
N.haje.UGA_1906_0.0439098483642701_PLA2	98	C	B	0.022	0.97	0.001	0.03	0.413667
N.haje.UGA_1906_0.0439098483642701_PLA2	99	F	B	0.062	0.858	0.002	0.139	0.419333
N.haje.UGA_1906_0.0439098483642701_PLA2	100	A	B	0.284	0.694	0.003	0.303	0.440556
N.haje.UGA_1906_0.0439098483642701_PLA2	101	R	B	0.537	0.502	0.002	0.495	0.469111
N.haje.UGA_1906_0.0439098483642701_PLA2	102	A	B	0.14	0.109	0.005	0.886	0.496778
N.haje.UGA_1906_0.0439098483642701_PLA2	103	T	E	0.46	0.058	0.017	0.925	0.536444
N.haje.UGA_1906_0.0439098483642701_PLA2	104	Y	E	0.227	0.018	0.047	0.935	0.562222
N.haje.UGA_1906_0.0439098483642701_PLA2	105	N	E	0.256	0.018	0.019	0.964	0.583444
N.haje.UGA_1906_0.0439098483642701_PLA2	106	D	E	0.613	0.181	0.016	0.803	0.584889
N.haje.UGA_1906_0.0439098483642701_PLA2	107	K	E	0.619	0.181	0.016	0.803	0.591889
N.haje.UGA_1906_0.0439098483642701_PLA2	108	N	E	0.252	0.181	0.016	0.803	0.593
N.haje.UGA_1906_0.0439098483642701_PLA2	109	Y	E	0.313	0.184	0.043	0.773	0.602333
N.haje.UGA_1906_0.0439098483642701_PLA2	110	N	E	0.497	0.053	0.043	0.903	0.604889
N.haje.UGA_1906_0.0439098483642701_PLA2	111	I	E	0.176	0.053	0.043	0.903	0.588
N.haje.UGA_1906_0.0439098483642701_PLA2	112	D	E	0.489	0.018	0.019	0.964	0.577
N.haje.UGA_1906_0.0439098483642701_PLA2	113	F	E	0.486	0.018	0.019	0.964	0.560889
N.haje.UGA_1906_0.0439098483642701_PLA2	114	N	E	0.594	0.018	0.019	0.964	0.551556
N.haje.UGA_1906_0.0439098483642701_PLA2	115	A	B	0.481	0.018	0.019	0.964	0.481333
N.haje.UGA_1906_0.0439098483642701_PLA2	116	R	B	0.468	0.018	0.019	0.964	0.419333
N.haje.UGA_1906_0.0439098483642701_PLA2	117	C	B	0.091	0.018	0.019	0.964	0.359
N.haje.UGA_1906_0.0439098483642701_PLA2	118	Q	B	0.745	0.003	0.003	0.994	0.293444
N.melanoleuca_1875_1710_1608_7.7707_PLA2	1	N	B	0.775	0.003	0.003	0.994	0.252
N.melanoleuca_1875_1710_1608_7.7707_PLA2	2	L	B	0.28	0.717	0.014	0.269	0.320222
N.melanoleuca_1875_1710_1608_7.7707_PLA2	3	Y	B	0.281	0.802	0.014	0.185	0.372889
N.melanoleuca_1875_1710_1608_7.7707_PLA2	4	Q	B	0.321	0.879	0.01	0.111	0.411333
N.melanoleuca_1875_1710_1608_7.7707_PLA2	5	F	B	0.06	0.938	0.007	0.055	0.446889
N.melanoleuca_1875_1710_1608_7.7707_PLA2	6	K	B	0.27	0.938	0.007	0.055	0.472667
N.melanoleuca_1875_1710_1608_7.7707_PLA2	7	N	B	0.395	0.938	0.007	0.055	0.471333
N.melanoleuca_1875_1710_1608_7.7707_PLA2	8	M	B	0.058	0.938	0.007	0.055	0.458667
N.melanoleuca_1875_1710_1608_7.7707_PLA2	9	I	B	0.037	0.938	0.007	0.055	0.440111
N.melanoleuca_1875_1710_1608_7.7707_PLA2	10	Q	B	0.331	0.879	0.01	0.111	0.459333
N.melanoleuca_1875_1710_1608_7.7707_PLA2	11	C	B	0.174	0.802	0.014	0.185	0.449333
N.melanoleuca_1875_1710_1608_7.7707_PLA2	12	T	B	0.121	0.751	0.05	0.199	0.463444
N.melanoleuca_1875_1710_1608_7.7707_PLA2	13	V	B	0.098	0.354	0.048	0.598	0.484889
N.melanoleuca_1875_1710_1608_7.7707_PLA2	14	P	B	0.404	0.058	0.017	0.925	0.499889
N.melanoleuca_1875_1710_1608_7.7707_PLA2	15	N	E	0.617	0.018	0.019	0.964	0.5
N.melanoleuca_1875_1710_1608_7.7707_PLA2	16	R	E	0.297	0.018	0.019	0.964	0.507333
N.melanoleuca_1875_1710_1608_7.7707_PLA2	17	S	E	0.114	0.016	0.005	0.979	0.516222
N.melanoleuca_1875_1710_1608_7.7707_PLA2	18	W	E	0.092	0.339	0.016	0.645	0.536556
N.melanoleuca_1875_1710_1608_7.7707_PLA2	19	W	E	0.238	0.354	0.048	0.598	0.531556
N.melanoleuca_1875_1710_1608_7.7707_PLA2	20	H	E	0.272	0.386	0.097	0.517	0.526444
N.melanoleuca_1875_1710_1608_7.7707_PLA2	21	F	E	0.092	0.386	0.097	0.517	0.509333
N.melanoleuca_1875_1710_1608_7.7707_PLA2	22	A	B	0.332	0.278	0.093	0.628	0.492889
N.melanoleuca_1875_1710_1608_7.7707_PLA2	23	N	B	0.405	0.191	0.086	0.723	0.495
N.melanoleuca_1875_1710_1608_7.7707_PLA2	24	Y	B	0.057	0.052	0.084	0.864	0.477444
N.melanoleuca_1875_1710_1608_7.7707_PLA2	25	G	B	0.047	0.019	0.141	0.84	0.465222
N.melanoleuca_1875_1710_1608_7.7707_PLA2	26	C	B	0.027	0.022	0.359	0.619	0.471556
N.melanoleuca_1875_1710_1608_7.7707_PLA2	27	Y	B	0.088	0.021	0.451	0.528	0.476556
N.melanoleuca_1875_1710_1608_7.7707_PLA2	28	C	B	0.02	0.022	0.359	0.619	0.474667
N.melanoleuca_1875_1710_1608_7.7707_PLA2	29	G	B	0.092	0.02	0.205	0.775	0.497222
N.melanoleuca_1875_1710_1608_7.7707_PLA2	30	R	E	0.31	0.019	0.141	0.84	0.526333
N.melanoleuca_1875_1710_1608_7.7707_PLA2	31	G	E	0.358	0.005	0.045	0.951	0.556778
N.melanoleuca_1875_1710_1608_7.7707_PLA2	32	G	E	0.254	0.005	0.045	0.951	0.565111
N.melanoleuca_1875_1710_1608_7.7707_PLA2	33	S	E	0.565	0.018	0.088	0.893	0.581778
N.melanoleuca_1875_1710_1608_7.7707_PLA2	34	G	E	0.453	0.018	0.047	0.935	0.610444
N.melanoleuca_1875_1710_1608_7.7707_PLA2	35	T	E	0.436	0.018	0.047	0.935	0.620778
N.melanoleuca_1875_1710_1608_7.7707_PLA2	36	P	E	0.272	0.018	0.047	0.935	0.613778										>sp|P07037|PA2A2_ASPSC_Acidic_phospholipase_A2_CM-II_OS_Aspidelaps_scutatus_OX_8607_PE_1_SV_1
N.melanoleuca_1875_1710_1608_7.7707_PLA2	37	V	E	0.401	0.053	0.043	0.903	0.617222
N.melanoleuca_1875_1710_1608_7.7707_PLA2	38	D	E	0.447	0.018	0.047	0.935	0.598667
N.melanoleuca_1875_1710_1608_7.7707_PLA2	39	D	E	0.549	0.053	0.043	0.903	0.568889
N.melanoleuca_1875_1710_1608_7.7707_PLA2	40	L	E	0.334	0.053	0.043	0.903	0.541889
N.melanoleuca_1875_1710_1608_7.7707_PLA2	41	D	E	0.331	0.113	0.043	0.844	0.537556
N.melanoleuca_1875_1710_1608_7.7707_PLA2	42	R	E	0.339	0.278	0.093	0.628	0.538444
N.melanoleuca_1875_1710_1608_7.7707_PLA2	43	C	E	0.029	0.428	0.171	0.402	0.521
N.melanoleuca_1875_1710_1608_7.7707_PLA2	44	C	E	0.059	0.428	0.171	0.402	0.504
N.melanoleuca_1875_1710_1608_7.7707_PLA2	45	Q	E	0.408	0.428	0.171	0.402	0.5
N.melanoleuca_1875_1710_1608_7.7707_PLA2	46	I	B	0.437	0.191	0.086	0.723	0.478222
N.melanoleuca_1875_1710_1608_7.7707_PLA2	47	H	B	0.167	0.113	0.043	0.844	0.473111
N.melanoleuca_1875_1710_1608_7.7707_PLA2	48	D	B	0.595	0.058	0.017	0.925	0.471444
N.melanoleuca_1875_1710_1608_7.7707_PLA2	49	N	B	0.282	0.257	0.016	0.727	0.469667
N.melanoleuca_1875_1710_1608_7.7707_PLA2	50	C	B	0.047	0.522	0.016	0.462	0.452444
N.melanoleuca_1875_1710_1608_7.7707_PLA2	51	Y	B	0.116	0.802	0.014	0.185	0.458222
N.melanoleuca_1875_1710_1608_7.7707_PLA2	52	G	B	0.544	0.802	0.014	0.185	0.454111
N.melanoleuca_1875_1710_1608_7.7707_PLA2	53	E	B	0.428	0.782	0.003	0.216	0.455889
N.melanoleuca_1875_1710_1608_7.7707_PLA2	54	A	B	0.055	0.782	0.003	0.216	0.458444
N.melanoleuca_1875_1710_1608_7.7707_PLA2	55	E	B	0.506	0.694	0.003	0.303	0.478889
N.melanoleuca_1875_1710_1608_7.7707_PLA2	56	K	B	0.745	0.522	0.016	0.462	0.478222
N.melanoleuca_1875_1710_1608_7.7707_PLA2	57	I	B	0.216	0.181	0.016	0.803	0.498778
N.melanoleuca_1875_1710_1608_7.7707_PLA2	58	S	E	0.664	0.016	0.005	0.979	0.510778
N.melanoleuca_1875_1710_1608_7.7707_PLA2	59	G	E	0.497	0.005	0.015	0.979	0.532222
N.melanoleuca_1875_1710_1608_7.7707_PLA2	60	C	E	0.035	0.018	0.047	0.935	0.520444
N.melanoleuca_1875_1710_1608_7.7707_PLA2	61	W	E	0.306	0.018	0.088	0.893	0.531333
N.melanoleuca_1875_1710_1608_7.7707_PLA2	62	P	E	0.316	0.02	0.205	0.775	0.527111
N.melanoleuca_1875_1710_1608_7.7707_PLA2	63	Y	E	0.379	0.005	0.262	0.733	0.515
N.melanoleuca_1875_1710_1608_7.7707_PLA2	64	I	E	0.186	0.004	0.42	0.576	0.5
N.melanoleuca_1875_1710_1608_7.7707_PLA2	65	K	B	0.355	0.005	0.336	0.66	0.496444
N.melanoleuca_1875_1710_1608_7.7707_PLA2	66	T	B	0.364	0.004	0.514	0.481	0.476111
N.melanoleuca_1875_1710_1608_7.7707_PLA2	67	Y	B	0.099	0.004	0.616	0.381	0.464111
N.melanoleuca_1875_1710_1608_7.7707_PLA2	68	T	B	0.409	0.003	0.718	0.279	0.464444
N.melanoleuca_1875_1710_1608_7.7707_PLA2	69	Y	B	0.103	0.002	0.816	0.182	0.470556
N.melanoleuca_1875_1710_1608_7.7707_PLA2	70	E	B	0.405	0.001	0.9	0.099	0.464
N.melanoleuca_1875_1710_1608_7.7707_PLA2	71	S	B	0.135	0.001	0.959	0.04	0.468333
N.melanoleuca_1875_1710_1608_7.7707_PLA2	72	C	B	0.435	0.002	0.816	0.182	0.48
N.melanoleuca_1875_1710_1608_7.7707_PLA2	73	Q	B	0.687	0.004	0.138	0.858	0.489111
N.melanoleuca_1875_1710_1608_7.7707_PLA2	74	G	B	0.699	0.005	0.015	0.979	0.492
N.melanoleuca_1875_1710_1608_7.7707_PLA2	75	T	E	0.607	0.004	0.42	0.576	0.504111
N.melanoleuca_1875_1710_1608_7.7707_PLA2	76	L	E	0.185	0.003	0.718	0.279	0.524333
N.melanoleuca_1875_1710_1608_7.7707_PLA2	77	T	E	0.381	0.003	0.718	0.279	0.522222
N.melanoleuca_1875_1710_1608_7.7707_PLA2	78	S	E	0.238	0.004	0.616	0.381	0.522333
N.melanoleuca_1875_1710_1608_7.7707_PLA2	79	C	E	0.323	0.005	0.262	0.733	0.522556
N.melanoleuca_1875_1710_1608_7.7707_PLA2	80	G	E	0.702	0.005	0.045	0.951	0.522
N.melanoleuca_1875_1710_1608_7.7707_PLA2	81	A	E	0.677	0.003	0.003	0.994	0.509111
N.melanoleuca_1875_1710_1608_7.7707_PLA2	82	N	E	0.588	0.053	0.005	0.942	0.508889
N.melanoleuca_1875_1710_1608_7.7707_PLA2	83	N	E	0.547	0.246	0.004	0.75	0.505556
N.melanoleuca_1875_1710_1608_7.7707_PLA2	84	K	B	0.401	0.782	0.003	0.216	0.490667
N.melanoleuca_1875_1710_1608_7.7707_PLA2	85	C	B	0.034	0.858	0.002	0.139	0.471667
N.melanoleuca_1875_1710_1608_7.7707_PLA2	86	A	B	0.249	0.858	0.002	0.139	0.459889
N.melanoleuca_1875_1710_1608_7.7707_PLA2	87	A	B	0.515	0.923	0.002	0.076	0.453667
N.melanoleuca_1875_1710_1608_7.7707_PLA2	88	S	B	0.256	0.923	0.002	0.076	0.427333
N.melanoleuca_1875_1710_1608_7.7707_PLA2	89	V	B	0.135	0.858	0.002	0.139	0.422222
N.melanoleuca_1875_1710_1608_7.7707_PLA2	90	C	B	0.068	0.782	0.003	0.216	0.438889
N.melanoleuca_1875_1710_1608_7.7707_PLA2	91	D	B	0.493	0.782	0.003	0.216	0.441
N.melanoleuca_1875_1710_1608_7.7707_PLA2	92	C	B	0.05	0.694	0.003	0.303	0.431111
N.melanoleuca_1875_1710_1608_7.7707_PLA2	93	D	B	0.165	0.694	0.003	0.303	0.421556
N.melanoleuca_1875_1710_1608_7.7707_PLA2	94	R	B	0.393	0.97	0.001	0.03	0.423111
N.melanoleuca_1875_1710_1608_7.7707_PLA2	95	V	B	0.329	0.97	0.001	0.03	0.413111
N.melanoleuca_1875_1710_1608_7.7707_PLA2	96	A	B	0.038	0.988	0	0.012	0.400778
N.melanoleuca_1875_1710_1608_7.7707_PLA2	97	A	B	0.047	0.97	0.001	0.03	0.421111
N.melanoleuca_1875_1710_1608_7.7707_PLA2	98	N	B	0.327	0.97	0.001	0.03	0.439222
N.melanoleuca_1875_1710_1608_7.7707_PLA2	99	C	B	0.025	0.923	0.002	0.076	0.433
N.melanoleuca_1875_1710_1608_7.7707_PLA2	100	F	B	0.062	0.858	0.002	0.139	0.438778
N.melanoleuca_1875_1710_1608_7.7707_PLA2	101	A	B	0.312	0.694	0.003	0.303	0.457889
N.melanoleuca_1875_1710_1608_7.7707_PLA2	102	R	B	0.548	0.406	0.004	0.59	0.484778
N.melanoleuca_1875_1710_1608_7.7707_PLA2	103	A	E	0.145	0.109	0.005	0.886	0.511444
N.melanoleuca_1875_1710_1608_7.7707_PLA2	104	T	E	0.457	0.058	0.017	0.925	0.546667
N.melanoleuca_1875_1710_1608_7.7707_PLA2	105	Y	E	0.247	0.018	0.047	0.935	0.568444
N.melanoleuca_1875_1710_1608_7.7707_PLA2	106	N	E	0.222	0.018	0.019	0.964	0.582556
N.melanoleuca_1875_1710_1608_7.7707_PLA2	107	D	E	0.591	0.184	0.043	0.773	0.582
N.melanoleuca_1875_1710_1608_7.7707_PLA2	108	K	E	0.611	0.257	0.016	0.727	0.588444
N.melanoleuca_1875_1710_1608_7.7707_PLA2	109	N	E	0.246	0.181	0.016	0.803	0.585
N.melanoleuca_1875_1710_1608_7.7707_PLA2	110	Y	E	0.287	0.184	0.043	0.773	0.594222
N.melanoleuca_1875_1710_1608_7.7707_PLA2	111	N	E	0.495	0.053	0.043	0.903	0.596333
N.melanoleuca_1875_1710_1608_7.7707_PLA2	112	I	E	0.173	0.053	0.043	0.903	0.579556
N.melanoleuca_1875_1710_1608_7.7707_PLA2	113	D	E	0.484	0.018	0.019	0.964	0.571
N.melanoleuca_1875_1710_1608_7.7707_PLA2	114	F	E	0.498	0.018	0.019	0.964	0.555444
N.melanoleuca_1875_1710_1608_7.7707_PLA2	115	N	E	0.601	0.018	0.019	0.964	0.549444
N.melanoleuca_1875_1710_1608_7.7707_PLA2	116	A	B	0.475	0.018	0.019	0.964	0.480333
N.melanoleuca_1875_1710_1608_7.7707_PLA2	117	R	B	0.458	0.018	0.019	0.964	0.418556
N.melanoleuca_1875_1710_1608_7.7707_PLA2	118	C	B	0.092	0.018	0.019	0.964	0.359
N.melanoleuca_1875_1710_1608_7.7707_PLA2	119	Q	B	0.742	0.003	0.003	0.994	0.293222
N.melanoleuca_1933_1786_1808_2025_2511_1820_1826_2497_7.3519_PLA2	1	N	B	0.787	0.003	0.003	0.994	0.251556
N.melanoleuca_1933_1786_1808_2025_2511_1820_1826_2497_7.3519_PLA2	2	L	B	0.285	0.694	0.003	0.303	0.318556
N.melanoleuca_1933_1786_1808_2025_2511_1820_1826_2497_7.3519_PLA2	3	Y	B	0.283	0.802	0.014	0.185	0.369778
N.melanoleuca_1933_1786_1808_2025_2511_1820_1826_2497_7.3519_PLA2	4	Q	B	0.316	0.802	0.014	0.185	0.404222
N.melanoleuca_1933_1786_1808_2025_2511_1820_1826_2497_7.3519_PLA2	5	F	B	0.058	0.938	0.007	0.055	0.439333
N.melanoleuca_1933_1786_1808_2025_2511_1820_1826_2497_7.3519_PLA2	6	K	B	0.274	0.938	0.007	0.055	0.464667
N.melanoleuca_1933_1786_1808_2025_2511_1820_1826_2497_7.3519_PLA2	7	N	B	0.4	0.938	0.007	0.055	0.459889
N.melanoleuca_1933_1786_1808_2025_2511_1820_1826_2497_7.3519_PLA2	8	M	B	0.048	0.938	0.007	0.055	0.443222
N.melanoleuca_1933_1786_1808_2025_2511_1820_1826_2497_7.3519_PLA2	9	I	B	0.035	0.938	0.007	0.055	0.424556
N.melanoleuca_1933_1786_1808_2025_2511_1820_1826_2497_7.3519_PLA2	10	H	B	0.351	0.879	0.01	0.111	0.445444
N.melanoleuca_1933_1786_1808_2025_2511_1820_1826_2497_7.3519_PLA2	11	C	B	0.175	0.879	0.01	0.111	0.438
N.melanoleuca_1933_1786_1808_2025_2511_1820_1826_2497_7.3519_PLA2	12	T	B	0.117	0.751	0.05	0.199	0.453444
N.melanoleuca_1933_1786_1808_2025_2511_1820_1826_2497_7.3519_PLA2	13	V	B	0.097	0.268	0.043	0.689	0.477889
N.melanoleuca_1933_1786_1808_2025_2511_1820_1826_2497_7.3519_PLA2	14	P	B	0.407	0.058	0.017	0.925	0.494
N.melanoleuca_1933_1786_1808_2025_2511_1820_1826_2497_7.3519_PLA2	15	N	B	0.631	0.018	0.019	0.964	0.495778
N.melanoleuca_1933_1786_1808_2025_2511_1820_1826_2497_7.3519_PLA2	16	R	E	0.296	0.018	0.019	0.964	0.510889
N.melanoleuca_1933_1786_1808_2025_2511_1820_1826_2497_7.3519_PLA2	17	S	E	0.127	0.016	0.005	0.979	0.525889
N.melanoleuca_1933_1786_1808_2025_2511_1820_1826_2497_7.3519_PLA2	18	W	E	0.091	0.257	0.016	0.727	0.547667
N.melanoleuca_1933_1786_1808_2025_2511_1820_1826_2497_7.3519_PLA2	19	W	E	0.224	0.268	0.043	0.689	0.541778
N.melanoleuca_1933_1786_1808_2025_2511_1820_1826_2497_7.3519_PLA2	20	H	E	0.314	0.278	0.093	0.628	0.535333
N.melanoleuca_1933_1786_1808_2025_2511_1820_1826_2497_7.3519_PLA2	21	F	E	0.097	0.307	0.165	0.527	0.518333
N.melanoleuca_1933_1786_1808_2025_2511_1820_1826_2497_7.3519_PLA2	22	A	E	0.333	0.199	0.152	0.649	0.502556
N.melanoleuca_1933_1786_1808_2025_2511_1820_1826_2497_7.3519_PLA2	23	N	E	0.367	0.118	0.15	0.732	0.503444
N.melanoleuca_1933_1786_1808_2025_2511_1820_1826_2497_7.3519_PLA2	24	Y	B	0.057	0.056	0.142	0.802	0.484556
N.melanoleuca_1933_1786_1808_2025_2511_1820_1826_2497_7.3519_PLA2	25	G	B	0.044	0.02	0.205	0.775	0.467222
N.melanoleuca_1933_1786_1808_2025_2511_1820_1826_2497_7.3519_PLA2	26	C	B	0.028	0.022	0.359	0.619	0.473556
N.melanoleuca_1933_1786_1808_2025_2511_1820_1826_2497_7.3519_PLA2	27	Y	B	0.077	0.021	0.451	0.528	0.480444
N.melanoleuca_1933_1786_1808_2025_2511_1820_1826_2497_7.3519_PLA2	28	C	B	0.021	0.022	0.359	0.619	0.482333
N.melanoleuca_1933_1786_1808_2025_2511_1820_1826_2497_7.3519_PLA2	29	G	E	0.086	0.02	0.205	0.775	0.509
N.melanoleuca_1933_1786_1808_2025_2511_1820_1826_2497_7.3519_PLA2	30	R	E	0.333	0.018	0.088	0.893	0.539556
N.melanoleuca_1933_1786_1808_2025_2511_1820_1826_2497_7.3519_PLA2	31	G	E	0.401	0.018	0.047	0.935	0.571333
N.melanoleuca_1933_1786_1808_2025_2511_1820_1826_2497_7.3519_PLA2	32	G	E	0.303	0.018	0.019	0.964	0.584111
N.melanoleuca_1933_1786_1808_2025_2511_1820_1826_2497_7.3519_PLA2	33	S	E	0.562	0.018	0.047	0.935	0.601222
N.melanoleuca_1933_1786_1808_2025_2511_1820_1826_2497_7.3519_PLA2	34	G	E	0.477	0.018	0.019	0.964	0.63
N.melanoleuca_1933_1786_1808_2025_2511_1820_1826_2497_7.3519_PLA2	35	T	E	0.45	0.018	0.019	0.964	0.639667
N.melanoleuca_1933_1786_1808_2025_2511_1820_1826_2497_7.3519_PLA2	36	P	E	0.3	0.018	0.047	0.935	0.626222
N.melanoleuca_1933_1786_1808_2025_2511_1820_1826_2497_7.3519_PLA2	37	V	E	0.396	0.053	0.043	0.903	0.626333
N.melanoleuca_1933_1786_1808_2025_2511_1820_1826_2497_7.3519_PLA2	38	D	E	0.468	0.018	0.019	0.964	0.603
N.melanoleuca_1933_1786_1808_2025_2511_1820_1826_2497_7.3519_PLA2	39	D	E	0.53	0.058	0.017	0.925	0.571667
N.melanoleuca_1933_1786_1808_2025_2511_1820_1826_2497_7.3519_PLA2	40	L	E	0.29	0.115	0.016	0.868	0.545444
N.melanoleuca_1933_1786_1808_2025_2511_1820_1826_2497_7.3519_PLA2	41	D	E	0.399	0.115	0.016	0.868	0.537444
N.melanoleuca_1933_1786_1808_2025_2511_1820_1826_2497_7.3519_PLA2	42	R	E	0.33	0.268	0.043	0.689	0.537111
N.melanoleuca_1933_1786_1808_2025_2511_1820_1826_2497_7.3519_PLA2	43	C	E	0.025	0.502	0.102	0.396	0.521889
N.melanoleuca_1933_1786_1808_2025_2511_1820_1826_2497_7.3519_PLA2	44	C	E	0.055	0.538	0.173	0.289	0.507
N.melanoleuca_1933_1786_1808_2025_2511_1820_1826_2497_7.3519_PLA2	45	Q	E	0.425	0.502	0.102	0.396	0.507333
N.melanoleuca_1933_1786_1808_2025_2511_1820_1826_2497_7.3519_PLA2	46	I	B	0.404	0.278	0.093	0.628	0.489444
N.melanoleuca_1933_1786_1808_2025_2511_1820_1826_2497_7.3519_PLA2	47	H	B	0.148	0.113	0.043	0.844	0.483
N.melanoleuca_1933_1786_1808_2025_2511_1820_1826_2497_7.3519_PLA2	48	D	B	0.55	0.058	0.017	0.925	0.484556
N.melanoleuca_1933_1786_1808_2025_2511_1820_1826_2497_7.3519_PLA2	49	N	B	0.251	0.257	0.016	0.727	0.484333
N.melanoleuca_1933_1786_1808_2025_2511_1820_1826_2497_7.3519_PLA2	50	C	B	0.051	0.43	0.016	0.555	0.468889
N.melanoleuca_1933_1786_1808_2025_2511_1820_1826_2497_7.3519_PLA2	51	Y	B	0.12	0.717	0.014	0.269	0.477778
N.melanoleuca_1933_1786_1808_2025_2511_1820_1826_2497_7.3519_PLA2	52	G	B	0.534	0.802	0.014	0.185	0.472778
N.melanoleuca_1933_1786_1808_2025_2511_1820_1826_2497_7.3519_PLA2	53	E	B	0.442	0.802	0.014	0.185	0.473333
N.melanoleuca_1933_1786_1808_2025_2511_1820_1826_2497_7.3519_PLA2	54	A	B	0.061	0.694	0.003	0.303	0.479667
N.melanoleuca_1933_1786_1808_2025_2511_1820_1826_2497_7.3519_PLA2	55	E	B	0.519	0.717	0.014	0.269	0.496444
N.melanoleuca_1933_1786_1808_2025_2511_1820_1826_2497_7.3519_PLA2	56	K	B	0.709	0.522	0.016	0.462	0.498778
N.melanoleuca_1933_1786_1808_2025_2511_1820_1826_2497_7.3519_PLA2	57	I	E	0.232	0.257	0.016	0.727	0.515333
N.melanoleuca_1933_1786_1808_2025_2511_1820_1826_2497_7.3519_PLA2	58	S	E	0.624	0.053	0.005	0.942	0.523222
N.melanoleuca_1933_1786_1808_2025_2511_1820_1826_2497_7.3519_PLA2	59	G	E	0.521	0.018	0.019	0.964	0.543222
N.melanoleuca_1933_1786_1808_2025_2511_1820_1826_2497_7.3519_PLA2	60	C	E	0.056	0.018	0.047	0.935	0.530667
N.melanoleuca_1933_1786_1808_2025_2511_1820_1826_2497_7.3519_PLA2	61	W	E	0.325	0.018	0.088	0.893	0.539222
N.melanoleuca_1933_1786_1808_2025_2511_1820_1826_2497_7.3519_PLA2	62	P	E	0.349	0.005	0.262	0.733	0.529778
N.melanoleuca_1933_1786_1808_2025_2511_1820_1826_2497_7.3519_PLA2	63	Y	E	0.383	0.004	0.42	0.576	0.515667
N.melanoleuca_1933_1786_1808_2025_2511_1820_1826_2497_7.3519_PLA2	64	I	E	0.203	0.004	0.616	0.381	0.500667
N.melanoleuca_1933_1786_1808_2025_2511_1820_1826_2497_7.3519_PLA2	65	K	B	0.371	0.004	0.514	0.481	0.499444
N.melanoleuca_1933_1786_1808_2025_2511_1820_1826_2497_7.3519_PLA2	66	T	B	0.375	0.004	0.616	0.381	0.479556
N.melanoleuca_1933_1786_1808_2025_2511_1820_1826_2497_7.3519_PLA2	67	Y	B	0.095	0.003	0.718	0.279	0.468667
N.melanoleuca_1933_1786_1808_2025_2511_1820_1826_2497_7.3519_PLA2	68	T	B	0.403	0.002	0.816	0.182	0.468111
N.melanoleuca_1933_1786_1808_2025_2511_1820_1826_2497_7.3519_PLA2	69	Y	B	0.094	0.001	0.9	0.099	0.47
N.melanoleuca_1933_1786_1808_2025_2511_1820_1826_2497_7.3519_PLA2	70	D	B	0.386	0.011	0.918	0.071	0.465889
N.melanoleuca_1933_1786_1808_2025_2511_1820_1826_2497_7.3519_PLA2	71	S	B	0.131	0.001	0.9	0.099	0.473111
N.melanoleuca_1933_1786_1808_2025_2511_1820_1826_2497_7.3519_PLA2	72	C	B	0.418	0.004	0.616	0.381	0.481556
N.melanoleuca_1933_1786_1808_2025_2511_1820_1826_2497_7.3519_PLA2	73	Q	B	0.696	0.004	0.085	0.91	0.492111
N.melanoleuca_1933_1786_1808_2025_2511_1820_1826_2497_7.3519_PLA2	74	G	B	0.754	0.003	0.003	0.994	0.489111
N.melanoleuca_1933_1786_1808_2025_2511_1820_1826_2497_7.3519_PLA2	75	T	B	0.58	0.004	0.138	0.858	0.496778
N.melanoleuca_1933_1786_1808_2025_2511_1820_1826_2497_7.3519_PLA2	76	L	E	0.183	0.004	0.616	0.381	0.517222
N.melanoleuca_1933_1786_1808_2025_2511_1820_1826_2497_7.3519_PLA2	77	T	E	0.276	0.002	0.816	0.182	0.517778
N.melanoleuca_1933_1786_1808_2025_2511_1820_1826_2497_7.3519_PLA2	78	S	E	0.266	0.003	0.718	0.279	0.518222
N.melanoleuca_1933_1786_1808_2025_2511_1820_1826_2497_7.3519_PLA2	79	C	E	0.235	0.004	0.42	0.576	0.517444
N.melanoleuca_1933_1786_1808_2025_2511_1820_1826_2497_7.3519_PLA2	80	G	E	0.65	0.005	0.045	0.951	0.517778
N.melanoleuca_1933_1786_1808_2025_2511_1820_1826_2497_7.3519_PLA2	81	A	E	0.708	0.003	0.003	0.994	0.501333
N.melanoleuca_1933_1786_1808_2025_2511_1820_1826_2497_7.3519_PLA2	82	A	B	0.65	0.016	0.005	0.979	0.494556
N.melanoleuca_1933_1786_1808_2025_2511_1820_1826_2497_7.3519_PLA2	83	N	B	0.497	0.109	0.005	0.886	0.495333
N.melanoleuca_1933_1786_1808_2025_2511_1820_1826_2497_7.3519_PLA2	84	N	B	0.427	0.782	0.003	0.216	0.486889
N.melanoleuca_1933_1786_1808_2025_2511_1820_1826_2497_7.3519_PLA2	85	C	B	0.036	0.782	0.003	0.216	0.469333
N.melanoleuca_1933_1786_1808_2025_2511_1820_1826_2497_7.3519_PLA2	86	A	B	0.276	0.858	0.002	0.139	0.455667
N.melanoleuca_1933_1786_1808_2025_2511_1820_1826_2497_7.3519_PLA2	87	A	B	0.523	0.879	0.01	0.111	0.451333
N.melanoleuca_1933_1786_1808_2025_2511_1820_1826_2497_7.3519_PLA2	88	S	B	0.289	0.879	0.01	0.111	0.426778
N.melanoleuca_1933_1786_1808_2025_2511_1820_1826_2497_7.3519_PLA2	89	V	B	0.152	0.802	0.014	0.185	0.424222
N.melanoleuca_1933_1786_1808_2025_2511_1820_1826_2497_7.3519_PLA2	90	C	B	0.076	0.717	0.014	0.269	0.442222
N.melanoleuca_1933_1786_1808_2025_2511_1820_1826_2497_7.3519_PLA2	91	D	B	0.527	0.782	0.003	0.216	0.448667
N.melanoleuca_1933_1786_1808_2025_2511_1820_1826_2497_7.3519_PLA2	92	C	B	0.059	0.6	0.003	0.397	0.436
N.melanoleuca_1933_1786_1808_2025_2511_1820_1826_2497_7.3519_PLA2	93	D	B	0.191	0.694	0.003	0.303	0.424778
N.melanoleuca_1933_1786_1808_2025_2511_1820_1826_2497_7.3519_PLA2	94	R	B	0.388	0.97	0.001	0.03	0.423
N.melanoleuca_1933_1786_1808_2025_2511_1820_1826_2497_7.3519_PLA2	95	V	B	0.315	0.97	0.001	0.03	0.410667
N.melanoleuca_1933_1786_1808_2025_2511_1820_1826_2497_7.3519_PLA2	96	A	B	0.037	0.988	0	0.012	0.398
N.melanoleuca_1933_1786_1808_2025_2511_1820_1826_2497_7.3519_PLA2	97	A	B	0.043	0.97	0.001	0.03	0.412889
N.melanoleuca_1933_1786_1808_2025_2511_1820_1826_2497_7.3519_PLA2	98	N	B	0.315	0.97	0.001	0.03	0.424333
N.melanoleuca_1933_1786_1808_2025_2511_1820_1826_2497_7.3519_PLA2	99	C	B	0.024	0.923	0.002	0.076	0.421
N.melanoleuca_1933_1786_1808_2025_2511_1820_1826_2497_7.3519_PLA2	100	F	B	0.058	0.858	0.002	0.139	0.427556
N.melanoleuca_1933_1786_1808_2025_2511_1820_1826_2497_7.3519_PLA2	101	A	B	0.325	0.694	0.003	0.303	0.455222
N.melanoleuca_1933_1786_1808_2025_2511_1820_1826_2497_7.3519_PLA2	102	R	B	0.588	0.502	0.002	0.495	0.480667
N.melanoleuca_1933_1786_1808_2025_2511_1820_1826_2497_7.3519_PLA2	103	A	E	0.14	0.109	0.005	0.886	0.503222
N.melanoleuca_1933_1786_1808_2025_2511_1820_1826_2497_7.3519_PLA2	104	P	E	0.512	0.058	0.017	0.925	0.540444
N.melanoleuca_1933_1786_1808_2025_2511_1820_1826_2497_7.3519_PLA2	105	Y	E	0.218	0.018	0.047	0.935	0.559222
N.melanoleuca_1933_1786_1808_2025_2511_1820_1826_2497_7.3519_PLA2	106	I	E	0.245	0.053	0.043	0.903	0.573333
N.melanoleuca_1933_1786_1808_2025_2511_1820_1826_2497_7.3519_PLA2	107	D	E	0.481	0.181	0.016	0.803	0.577333
N.melanoleuca_1933_1786_1808_2025_2511_1820_1826_2497_7.3519_PLA2	108	K	E	0.639	0.257	0.016	0.727	0.583333
N.melanoleuca_1933_1786_1808_2025_2511_1820_1826_2497_7.3519_PLA2	109	N	E	0.365	0.257	0.016	0.727	0.577444
N.melanoleuca_1933_1786_1808_2025_2511_1820_1826_2497_7.3519_PLA2	110	Y	E	0.195	0.181	0.016	0.803	0.579667
N.melanoleuca_1933_1786_1808_2025_2511_1820_1826_2497_7.3519_PLA2	111	N	E	0.496	0.113	0.043	0.844	0.580667
N.melanoleuca_1933_1786_1808_2025_2511_1820_1826_2497_7.3519_PLA2	112	I	E	0.188	0.053	0.043	0.903	0.568222
N.melanoleuca_1933_1786_1808_2025_2511_1820_1826_2497_7.3519_PLA2	113	D	E	0.375	0.018	0.019	0.964	0.558778
N.melanoleuca_1933_1786_1808_2025_2511_1820_1826_2497_7.3519_PLA2	114	F	E	0.52	0.016	0.005	0.979	0.546556
N.melanoleuca_1933_1786_1808_2025_2511_1820_1826_2497_7.3519_PLA2	115	N	E	0.597	0.058	0.017	0.925	0.545
N.melanoleuca_1933_1786_1808_2025_2511_1820_1826_2497_7.3519_PLA2	116	A	B	0.446	0.018	0.019	0.964	0.475333
N.melanoleuca_1933_1786_1808_2025_2511_1820_1826_2497_7.3519_PLA2	117	R	B	0.423	0.058	0.017	0.925	0.413111
N.melanoleuca_1933_1786_1808_2025_2511_1820_1826_2497_7.3519_PLA2	118	C	B	0.075	0.018	0.019	0.964	0.354778
N.melanoleuca_1933_1786_1808_2025_2511_1820_1826_2497_7.3519_PLA2	119	Q	B	0.722	0.003	0.003	0.994	0.288667
N.melanoleuca_2641_1713_1779_2166_1748_2417_1706_2264_2895_2976_2.0218_PLA2	1	L	B	0.487	0.003	0.003	0.994	0.259778
N.melanoleuca_2641_1713_1779_2166_1748_2417_1706_2264_2895_2976_2.0218_PLA2	2	N	B	0.346	0.113	0.043	0.844	0.303667
N.melanoleuca_2641_1713_1779_2166_1748_2417_1706_2264_2895_2976_2.0218_PLA2	3	L	B	0.217	0.879	0.01	0.111	0.370333
N.melanoleuca_2641_1713_1779_2166_1748_2417_1706_2264_2895_2976_2.0218_PLA2	4	Y	B	0.246	0.879	0.01	0.111	0.422778
N.melanoleuca_2641_1713_1779_2166_1748_2417_1706_2264_2895_2976_2.0218_PLA2	5	Q	B	0.257	0.879	0.01	0.111	0.460667
N.melanoleuca_2641_1713_1779_2166_1748_2417_1706_2264_2895_2976_2.0218_PLA2	6	F	B	0.06	0.938	0.007	0.055	0.462
N.melanoleuca_2641_1713_1779_2166_1748_2417_1706_2264_2895_2976_2.0218_PLA2	7	K	B	0.242	0.923	0.002	0.076	0.479222
N.melanoleuca_2641_1713_1779_2166_1748_2417_1706_2264_2895_2976_2.0218_PLA2	8	N	B	0.342	0.923	0.002	0.076	0.472667
N.melanoleuca_2641_1713_1779_2166_1748_2417_1706_2264_2895_2976_2.0218_PLA2	9	M	B	0.053	0.923	0.002	0.076	0.464667
N.melanoleuca_2641_1713_1779_2166_1748_2417_1706_2264_2895_2976_2.0218_PLA2	10	I	B	0.037	0.938	0.007	0.055	0.437
N.melanoleuca_2641_1713_1779_2166_1748_2417_1706_2264_2895_2976_2.0218_PLA2	11	Q	B	0.337	0.938	0.007	0.055	0.462
N.melanoleuca_2641_1713_1779_2166_1748_2417_1706_2264_2895_2976_2.0218_PLA2	12	C	B	0.171	0.879	0.01	0.111	0.456889
N.melanoleuca_2641_1713_1779_2166_1748_2417_1706_2264_2895_2976_2.0218_PLA2	13	T	B	0.153	0.717	0.014	0.269	0.471
N.melanoleuca_2641_1713_1779_2166_1748_2417_1706_2264_2895_2976_2.0218_PLA2	14	V	B	0.101	0.339	0.016	0.645	0.491778
N.melanoleuca_2641_1713_1779_2166_1748_2417_1706_2264_2895_2976_2.0218_PLA2	15	P	E	0.387	0.115	0.016	0.868	0.508
N.melanoleuca_2641_1713_1779_2166_1748_2417_1706_2264_2895_2976_2.0218_PLA2	16	N	E	0.645	0.018	0.019	0.964	0.509667
N.melanoleuca_2641_1713_1779_2166_1748_2417_1706_2264_2895_2976_2.0218_PLA2	17	R	E	0.278	0.018	0.019	0.964	0.520556
N.melanoleuca_2641_1713_1779_2166_1748_2417_1706_2264_2895_2976_2.0218_PLA2	18	S	E	0.138	0.016	0.005	0.979	0.524
N.melanoleuca_2641_1713_1779_2166_1748_2417_1706_2264_2895_2976_2.0218_PLA2	19	W	E	0.121	0.184	0.043	0.773	0.54
N.melanoleuca_2641_1713_1779_2166_1748_2417_1706_2264_2895_2976_2.0218_PLA2	20	W	E	0.265	0.191	0.086	0.723	0.530556
N.melanoleuca_2641_1713_1779_2166_1748_2417_1706_2264_2895_2976_2.0218_PLA2	21	H	E	0.302	0.199	0.152	0.649	0.522667
N.melanoleuca_2641_1713_1779_2166_1748_2417_1706_2264_2895_2976_2.0218_PLA2	22	F	E	0.078	0.216	0.235	0.548	0.507111
N.melanoleuca_2641_1713_1779_2166_1748_2417_1706_2264_2895_2976_2.0218_PLA2	23	A	B	0.237	0.125	0.227	0.648	0.491333
N.melanoleuca_2641_1713_1779_2166_1748_2417_1706_2264_2895_2976_2.0218_PLA2	24	D	B	0.226	0.064	0.216	0.721	0.491667
N.melanoleuca_2641_1713_1779_2166_1748_2417_1706_2264_2895_2976_2.0218_PLA2	25	Y	B	0.047	0.064	0.216	0.721	0.472889
N.melanoleuca_2641_1713_1779_2166_1748_2417_1706_2264_2895_2976_2.0218_PLA2	26	G	B	0.03	0.02	0.205	0.775	0.456778
N.melanoleuca_2641_1713_1779_2166_1748_2417_1706_2264_2895_2976_2.0218_PLA2	27	C	B	0.029	0.022	0.359	0.619	0.465556
N.melanoleuca_2641_1713_1779_2166_1748_2417_1706_2264_2895_2976_2.0218_PLA2	28	Y	B	0.072	0.069	0.386	0.545	0.472
N.melanoleuca_2641_1713_1779_2166_1748_2417_1706_2264_2895_2976_2.0218_PLA2	29	C	B	0.03	0.064	0.216	0.721	0.470556
N.melanoleuca_2641_1713_1779_2166_1748_2417_1706_2264_2895_2976_2.0218_PLA2	30	G	B	0.087	0.019	0.141	0.84	0.494222
N.melanoleuca_2641_1713_1779_2166_1748_2417_1706_2264_2895_2976_2.0218_PLA2	31	R	E	0.307	0.018	0.047	0.935	0.519444
N.melanoleuca_2641_1713_1779_2166_1748_2417_1706_2264_2895_2976_2.0218_PLA2	32	G	E	0.302	0.018	0.019	0.964	0.552111
N.melanoleuca_2641_1713_1779_2166_1748_2417_1706_2264_2895_2976_2.0218_PLA2	33	G	E	0.259	0.018	0.047	0.935	0.566667
N.melanoleuca_2641_1713_1779_2166_1748_2417_1706_2264_2895_2976_2.0218_PLA2	34	S	E	0.56	0.018	0.088	0.893	0.583778
N.melanoleuca_2641_1713_1779_2166_1748_2417_1706_2264_2895_2976_2.0218_PLA2	35	G	E	0.377	0.018	0.047	0.935	0.611
N.melanoleuca_2641_1713_1779_2166_1748_2417_1706_2264_2895_2976_2.0218_PLA2	36	T	E	0.446	0.005	0.045	0.951	0.623667
N.melanoleuca_2641_1713_1779_2166_1748_2417_1706_2264_2895_2976_2.0218_PLA2	37	P	E	0.389	0.018	0.047	0.935	0.619222
N.melanoleuca_2641_1713_1779_2166_1748_2417_1706_2264_2895_2976_2.0218_PLA2	38	V	E	0.476	0.018	0.047	0.935	0.620889
N.melanoleuca_2641_1713_1779_2166_1748_2417_1706_2264_2895_2976_2.0218_PLA2	39	D	E	0.338	0.018	0.088	0.893	0.607111
N.melanoleuca_2641_1713_1779_2166_1748_2417_1706_2264_2895_2976_2.0218_PLA2	40	D	E	0.536	0.052	0.084	0.864	0.582333
N.melanoleuca_2641_1713_1779_2166_1748_2417_1706_2264_2895_2976_2.0218_PLA2	41	L	E	0.335	0.052	0.084	0.864	0.563889
N.melanoleuca_2641_1713_1779_2166_1748_2417_1706_2264_2895_2976_2.0218_PLA2	42	D	E	0.269	0.052	0.084	0.864	0.559556
N.melanoleuca_2641_1713_1779_2166_1748_2417_1706_2264_2895_2976_2.0218_PLA2	43	R	E	0.294	0.113	0.087	0.8	0.561111
N.melanoleuca_2641_1713_1779_2166_1748_2417_1706_2264_2895_2976_2.0218_PLA2	44	C	E	0.042	0.199	0.152	0.649	0.550778
N.melanoleuca_2641_1713_1779_2166_1748_2417_1706_2264_2895_2976_2.0218_PLA2	45	C	E	0.058	0.125	0.227	0.648	0.533778
N.melanoleuca_2641_1713_1779_2166_1748_2417_1706_2264_2895_2976_2.0218_PLA2	46	Q	E	0.353	0.125	0.227	0.648	0.531667
N.melanoleuca_2641_1713_1779_2166_1748_2417_1706_2264_2895_2976_2.0218_PLA2	47	I	E	0.417	0.052	0.084	0.864	0.518444
N.melanoleuca_2641_1713_1779_2166_1748_2417_1706_2264_2895_2976_2.0218_PLA2	48	H	E	0.197	0.018	0.047	0.935	0.504111
N.melanoleuca_2641_1713_1779_2166_1748_2417_1706_2264_2895_2976_2.0218_PLA2	49	D	E	0.518	0.058	0.017	0.925	0.504778
N.melanoleuca_2641_1713_1779_2166_1748_2417_1706_2264_2895_2976_2.0218_PLA2	50	N	B	0.181	0.181	0.016	0.803	0.494889
N.melanoleuca_2641_1713_1779_2166_1748_2417_1706_2264_2895_2976_2.0218_PLA2	51	C	B	0.037	0.43	0.016	0.555	0.473222
N.melanoleuca_2641_1713_1779_2166_1748_2417_1706_2264_2895_2976_2.0218_PLA2	52	Y	B	0.112	0.802	0.014	0.185	0.476333
N.melanoleuca_2641_1713_1779_2166_1748_2417_1706_2264_2895_2976_2.0218_PLA2	53	G	B	0.531	0.802	0.014	0.185	0.468
N.melanoleuca_2641_1713_1779_2166_1748_2417_1706_2264_2895_2976_2.0218_PLA2	54	E	B	0.433	0.802	0.014	0.185	0.466889
N.melanoleuca_2641_1713_1779_2166_1748_2417_1706_2264_2895_2976_2.0218_PLA2	55	A	B	0.053	0.694	0.003	0.303	0.466667
N.melanoleuca_2641_1713_1779_2166_1748_2417_1706_2264_2895_2976_2.0218_PLA2	56	E	B	0.535	0.622	0.015	0.363	0.480667
N.melanoleuca_2641_1713_1779_2166_1748_2417_1706_2264_2895_2976_2.0218_PLA2	57	K	B	0.748	0.522	0.016	0.462	0.482889
N.melanoleuca_2641_1713_1779_2166_1748_2417_1706_2264_2895_2976_2.0218_PLA2	58	I	B	0.218	0.181	0.016	0.803	0.497333
N.melanoleuca_2641_1713_1779_2166_1748_2417_1706_2264_2895_2976_2.0218_PLA2	59	S	E	0.653	0.016	0.005	0.979	0.507222
N.melanoleuca_2641_1713_1779_2166_1748_2417_1706_2264_2895_2976_2.0218_PLA2	60	G	E	0.504	0.018	0.019	0.964	0.526111
N.melanoleuca_2641_1713_1779_2166_1748_2417_1706_2264_2895_2976_2.0218_PLA2	61	C	E	0.071	0.018	0.047	0.935	0.516778
N.melanoleuca_2641_1713_1779_2166_1748_2417_1706_2264_2895_2976_2.0218_PLA2	62	W	E	0.311	0.018	0.088	0.893	0.528
N.melanoleuca_2641_1713_1779_2166_1748_2417_1706_2264_2895_2976_2.0218_PLA2	63	P	E	0.365	0.004	0.197	0.799	0.522667
N.melanoleuca_2641_1713_1779_2166_1748_2417_1706_2264_2895_2976_2.0218_PLA2	64	Y	E	0.333	0.005	0.336	0.66	0.509556
N.melanoleuca_2641_1713_1779_2166_1748_2417_1706_2264_2895_2976_2.0218_PLA2	65	I	B	0.185	0.004	0.514	0.481	0.499778
N.melanoleuca_2641_1713_1779_2166_1748_2417_1706_2264_2895_2976_2.0218_PLA2	66	K	B	0.397	0.004	0.42	0.576	0.489333
N.melanoleuca_2641_1713_1779_2166_1748_2417_1706_2264_2895_2976_2.0218_PLA2	67	T	B	0.415	0.004	0.514	0.481	0.464889
N.melanoleuca_2641_1713_1779_2166_1748_2417_1706_2264_2895_2976_2.0218_PLA2	68	Y	B	0.086	0.004	0.616	0.381	0.449111
N.melanoleuca_2641_1713_1779_2166_1748_2417_1706_2264_2895_2976_2.0218_PLA2	69	T	B	0.467	0.002	0.816	0.182	0.440333
N.melanoleuca_2641_1713_1779_2166_1748_2417_1706_2264_2895_2976_2.0218_PLA2	70	Y	B	0.091	0.001	0.9	0.099	0.435778
N.melanoleuca_2641_1713_1779_2166_1748_2417_1706_2264_2895_2976_2.0218_PLA2	71	E	B	0.427	0.011	0.918	0.071	0.428333
N.melanoleuca_2641_1713_1779_2166_1748_2417_1706_2264_2895_2976_2.0218_PLA2	72	C	B	0.137	0.001	0.9	0.099	0.422778
N.melanoleuca_2641_1713_1779_2166_1748_2417_1706_2264_2895_2976_2.0218_PLA2	73	S	B	0.566	0.002	0.816	0.182	0.416444
N.melanoleuca_2641_1713_1779_2166_1748_2417_1706_2264_2895_2976_2.0218_PLA2	74	Q	B	0.726	0.005	0.045	0.951	0.415
N.melanoleuca_2641_1713_1779_2166_1748_2417_1706_2264_2895_2976_2.0218_PLA2	75	G	B	0.449	0.005	0.015	0.979	0.402778
N.melanoleuca_2641_1713_1779_2166_1748_2417_1706_2264_2895_2976_2.0218_PLA2	76	T	B	0.543	0.004	0.616	0.381	0.412444
N.melanoleuca_2641_1713_1779_2166_1748_2417_1706_2264_2895_2976_2.0218_PLA2	77	L	B	0.057	0.001	0.9	0.099	0.426778
N.melanoleuca_2641_1713_1779_2166_1748_2417_1706_2264_2895_2976_2.0218_PLA2	78	T	B	0.37	0.001	0.959	0.04	0.441
N.melanoleuca_2641_1713_1779_2166_1748_2417_1706_2264_2895_2976_2.0218_PLA2	79	C	B	0.028	0.001	0.9	0.099	0.45
N.melanoleuca_2641_1713_1779_2166_1748_2417_1706_2264_2895_2976_2.0218_PLA2	80	S	B	0.449	0.005	0.336	0.66	0.452889
N.melanoleuca_2641_1713_1779_2166_1748_2417_1706_2264_2895_2976_2.0218_PLA2	81	G	B	0.623	0.005	0.045	0.951	0.463889
N.melanoleuca_2641_1713_1779_2166_1748_2417_1706_2264_2895_2976_2.0218_PLA2	82	A	B	0.699	0.003	0.003	0.994	0.468444
N.melanoleuca_2641_1713_1779_2166_1748_2417_1706_2264_2895_2976_2.0218_PLA2	83	N	B	0.665	0.016	0.005	0.979	0.474667
N.melanoleuca_2641_1713_1779_2166_1748_2417_1706_2264_2895_2976_2.0218_PLA2	84	D	B	0.517	0.246	0.004	0.75	0.492889
N.melanoleuca_2641_1713_1779_2166_1748_2417_1706_2264_2895_2976_2.0218_PLA2	85	K	B	0.431	0.782	0.003	0.216	0.484444
N.melanoleuca_2641_1713_1779_2166_1748_2417_1706_2264_2895_2976_2.0218_PLA2	86	C	B	0.039	0.858	0.002	0.139	0.472778
N.melanoleuca_2641_1713_1779_2166_1748_2417_1706_2264_2895_2976_2.0218_PLA2	87	A	B	0.23	0.858	0.002	0.139	0.454111
N.melanoleuca_2641_1713_1779_2166_1748_2417_1706_2264_2895_2976_2.0218_PLA2	88	A	B	0.503	0.938	0.007	0.055	0.449444
N.melanoleuca_2641_1713_1779_2166_1748_2417_1706_2264_2895_2976_2.0218_PLA2	89	S	B	0.252	0.923	0.002	0.076	0.420778
N.melanoleuca_2641_1713_1779_2166_1748_2417_1706_2264_2895_2976_2.0218_PLA2	90	V	B	0.105	0.923	0.002	0.076	0.413222
N.melanoleuca_2641_1713_1779_2166_1748_2417_1706_2264_2895_2976_2.0218_PLA2	91	C	B	0.073	0.858	0.002	0.139	0.427111
N.melanoleuca_2641_1713_1779_2166_1748_2417_1706_2264_2895_2976_2.0218_PLA2	92	D	B	0.47	0.923	0.002	0.076	0.426556
N.melanoleuca_2641_1713_1779_2166_1748_2417_1706_2264_2895_2976_2.0218_PLA2	93	C	B	0.039	0.858	0.002	0.139	0.414889
N.melanoleuca_2641_1713_1779_2166_1748_2417_1706_2264_2895_2976_2.0218_PLA2	94	D	B	0.128	0.923	0.002	0.076	0.406333
N.melanoleuca_2641_1713_1779_2166_1748_2417_1706_2264_2895_2976_2.0218_PLA2	95	R	B	0.384	0.988	0	0.012	0.410556
N.melanoleuca_2641_1713_1779_2166_1748_2417_1706_2264_2895_2976_2.0218_PLA2	96	V	B	0.243	0.988	0	0.012	0.399556
N.melanoleuca_2641_1713_1779_2166_1748_2417_1706_2264_2895_2976_2.0218_PLA2	97	A	B	0.029	0.988	0	0.012	0.385556
N.melanoleuca_2641_1713_1779_2166_1748_2417_1706_2264_2895_2976_2.0218_PLA2	98	A	B	0.041	0.988	0	0.012	0.403778
N.melanoleuca_2641_1713_1779_2166_1748_2417_1706_2264_2895_2976_2.0218_PLA2	99	N	B	0.296	0.97	0.001	0.03	0.420444
N.melanoleuca_2641_1713_1779_2166_1748_2417_1706_2264_2895_2976_2.0218_PLA2	100	C	B	0.022	0.97	0.001	0.03	0.419333
N.melanoleuca_2641_1713_1779_2166_1748_2417_1706_2264_2895_2976_2.0218_PLA2	101	F	B	0.067	0.923	0.002	0.076	0.428222
N.melanoleuca_2641_1713_1779_2166_1748_2417_1706_2264_2895_2976_2.0218_PLA2	102	A	B	0.338	0.694	0.003	0.303	0.455889
N.melanoleuca_2641_1713_1779_2166_1748_2417_1706_2264_2895_2976_2.0218_PLA2	103	R	B	0.602	0.502	0.002	0.495	0.479667
N.melanoleuca_2641_1713_1779_2166_1748_2417_1706_2264_2895_2976_2.0218_PLA2	104	A	E	0.131	0.109	0.005	0.886	0.501556
N.melanoleuca_2641_1713_1779_2166_1748_2417_1706_2264_2895_2976_2.0218_PLA2	105	P	E	0.537	0.058	0.017	0.925	0.539111
N.melanoleuca_2641_1713_1779_2166_1748_2417_1706_2264_2895_2976_2.0218_PLA2	106	Y	E	0.226	0.018	0.047	0.935	0.557778
N.melanoleuca_2641_1713_1779_2166_1748_2417_1706_2264_2895_2976_2.0218_PLA2	107	I	E	0.237	0.053	0.043	0.903	0.570333
N.melanoleuca_2641_1713_1779_2166_1748_2417_1706_2264_2895_2976_2.0218_PLA2	108	D	E	0.516	0.268	0.043	0.689	0.574111
N.melanoleuca_2641_1713_1779_2166_1748_2417_1706_2264_2895_2976_2.0218_PLA2	109	K	E	0.633	0.339	0.016	0.645	0.580333
N.melanoleuca_2641_1713_1779_2166_1748_2417_1706_2264_2895_2976_2.0218_PLA2	110	N	E	0.351	0.257	0.016	0.727	0.575111
N.melanoleuca_2641_1713_1779_2166_1748_2417_1706_2264_2895_2976_2.0218_PLA2	111	Y	E	0.196	0.257	0.016	0.727	0.578889
N.melanoleuca_2641_1713_1779_2166_1748_2417_1706_2264_2895_2976_2.0218_PLA2	112	N	E	0.508	0.113	0.043	0.844	0.582889
N.melanoleuca_2641_1713_1779_2166_1748_2417_1706_2264_2895_2976_2.0218_PLA2	113	I	E	0.185	0.053	0.043	0.903	0.57
N.melanoleuca_2641_1713_1779_2166_1748_2417_1706_2264_2895_2976_2.0218_PLA2	114	D	E	0.389	0.018	0.019	0.964	0.559778
N.melanoleuca_2641_1713_1779_2166_1748_2417_1706_2264_2895_2976_2.0218_PLA2	115	F	E	0.507	0.016	0.005	0.979	0.547
N.melanoleuca_2641_1713_1779_2166_1748_2417_1706_2264_2895_2976_2.0218_PLA2	116	N	E	0.594	0.053	0.005	0.942	0.545222
N.melanoleuca_2641_1713_1779_2166_1748_2417_1706_2264_2895_2976_2.0218_PLA2	117	A	B	0.47	0.058	0.017	0.925	0.475556
N.melanoleuca_2641_1713_1779_2166_1748_2417_1706_2264_2895_2976_2.0218_PLA2	118	R	B	0.42	0.058	0.017	0.925	0.414
N.melanoleuca_2641_1713_1779_2166_1748_2417_1706_2264_2895_2976_2.0218_PLA2	119	C	B	0.076	0.018	0.019	0.964	0.355444
N.melanoleuca_2641_1713_1779_2166_1748_2417_1706_2264_2895_2976_2.0218_PLA2	120	Q	B	0.726	0.003	0.003	0.994	0.288667
N.melanoleuca_2841_1526_1716_0.7434_PLA2	1	N	B	0.78	0.003	0.003	0.994	0.249667
N.melanoleuca_2841_1526_1716_0.7434_PLA2	2	L	B	0.275	0.694	0.003	0.303	0.315
N.melanoleuca_2841_1526_1716_0.7434_PLA2	3	Y	B	0.28	0.802	0.014	0.185	0.367889
N.melanoleuca_2841_1526_1716_0.7434_PLA2	4	Q	B	0.305	0.879	0.01	0.111	0.404444
N.melanoleuca_2841_1526_1716_0.7434_PLA2	5	F	B	0.055	0.938	0.007	0.055	0.438889
N.melanoleuca_2841_1526_1716_0.7434_PLA2	6	K	B	0.247	0.938	0.007	0.055	0.464222
N.melanoleuca_2841_1526_1716_0.7434_PLA2	7	N	B	0.398	0.938	0.007	0.055	0.461333
N.melanoleuca_2841_1526_1716_0.7434_PLA2	8	M	B	0.061	0.97	0.001	0.03	0.448556
N.melanoleuca_2841_1526_1716_0.7434_PLA2	9	I	B	0.031	0.975	0.003	0.022	0.426333
N.melanoleuca_2841_1526_1716_0.7434_PLA2	10	H	B	0.339	0.938	0.007	0.055	0.447889
N.melanoleuca_2841_1526_1716_0.7434_PLA2	11	C	B	0.185	0.879	0.01	0.111	0.439889
N.melanoleuca_2841_1526_1716_0.7434_PLA2	12	T	B	0.128	0.802	0.014	0.185	0.449222
N.melanoleuca_2841_1526_1716_0.7434_PLA2	13	V	B	0.099	0.339	0.016	0.645	0.47
N.melanoleuca_2841_1526_1716_0.7434_PLA2	14	P	B	0.476	0.058	0.017	0.925	0.486556
N.melanoleuca_2841_1526_1716_0.7434_PLA2	15	N	B	0.501	0.018	0.019	0.964	0.486111
N.melanoleuca_2841_1526_1716_0.7434_PLA2	16	R	B	0.232	0.018	0.019	0.964	0.493333
N.melanoleuca_2841_1526_1716_0.7434_PLA2	17	P	B	0.111	0.058	0.017	0.925	0.496111
N.melanoleuca_2841_1526_1716_0.7434_PLA2	18	W	E	0.11	0.339	0.016	0.645	0.515778
N.melanoleuca_2841_1526_1716_0.7434_PLA2	19	W	E	0.198	0.354	0.048	0.598	0.510222
N.melanoleuca_2841_1526_1716_0.7434_PLA2	20	H	E	0.226	0.386	0.097	0.517	0.504222
N.melanoleuca_2841_1526_1716_0.7434_PLA2	21	F	B	0.073	0.428	0.171	0.402	0.490667
N.melanoleuca_2841_1526_1716_0.7434_PLA2	22	A	B	0.293	0.386	0.097	0.517	0.476444
N.melanoleuca_2841_1526_1716_0.7434_PLA2	23	N	B	0.399	0.191	0.086	0.723	0.476778
N.melanoleuca_2841_1526_1716_0.7434_PLA2	24	Y	B	0.054	0.052	0.084	0.864	0.46
N.melanoleuca_2841_1526_1716_0.7434_PLA2	25	G	B	0.048	0.019	0.141	0.84	0.452333
N.melanoleuca_2841_1526_1716_0.7434_PLA2	26	C	B	0.028	0.021	0.279	0.699	0.466556
N.melanoleuca_2841_1526_1716_0.7434_PLA2	27	Y	B	0.08	0.021	0.451	0.528	0.472889
N.melanoleuca_2841_1526_1716_0.7434_PLA2	28	C	B	0.022	0.021	0.279	0.699	0.477111
N.melanoleuca_2841_1526_1716_0.7434_PLA2	29	G	E	0.11	0.019	0.141	0.84	0.507
N.melanoleuca_2841_1526_1716_0.7434_PLA2	30	R	E	0.362	0.018	0.088	0.893	0.530778
N.melanoleuca_2841_1526_1716_0.7434_PLA2	31	G	E	0.305	0.005	0.015	0.979	0.556556
N.melanoleuca_2841_1526_1716_0.7434_PLA2	32	G	E	0.29	0.005	0.015	0.979	0.564556
N.melanoleuca_2841_1526_1716_0.7434_PLA2	33	K	E	0.58	0.018	0.047	0.935	0.578667
N.melanoleuca_2841_1526_1716_0.7434_PLA2	34	G	E	0.449	0.018	0.047	0.935	0.604556
N.melanoleuca_2841_1526_1716_0.7434_PLA2	35	T	E	0.43	0.018	0.047	0.935	0.613556
N.melanoleuca_2841_1526_1716_0.7434_PLA2	36	P	E	0.239	0.018	0.047	0.935	0.605444
N.melanoleuca_2841_1526_1716_0.7434_PLA2	37	V	E	0.328	0.052	0.084	0.864	0.603
N.melanoleuca_2841_1526_1716_0.7434_PLA2	38	D	E	0.428	0.018	0.088	0.893	0.578556
N.melanoleuca_2841_1526_1716_0.7434_PLA2	39	D	E	0.515	0.052	0.084	0.864	0.553333
N.melanoleuca_2841_1526_1716_0.7434_PLA2	40	L	E	0.299	0.113	0.043	0.844	0.530222
N.melanoleuca_2841_1526_1716_0.7434_PLA2	41	D	E	0.302	0.184	0.043	0.773	0.524889
N.melanoleuca_2841_1526_1716_0.7434_PLA2	42	R	E	0.34	0.354	0.048	0.598	0.526222
N.melanoleuca_2841_1526_1716_0.7434_PLA2	43	C	E	0.031	0.561	0.047	0.393	0.505556
N.melanoleuca_2841_1526_1716_0.7434_PLA2	44	C	B	0.038	0.605	0.105	0.29	0.489111
N.melanoleuca_2841_1526_1716_0.7434_PLA2	45	Q	B	0.378	0.605	0.105	0.29	0.490222
N.melanoleuca_2841_1526_1716_0.7434_PLA2	46	I	B	0.374	0.354	0.048	0.598	0.470778
N.melanoleuca_2841_1526_1716_0.7434_PLA2	47	H	B	0.124	0.257	0.016	0.727	0.470556
N.melanoleuca_2841_1526_1716_0.7434_PLA2	48	D	B	0.537	0.181	0.016	0.803	0.483
N.melanoleuca_2841_1526_1716_0.7434_PLA2	49	K	B	0.283	0.522	0.016	0.462	0.487667
N.melanoleuca_2841_1526_1716_0.7434_PLA2	50	C	B	0.03	0.717	0.014	0.269	0.475889
N.melanoleuca_2841_1526_1716_0.7434_PLA2	51	Y	B	0.113	0.923	0.002	0.076	0.482444
N.melanoleuca_2841_1526_1716_0.7434_PLA2	52	D	B	0.584	0.923	0.002	0.076	0.480556
N.melanoleuca_2841_1526_1716_0.7434_PLA2	53	E	B	0.345	0.923	0.002	0.076	0.485556
N.melanoleuca_2841_1526_1716_0.7434_PLA2	54	A	B	0.033	0.923	0.002	0.076	0.487778
N.melanoleuca_2841_1526_1716_0.7434_PLA2	55	E	E	0.476	0.858	0.002	0.139	0.507333
N.melanoleuca_2841_1526_1716_0.7434_PLA2	56	K	E	0.719	0.717	0.014	0.269	0.503222
N.melanoleuca_2841_1526_1716_0.7434_PLA2	57	I	E	0.227	0.246	0.004	0.75	0.509778
N.melanoleuca_2841_1526_1716_0.7434_PLA2	58	S	E	0.622	0.016	0.005	0.979	0.517667
N.melanoleuca_2841_1526_1716_0.7434_PLA2	59	G	E	0.416	0.018	0.019	0.964	0.534667
N.melanoleuca_2841_1526_1716_0.7434_PLA2	60	C	E	0.055	0.018	0.047	0.935	0.522444
N.melanoleuca_2841_1526_1716_0.7434_PLA2	61	W	E	0.293	0.018	0.088	0.893	0.534889
N.melanoleuca_2841_1526_1716_0.7434_PLA2	62	P	E	0.326	0.005	0.262	0.733	0.525444
N.melanoleuca_2841_1526_1716_0.7434_PLA2	63	Y	E	0.309	0.005	0.336	0.66	0.509667
N.melanoleuca_2841_1526_1716_0.7434_PLA2	64	I	B	0.158	0.004	0.514	0.481	0.496111
N.melanoleuca_2841_1526_1716_0.7434_PLA2	65	K	B	0.327	0.004	0.42	0.576	0.487444
N.melanoleuca_2841_1526_1716_0.7434_PLA2	66	T	B	0.356	0.004	0.616	0.381	0.469556
N.melanoleuca_2841_1526_1716_0.7434_PLA2	67	Y	B	0.064	0.003	0.718	0.279	0.457556
N.melanoleuca_2841_1526_1716_0.7434_PLA2	68	T	B	0.381	0.002	0.816	0.182	0.454556
N.melanoleuca_2841_1526_1716_0.7434_PLA2	69	Y	B	0.092	0.001	0.9	0.099	0.455111
N.melanoleuca_2841_1526_1716_0.7434_PLA2	70	E	B	0.443	0.011	0.918	0.071	0.446778
N.melanoleuca_2841_1526_1716_0.7434_PLA2	71	S	B	0.157	0.001	0.9	0.099	0.448667
N.melanoleuca_2841_1526_1716_0.7434_PLA2	72	C	B	0.512	0.003	0.718	0.279	0.448556
N.melanoleuca_2841_1526_1716_0.7434_PLA2	73	Q	B	0.73	0.005	0.045	0.951	0.448333
N.melanoleuca_2841_1526_1716_0.7434_PLA2	74	G	B	0.526	0.005	0.045	0.951	0.435444
N.melanoleuca_2841_1526_1716_0.7434_PLA2	75	T	B	0.561	0.004	0.514	0.481	0.441778
N.melanoleuca_2841_1526_1716_0.7434_PLA2	76	L	B	0.066	0.002	0.816	0.182	0.447444
N.melanoleuca_2841_1526_1716_0.7434_PLA2	77	T	B	0.447	0.001	0.9	0.099	0.449333
N.melanoleuca_2841_1526_1716_0.7434_PLA2	78	C	B	0.039	0.002	0.816	0.182	0.454667
N.melanoleuca_2841_1526_1716_0.7434_PLA2	79	K	B	0.502	0.005	0.262	0.733	0.459222
N.melanoleuca_2841_1526_1716_0.7434_PLA2	80	D	B	0.67	0.005	0.045	0.951	0.454556
N.melanoleuca_2841_1526_1716_0.7434_PLA2	81	G	B	0.619	0.109	0.005	0.886	0.462111
N.melanoleuca_2841_1526_1716_0.7434_PLA2	82	G	B	0.555	0.246	0.004	0.75	0.458778
N.melanoleuca_2841_1526_1716_0.7434_PLA2	83	K	B	0.406	0.858	0.002	0.139	0.469444
N.melanoleuca_2841_1526_1716_0.7434_PLA2	84	C	B	0.036	0.858	0.002	0.139	0.450222
N.melanoleuca_2841_1526_1716_0.7434_PLA2	85	A	B	0.222	0.923	0.002	0.076	0.443556
N.melanoleuca_2841_1526_1716_0.7434_PLA2	86	A	B	0.49	0.923	0.002	0.076	0.440556
N.melanoleuca_2841_1526_1716_0.7434_PLA2	87	S	B	0.219	0.97	0.001	0.03	0.410889
N.melanoleuca_2841_1526_1716_0.7434_PLA2	88	V	B	0.08	0.97	0.001	0.03	0.398333
N.melanoleuca_2841_1526_1716_0.7434_PLA2	89	C	B	0.069	0.923	0.002	0.076	0.407889
N.melanoleuca_2841_1526_1716_0.7434_PLA2	90	D	B	0.438	0.923	0.002	0.076	0.409778
N.melanoleuca_2841_1526_1716_0.7434_PLA2	91	C	B	0.034	0.923	0.002	0.076	0.400222
N.melanoleuca_2841_1526_1716_0.7434_PLA2	92	D	B	0.118	0.923	0.002	0.076	0.392222
N.melanoleuca_2841_1526_1716_0.7434_PLA2	93	R	B	0.371	0.97	0.001	0.03	0.404
N.melanoleuca_2841_1526_1716_0.7434_PLA2	94	V	B	0.246	0.988	0	0.012	0.393667
N.melanoleuca_2841_1526_1716_0.7434_PLA2	95	A	B	0.03	0.988	0	0.012	0.376667
N.melanoleuca_2841_1526_1716_0.7434_PLA2	96	A	B	0.039	0.988	0	0.012	0.395
N.melanoleuca_2841_1526_1716_0.7434_PLA2	97	N	B	0.294	0.97	0.001	0.03	0.416
N.melanoleuca_2841_1526_1716_0.7434_PLA2	98	C	B	0.022	0.97	0.001	0.03	0.413667
N.melanoleuca_2841_1526_1716_0.7434_PLA2	99	F	B	0.062	0.858	0.002	0.139	0.419333
N.melanoleuca_2841_1526_1716_0.7434_PLA2	100	A	B	0.284	0.694	0.003	0.303	0.440556
N.melanoleuca_2841_1526_1716_0.7434_PLA2	101	R	B	0.537	0.502	0.002	0.495	0.469111
N.melanoleuca_2841_1526_1716_0.7434_PLA2	102	A	B	0.14	0.109	0.005	0.886	0.496778
N.melanoleuca_2841_1526_1716_0.7434_PLA2	103	T	E	0.46	0.058	0.017	0.925	0.536444
N.melanoleuca_2841_1526_1716_0.7434_PLA2	104	Y	E	0.227	0.018	0.047	0.935	0.562222
N.melanoleuca_2841_1526_1716_0.7434_PLA2	105	N	E	0.256	0.018	0.019	0.964	0.583444
N.melanoleuca_2841_1526_1716_0.7434_PLA2	106	D	E	0.613	0.181	0.016	0.803	0.584889
N.melanoleuca_2841_1526_1716_0.7434_PLA2	107	K	E	0.619	0.181	0.016	0.803	0.591889
N.melanoleuca_2841_1526_1716_0.7434_PLA2	108	N	E	0.252	0.181	0.016	0.803	0.593
N.melanoleuca_2841_1526_1716_0.7434_PLA2	109	Y	E	0.313	0.184	0.043	0.773	0.602333
N.melanoleuca_2841_1526_1716_0.7434_PLA2	110	N	E	0.497	0.053	0.043	0.903	0.604889
N.melanoleuca_2841_1526_1716_0.7434_PLA2	111	I	E	0.176	0.053	0.043	0.903	0.588
N.melanoleuca_2841_1526_1716_0.7434_PLA2	112	D	E	0.489	0.018	0.019	0.964	0.577
N.melanoleuca_2841_1526_1716_0.7434_PLA2	113	F	E	0.486	0.018	0.019	0.964	0.560889
N.melanoleuca_2841_1526_1716_0.7434_PLA2	114	N	E	0.594	0.018	0.019	0.964	0.551556
N.melanoleuca_2841_1526_1716_0.7434_PLA2	115	A	B	0.481	0.018	0.019	0.964	0.481333
N.melanoleuca_2841_1526_1716_0.7434_PLA2	116	R	B	0.468	0.018	0.019	0.964	0.419333
N.melanoleuca_2841_1526_1716_0.7434_PLA2	117	C	B	0.091	0.018	0.019	0.964	0.359
N.melanoleuca_2841_1526_1716_0.7434_PLA2	118	Q	B	0.745	0.003	0.003	0.994	0.293444
N.mossambica_1210_1102_1125_1292_10.3747_PLA2	1	L	B	0.482	0.003	0.003	0.994	0.266556
N.mossambica_1210_1102_1125_1292_10.3747_PLA2	2	N	B	0.395	0.053	0.043	0.903	0.309778
N.mossambica_1210_1102_1125_1292_10.3747_PLA2	3	L	B	0.206	0.879	0.01	0.111	0.374
N.mossambica_1210_1102_1125_1292_10.3747_PLA2	4	Y	B	0.264	0.879	0.01	0.111	0.426222
N.mossambica_1210_1102_1125_1292_10.3747_PLA2	5	Q	B	0.279	0.938	0.007	0.055	0.461889
N.mossambica_1210_1102_1125_1292_10.3747_PLA2	6	F	B	0.054	0.938	0.007	0.055	0.460667
N.mossambica_1210_1102_1125_1292_10.3747_PLA2	7	K	B	0.23	0.923	0.002	0.076	0.477333
N.mossambica_1210_1102_1125_1292_10.3747_PLA2	8	N	B	0.376	0.923	0.002	0.076	0.470111
N.mossambica_1210_1102_1125_1292_10.3747_PLA2	9	M	B	0.054	0.97	0.001	0.03	0.457556
N.mossambica_1210_1102_1125_1292_10.3747_PLA2	10	I	B	0.032	0.975	0.003	0.022	0.429111
N.mossambica_1210_1102_1125_1292_10.3747_PLA2	11	H	B	0.331	0.938	0.007	0.055	0.453333
N.mossambica_1210_1102_1125_1292_10.3747_PLA2	12	C	B	0.2	0.879	0.01	0.111	0.445111
N.mossambica_1210_1102_1125_1292_10.3747_PLA2	13	T	B	0.133	0.802	0.014	0.185	0.454667
N.mossambica_1210_1102_1125_1292_10.3747_PLA2	14	V	B	0.115	0.339	0.016	0.645	0.472556
N.mossambica_1210_1102_1125_1292_10.3747_PLA2	15	P	B	0.462	0.058	0.017	0.925	0.485111
N.mossambica_1210_1102_1125_1292_10.3747_PLA2	16	S	B	0.442	0.018	0.019	0.964	0.484
N.mossambica_1210_1102_1125_1292_10.3747_PLA2	17	R	B	0.259	0.018	0.019	0.964	0.490444
N.mossambica_1210_1102_1125_1292_10.3747_PLA2	18	P	B	0.071	0.115	0.016	0.868	0.487889
N.mossambica_1210_1102_1125_1292_10.3747_PLA2	19	W	E	0.108	0.43	0.016	0.555	0.504333
N.mossambica_1210_1102_1125_1292_10.3747_PLA2	20	W	B	0.199	0.455	0.046	0.498	0.494889
N.mossambica_1210_1102_1125_1292_10.3747_PLA2	21	H	B	0.209	0.502	0.102	0.396	0.491
N.mossambica_1210_1102_1125_1292_10.3747_PLA2	22	F	B	0.065	0.502	0.102	0.396	0.480889
N.mossambica_1210_1102_1125_1292_10.3747_PLA2	23	A	B	0.257	0.386	0.097	0.517	0.469556
N.mossambica_1210_1102_1125_1292_10.3747_PLA2	24	D	B	0.377	0.278	0.093	0.628	0.474556
N.mossambica_1210_1102_1125_1292_10.3747_PLA2	25	Y	B	0.057	0.113	0.087	0.8	0.457778
N.mossambica_1210_1102_1125_1292_10.3747_PLA2	26	G	B	0.047	0.056	0.142	0.802	0.448444
N.mossambica_1210_1102_1125_1292_10.3747_PLA2	27	C	B	0.028	0.066	0.296	0.638	0.464778
N.mossambica_1210_1102_1125_1292_10.3747_PLA2	28	Y	B	0.08	0.021	0.451	0.528	0.473556
N.mossambica_1210_1102_1125_1292_10.3747_PLA2	29	C	B	0.02	0.022	0.359	0.619	0.478222
N.mossambica_1210_1102_1125_1292_10.3747_PLA2	30	G	E	0.096	0.02	0.205	0.775	0.507667
N.mossambica_1210_1102_1125_1292_10.3747_PLA2	31	R	E	0.301	0.019	0.141	0.84	0.533444
N.mossambica_1210_1102_1125_1292_10.3747_PLA2	32	G	E	0.352	0.005	0.045	0.951	0.563667
N.mossambica_1210_1102_1125_1292_10.3747_PLA2	33	G	E	0.311	0.005	0.045	0.951	0.578667
N.mossambica_1210_1102_1125_1292_10.3747_PLA2	34	K	E	0.545	0.018	0.047	0.935	0.598889
N.mossambica_1210_1102_1125_1292_10.3747_PLA2	35	G	E	0.45	0.005	0.045	0.951	0.625778
N.mossambica_1210_1102_1125_1292_10.3747_PLA2	36	T	E	0.418	0.005	0.015	0.979	0.638111
N.mossambica_1210_1102_1125_1292_10.3747_PLA2	37	P	E	0.299	0.018	0.047	0.935	0.633444
N.mossambica_1210_1102_1125_1292_10.3747_PLA2	38	V	E	0.464	0.018	0.047	0.935	0.637222
N.mossambica_1210_1102_1125_1292_10.3747_PLA2	39	D	E	0.469	0.018	0.047	0.935	0.623111
N.mossambica_1210_1102_1125_1292_10.3747_PLA2	40	D	E	0.569	0.053	0.043	0.903	0.598778
N.mossambica_1210_1102_1125_1292_10.3747_PLA2	41	L	E	0.371	0.053	0.043	0.903	0.581667
N.mossambica_1210_1102_1125_1292_10.3747_PLA2	42	D	E	0.378	0.053	0.043	0.903	0.576
N.mossambica_1210_1102_1125_1292_10.3747_PLA2	43	R	E	0.353	0.113	0.087	0.8	0.573
N.mossambica_1210_1102_1125_1292_10.3747_PLA2	44	C	E	0.04	0.216	0.235	0.548	0.558667
N.mossambica_1210_1102_1125_1292_10.3747_PLA2	45	C	E	0.064	0.125	0.227	0.648	0.543
N.mossambica_1210_1102_1125_1292_10.3747_PLA2	46	Q	E	0.376	0.125	0.227	0.648	0.537
N.mossambica_1210_1102_1125_1292_10.3747_PLA2	47	V	E	0.399	0.052	0.084	0.864	0.518111
N.mossambica_1210_1102_1125_1292_10.3747_PLA2	48	H	E	0.222	0.018	0.047	0.935	0.506333
N.mossambica_1210_1102_1125_1292_10.3747_PLA2	49	D	E	0.553	0.058	0.017	0.925	0.507778
N.mossambica_1210_1102_1125_1292_10.3747_PLA2	50	N	E	0.221	0.257	0.016	0.727	0.505333
N.mossambica_1210_1102_1125_1292_10.3747_PLA2	51	C	B	0.055	0.522	0.016	0.462	0.486
N.mossambica_1210_1102_1125_1292_10.3747_PLA2	52	Y	B	0.122	0.858	0.002	0.139	0.486778
N.mossambica_1210_1102_1125_1292_10.3747_PLA2	53	E	B	0.512	0.858	0.002	0.139	0.483556
N.mossambica_1210_1102_1125_1292_10.3747_PLA2	54	K	B	0.429	0.858	0.002	0.139	0.486556
N.mossambica_1210_1102_1125_1292_10.3747_PLA2	55	A	B	0.049	0.858	0.002	0.139	0.489556
N.mossambica_1210_1102_1125_1292_10.3747_PLA2	56	G	B	0.494	0.782	0.003	0.216	0.483111
N.mossambica_1210_1102_1125_1292_10.3747_PLA2	57	K	B	0.776	0.522	0.016	0.462	0.487444
N.mossambica_1210_1102_1125_1292_10.3747_PLA2	58	M	B	0.439	0.109	0.005	0.886	0.490889
N.mossambica_1210_1102_1125_1292_10.3747_PLA2	59	G	E	0.502	0.016	0.005	0.979	0.502444
N.mossambica_1210_1102_1125_1292_10.3747_PLA2	60	C	E	0.066	0.018	0.047	0.935	0.517556
N.mossambica_1210_1102_1125_1292_10.3747_PLA2	61	W	E	0.271	0.018	0.088	0.893	0.516556
N.mossambica_1210_1102_1125_1292_10.3747_PLA2	62	P	E	0.287	0.004	0.197	0.799	0.517333
N.mossambica_1210_1102_1125_1292_10.3747_PLA2	63	Y	E	0.376	0.005	0.262	0.733	0.512111
N.mossambica_1210_1102_1125_1292_10.3747_PLA2	64	L	E	0.22	0.004	0.42	0.576	0.509222
N.mossambica_1210_1102_1125_1292_10.3747_PLA2	65	T	E	0.402	0.004	0.42	0.576	0.518778
N.mossambica_1210_1102_1125_1292_10.3747_PLA2	66	L	E	0.389	0.004	0.514	0.481	0.501222
N.mossambica_1210_1102_1125_1292_10.3747_PLA2	67	Y	B	0.1	0.004	0.616	0.381	0.486556
N.mossambica_1210_1102_1125_1292_10.3747_PLA2	68	K	B	0.458	0.002	0.816	0.182	0.476444
N.mossambica_1210_1102_1125_1292_10.3747_PLA2	69	Y	B	0.089	0.011	0.918	0.071	0.468889
N.mossambica_1210_1102_1125_1292_10.3747_PLA2	70	K	B	0.423	0.011	0.918	0.071	0.467778
N.mossambica_1210_1102_1125_1292_10.3747_PLA2	71	C	B	0.137	0.001	0.9	0.099	0.464667
N.mossambica_1210_1102_1125_1292_10.3747_PLA2	72	S	B	0.519	0.002	0.816	0.182	0.450111
N.mossambica_1210_1102_1125_1292_10.3747_PLA2	73	Q	B	0.721	0.005	0.045	0.951	0.447
N.mossambica_1210_1102_1125_1292_10.3747_PLA2	74	G	B	0.535	0.005	0.015	0.979	0.426
N.mossambica_1210_1102_1125_1292_10.3747_PLA2	75	K	B	0.542	0.004	0.616	0.381	0.437889
N.mossambica_1210_1102_1125_1292_10.3747_PLA2	76	L	B	0.056	0.001	0.9	0.099	0.452333
N.mossambica_1210_1102_1125_1292_10.3747_PLA2	77	T	B	0.349	0.001	0.959	0.04	0.461222
N.mossambica_1210_1102_1125_1292_10.3747_PLA2	78	C	B	0.039	0.002	0.816	0.182	0.466222
N.mossambica_1210_1102_1125_1292_10.3747_PLA2	79	S	B	0.421	0.005	0.336	0.66	0.464
N.mossambica_1210_1102_1125_1292_10.3747_PLA2	80	G	B	0.711	0.005	0.045	0.951	0.461778
N.mossambica_1210_1102_1125_1292_10.3747_PLA2	81	G	B	0.708	0.003	0.003	0.994	0.460111
N.mossambica_1210_1102_1125_1292_10.3747_PLA2	82	N	B	0.586	0.016	0.005	0.979	0.463556
N.mossambica_1210_1102_1125_1292_10.3747_PLA2	83	S	B	0.564	0.246	0.004	0.75	0.478889
N.mossambica_1210_1102_1125_1292_10.3747_PLA2	84	K	B	0.443	0.782	0.003	0.216	0.469111
N.mossambica_1210_1102_1125_1292_10.3747_PLA2	85	C	B	0.031	0.858	0.002	0.139	0.453444
N.mossambica_1210_1102_1125_1292_10.3747_PLA2	86	G	B	0.221	0.858	0.002	0.139	0.434778
N.mossambica_1210_1102_1125_1292_10.3747_PLA2	87	A	B	0.495	0.938	0.007	0.055	0.436667
N.mossambica_1210_1102_1125_1292_10.3747_PLA2	88	A	B	0.249	0.938	0.007	0.055	0.406556
N.mossambica_1210_1102_1125_1292_10.3747_PLA2	89	V	B	0.106	0.923	0.002	0.076	0.400889
N.mossambica_1210_1102_1125_1292_10.3747_PLA2	90	C	B	0.074	0.923	0.002	0.076	0.409222
N.mossambica_1210_1102_1125_1292_10.3747_PLA2	91	N	B	0.475	0.923	0.002	0.076	0.406333
N.mossambica_1210_1102_1125_1292_10.3747_PLA2	92	C	B	0.034	0.923	0.002	0.076	0.394111
N.mossambica_1210_1102_1125_1292_10.3747_PLA2	93	D	B	0.113	0.97	0.001	0.03	0.380889
N.mossambica_1210_1102_1125_1292_10.3747_PLA2	94	L	B	0.361	0.988	0	0.012	0.385889
N.mossambica_1210_1102_1125_1292_10.3747_PLA2	95	V	B	0.233	0.988	0	0.012	0.374667
N.mossambica_1210_1102_1125_1292_10.3747_PLA2	96	A	B	0.026	0.988	0	0.012	0.36
N.mossambica_1210_1102_1125_1292_10.3747_PLA2	97	A	B	0.051	0.97	0.001	0.03	0.380889
N.mossambica_1210_1102_1125_1292_10.3747_PLA2	98	N	B	0.311	0.97	0.001	0.03	0.396778
N.mossambica_1210_1102_1125_1292_10.3747_PLA2	99	C	B	0.025	0.923	0.002	0.076	0.402444
N.mossambica_1210_1102_1125_1292_10.3747_PLA2	100	F	B	0.052	0.782	0.003	0.216	0.416889
N.mossambica_1210_1102_1125_1292_10.3747_PLA2	101	A	B	0.307	0.502	0.002	0.495	0.438222
N.mossambica_1210_1102_1125_1292_10.3747_PLA2	102	G	B	0.611	0.321	0.003	0.675	0.457
N.mossambica_1210_1102_1125_1292_10.3747_PLA2	103	A	B	0.132	0.109	0.005	0.886	0.484333
N.mossambica_1210_1102_1125_1292_10.3747_PLA2	104	R	E	0.487	0.058	0.017	0.925	0.519333
N.mossambica_1210_1102_1125_1292_10.3747_PLA2	105	Y	E	0.284	0.018	0.047	0.935	0.538889
N.mossambica_1210_1102_1125_1292_10.3747_PLA2	106	I	E	0.225	0.018	0.047	0.935	0.551556
N.mossambica_1210_1102_1125_1292_10.3747_PLA2	107	D	E	0.538	0.113	0.043	0.844	0.561
N.mossambica_1210_1102_1125_1292_10.3747_PLA2	108	A	E	0.631	0.181	0.016	0.803	0.566
N.mossambica_1210_1102_1125_1292_10.3747_PLA2	109	N	E	0.359	0.184	0.043	0.773	0.566556
N.mossambica_1210_1102_1125_1292_10.3747_PLA2	110	Y	E	0.204	0.113	0.043	0.844	0.579778
N.mossambica_1210_1102_1125_1292_10.3747_PLA2	111	N	E	0.481	0.052	0.084	0.864	0.599556
N.mossambica_1210_1102_1125_1292_10.3747_PLA2	112	I	E	0.227	0.053	0.043	0.903	0.592667
N.mossambica_1210_1102_1125_1292_10.3747_PLA2	113	N	E	0.462	0.018	0.019	0.964	0.586444
N.mossambica_1210_1102_1125_1292_10.3747_PLA2	114	F	E	0.519	0.018	0.019	0.964	0.572111
N.mossambica_1210_1102_1125_1292_10.3747_PLA2	115	K	E	0.623	0.018	0.019	0.964	0.573667
N.mossambica_1210_1102_1125_1292_10.3747_PLA2	116	K	E	0.521	0.018	0.019	0.964	0.503222
N.mossambica_1210_1102_1125_1292_10.3747_PLA2	117	R	B	0.415	0.018	0.019	0.964	0.444
N.mossambica_1210_1102_1125_1292_10.3747_PLA2	118	C	B	0.066	0.018	0.019	0.964	0.376
N.mossambica_1210_1102_1125_1292_10.3747_PLA2	119	Q	B	0.716	0.003	0.003	0.994	0.308667
N.mossambica_1223_1093_0.0180_PLA2	1	N	B	0.695	0.003	0.003	0.994	0.252556
N.mossambica_1223_1093_0.0180_PLA2	2	L	B	0.256	0.858	0.002	0.139	0.316667
N.mossambica_1223_1093_0.0180_PLA2	3	Y	B	0.284	0.858	0.002	0.139	0.368556
N.mossambica_1223_1093_0.0180_PLA2	4	Q	B	0.325	0.879	0.01	0.111	0.404333
N.mossambica_1223_1093_0.0180_PLA2	5	F	B	0.05	0.938	0.007	0.055	0.439333
N.mossambica_1223_1093_0.0180_PLA2	6	K	B	0.221	0.923	0.002	0.076	0.463889
N.mossambica_1223_1093_0.0180_PLA2	7	N	B	0.403	0.97	0.001	0.03	0.459556
N.mossambica_1223_1093_0.0180_PLA2	8	M	B	0.057	0.97	0.001	0.03	0.447222
N.mossambica_1223_1093_0.0180_PLA2	9	I	B	0.032	0.97	0.001	0.03	0.427222
N.mossambica_1223_1093_0.0180_PLA2	10	H	B	0.334	0.938	0.007	0.055	0.449556
N.mossambica_1223_1093_0.0180_PLA2	11	C	B	0.195	0.879	0.01	0.111	0.439667
N.mossambica_1223_1093_0.0180_PLA2	12	T	B	0.126	0.802	0.014	0.185	0.449
N.mossambica_1223_1093_0.0180_PLA2	13	V	B	0.106	0.339	0.016	0.645	0.466778
N.mossambica_1223_1093_0.0180_PLA2	14	P	B	0.452	0.058	0.017	0.925	0.479111
N.mossambica_1223_1093_0.0180_PLA2	15	S	B	0.431	0.018	0.019	0.964	0.478333
N.mossambica_1223_1093_0.0180_PLA2	16	R	B	0.26	0.018	0.019	0.964	0.485111
N.mossambica_1223_1093_0.0180_PLA2	17	P	B	0.069	0.115	0.016	0.868	0.483778
N.mossambica_1223_1093_0.0180_PLA2	18	W	E	0.105	0.43	0.016	0.555	0.501
N.mossambica_1223_1093_0.0180_PLA2	19	W	B	0.194	0.455	0.046	0.498	0.491889
N.mossambica_1223_1093_0.0180_PLA2	20	H	B	0.204	0.502	0.102	0.396	0.490667
N.mossambica_1223_1093_0.0180_PLA2	21	F	B	0.063	0.502	0.102	0.396	0.481222
N.mossambica_1223_1093_0.0180_PLA2	22	A	B	0.254	0.386	0.097	0.517	0.470111
N.mossambica_1223_1093_0.0180_PLA2	23	D	B	0.375	0.278	0.093	0.628	0.475
N.mossambica_1223_1093_0.0180_PLA2	24	Y	B	0.057	0.113	0.087	0.8	0.458667
N.mossambica_1223_1093_0.0180_PLA2	25	G	B	0.046	0.019	0.141	0.84	0.448556
N.mossambica_1223_1093_0.0180_PLA2	26	C	B	0.027	0.022	0.359	0.619	0.463444
N.mossambica_1223_1093_0.0180_PLA2	27	Y	B	0.076	0.021	0.451	0.528	0.470444
N.mossambica_1223_1093_0.0180_PLA2	28	C	B	0.019	0.022	0.359	0.619	0.475222
N.mossambica_1223_1093_0.0180_PLA2	29	G	E	0.089	0.021	0.279	0.699	0.503778
N.mossambica_1223_1093_0.0180_PLA2	30	R	E	0.289	0.019	0.141	0.84	0.528889
N.mossambica_1223_1093_0.0180_PLA2	31	G	E	0.342	0.005	0.045	0.951	0.558444
N.mossambica_1223_1093_0.0180_PLA2	32	G	E	0.308	0.005	0.045	0.951	0.572778
N.mossambica_1223_1093_0.0180_PLA2	33	K	E	0.541	0.018	0.047	0.935	0.592222
N.mossambica_1223_1093_0.0180_PLA2	34	G	E	0.441	0.005	0.045	0.951	0.619444
N.mossambica_1223_1093_0.0180_PLA2	35	T	E	0.418	0.005	0.045	0.951	0.632667
N.mossambica_1223_1093_0.0180_PLA2	36	P	E	0.294	0.018	0.047	0.935	0.629778
N.mossambica_1223_1093_0.0180_PLA2	37	V	E	0.46	0.018	0.047	0.935	0.633667
N.mossambica_1223_1093_0.0180_PLA2	38	D	E	0.464	0.018	0.047	0.935	0.619222
N.mossambica_1223_1093_0.0180_PLA2	39	D	E	0.565	0.053	0.043	0.903	0.595556
N.mossambica_1223_1093_0.0180_PLA2	40	L	E	0.369	0.053	0.043	0.903	0.578333
N.mossambica_1223_1093_0.0180_PLA2	41	D	E	0.374	0.053	0.043	0.903	0.573333
N.mossambica_1223_1093_0.0180_PLA2	42	R	E	0.354	0.113	0.087	0.8	0.570778
N.mossambica_1223_1093_0.0180_PLA2	43	C	E	0.039	0.199	0.152	0.649	0.556667
N.mossambica_1223_1093_0.0180_PLA2	44	C	E	0.062	0.125	0.227	0.648	0.54
N.mossambica_1223_1093_0.0180_PLA2	45	Q	E	0.381	0.125	0.227	0.648	0.535222
N.mossambica_1223_1093_0.0180_PLA2	46	V	E	0.392	0.052	0.084	0.864	0.516667
N.mossambica_1223_1093_0.0180_PLA2	47	H	E	0.212	0.053	0.043	0.903	0.504778
N.mossambica_1223_1093_0.0180_PLA2	48	D	E	0.536	0.058	0.017	0.925	0.506444
N.mossambica_1223_1093_0.0180_PLA2	49	N	E	0.217	0.257	0.016	0.727	0.505111
N.mossambica_1223_1093_0.0180_PLA2	50	C	B	0.052	0.522	0.016	0.462	0.486333
N.mossambica_1223_1093_0.0180_PLA2	51	Y	B	0.12	0.879	0.01	0.111	0.487222
N.mossambica_1223_1093_0.0180_PLA2	52	E	B	0.509	0.858	0.002	0.139	0.485
N.mossambica_1223_1093_0.0180_PLA2	53	K	B	0.421	0.879	0.01	0.111	0.488667
N.mossambica_1223_1093_0.0180_PLA2	54	A	B	0.043	0.802	0.014	0.185	0.491889
N.mossambica_1223_1093_0.0180_PLA2	55	G	B	0.48	0.717	0.014	0.269	0.484667
N.mossambica_1223_1093_0.0180_PLA2	56	K	B	0.761	0.522	0.016	0.462	0.490333
N.mossambica_1223_1093_0.0180_PLA2	57	M	B	0.374	0.115	0.016	0.868	0.494333
N.mossambica_1223_1093_0.0180_PLA2	58	G	E	0.474	0.018	0.019	0.964	0.503333
N.mossambica_1223_1093_0.0180_PLA2	59	C	E	0.066	0.018	0.047	0.935	0.519
N.mossambica_1223_1093_0.0180_PLA2	60	W	E	0.271	0.018	0.088	0.893	0.516889
N.mossambica_1223_1093_0.0180_PLA2	61	P	E	0.291	0.004	0.138	0.858	0.514556
N.mossambica_1223_1093_0.0180_PLA2	62	Y	E	0.363	0.005	0.262	0.733	0.513111
N.mossambica_1223_1093_0.0180_PLA2	63	F	E	0.185	0.004	0.42	0.576	0.510556
N.mossambica_1223_1093_0.0180_PLA2	64	T	E	0.378	0.004	0.514	0.481	0.523667
N.mossambica_1223_1093_0.0180_PLA2	65	L	E	0.37	0.004	0.616	0.381	0.504444
N.mossambica_1223_1093_0.0180_PLA2	66	Y	B	0.1	0.003	0.718	0.279	0.489667
N.mossambica_1223_1093_0.0180_PLA2	67	K	B	0.425	0.002	0.816	0.182	0.48
N.mossambica_1223_1093_0.0180_PLA2	68	Y	B	0.097	0.011	0.918	0.071	0.470889
N.mossambica_1223_1093_0.0180_PLA2	69	K	B	0.398	0.011	0.918	0.071	0.471
N.mossambica_1223_1093_0.0180_PLA2	70	C	B	0.125	0.001	0.959	0.04	0.470444
N.mossambica_1223_1093_0.0180_PLA2	71	S	B	0.524	0.002	0.816	0.182	0.453
N.mossambica_1223_1093_0.0180_PLA2	72	Q	B	0.703	0.005	0.045	0.951	0.447
N.mossambica_1223_1093_0.0180_PLA2	73	G	B	0.554	0.005	0.015	0.979	0.423556
N.mossambica_1223_1093_0.0180_PLA2	74	K	B	0.56	0.004	0.514	0.481	0.435778
N.mossambica_1223_1093_0.0180_PLA2	75	L	B	0.05	0.002	0.816	0.182	0.449111
N.mossambica_1223_1093_0.0180_PLA2	76	T	B	0.371	0.001	0.9	0.099	0.459444
N.mossambica_1223_1093_0.0180_PLA2	77	C	B	0.037	0.002	0.816	0.182	0.465889
N.mossambica_1223_1093_0.0180_PLA2	78	S	B	0.409	0.004	0.42	0.576	0.462889
N.mossambica_1223_1093_0.0180_PLA2	79	G	B	0.696	0.005	0.045	0.951	0.461333
N.mossambica_1223_1093_0.0180_PLA2	80	G	B	0.693	0.003	0.003	0.994	0.461111
N.mossambica_1223_1093_0.0180_PLA2	81	N	B	0.61	0.016	0.005	0.979	0.463111
N.mossambica_1223_1093_0.0180_PLA2	82	S	B	0.538	0.246	0.004	0.75	0.479444
N.mossambica_1223_1093_0.0180_PLA2	83	K	B	0.427	0.782	0.003	0.216	0.469444
N.mossambica_1223_1093_0.0180_PLA2	84	C	B	0.031	0.802	0.014	0.185	0.452556
N.mossambica_1223_1093_0.0180_PLA2	85	G	B	0.219	0.879	0.01	0.111	0.434222
N.mossambica_1223_1093_0.0180_PLA2	86	A	B	0.483	0.879	0.01	0.111	0.435444
N.mossambica_1223_1093_0.0180_PLA2	87	A	B	0.243	0.938	0.007	0.055	0.406556
N.mossambica_1223_1093_0.0180_PLA2	88	V	B	0.096	0.938	0.007	0.055	0.399889
N.mossambica_1223_1093_0.0180_PLA2	89	C	B	0.071	0.938	0.007	0.055	0.406778
N.mossambica_1223_1093_0.0180_PLA2	90	N	B	0.468	0.923	0.002	0.076	0.406667
N.mossambica_1223_1093_0.0180_PLA2	91	C	B	0.033	0.923	0.002	0.076	0.393778
N.mossambica_1223_1093_0.0180_PLA2	92	D	B	0.106	0.97	0.001	0.03	0.379778
N.mossambica_1223_1093_0.0180_PLA2	93	L	B	0.35	0.988	0	0.012	0.384778
N.mossambica_1223_1093_0.0180_PLA2	94	V	B	0.241	0.988	0	0.012	0.374
N.mossambica_1223_1093_0.0180_PLA2	95	A	B	0.025	0.988	0	0.012	0.358333
N.mossambica_1223_1093_0.0180_PLA2	96	A	B	0.047	0.97	0.001	0.03	0.378111
N.mossambica_1223_1093_0.0180_PLA2	97	N	B	0.302	0.97	0.001	0.03	0.392333
N.mossambica_1223_1093_0.0180_PLA2	98	C	B	0.025	0.923	0.002	0.076	0.398333
N.mossambica_1223_1093_0.0180_PLA2	99	F	B	0.049	0.782	0.003	0.216	0.413556
N.mossambica_1223_1093_0.0180_PLA2	100	A	B	0.295	0.502	0.002	0.495	0.434
N.mossambica_1223_1093_0.0180_PLA2	101	G	B	0.609	0.321	0.003	0.675	0.454333
N.mossambica_1223_1093_0.0180_PLA2	102	A	B	0.129	0.109	0.005	0.886	0.483333
N.mossambica_1223_1093_0.0180_PLA2	103	R	E	0.477	0.058	0.017	0.925	0.518333
N.mossambica_1223_1093_0.0180_PLA2	104	Y	E	0.288	0.018	0.047	0.935	0.539667
N.mossambica_1223_1093_0.0180_PLA2	105	I	E	0.225	0.018	0.047	0.935	0.553222
N.mossambica_1223_1093_0.0180_PLA2	106	D	E	0.55	0.113	0.043	0.844	0.565333
N.mossambica_1223_1093_0.0180_PLA2	107	A	E	0.611	0.181	0.016	0.803	0.569889
N.mossambica_1223_1093_0.0180_PLA2	108	N	E	0.364	0.184	0.043	0.773	0.569
N.mossambica_1223_1093_0.0180_PLA2	109	Y	E	0.203	0.113	0.043	0.844	0.582444
N.mossambica_1223_1093_0.0180_PLA2	110	N	E	0.482	0.113	0.087	0.8	0.602556
N.mossambica_1223_1093_0.0180_PLA2	111	I	E	0.219	0.053	0.043	0.903	0.595667
N.mossambica_1223_1093_0.0180_PLA2	112	N	E	0.453	0.018	0.019	0.964	0.588778
N.mossambica_1223_1093_0.0180_PLA2	113	F	E	0.523	0.018	0.019	0.964	0.574
N.mossambica_1223_1093_0.0180_PLA2	114	K	E	0.618	0.018	0.019	0.964	0.575111
N.mossambica_1223_1093_0.0180_PLA2	115	K	E	0.519	0.018	0.019	0.964	0.503667
N.mossambica_1223_1093_0.0180_PLA2	116	R	B	0.411	0.018	0.019	0.964	0.444444
N.mossambica_1223_1093_0.0180_PLA2	117	C	B	0.064	0.018	0.019	0.964	0.377111
N.mossambica_1223_1093_0.0180_PLA2	118	Q	B	0.717	0.003	0.003	0.994	0.309778
N.mossambica_1296_1371_1364_1434_1322_1339_1043_1.7546_PLA2	1	L	B	0.482	0.003	0.003	0.994	0.265556
N.mossambica_1296_1371_1364_1434_1322_1339_1043_1.7546_PLA2	2	N	B	0.363	0.053	0.043	0.903	0.308667
N.mossambica_1296_1371_1364_1434_1322_1339_1043_1.7546_PLA2	3	L	B	0.211	0.879	0.01	0.111	0.373667
N.mossambica_1296_1371_1364_1434_1322_1339_1043_1.7546_PLA2	4	Y	B	0.263	0.879	0.01	0.111	0.425667
N.mossambica_1296_1371_1364_1434_1322_1339_1043_1.7546_PLA2	5	Q	B	0.274	0.938	0.007	0.055	0.460556
N.mossambica_1296_1371_1364_1434_1322_1339_1043_1.7546_PLA2	6	F	B	0.056	0.938	0.007	0.055	0.459111
N.mossambica_1296_1371_1364_1434_1322_1339_1043_1.7546_PLA2	7	K	B	0.233	0.923	0.002	0.076	0.476111
N.mossambica_1296_1371_1364_1434_1322_1339_1043_1.7546_PLA2	8	N	B	0.382	0.923	0.002	0.076	0.468889
N.mossambica_1296_1371_1364_1434_1322_1339_1043_1.7546_PLA2	9	M	B	0.054	0.923	0.002	0.076	0.458667
N.mossambica_1296_1371_1364_1434_1322_1339_1043_1.7546_PLA2	10	I	B	0.037	0.938	0.007	0.055	0.430889
N.mossambica_1296_1371_1364_1434_1322_1339_1043_1.7546_PLA2	11	H	B	0.36	0.938	0.007	0.055	0.455889
N.mossambica_1296_1371_1364_1434_1322_1339_1043_1.7546_PLA2	12	C	B	0.201	0.879	0.01	0.111	0.449111
N.mossambica_1296_1371_1364_1434_1322_1339_1043_1.7546_PLA2	13	T	B	0.132	0.717	0.014	0.269	0.461556
N.mossambica_1296_1371_1364_1434_1322_1339_1043_1.7546_PLA2	14	V	B	0.114	0.339	0.016	0.645	0.483333
N.mossambica_1296_1371_1364_1434_1322_1339_1043_1.7546_PLA2	15	P	B	0.446	0.058	0.017	0.925	0.499222
N.mossambica_1296_1371_1364_1434_1322_1339_1043_1.7546_PLA2	16	S	E	0.429	0.018	0.019	0.964	0.500778
N.mossambica_1296_1371_1364_1434_1322_1339_1043_1.7546_PLA2	17	R	E	0.279	0.018	0.019	0.964	0.509667
N.mossambica_1296_1371_1364_1434_1322_1339_1043_1.7546_PLA2	18	P	E	0.099	0.058	0.017	0.925	0.512556
N.mossambica_1296_1371_1364_1434_1322_1339_1043_1.7546_PLA2	19	W	E	0.127	0.268	0.043	0.689	0.531111
N.mossambica_1296_1371_1364_1434_1322_1339_1043_1.7546_PLA2	20	W	E	0.208	0.278	0.093	0.628	0.524333
N.mossambica_1296_1371_1364_1434_1322_1339_1043_1.7546_PLA2	21	H	E	0.232	0.307	0.165	0.527	0.519667
N.mossambica_1296_1371_1364_1434_1322_1339_1043_1.7546_PLA2	22	F	E	0.071	0.307	0.165	0.527	0.506667
N.mossambica_1296_1371_1364_1434_1322_1339_1043_1.7546_PLA2	23	A	B	0.281	0.278	0.093	0.628	0.491889
N.mossambica_1296_1371_1364_1434_1322_1339_1043_1.7546_PLA2	24	D	B	0.367	0.191	0.086	0.723	0.493222
N.mossambica_1296_1371_1364_1434_1322_1339_1043_1.7546_PLA2	25	Y	B	0.056	0.052	0.084	0.864	0.473222
N.mossambica_1296_1371_1364_1434_1322_1339_1043_1.7546_PLA2	26	G	B	0.047	0.019	0.141	0.84	0.459
N.mossambica_1296_1371_1364_1434_1322_1339_1043_1.7546_PLA2	27	C	B	0.028	0.022	0.359	0.619	0.47
N.mossambica_1296_1371_1364_1434_1322_1339_1043_1.7546_PLA2	28	Y	B	0.084	0.021	0.451	0.528	0.476667
N.mossambica_1296_1371_1364_1434_1322_1339_1043_1.7546_PLA2	29	C	B	0.021	0.022	0.359	0.619	0.473778
N.mossambica_1296_1371_1364_1434_1322_1339_1043_1.7546_PLA2	30	G	B	0.101	0.02	0.205	0.775	0.493444
N.mossambica_1296_1371_1364_1434_1322_1339_1043_1.7546_PLA2	31	R	E	0.291	0.018	0.088	0.893	0.520333
N.mossambica_1296_1371_1364_1434_1322_1339_1043_1.7546_PLA2	32	G	E	0.354	0.005	0.045	0.951	0.546667
N.mossambica_1296_1371_1364_1434_1322_1339_1043_1.7546_PLA2	33	G	E	0.249	0.005	0.045	0.951	0.558333
N.mossambica_1296_1371_1364_1434_1322_1339_1043_1.7546_PLA2	34	T	E	0.557	0.018	0.047	0.935	0.576667
N.mossambica_1296_1371_1364_1434_1322_1339_1043_1.7546_PLA2	35	G	E	0.43	0.005	0.045	0.951	0.606667
N.mossambica_1296_1371_1364_1434_1322_1339_1043_1.7546_PLA2	36	T	E	0.475	0.005	0.045	0.951	0.618333
N.mossambica_1296_1371_1364_1434_1322_1339_1043_1.7546_PLA2	37	P	E	0.292	0.018	0.047	0.935	0.609
N.mossambica_1296_1371_1364_1434_1322_1339_1043_1.7546_PLA2	38	V	E	0.413	0.018	0.047	0.935	0.614444
N.mossambica_1296_1371_1364_1434_1322_1339_1043_1.7546_PLA2	39	D	E	0.513	0.018	0.019	0.964	0.605
N.mossambica_1296_1371_1364_1434_1322_1339_1043_1.7546_PLA2	40	D	E	0.566	0.058	0.017	0.925	0.577667
N.mossambica_1296_1371_1364_1434_1322_1339_1043_1.7546_PLA2	41	L	E	0.304	0.115	0.016	0.868	0.562333
N.mossambica_1296_1371_1364_1434_1322_1339_1043_1.7546_PLA2	42	D	E	0.462	0.181	0.016	0.803	0.556889
N.mossambica_1296_1371_1364_1434_1322_1339_1043_1.7546_PLA2	43	R	E	0.361	0.268	0.043	0.689	0.555444
N.mossambica_1296_1371_1364_1434_1322_1339_1043_1.7546_PLA2	44	C	E	0.041	0.386	0.097	0.517	0.538111
N.mossambica_1296_1371_1364_1434_1322_1339_1043_1.7546_PLA2	45	C	E	0.045	0.428	0.171	0.402	0.517444
N.mossambica_1296_1371_1364_1434_1322_1339_1043_1.7546_PLA2	46	Q	E	0.354	0.307	0.165	0.527	0.516222
N.mossambica_1296_1371_1364_1434_1322_1339_1043_1.7546_PLA2	47	V	B	0.422	0.191	0.086	0.723	0.495778
N.mossambica_1296_1371_1364_1434_1322_1339_1043_1.7546_PLA2	48	H	B	0.155	0.053	0.043	0.903	0.488333
N.mossambica_1296_1371_1364_1434_1322_1339_1043_1.7546_PLA2	49	D	B	0.619	0.058	0.017	0.925	0.485444
N.mossambica_1296_1371_1364_1434_1322_1339_1043_1.7546_PLA2	50	N	B	0.247	0.181	0.016	0.803	0.476778
N.mossambica_1296_1371_1364_1434_1322_1339_1043_1.7546_PLA2	51	C	B	0.045	0.522	0.016	0.462	0.458778
N.mossambica_1296_1371_1364_1434_1322_1339_1043_1.7546_PLA2	52	Y	B	0.149	0.858	0.002	0.139	0.465333
N.mossambica_1296_1371_1364_1434_1322_1339_1043_1.7546_PLA2	53	G	B	0.598	0.858	0.002	0.139	0.466
N.mossambica_1296_1371_1364_1434_1322_1339_1043_1.7546_PLA2	54	E	B	0.42	0.858	0.002	0.139	0.477111
N.mossambica_1296_1371_1364_1434_1322_1339_1043_1.7546_PLA2	55	A	B	0.043	0.782	0.003	0.216	0.483111
N.mossambica_1296_1371_1364_1434_1322_1339_1043_1.7546_PLA2	56	E	B	0.556	0.694	0.003	0.303	0.486778
N.mossambica_1296_1371_1364_1434_1322_1339_1043_1.7546_PLA2	57	K	B	0.73	0.502	0.002	0.495	0.495778
N.mossambica_1296_1371_1364_1434_1322_1339_1043_1.7546_PLA2	58	L	E	0.452	0.109	0.005	0.886	0.510444
N.mossambica_1296_1371_1364_1434_1322_1339_1043_1.7546_PLA2	59	G	E	0.532	0.018	0.019	0.964	0.533444
N.mossambica_1296_1371_1364_1434_1322_1339_1043_1.7546_PLA2	60	C	E	0.147	0.018	0.047	0.935	0.552111
N.mossambica_1296_1371_1364_1434_1322_1339_1043_1.7546_PLA2	61	W	E	0.279	0.004	0.085	0.91	0.545667
N.mossambica_1296_1371_1364_1434_1322_1339_1043_1.7546_PLA2	62	P	E	0.403	0.004	0.197	0.799	0.544444
N.mossambica_1296_1371_1364_1434_1322_1339_1043_1.7546_PLA2	63	Y	E	0.4	0.005	0.262	0.733	0.532667
N.mossambica_1296_1371_1364_1434_1322_1339_1043_1.7546_PLA2	64	L	E	0.222	0.004	0.42	0.576	0.527333
N.mossambica_1296_1371_1364_1434_1322_1339_1043_1.7546_PLA2	65	T	E	0.445	0.005	0.336	0.66	0.527778
N.mossambica_1296_1371_1364_1434_1322_1339_1043_1.7546_PLA2	66	L	E	0.432	0.004	0.42	0.576	0.503333
N.mossambica_1296_1371_1364_1434_1322_1339_1043_1.7546_PLA2	67	Y	B	0.089	0.004	0.616	0.381	0.482111
N.mossambica_1296_1371_1364_1434_1322_1339_1043_1.7546_PLA2	68	K	B	0.434	0.002	0.816	0.182	0.469444
N.mossambica_1296_1371_1364_1434_1322_1339_1043_1.7546_PLA2	69	Y	B	0.089	0.011	0.918	0.071	0.460444
N.mossambica_1296_1371_1364_1434_1322_1339_1043_1.7546_PLA2	70	E	B	0.438	0.011	0.918	0.071	0.460111
N.mossambica_1296_1371_1364_1434_1322_1339_1043_1.7546_PLA2	71	C	B	0.152	0.001	0.959	0.04	0.459333
N.mossambica_1296_1371_1364_1434_1322_1339_1043_1.7546_PLA2	72	S	B	0.571	0.002	0.816	0.182	0.448
N.mossambica_1296_1371_1364_1434_1322_1339_1043_1.7546_PLA2	73	Q	B	0.73	0.005	0.045	0.951	0.443667
N.mossambica_1296_1371_1364_1434_1322_1339_1043_1.7546_PLA2	74	G	B	0.454	0.005	0.015	0.979	0.424222
N.mossambica_1296_1371_1364_1434_1322_1339_1043_1.7546_PLA2	75	K	B	0.536	0.004	0.616	0.381	0.436889
N.mossambica_1296_1371_1364_1434_1322_1339_1043_1.7546_PLA2	76	L	B	0.048	0.002	0.816	0.182	0.454222
N.mossambica_1296_1371_1364_1434_1322_1339_1043_1.7546_PLA2	77	T	B	0.379	0.001	0.9	0.099	0.464889
N.mossambica_1296_1371_1364_1434_1322_1339_1043_1.7546_PLA2	78	C	B	0.031	0.002	0.816	0.182	0.477333
N.mossambica_1296_1371_1364_1434_1322_1339_1043_1.7546_PLA2	79	S	B	0.492	0.005	0.262	0.733	0.481556
N.mossambica_1296_1371_1364_1434_1322_1339_1043_1.7546_PLA2	80	G	B	0.617	0.005	0.045	0.951	0.483444
N.mossambica_1296_1371_1364_1434_1322_1339_1043_1.7546_PLA2	81	G	B	0.663	0.003	0.003	0.994	0.488222
N.mossambica_1296_1371_1364_1434_1322_1339_1043_1.7546_PLA2	82	N	B	0.642	0.053	0.005	0.942	0.492
N.mossambica_1296_1371_1364_1434_1322_1339_1043_1.7546_PLA2	83	N	E	0.586	0.246	0.004	0.75	0.514333
N.mossambica_1296_1371_1364_1434_1322_1339_1043_1.7546_PLA2	84	K	E	0.455	0.858	0.002	0.139	0.505889
N.mossambica_1296_1371_1364_1434_1322_1339_1043_1.7546_PLA2	85	C	B	0.036	0.782	0.003	0.216	0.488
N.mossambica_1296_1371_1364_1434_1322_1339_1043_1.7546_PLA2	86	Q	B	0.234	0.858	0.002	0.139	0.466889
N.mossambica_1296_1371_1364_1434_1322_1339_1043_1.7546_PLA2	87	A	B	0.512	0.923	0.002	0.076	0.460667
N.mossambica_1296_1371_1364_1434_1322_1339_1043_1.7546_PLA2	88	A	B	0.284	0.923	0.002	0.076	0.424222
N.mossambica_1296_1371_1364_1434_1322_1339_1043_1.7546_PLA2	89	V	B	0.091	0.923	0.002	0.076	0.413667
N.mossambica_1296_1371_1364_1434_1322_1339_1043_1.7546_PLA2	90	C	B	0.07	0.923	0.002	0.076	0.418
N.mossambica_1296_1371_1364_1434_1322_1339_1043_1.7546_PLA2	91	N	B	0.508	0.923	0.002	0.076	0.415333
N.mossambica_1296_1371_1364_1434_1322_1339_1043_1.7546_PLA2	92	C	B	0.042	0.858	0.002	0.139	0.398556
N.mossambica_1296_1371_1364_1434_1322_1339_1043_1.7546_PLA2	93	D	B	0.126	0.923	0.002	0.076	0.388111
N.mossambica_1296_1371_1364_1434_1322_1339_1043_1.7546_PLA2	94	L	B	0.359	0.97	0.001	0.03	0.393889
N.mossambica_1296_1371_1364_1434_1322_1339_1043_1.7546_PLA2	95	V	B	0.297	0.988	0	0.012	0.382111
N.mossambica_1296_1371_1364_1434_1322_1339_1043_1.7546_PLA2	96	A	B	0.028	0.988	0	0.012	0.365556
N.mossambica_1296_1371_1364_1434_1322_1339_1043_1.7546_PLA2	97	A	B	0.047	0.97	0.001	0.03	0.385111
N.mossambica_1296_1371_1364_1434_1322_1339_1043_1.7546_PLA2	98	N	B	0.327	0.97	0.001	0.03	0.397
N.mossambica_1296_1371_1364_1434_1322_1339_1043_1.7546_PLA2	99	C	B	0.029	0.923	0.002	0.076	0.398111
N.mossambica_1296_1371_1364_1434_1322_1339_1043_1.7546_PLA2	100	F	B	0.051	0.858	0.002	0.139	0.408444
N.mossambica_1296_1371_1364_1434_1322_1339_1043_1.7546_PLA2	101	A	B	0.373	0.694	0.003	0.303	0.428889
N.mossambica_1296_1371_1364_1434_1322_1339_1043_1.7546_PLA2	102	G	B	0.605	0.502	0.002	0.495	0.445111
N.mossambica_1296_1371_1364_1434_1322_1339_1043_1.7546_PLA2	103	A	B	0.12	0.109	0.005	0.886	0.469444
N.mossambica_1296_1371_1364_1434_1322_1339_1043_1.7546_PLA2	104	R	E	0.543	0.058	0.017	0.925	0.504889
N.mossambica_1296_1371_1364_1434_1322_1339_1043_1.7546_PLA2	105	Y	E	0.221	0.018	0.047	0.935	0.525333
N.mossambica_1296_1371_1364_1434_1322_1339_1043_1.7546_PLA2	106	I	E	0.213	0.053	0.043	0.903	0.541556
N.mossambica_1296_1371_1364_1434_1322_1339_1043_1.7546_PLA2	107	D	E	0.476	0.184	0.043	0.773	0.555111
N.mossambica_1296_1371_1364_1434_1322_1339_1043_1.7546_PLA2	108	A	E	0.638	0.257	0.016	0.727	0.562778
N.mossambica_1296_1371_1364_1434_1322_1339_1043_1.7546_PLA2	109	N	E	0.368	0.257	0.016	0.727	0.567111
N.mossambica_1296_1371_1364_1434_1322_1339_1043_1.7546_PLA2	110	Y	E	0.199	0.257	0.016	0.727	0.588444
N.mossambica_1296_1371_1364_1434_1322_1339_1043_1.7546_PLA2	111	N	E	0.497	0.113	0.043	0.844	0.612778
N.mossambica_1296_1371_1364_1434_1322_1339_1043_1.7546_PLA2	112	V	E	0.227	0.058	0.017	0.925	0.613111
N.mossambica_1296_1371_1364_1434_1322_1339_1043_1.7546_PLA2	113	N	E	0.345	0.018	0.019	0.964	0.609222
N.mossambica_1296_1371_1364_1434_1322_1339_1043_1.7546_PLA2	114	L	E	0.527	0.016	0.005	0.979	0.596556
N.mossambica_1296_1371_1364_1434_1322_1339_1043_1.7546_PLA2	115	K	E	0.566	0.053	0.005	0.942	0.6
N.mossambica_1296_1371_1364_1434_1322_1339_1043_1.7546_PLA2	116	E	E	0.569	0.016	0.005	0.979	0.528556
N.mossambica_1296_1371_1364_1434_1322_1339_1043_1.7546_PLA2	117	R	B	0.445	0.053	0.005	0.942	0.468111
N.mossambica_1296_1371_1364_1434_1322_1339_1043_1.7546_PLA2	118	C	B	0.076	0.018	0.019	0.964	0.399222
N.mossambica_1296_1371_1364_1434_1322_1339_1043_1.7546_PLA2	119	Q	B	0.721	0.003	0.003	0.994	0.323778
N.mossambica_1842_2249_1387_2278_1462_1062_1333_1413_1420_2090_4.4331_PLA2	1	L	B	0.484	0.003	0.003	0.994	0.260222
N.mossambica_1842_2249_1387_2278_1462_1062_1333_1413_1420_2090_4.4331_PLA2	2	N	B	0.373	0.053	0.043	0.903	0.304111
N.mossambica_1842_2249_1387_2278_1462_1062_1333_1413_1420_2090_4.4331_PLA2	3	L	B	0.218	0.879	0.01	0.111	0.369889
N.mossambica_1842_2249_1387_2278_1462_1062_1333_1413_1420_2090_4.4331_PLA2	4	Y	B	0.255	0.879	0.01	0.111	0.421778
N.mossambica_1842_2249_1387_2278_1462_1062_1333_1413_1420_2090_4.4331_PLA2	5	Q	B	0.261	0.879	0.01	0.111	0.456667
N.mossambica_1842_2249_1387_2278_1462_1062_1333_1413_1420_2090_4.4331_PLA2	6	F	B	0.058	0.938	0.007	0.055	0.457
N.mossambica_1842_2249_1387_2278_1462_1062_1333_1413_1420_2090_4.4331_PLA2	7	K	B	0.252	0.923	0.002	0.076	0.476333
N.mossambica_1842_2249_1387_2278_1462_1062_1333_1413_1420_2090_4.4331_PLA2	8	N	B	0.387	0.923	0.002	0.076	0.468222
N.mossambica_1842_2249_1387_2278_1462_1062_1333_1413_1420_2090_4.4331_PLA2	9	M	B	0.056	0.923	0.002	0.076	0.459333
N.mossambica_1842_2249_1387_2278_1462_1062_1333_1413_1420_2090_4.4331_PLA2	10	I	B	0.034	0.938	0.007	0.055	0.431667
N.mossambica_1842_2249_1387_2278_1462_1062_1333_1413_1420_2090_4.4331_PLA2	11	H	B	0.346	0.879	0.01	0.111	0.455778
N.mossambica_1842_2249_1387_2278_1462_1062_1333_1413_1420_2090_4.4331_PLA2	12	C	B	0.2	0.879	0.01	0.111	0.447222
N.mossambica_1842_2249_1387_2278_1462_1062_1333_1413_1420_2090_4.4331_PLA2	13	T	B	0.142	0.717	0.014	0.269	0.460778
N.mossambica_1842_2249_1387_2278_1462_1062_1333_1413_1420_2090_4.4331_PLA2	14	V	B	0.126	0.257	0.016	0.727	0.484111
N.mossambica_1842_2249_1387_2278_1462_1062_1333_1413_1420_2090_4.4331_PLA2	15	P	E	0.481	0.058	0.017	0.925	0.500444
N.mossambica_1842_2249_1387_2278_1462_1062_1333_1413_1420_2090_4.4331_PLA2	16	S	B	0.489	0.018	0.019	0.964	0.498778
N.mossambica_1842_2249_1387_2278_1462_1062_1333_1413_1420_2090_4.4331_PLA2	17	R	E	0.289	0.018	0.019	0.964	0.509556
N.mossambica_1842_2249_1387_2278_1462_1062_1333_1413_1420_2090_4.4331_PLA2	18	P	E	0.113	0.058	0.017	0.925	0.509333
N.mossambica_1842_2249_1387_2278_1462_1062_1333_1413_1420_2090_4.4331_PLA2	19	W	E	0.109	0.339	0.016	0.645	0.526667
N.mossambica_1842_2249_1387_2278_1462_1062_1333_1413_1420_2090_4.4331_PLA2	20	W	E	0.212	0.354	0.048	0.598	0.515667
N.mossambica_1842_2249_1387_2278_1462_1062_1333_1413_1420_2090_4.4331_PLA2	21	H	E	0.252	0.386	0.097	0.517	0.511667
N.mossambica_1842_2249_1387_2278_1462_1062_1333_1413_1420_2090_4.4331_PLA2	22	F	B	0.076	0.428	0.171	0.402	0.497889
N.mossambica_1842_2249_1387_2278_1462_1062_1333_1413_1420_2090_4.4331_PLA2	23	A	B	0.303	0.278	0.093	0.628	0.481444
N.mossambica_1842_2249_1387_2278_1462_1062_1333_1413_1420_2090_4.4331_PLA2	24	D	B	0.415	0.191	0.086	0.723	0.484444
N.mossambica_1842_2249_1387_2278_1462_1062_1333_1413_1420_2090_4.4331_PLA2	25	Y	B	0.059	0.052	0.084	0.864	0.466
N.mossambica_1842_2249_1387_2278_1462_1062_1333_1413_1420_2090_4.4331_PLA2	26	G	B	0.049	0.019	0.141	0.84	0.452
N.mossambica_1842_2249_1387_2278_1462_1062_1333_1413_1420_2090_4.4331_PLA2	27	C	B	0.03	0.022	0.359	0.619	0.468111
N.mossambica_1842_2249_1387_2278_1462_1062_1333_1413_1420_2090_4.4331_PLA2	28	Y	B	0.091	0.021	0.451	0.528	0.481667
N.mossambica_1842_2249_1387_2278_1462_1062_1333_1413_1420_2090_4.4331_PLA2	29	C	B	0.02	0.022	0.359	0.619	0.491
N.mossambica_1842_2249_1387_2278_1462_1062_1333_1413_1420_2090_4.4331_PLA2	30	G	E	0.105	0.02	0.205	0.775	0.514222
N.mossambica_1842_2249_1387_2278_1462_1062_1333_1413_1420_2090_4.4331_PLA2	31	R	E	0.317	0.019	0.141	0.84	0.541222
N.mossambica_1842_2249_1387_2278_1462_1062_1333_1413_1420_2090_4.4331_PLA2	32	G	E	0.396	0.005	0.045	0.951	0.572
N.mossambica_1842_2249_1387_2278_1462_1062_1333_1413_1420_2090_4.4331_PLA2	33	G	E	0.302	0.005	0.045	0.951	0.579111
N.mossambica_1842_2249_1387_2278_1462_1062_1333_1413_1420_2090_4.4331_PLA2	34	T	E	0.57	0.018	0.088	0.893	0.595778
N.mossambica_1842_2249_1387_2278_1462_1062_1333_1413_1420_2090_4.4331_PLA2	35	G	E	0.479	0.018	0.047	0.935	0.623556
N.mossambica_1842_2249_1387_2278_1462_1062_1333_1413_1420_2090_4.4331_PLA2	36	T	E	0.474	0.005	0.015	0.979	0.629556
N.mossambica_1842_2249_1387_2278_1462_1062_1333_1413_1420_2090_4.4331_PLA2	37	A	E	0.284	0.018	0.047	0.935	0.612111
N.mossambica_1842_2249_1387_2278_1462_1062_1333_1413_1420_2090_4.4331_PLA2	38	V	E	0.39	0.053	0.043	0.903	0.608556
N.mossambica_1842_2249_1387_2278_1462_1062_1333_1413_1420_2090_4.4331_PLA2	39	D	E	0.461	0.018	0.047	0.935	0.590222
N.mossambica_1842_2249_1387_2278_1462_1062_1333_1413_1420_2090_4.4331_PLA2	40	D	E	0.536	0.058	0.017	0.925	0.559444
N.mossambica_1842_2249_1387_2278_1462_1062_1333_1413_1420_2090_4.4331_PLA2	41	L	E	0.272	0.115	0.016	0.868	0.534444
N.mossambica_1842_2249_1387_2278_1462_1062_1333_1413_1420_2090_4.4331_PLA2	42	D	E	0.425	0.115	0.016	0.868	0.528778
N.mossambica_1842_2249_1387_2278_1462_1062_1333_1413_1420_2090_4.4331_PLA2	43	R	E	0.352	0.354	0.048	0.598	0.527556
N.mossambica_1842_2249_1387_2278_1462_1062_1333_1413_1420_2090_4.4331_PLA2	44	C	E	0.025	0.561	0.047	0.393	0.513333
N.mossambica_1842_2249_1387_2278_1462_1062_1333_1413_1420_2090_4.4331_PLA2	45	C	B	0.038	0.605	0.105	0.29	0.497111
N.mossambica_1842_2249_1387_2278_1462_1062_1333_1413_1420_2090_4.4331_PLA2	46	Q	B	0.418	0.605	0.105	0.29	0.499444
N.mossambica_1842_2249_1387_2278_1462_1062_1333_1413_1420_2090_4.4331_PLA2	47	V	B	0.461	0.455	0.046	0.498	0.477667
N.mossambica_1842_2249_1387_2278_1462_1062_1333_1413_1420_2090_4.4331_PLA2	48	H	B	0.155	0.181	0.016	0.803	0.474778
N.mossambica_1842_2249_1387_2278_1462_1062_1333_1413_1420_2090_4.4331_PLA2	49	D	B	0.598	0.058	0.017	0.925	0.476889
N.mossambica_1842_2249_1387_2278_1462_1062_1333_1413_1420_2090_4.4331_PLA2	50	N	B	0.288	0.257	0.016	0.727	0.477556
N.mossambica_1842_2249_1387_2278_1462_1062_1333_1413_1420_2090_4.4331_PLA2	51	C	B	0.042	0.522	0.016	0.462	0.464222
N.mossambica_1842_2249_1387_2278_1462_1062_1333_1413_1420_2090_4.4331_PLA2	52	Y	B	0.146	0.879	0.01	0.111	0.473111
N.mossambica_1842_2249_1387_2278_1462_1062_1333_1413_1420_2090_4.4331_PLA2	53	G	B	0.62	0.858	0.002	0.139	0.470444
N.mossambica_1842_2249_1387_2278_1462_1062_1333_1413_1420_2090_4.4331_PLA2	54	E	B	0.402	0.879	0.01	0.111	0.481222
N.mossambica_1842_2249_1387_2278_1462_1062_1333_1413_1420_2090_4.4331_PLA2	55	A	B	0.037	0.782	0.003	0.216	0.486
N.mossambica_1842_2249_1387_2278_1462_1062_1333_1413_1420_2090_4.4331_PLA2	56	E	B	0.542	0.717	0.014	0.269	0.487667
N.mossambica_1842_2249_1387_2278_1462_1062_1333_1413_1420_2090_4.4331_PLA2	57	K	B	0.744	0.43	0.016	0.555	0.495111
N.mossambica_1842_2249_1387_2278_1462_1062_1333_1413_1420_2090_4.4331_PLA2	58	L	E	0.409	0.053	0.005	0.942	0.506889
N.mossambica_1842_2249_1387_2278_1462_1062_1333_1413_1420_2090_4.4331_PLA2	59	G	E	0.519	0.018	0.019	0.964	0.522667
N.mossambica_1842_2249_1387_2278_1462_1062_1333_1413_1420_2090_4.4331_PLA2	60	C	E	0.082	0.018	0.047	0.935	0.539444
N.mossambica_1842_2249_1387_2278_1462_1062_1333_1413_1420_2090_4.4331_PLA2	61	W	E	0.273	0.018	0.088	0.893	0.532222
N.mossambica_1842_2249_1387_2278_1462_1062_1333_1413_1420_2090_4.4331_PLA2	62	P	E	0.333	0.004	0.197	0.799	0.529889
N.mossambica_1842_2249_1387_2278_1462_1062_1333_1413_1420_2090_4.4331_PLA2	63	Y	E	0.393	0.005	0.262	0.733	0.517556
N.mossambica_1842_2249_1387_2278_1462_1062_1333_1413_1420_2090_4.4331_PLA2	64	L	E	0.195	0.004	0.42	0.576	0.512333
N.mossambica_1842_2249_1387_2278_1462_1062_1333_1413_1420_2090_4.4331_PLA2	65	T	E	0.4	0.004	0.42	0.576	0.519444
N.mossambica_1842_2249_1387_2278_1462_1062_1333_1413_1420_2090_4.4331_PLA2	66	L	B	0.421	0.004	0.616	0.381	0.497
N.mossambica_1842_2249_1387_2278_1462_1062_1333_1413_1420_2090_4.4331_PLA2	67	Y	B	0.095	0.003	0.718	0.279	0.477444
N.mossambica_1842_2249_1387_2278_1462_1062_1333_1413_1420_2090_4.4331_PLA2	68	K	B	0.441	0.002	0.816	0.182	0.47
N.mossambica_1842_2249_1387_2278_1462_1062_1333_1413_1420_2090_4.4331_PLA2	69	Y	B	0.097	0.011	0.918	0.071	0.461778
N.mossambica_1842_2249_1387_2278_1462_1062_1333_1413_1420_2090_4.4331_PLA2	70	E	B	0.415	0.011	0.918	0.071	0.460333
N.mossambica_1842_2249_1387_2278_1462_1062_1333_1413_1420_2090_4.4331_PLA2	71	C	B	0.152	0.001	0.959	0.04	0.462222
N.mossambica_1842_2249_1387_2278_1462_1062_1333_1413_1420_2090_4.4331_PLA2	72	S	B	0.546	0.002	0.816	0.182	0.449111
N.mossambica_1842_2249_1387_2278_1462_1062_1333_1413_1420_2090_4.4331_PLA2	73	Q	B	0.723	0.005	0.045	0.951	0.446
N.mossambica_1842_2249_1387_2278_1462_1062_1333_1413_1420_2090_4.4331_PLA2	74	G	B	0.528	0.005	0.015	0.979	0.425
N.mossambica_1842_2249_1387_2278_1462_1062_1333_1413_1420_2090_4.4331_PLA2	75	K	B	0.555	0.004	0.616	0.381	0.440667
N.mossambica_1842_2249_1387_2278_1462_1062_1333_1413_1420_2090_4.4331_PLA2	76	L	B	0.057	0.001	0.9	0.099	0.46
N.mossambica_1842_2249_1387_2278_1462_1062_1333_1413_1420_2090_4.4331_PLA2	77	T	B	0.388	0.001	0.9	0.099	0.469333
N.mossambica_1842_2249_1387_2278_1462_1062_1333_1413_1420_2090_4.4331_PLA2	78	C	B	0.037	0.002	0.816	0.182	0.483222
N.mossambica_1842_2249_1387_2278_1462_1062_1333_1413_1420_2090_4.4331_PLA2	79	S	B	0.492	0.005	0.336	0.66	0.488556
N.mossambica_1842_2249_1387_2278_1462_1062_1333_1413_1420_2090_4.4331_PLA2	80	G	B	0.572	0.005	0.045	0.951	0.490889
N.mossambica_1842_2249_1387_2278_1462_1062_1333_1413_1420_2090_4.4331_PLA2	81	G	B	0.664	0.003	0.003	0.994	0.496444
N.mossambica_1842_2249_1387_2278_1462_1062_1333_1413_1420_2090_4.4331_PLA2	82	N	E	0.616	0.053	0.005	0.942	0.501556
N.mossambica_1842_2249_1387_2278_1462_1062_1333_1413_1420_2090_4.4331_PLA2	83	N	E	0.571	0.321	0.003	0.675	0.522444
N.mossambica_1842_2249_1387_2278_1462_1062_1333_1413_1420_2090_4.4331_PLA2	84	K	E	0.454	0.782	0.003	0.216	0.512111
N.mossambica_1842_2249_1387_2278_1462_1062_1333_1413_1420_2090_4.4331_PLA2	85	C	B	0.041	0.782	0.003	0.216	0.495889
N.mossambica_1842_2249_1387_2278_1462_1062_1333_1413_1420_2090_4.4331_PLA2	86	Q	B	0.257	0.879	0.01	0.111	0.472222
N.mossambica_1842_2249_1387_2278_1462_1062_1333_1413_1420_2090_4.4331_PLA2	87	A	B	0.519	0.879	0.01	0.111	0.462444
N.mossambica_1842_2249_1387_2278_1462_1062_1333_1413_1420_2090_4.4331_PLA2	88	A	B	0.284	0.879	0.01	0.111	0.425667
N.mossambica_1842_2249_1387_2278_1462_1062_1333_1413_1420_2090_4.4331_PLA2	89	V	B	0.129	0.879	0.01	0.111	0.415444
N.mossambica_1842_2249_1387_2278_1462_1062_1333_1413_1420_2090_4.4331_PLA2	90	C	B	0.069	0.802	0.014	0.185	0.421333
N.mossambica_1842_2249_1387_2278_1462_1062_1333_1413_1420_2090_4.4331_PLA2	91	N	B	0.494	0.879	0.01	0.111	0.417556
N.mossambica_1842_2249_1387_2278_1462_1062_1333_1413_1420_2090_4.4331_PLA2	92	C	B	0.042	0.782	0.003	0.216	0.401333
N.mossambica_1842_2249_1387_2278_1462_1062_1333_1413_1420_2090_4.4331_PLA2	93	D	B	0.141	0.858	0.002	0.139	0.390444
N.mossambica_1842_2249_1387_2278_1462_1062_1333_1413_1420_2090_4.4331_PLA2	94	L	B	0.369	0.97	0.001	0.03	0.394111
N.mossambica_1842_2249_1387_2278_1462_1062_1333_1413_1420_2090_4.4331_PLA2	95	V	B	0.293	0.97	0.001	0.03	0.386222
N.mossambica_1842_2249_1387_2278_1462_1062_1333_1413_1420_2090_4.4331_PLA2	96	A	B	0.031	0.97	0.001	0.03	0.378556
N.mossambica_1842_2249_1387_2278_1462_1062_1333_1413_1420_2090_4.4331_PLA2	97	A	B	0.054	0.97	0.001	0.03	0.407889
N.mossambica_1842_2249_1387_2278_1462_1062_1333_1413_1420_2090_4.4331_PLA2	98	N	B	0.335	0.923	0.002	0.076	0.424444
N.mossambica_1842_2249_1387_2278_1462_1062_1333_1413_1420_2090_4.4331_PLA2	99	C	B	0.03	0.858	0.002	0.139	0.428667
N.mossambica_1842_2249_1387_2278_1462_1062_1333_1413_1420_2090_4.4331_PLA2	100	F	B	0.059	0.694	0.003	0.303	0.431556
N.mossambica_1842_2249_1387_2278_1462_1062_1333_1413_1420_2090_4.4331_PLA2	101	A	B	0.352	0.406	0.004	0.59	0.451222
N.mossambica_1842_2249_1387_2278_1462_1062_1333_1413_1420_2090_4.4331_PLA2	102	G	B	0.623	0.246	0.004	0.75	0.467444
N.mossambica_1842_2249_1387_2278_1462_1062_1333_1413_1420_2090_4.4331_PLA2	103	A	B	0.162	0.053	0.005	0.942	0.489333
N.mossambica_1842_2249_1387_2278_1462_1062_1333_1413_1420_2090_4.4331_PLA2	104	P	E	0.566	0.018	0.019	0.964	0.517667
N.mossambica_1842_2249_1387_2278_1462_1062_1333_1413_1420_2090_4.4331_PLA2	105	Y	E	0.245	0.018	0.019	0.964	0.530444
N.mossambica_1842_2249_1387_2278_1462_1062_1333_1413_1420_2090_4.4331_PLA2	106	I	E	0.233	0.053	0.043	0.903	0.539222
N.mossambica_1842_2249_1387_2278_1462_1062_1333_1413_1420_2090_4.4331_PLA2	107	D	E	0.495	0.184	0.043	0.773	0.547667
N.mossambica_1842_2249_1387_2278_1462_1062_1333_1413_1420_2090_4.4331_PLA2	108	A	E	0.594	0.339	0.016	0.645	0.550889
N.mossambica_1842_2249_1387_2278_1462_1062_1333_1413_1420_2090_4.4331_PLA2	109	N	E	0.314	0.257	0.016	0.727	0.563889
N.mossambica_1842_2249_1387_2278_1462_1062_1333_1413_1420_2090_4.4331_PLA2	110	Y	E	0.19	0.268	0.043	0.689	0.586222
N.mossambica_1842_2249_1387_2278_1462_1062_1333_1413_1420_2090_4.4331_PLA2	111	N	E	0.468	0.184	0.043	0.773	0.610222
N.mossambica_1842_2249_1387_2278_1462_1062_1333_1413_1420_2090_4.4331_PLA2	112	V	E	0.184	0.113	0.043	0.844	0.610333
N.mossambica_1842_2249_1387_2278_1462_1062_1333_1413_1420_2090_4.4331_PLA2	113	N	E	0.397	0.058	0.017	0.925	0.611444
N.mossambica_1842_2249_1387_2278_1462_1062_1333_1413_1420_2090_4.4331_PLA2	114	L	E	0.531	0.016	0.005	0.979	0.598667
N.mossambica_1842_2249_1387_2278_1462_1062_1333_1413_1420_2090_4.4331_PLA2	115	K	E	0.569	0.016	0.005	0.979	0.599556
N.mossambica_1842_2249_1387_2278_1462_1062_1333_1413_1420_2090_4.4331_PLA2	116	E	E	0.556	0.016	0.005	0.979	0.527222
N.mossambica_1842_2249_1387_2278_1462_1062_1333_1413_1420_2090_4.4331_PLA2	117	R	B	0.413	0.016	0.005	0.979	0.467556
N.mossambica_1842_2249_1387_2278_1462_1062_1333_1413_1420_2090_4.4331_PLA2	118	C	B	0.072	0.018	0.019	0.964	0.397889
N.mossambica_1842_2249_1387_2278_1462_1062_1333_1413_1420_2090_4.4331_PLA2	119	Q	B	0.726	0.003	0.003	0.994	0.322444
N.mossambica_1851_2222_931_1483_1321_2417_1416_974_1057_0.4912_PLA2	1	N	B	0.702	0.003	0.003	0.994	0.251222
N.mossambica_1851_2222_931_1483_1321_2417_1416_974_1057_0.4912_PLA2	2	L	B	0.254	0.782	0.003	0.216	0.316556
N.mossambica_1851_2222_931_1483_1321_2417_1416_974_1057_0.4912_PLA2	3	Y	B	0.278	0.858	0.002	0.139	0.368111
N.mossambica_1851_2222_931_1483_1321_2417_1416_974_1057_0.4912_PLA2	4	Q	B	0.335	0.879	0.01	0.111	0.404111
N.mossambica_1851_2222_931_1483_1321_2417_1416_974_1057_0.4912_PLA2	5	F	B	0.058	0.938	0.007	0.055	0.437778
N.mossambica_1851_2222_931_1483_1321_2417_1416_974_1057_0.4912_PLA2	6	K	B	0.228	0.938	0.007	0.055	0.462556
N.mossambica_1851_2222_931_1483_1321_2417_1416_974_1057_0.4912_PLA2	7	N	B	0.411	0.923	0.002	0.076	0.457889
N.mossambica_1851_2222_931_1483_1321_2417_1416_974_1057_0.4912_PLA2	8	M	B	0.06	0.97	0.001	0.03	0.449111
N.mossambica_1851_2222_931_1483_1321_2417_1416_974_1057_0.4912_PLA2	9	I	B	0.037	0.938	0.007	0.055	0.433
N.mossambica_1851_2222_931_1483_1321_2417_1416_974_1057_0.4912_PLA2	10	H	B	0.36	0.938	0.007	0.055	0.456111
N.mossambica_1851_2222_931_1483_1321_2417_1416_974_1057_0.4912_PLA2	11	C	B	0.201	0.879	0.01	0.111	0.449222
N.mossambica_1851_2222_931_1483_1321_2417_1416_974_1057_0.4912_PLA2	12	T	B	0.138	0.717	0.014	0.269	0.461
N.mossambica_1851_2222_931_1483_1321_2417_1416_974_1057_0.4912_PLA2	13	V	B	0.114	0.339	0.016	0.645	0.479556
N.mossambica_1851_2222_931_1483_1321_2417_1416_974_1057_0.4912_PLA2	14	P	B	0.438	0.058	0.017	0.925	0.496
N.mossambica_1851_2222_931_1483_1321_2417_1416_974_1057_0.4912_PLA2	15	S	B	0.407	0.018	0.019	0.964	0.497111
N.mossambica_1851_2222_931_1483_1321_2417_1416_974_1057_0.4912_PLA2	16	R	E	0.277	0.018	0.019	0.964	0.505
N.mossambica_1851_2222_931_1483_1321_2417_1416_974_1057_0.4912_PLA2	17	P	E	0.082	0.115	0.016	0.868	0.507444
N.mossambica_1851_2222_931_1483_1321_2417_1416_974_1057_0.4912_PLA2	18	W	E	0.12	0.339	0.016	0.645	0.526333
N.mossambica_1851_2222_931_1483_1321_2417_1416_974_1057_0.4912_PLA2	19	W	E	0.217	0.354	0.048	0.598	0.519111
N.mossambica_1851_2222_931_1483_1321_2417_1416_974_1057_0.4912_PLA2	20	H	E	0.23	0.386	0.097	0.517	0.513444
N.mossambica_1851_2222_931_1483_1321_2417_1416_974_1057_0.4912_PLA2	21	F	E	0.071	0.386	0.097	0.517	0.501556
N.mossambica_1851_2222_931_1483_1321_2417_1416_974_1057_0.4912_PLA2	22	A	B	0.279	0.278	0.093	0.628	0.489444
N.mossambica_1851_2222_931_1483_1321_2417_1416_974_1057_0.4912_PLA2	23	D	B	0.366	0.191	0.086	0.723	0.491667
N.mossambica_1851_2222_931_1483_1321_2417_1416_974_1057_0.4912_PLA2	24	Y	B	0.053	0.052	0.084	0.864	0.472333
N.mossambica_1851_2222_931_1483_1321_2417_1416_974_1057_0.4912_PLA2	25	G	B	0.047	0.019	0.141	0.84	0.462222
N.mossambica_1851_2222_931_1483_1321_2417_1416_974_1057_0.4912_PLA2	26	C	B	0.028	0.022	0.359	0.619	0.469556
N.mossambica_1851_2222_931_1483_1321_2417_1416_974_1057_0.4912_PLA2	27	Y	B	0.086	0.021	0.451	0.528	0.472333
N.mossambica_1851_2222_931_1483_1321_2417_1416_974_1057_0.4912_PLA2	28	C	B	0.021	0.022	0.359	0.619	0.470889
N.mossambica_1851_2222_931_1483_1321_2417_1416_974_1057_0.4912_PLA2	29	G	B	0.102	0.02	0.205	0.775	0.497778
N.mossambica_1851_2222_931_1483_1321_2417_1416_974_1057_0.4912_PLA2	30	R	E	0.29	0.018	0.088	0.893	0.523333
N.mossambica_1851_2222_931_1483_1321_2417_1416_974_1057_0.4912_PLA2	31	G	E	0.381	0.005	0.045	0.951	0.556333
N.mossambica_1851_2222_931_1483_1321_2417_1416_974_1057_0.4912_PLA2	32	G	E	0.262	0.005	0.045	0.951	0.570444
N.mossambica_1851_2222_931_1483_1321_2417_1416_974_1057_0.4912_PLA2	33	K	E	0.568	0.018	0.047	0.935	0.588889
N.mossambica_1851_2222_931_1483_1321_2417_1416_974_1057_0.4912_PLA2	34	G	E	0.455	0.018	0.047	0.935	0.618667
N.mossambica_1851_2222_931_1483_1321_2417_1416_974_1057_0.4912_PLA2	35	T	E	0.401	0.005	0.045	0.951	0.629556
N.mossambica_1851_2222_931_1483_1321_2417_1416_974_1057_0.4912_PLA2	36	A	E	0.299	0.018	0.047	0.935	0.619889
N.mossambica_1851_2222_931_1483_1321_2417_1416_974_1057_0.4912_PLA2	37	V	E	0.401	0.053	0.043	0.903	0.621778
N.mossambica_1851_2222_931_1483_1321_2417_1416_974_1057_0.4912_PLA2	38	D	E	0.441	0.053	0.043	0.903	0.599222
N.mossambica_1851_2222_931_1483_1321_2417_1416_974_1057_0.4912_PLA2	39	D	E	0.475	0.113	0.043	0.844	0.567556
N.mossambica_1851_2222_931_1483_1321_2417_1416_974_1057_0.4912_PLA2	40	L	E	0.27	0.184	0.043	0.773	0.536889
N.mossambica_1851_2222_931_1483_1321_2417_1416_974_1057_0.4912_PLA2	41	D	E	0.319	0.184	0.043	0.773	0.525333
N.mossambica_1851_2222_931_1483_1321_2417_1416_974_1057_0.4912_PLA2	42	R	E	0.355	0.354	0.048	0.598	0.523667
N.mossambica_1851_2222_931_1483_1321_2417_1416_974_1057_0.4912_PLA2	43	C	E	0.037	0.502	0.102	0.396	0.505444
N.mossambica_1851_2222_931_1483_1321_2417_1416_974_1057_0.4912_PLA2	44	C	B	0.04	0.538	0.173	0.289	0.489111
N.mossambica_1851_2222_931_1483_1321_2417_1416_974_1057_0.4912_PLA2	45	Q	B	0.34	0.428	0.171	0.402	0.491222
N.mossambica_1851_2222_931_1483_1321_2417_1416_974_1057_0.4912_PLA2	46	V	B	0.413	0.191	0.086	0.723	0.472222
N.mossambica_1851_2222_931_1483_1321_2417_1416_974_1057_0.4912_PLA2	47	H	B	0.153	0.053	0.043	0.903	0.470889
N.mossambica_1851_2222_931_1483_1321_2417_1416_974_1057_0.4912_PLA2	48	D	B	0.617	0.058	0.017	0.925	0.473444
N.mossambica_1851_2222_931_1483_1321_2417_1416_974_1057_0.4912_PLA2	49	N	B	0.246	0.181	0.016	0.803	0.473556
N.mossambica_1851_2222_931_1483_1321_2417_1416_974_1057_0.4912_PLA2	50	C	B	0.044	0.522	0.016	0.462	0.458667
N.mossambica_1851_2222_931_1483_1321_2417_1416_974_1057_0.4912_PLA2	51	Y	B	0.147	0.858	0.002	0.139	0.463778
N.mossambica_1851_2222_931_1483_1321_2417_1416_974_1057_0.4912_PLA2	52	G	B	0.606	0.858	0.002	0.139	0.462778
N.mossambica_1851_2222_931_1483_1321_2417_1416_974_1057_0.4912_PLA2	53	E	B	0.435	0.858	0.002	0.139	0.474778
N.mossambica_1851_2222_931_1483_1321_2417_1416_974_1057_0.4912_PLA2	54	A	B	0.042	0.782	0.003	0.216	0.480333
N.mossambica_1851_2222_931_1483_1321_2417_1416_974_1057_0.4912_PLA2	55	E	B	0.571	0.694	0.003	0.303	0.483
N.mossambica_1851_2222_931_1483_1321_2417_1416_974_1057_0.4912_PLA2	56	K	B	0.739	0.502	0.002	0.495	0.491778
N.mossambica_1851_2222_931_1483_1321_2417_1416_974_1057_0.4912_PLA2	57	L	E	0.428	0.109	0.005	0.886	0.506667
N.mossambica_1851_2222_931_1483_1321_2417_1416_974_1057_0.4912_PLA2	58	G	E	0.537	0.018	0.019	0.964	0.527333
N.mossambica_1851_2222_931_1483_1321_2417_1416_974_1057_0.4912_PLA2	59	C	E	0.132	0.018	0.047	0.935	0.547333
N.mossambica_1851_2222_931_1483_1321_2417_1416_974_1057_0.4912_PLA2	60	W	E	0.278	0.004	0.085	0.91	0.543444
N.mossambica_1851_2222_931_1483_1321_2417_1416_974_1057_0.4912_PLA2	61	P	E	0.39	0.004	0.197	0.799	0.540889
N.mossambica_1851_2222_931_1483_1321_2417_1416_974_1057_0.4912_PLA2	62	Y	E	0.406	0.005	0.336	0.66	0.525889
N.mossambica_1851_2222_931_1483_1321_2417_1416_974_1057_0.4912_PLA2	63	L	E	0.218	0.004	0.42	0.576	0.518778
N.mossambica_1851_2222_931_1483_1321_2417_1416_974_1057_0.4912_PLA2	64	T	E	0.441	0.004	0.42	0.576	0.521444
N.mossambica_1851_2222_931_1483_1321_2417_1416_974_1057_0.4912_PLA2	65	L	B	0.428	0.004	0.514	0.481	0.497111
N.mossambica_1851_2222_931_1483_1321_2417_1416_974_1057_0.4912_PLA2	66	Y	B	0.09	0.004	0.616	0.381	0.476889
N.mossambica_1851_2222_931_1483_1321_2417_1416_974_1057_0.4912_PLA2	67	K	B	0.429	0.002	0.816	0.182	0.465778
N.mossambica_1851_2222_931_1483_1321_2417_1416_974_1057_0.4912_PLA2	68	Y	B	0.089	0.011	0.918	0.071	0.454778
N.mossambica_1851_2222_931_1483_1321_2417_1416_974_1057_0.4912_PLA2	69	E	B	0.437	0.011	0.918	0.071	0.453556
N.mossambica_1851_2222_931_1483_1321_2417_1416_974_1057_0.4912_PLA2	70	C	B	0.158	0.001	0.9	0.099	0.454889
N.mossambica_1851_2222_931_1483_1321_2417_1416_974_1057_0.4912_PLA2	71	S	B	0.572	0.002	0.816	0.182	0.446111
N.mossambica_1851_2222_931_1483_1321_2417_1416_974_1057_0.4912_PLA2	72	Q	B	0.732	0.005	0.045	0.951	0.444778
N.mossambica_1851_2222_931_1483_1321_2417_1416_974_1057_0.4912_PLA2	73	G	B	0.45	0.005	0.015	0.979	0.424778
N.mossambica_1851_2222_931_1483_1321_2417_1416_974_1057_0.4912_PLA2	74	K	B	0.533	0.004	0.616	0.381	0.438
N.mossambica_1851_2222_931_1483_1321_2417_1416_974_1057_0.4912_PLA2	75	L	B	0.047	0.002	0.816	0.182	0.454
N.mossambica_1851_2222_931_1483_1321_2417_1416_974_1057_0.4912_PLA2	76	T	B	0.379	0.001	0.9	0.099	0.464222
N.mossambica_1851_2222_931_1483_1321_2417_1416_974_1057_0.4912_PLA2	77	C	B	0.03	0.002	0.816	0.182	0.476778
N.mossambica_1851_2222_931_1483_1321_2417_1416_974_1057_0.4912_PLA2	78	S	B	0.491	0.005	0.262	0.733	0.480444
N.mossambica_1851_2222_931_1483_1321_2417_1416_974_1057_0.4912_PLA2	79	G	B	0.612	0.005	0.045	0.951	0.482556
N.mossambica_1851_2222_931_1483_1321_2417_1416_974_1057_0.4912_PLA2	80	G	B	0.663	0.003	0.003	0.994	0.487111
N.mossambica_1851_2222_931_1483_1321_2417_1416_974_1057_0.4912_PLA2	81	N	B	0.648	0.053	0.005	0.942	0.489889
N.mossambica_1851_2222_931_1483_1321_2417_1416_974_1057_0.4912_PLA2	82	N	E	0.579	0.246	0.004	0.75	0.511444
N.mossambica_1851_2222_931_1483_1321_2417_1416_974_1057_0.4912_PLA2	83	K	E	0.447	0.782	0.003	0.216	0.502778
N.mossambica_1851_2222_931_1483_1321_2417_1416_974_1057_0.4912_PLA2	84	C	B	0.035	0.782	0.003	0.216	0.481111
N.mossambica_1851_2222_931_1483_1321_2417_1416_974_1057_0.4912_PLA2	85	E	B	0.233	0.858	0.002	0.139	0.460667
N.mossambica_1851_2222_931_1483_1321_2417_1416_974_1057_0.4912_PLA2	86	A	B	0.506	0.938	0.007	0.055	0.455
N.mossambica_1851_2222_931_1483_1321_2417_1416_974_1057_0.4912_PLA2	87	A	B	0.259	0.923	0.002	0.076	0.418667
N.mossambica_1851_2222_931_1483_1321_2417_1416_974_1057_0.4912_PLA2	88	V	B	0.085	0.923	0.002	0.076	0.407778
N.mossambica_1851_2222_931_1483_1321_2417_1416_974_1057_0.4912_PLA2	89	C	B	0.069	0.923	0.002	0.076	0.412556
N.mossambica_1851_2222_931_1483_1321_2417_1416_974_1057_0.4912_PLA2	90	N	B	0.509	0.923	0.002	0.076	0.411333
N.mossambica_1851_2222_931_1483_1321_2417_1416_974_1057_0.4912_PLA2	91	C	B	0.041	0.858	0.002	0.139	0.395889
N.mossambica_1851_2222_931_1483_1321_2417_1416_974_1057_0.4912_PLA2	92	D	B	0.121	0.923	0.002	0.076	0.386
N.mossambica_1851_2222_931_1483_1321_2417_1416_974_1057_0.4912_PLA2	93	L	B	0.354	0.97	0.001	0.03	0.396444
N.mossambica_1851_2222_931_1483_1321_2417_1416_974_1057_0.4912_PLA2	94	V	B	0.309	0.988	0	0.012	0.385444
N.mossambica_1851_2222_931_1483_1321_2417_1416_974_1057_0.4912_PLA2	95	A	B	0.028	0.988	0	0.012	0.369778
N.mossambica_1851_2222_931_1483_1321_2417_1416_974_1057_0.4912_PLA2	96	A	B	0.043	0.97	0.001	0.03	0.390111
N.mossambica_1851_2222_931_1483_1321_2417_1416_974_1057_0.4912_PLA2	97	N	B	0.33	0.97	0.001	0.03	0.402333
N.mossambica_1851_2222_931_1483_1321_2417_1416_974_1057_0.4912_PLA2	98	C	B	0.031	0.923	0.002	0.076	0.406333
N.mossambica_1851_2222_931_1483_1321_2417_1416_974_1057_0.4912_PLA2	99	F	B	0.052	0.858	0.002	0.139	0.408333
N.mossambica_1851_2222_931_1483_1321_2417_1416_974_1057_0.4912_PLA2	100	A	B	0.339	0.694	0.003	0.303	0.430444
N.mossambica_1851_2222_931_1483_1321_2417_1416_974_1057_0.4912_PLA2	101	G	B	0.603	0.502	0.002	0.495	0.447111
N.mossambica_1851_2222_931_1483_1321_2417_1416_974_1057_0.4912_PLA2	102	A	B	0.149	0.109	0.005	0.886	0.470667
N.mossambica_1851_2222_931_1483_1321_2417_1416_974_1057_0.4912_PLA2	103	P	E	0.562	0.058	0.017	0.925	0.500778
N.mossambica_1851_2222_931_1483_1321_2417_1416_974_1057_0.4912_PLA2	104	Y	E	0.207	0.018	0.047	0.935	0.519111
N.mossambica_1851_2222_931_1483_1321_2417_1416_974_1057_0.4912_PLA2	105	I	E	0.218	0.053	0.043	0.903	0.535111
N.mossambica_1851_2222_931_1483_1321_2417_1416_974_1057_0.4912_PLA2	106	D	E	0.533	0.184	0.043	0.773	0.546889
N.mossambica_1851_2222_931_1483_1321_2417_1416_974_1057_0.4912_PLA2	107	A	E	0.636	0.257	0.016	0.727	0.552111
N.mossambica_1851_2222_931_1483_1321_2417_1416_974_1057_0.4912_PLA2	108	N	E	0.339	0.257	0.016	0.727	0.564444
N.mossambica_1851_2222_931_1483_1321_2417_1416_974_1057_0.4912_PLA2	109	Y	E	0.2	0.257	0.016	0.727	0.583556
N.mossambica_1851_2222_931_1483_1321_2417_1416_974_1057_0.4912_PLA2	110	N	E	0.491	0.184	0.043	0.773	0.605889
N.mossambica_1851_2222_931_1483_1321_2417_1416_974_1057_0.4912_PLA2	111	V	E	0.209	0.058	0.017	0.925	0.605556
N.mossambica_1851_2222_931_1483_1321_2417_1416_974_1057_0.4912_PLA2	112	N	E	0.367	0.018	0.019	0.964	0.606
N.mossambica_1851_2222_931_1483_1321_2417_1416_974_1057_0.4912_PLA2	113	L	E	0.516	0.016	0.005	0.979	0.594778
N.mossambica_1851_2222_931_1483_1321_2417_1416_974_1057_0.4912_PLA2	114	K	E	0.538	0.016	0.005	0.979	0.597778
N.mossambica_1851_2222_931_1483_1321_2417_1416_974_1057_0.4912_PLA2	115	E	E	0.562	0.016	0.005	0.979	0.527444
N.mossambica_1851_2222_931_1483_1321_2417_1416_974_1057_0.4912_PLA2	116	R	B	0.447	0.016	0.005	0.979	0.466111
N.mossambica_1851_2222_931_1483_1321_2417_1416_974_1057_0.4912_PLA2	117	C	B	0.077	0.018	0.019	0.964	0.397111
N.mossambica_1851_2222_931_1483_1321_2417_1416_974_1057_0.4912_PLA2	118	Q	B	0.729	0.003	0.003	0.994	0.321667
N.mossambica_2269_0.324915476505541_PLA2	1	N	B	0.726	0.003	0.003	0.994	0.251667
N.mossambica_2269_0.324915476505541_PLA2	2	L	B	0.266	0.802	0.014	0.185	0.318
N.mossambica_2269_0.324915476505541_PLA2	3	Y	B	0.282	0.879	0.01	0.111	0.370556
N.mossambica_2269_0.324915476505541_PLA2	4	Q	B	0.332	0.879	0.01	0.111	0.408667
N.mossambica_2269_0.324915476505541_PLA2	5	F	B	0.058	0.938	0.007	0.055	0.443889
N.mossambica_2269_0.324915476505541_PLA2	6	K	B	0.241	0.938	0.007	0.055	0.467556
N.mossambica_2269_0.324915476505541_PLA2	7	N	B	0.389	0.938	0.007	0.055	0.465444
N.mossambica_2269_0.324915476505541_PLA2	8	M	B	0.057	0.975	0.003	0.022	0.454556
N.mossambica_2269_0.324915476505541_PLA2	9	I	B	0.032	0.938	0.007	0.055	0.434667
N.mossambica_2269_0.324915476505541_PLA2	10	Q	B	0.318	0.938	0.007	0.055	0.454444
N.mossambica_2269_0.324915476505541_PLA2	11	C	B	0.173	0.879	0.01	0.111	0.447222
N.mossambica_2269_0.324915476505541_PLA2	12	T	B	0.134	0.802	0.014	0.185	0.456778
N.mossambica_2269_0.324915476505541_PLA2	13	V	B	0.088	0.339	0.016	0.645	0.479889
N.mossambica_2269_0.324915476505541_PLA2	14	P	B	0.411	0.058	0.017	0.925	0.496
N.mossambica_2269_0.324915476505541_PLA2	15	N	B	0.632	0.016	0.005	0.979	0.496778
N.mossambica_2269_0.324915476505541_PLA2	16	R	E	0.289	0.018	0.019	0.964	0.504111
N.mossambica_2269_0.324915476505541_PLA2	17	S	E	0.111	0.016	0.005	0.979	0.509111
N.mossambica_2269_0.324915476505541_PLA2	18	W	E	0.09	0.257	0.016	0.727	0.531889
N.mossambica_2269_0.324915476505541_PLA2	19	W	E	0.227	0.268	0.043	0.689	0.525667
N.mossambica_2269_0.324915476505541_PLA2	20	D	E	0.246	0.386	0.097	0.517	0.521333
N.mossambica_2269_0.324915476505541_PLA2	21	F	E	0.079	0.386	0.097	0.517	0.510444
N.mossambica_2269_0.324915476505541_PLA2	22	A	B	0.281	0.278	0.093	0.628	0.492
N.mossambica_2269_0.324915476505541_PLA2	23	D	B	0.363	0.191	0.086	0.723	0.492556
N.mossambica_2269_0.324915476505541_PLA2	24	Y	B	0.051	0.052	0.084	0.864	0.476667
N.mossambica_2269_0.324915476505541_PLA2	25	G	B	0.044	0.019	0.141	0.84	0.463333
N.mossambica_2269_0.324915476505541_PLA2	26	C	B	0.026	0.022	0.359	0.619	0.472667
N.mossambica_2269_0.324915476505541_PLA2	27	Y	B	0.072	0.021	0.451	0.528	0.472333
N.mossambica_2269_0.324915476505541_PLA2	28	C	B	0.021	0.022	0.359	0.619	0.472778
N.mossambica_2269_0.324915476505541_PLA2	29	G	B	0.075	0.02	0.205	0.775	0.493889
N.mossambica_2269_0.324915476505541_PLA2	30	R	E	0.333	0.018	0.088	0.893	0.517333
N.mossambica_2269_0.324915476505541_PLA2	31	G	E	0.283	0.005	0.015	0.979	0.545222
N.mossambica_2269_0.324915476505541_PLA2	32	G	E	0.245	0.005	0.015	0.979	0.559778
N.mossambica_2269_0.324915476505541_PLA2	33	S	E	0.6	0.018	0.047	0.935	0.574111
N.mossambica_2269_0.324915476505541_PLA2	34	G	E	0.408	0.018	0.047	0.935	0.604444
N.mossambica_2269_0.324915476505541_PLA2	35	T	E	0.446	0.005	0.015	0.979	0.615667
N.mossambica_2269_0.324915476505541_PLA2	36	P	E	0.304	0.018	0.047	0.935	0.613333
N.mossambica_2269_0.324915476505541_PLA2	37	V	E	0.441	0.053	0.043	0.903	0.619556
N.mossambica_2269_0.324915476505541_PLA2	38	D	E	0.492	0.053	0.043	0.903	0.607667
N.mossambica_2269_0.324915476505541_PLA2	39	D	E	0.532	0.053	0.043	0.903	0.582222
N.mossambica_2269_0.324915476505541_PLA2	40	L	E	0.312	0.113	0.087	0.8	0.566
N.mossambica_2269_0.324915476505541_PLA2	41	D	E	0.321	0.191	0.086	0.723	0.560667
N.mossambica_2269_0.324915476505541_PLA2	42	R	E	0.337	0.278	0.093	0.628	0.562778
N.mossambica_2269_0.324915476505541_PLA2	43	C	E	0.04	0.278	0.093	0.628	0.546222
N.mossambica_2269_0.324915476505541_PLA2	44	C	E	0.059	0.307	0.165	0.527	0.530889
N.mossambica_2269_0.324915476505541_PLA2	45	Q	E	0.392	0.191	0.086	0.723	0.528556
N.mossambica_2269_0.324915476505541_PLA2	46	V	E	0.393	0.113	0.043	0.844	0.507111
N.mossambica_2269_0.324915476505541_PLA2	47	H	B	0.19	0.058	0.017	0.925	0.498556
N.mossambica_2269_0.324915476505541_PLA2	48	D	E	0.572	0.058	0.017	0.925	0.506222
N.mossambica_2269_0.324915476505541_PLA2	49	N	E	0.22	0.339	0.016	0.645	0.501
N.mossambica_2269_0.324915476505541_PLA2	50	C	B	0.036	0.622	0.015	0.363	0.483444
N.mossambica_2269_0.324915476505541_PLA2	51	Y	B	0.111	0.858	0.002	0.139	0.488222
N.mossambica_2269_0.324915476505541_PLA2	52	D	B	0.551	0.923	0.002	0.076	0.484556
N.mossambica_2269_0.324915476505541_PLA2	53	E	B	0.337	0.858	0.002	0.139	0.483889
N.mossambica_2269_0.324915476505541_PLA2	54	A	B	0.041	0.858	0.002	0.139	0.484333
N.mossambica_2269_0.324915476505541_PLA2	55	E	E	0.507	0.782	0.003	0.216	0.504111
N.mossambica_2269_0.324915476505541_PLA2	56	K	B	0.729	0.622	0.015	0.363	0.495778
N.mossambica_2269_0.324915476505541_PLA2	57	I	B	0.196	0.176	0.004	0.82	0.496222
N.mossambica_2269_0.324915476505541_PLA2	58	S	E	0.575	0.016	0.005	0.979	0.504333
N.mossambica_2269_0.324915476505541_PLA2	59	R	E	0.431	0.018	0.019	0.964	0.522
N.mossambica_2269_0.324915476505541_PLA2	60	C	E	0.054	0.018	0.088	0.893	0.514444
N.mossambica_2269_0.324915476505541_PLA2	61	W	E	0.252	0.004	0.138	0.858	0.525889
N.mossambica_2269_0.324915476505541_PLA2	62	P	E	0.267	0.005	0.336	0.66	0.520222
N.mossambica_2269_0.324915476505541_PLA2	63	Y	E	0.309	0.004	0.514	0.481	0.521222
N.mossambica_2269_0.324915476505541_PLA2	64	F	E	0.259	0.004	0.616	0.381	0.508444
N.mossambica_2269_0.324915476505541_PLA2	65	K	E	0.363	0.004	0.514	0.481	0.508222
N.mossambica_2269_0.324915476505541_PLA2	66	T	B	0.398	0.004	0.514	0.481	0.492
N.mossambica_2269_0.324915476505541_PLA2	67	Y	B	0.107	0.004	0.616	0.381	0.476111
N.mossambica_2269_0.324915476505541_PLA2	68	S	B	0.428	0.002	0.816	0.182	0.466778
N.mossambica_2269_0.324915476505541_PLA2	69	Y	B	0.1	0.001	0.9	0.099	0.462444
N.mossambica_2269_0.324915476505541_PLA2	70	E	B	0.418	0.011	0.918	0.071	0.452111
N.mossambica_2269_0.324915476505541_PLA2	71	C	B	0.131	0.001	0.9	0.099	0.450444
N.mossambica_2269_0.324915476505541_PLA2	72	S	B	0.569	0.003	0.718	0.279	0.436667
N.mossambica_2269_0.324915476505541_PLA2	73	Q	B	0.721	0.005	0.045	0.951	0.432667
N.mossambica_2269_0.324915476505541_PLA2	74	G	B	0.514	0.005	0.015	0.979	0.415222
N.mossambica_2269_0.324915476505541_PLA2	75	T	B	0.521	0.004	0.514	0.481	0.432667
N.mossambica_2269_0.324915476505541_PLA2	76	L	B	0.063	0.002	0.816	0.182	0.455667
N.mossambica_2269_0.324915476505541_PLA2	77	T	B	0.347	0.001	0.9	0.099	0.466
N.mossambica_2269_0.324915476505541_PLA2	78	C	B	0.037	0.002	0.816	0.182	0.470333
N.mossambica_2269_0.324915476505541_PLA2	79	K	B	0.438	0.005	0.336	0.66	0.483667
N.mossambica_2269_0.324915476505541_PLA2	80	N	B	0.678	0.004	0.085	0.91	0.494889
N.mossambica_2269_0.324915476505541_PLA2	81	G	B	0.585	0.003	0.003	0.994	0.497
N.mossambica_2269_0.324915476505541_PLA2	82	N	B	0.647	0.053	0.005	0.942	0.497778
N.mossambica_2269_0.324915476505541_PLA2	83	N	E	0.56	0.176	0.004	0.82	0.516778
N.mossambica_2269_0.324915476505541_PLA2	84	A	E	0.433	0.782	0.003	0.216	0.501111
N.mossambica_2269_0.324915476505541_PLA2	85	C	B	0.036	0.858	0.002	0.139	0.476
N.mossambica_2269_0.324915476505541_PLA2	86	A	B	0.226	0.879	0.01	0.111	0.458889
N.mossambica_2269_0.324915476505541_PLA2	87	A	B	0.498	0.938	0.007	0.055	0.457222
N.mossambica_2269_0.324915476505541_PLA2	88	A	B	0.253	0.938	0.007	0.055	0.419667
N.mossambica_2269_0.324915476505541_PLA2	89	V	B	0.093	0.923	0.002	0.076	0.404889
N.mossambica_2269_0.324915476505541_PLA2	90	C	B	0.064	0.923	0.002	0.076	0.413556
N.mossambica_2269_0.324915476505541_PLA2	91	D	B	0.461	0.923	0.002	0.076	0.420333
N.mossambica_2269_0.324915476505541_PLA2	92	C	B	0.036	0.923	0.002	0.076	0.408222
N.mossambica_2269_0.324915476505541_PLA2	93	D	B	0.111	0.923	0.002	0.076	0.399222
N.mossambica_2269_0.324915476505541_PLA2	94	R	B	0.361	0.988	0	0.012	0.411556
N.mossambica_2269_0.324915476505541_PLA2	95	L	B	0.216	0.988	0	0.012	0.403778
N.mossambica_2269_0.324915476505541_PLA2	96	A	B	0.026	0.988	0	0.012	0.387111
N.mossambica_2269_0.324915476505541_PLA2	97	A	B	0.037	0.988	0	0.012	0.407111
N.mossambica_2269_0.324915476505541_PLA2	98	I	B	0.269	0.97	0.001	0.03	0.420333
N.mossambica_2269_0.324915476505541_PLA2	99	C	B	0.02	0.97	0.001	0.03	0.419222
N.mossambica_2269_0.324915476505541_PLA2	100	F	B	0.062	0.858	0.002	0.139	0.425333
N.mossambica_2269_0.324915476505541_PLA2	101	A	B	0.337	0.694	0.003	0.303	0.447111
N.mossambica_2269_0.324915476505541_PLA2	102	G	B	0.557	0.406	0.004	0.59	0.471
N.mossambica_2269_0.324915476505541_PLA2	103	A	B	0.135	0.053	0.005	0.942	0.492222
N.mossambica_2269_0.324915476505541_PLA2	104	P	E	0.534	0.058	0.017	0.925	0.531111
N.mossambica_2269_0.324915476505541_PLA2	105	Y	E	0.241	0.053	0.043	0.903	0.564111
N.mossambica_2269_0.324915476505541_PLA2	106	N	E	0.203	0.053	0.043	0.903	0.590778
N.mossambica_2269_0.324915476505541_PLA2	107	N	E	0.522	0.268	0.043	0.689	0.602333
N.mossambica_2269_0.324915476505541_PLA2	108	N	E	0.587	0.268	0.043	0.689	0.613889
N.mossambica_2269_0.324915476505541_PLA2	109	N	E	0.338	0.257	0.016	0.727	0.618333
N.mossambica_2269_0.324915476505541_PLA2	110	Y	E	0.298	0.184	0.043	0.773	0.628556
N.mossambica_2269_0.324915476505541_PLA2	111	N	E	0.506	0.113	0.043	0.844	0.641778
N.mossambica_2269_0.324915476505541_PLA2	112	I	E	0.228	0.053	0.043	0.903	0.631222
N.mossambica_2269_0.324915476505541_PLA2	113	D	E	0.54	0.018	0.019	0.964	0.618111
N.mossambica_2269_0.324915476505541_PLA2	114	L	E	0.513	0.018	0.019	0.964	0.592444
N.mossambica_2269_0.324915476505541_PLA2	115	K	E	0.494	0.018	0.019	0.964	0.581
N.mossambica_2269_0.324915476505541_PLA2	116	A	E	0.511	0.018	0.019	0.964	0.509111
N.mossambica_2269_0.324915476505541_PLA2	117	R	B	0.474	0.018	0.047	0.935	0.443
N.mossambica_2269_0.324915476505541_PLA2	118	C	B	0.094	0.018	0.019	0.964	0.377556
N.mossambica_2269_0.324915476505541_PLA2	119	Q	B	0.743	0.003	0.003	0.994	0.309222
N.mossambica_956_2283_1048_0.5086_PLA2	1	N	B	0.692	0.003	0.003	0.994	0.253
N.mossambica_956_2283_1048_0.5086_PLA2	2	L	B	0.243	0.782	0.003	0.216	0.316889
N.mossambica_956_2283_1048_0.5086_PLA2	3	Y	B	0.277	0.858	0.002	0.139	0.369222
N.mossambica_956_2283_1048_0.5086_PLA2	4	Q	B	0.317	0.879	0.01	0.111	0.404667
N.mossambica_956_2283_1048_0.5086_PLA2	5	F	B	0.051	0.938	0.007	0.055	0.440333
N.mossambica_956_2283_1048_0.5086_PLA2	6	K	B	0.229	0.923	0.002	0.076	0.464333
N.mossambica_956_2283_1048_0.5086_PLA2	7	N	B	0.398	0.923	0.002	0.076	0.461333
N.mossambica_956_2283_1048_0.5086_PLA2	8	M	B	0.054	0.97	0.001	0.03	0.448111
N.mossambica_956_2283_1048_0.5086_PLA2	9	I	B	0.031	0.975	0.003	0.022	0.431
N.mossambica_956_2283_1048_0.5086_PLA2	10	H	B	0.329	0.938	0.007	0.055	0.452
N.mossambica_956_2283_1048_0.5086_PLA2	11	C	B	0.188	0.879	0.01	0.111	0.443667
N.mossambica_956_2283_1048_0.5086_PLA2	12	T	B	0.116	0.802	0.014	0.185	0.451778
N.mossambica_956_2283_1048_0.5086_PLA2	13	V	B	0.116	0.43	0.016	0.555	0.470222
N.mossambica_956_2283_1048_0.5086_PLA2	14	P	B	0.447	0.058	0.017	0.925	0.481222
N.mossambica_956_2283_1048_0.5086_PLA2	15	S	B	0.418	0.018	0.019	0.964	0.478889
N.mossambica_956_2283_1048_0.5086_PLA2	16	R	B	0.243	0.018	0.019	0.964	0.483
N.mossambica_956_2283_1048_0.5086_PLA2	17	P	B	0.066	0.115	0.016	0.868	0.483444
N.mossambica_956_2283_1048_0.5086_PLA2	18	W	B	0.095	0.43	0.016	0.555	0.497778
N.mossambica_956_2283_1048_0.5086_PLA2	19	W	B	0.179	0.455	0.046	0.498	0.488778
N.mossambica_956_2283_1048_0.5086_PLA2	20	H	B	0.187	0.502	0.102	0.396	0.485444
N.mossambica_956_2283_1048_0.5086_PLA2	21	F	B	0.058	0.502	0.102	0.396	0.475889
N.mossambica_956_2283_1048_0.5086_PLA2	22	A	B	0.236	0.386	0.097	0.517	0.465111
N.mossambica_956_2283_1048_0.5086_PLA2	23	D	B	0.353	0.278	0.093	0.628	0.470444
N.mossambica_956_2283_1048_0.5086_PLA2	24	Y	B	0.052	0.113	0.087	0.8	0.456444
N.mossambica_956_2283_1048_0.5086_PLA2	25	G	B	0.044	0.056	0.142	0.802	0.446
N.mossambica_956_2283_1048_0.5086_PLA2	26	C	B	0.025	0.022	0.359	0.619	0.457889
N.mossambica_956_2283_1048_0.5086_PLA2	27	Y	B	0.072	0.021	0.451	0.528	0.465444
N.mossambica_956_2283_1048_0.5086_PLA2	28	C	B	0.019	0.022	0.359	0.619	0.470778
N.mossambica_956_2283_1048_0.5086_PLA2	29	G	B	0.084	0.021	0.279	0.699	0.499889
N.mossambica_956_2283_1048_0.5086_PLA2	30	R	E	0.263	0.019	0.141	0.84	0.524778
N.mossambica_956_2283_1048_0.5086_PLA2	31	G	E	0.329	0.005	0.045	0.951	0.555
N.mossambica_956_2283_1048_0.5086_PLA2	32	G	E	0.295	0.005	0.045	0.951	0.568111
N.mossambica_956_2283_1048_0.5086_PLA2	33	K	E	0.533	0.018	0.047	0.935	0.585
N.mossambica_956_2283_1048_0.5086_PLA2	34	G	E	0.429	0.018	0.047	0.935	0.614444
N.mossambica_956_2283_1048_0.5086_PLA2	35	T	E	0.415	0.005	0.045	0.951	0.629889
N.mossambica_956_2283_1048_0.5086_PLA2	36	P	E	0.291	0.018	0.047	0.935	0.627111
N.mossambica_956_2283_1048_0.5086_PLA2	37	V	E	0.455	0.018	0.047	0.935	0.631889
N.mossambica_956_2283_1048_0.5086_PLA2	38	D	E	0.43	0.018	0.047	0.935	0.618222
N.mossambica_956_2283_1048_0.5086_PLA2	39	D	E	0.561	0.053	0.043	0.903	0.595
N.mossambica_956_2283_1048_0.5086_PLA2	40	L	E	0.36	0.053	0.043	0.903	0.575667
N.mossambica_956_2283_1048_0.5086_PLA2	41	D	E	0.372	0.053	0.043	0.903	0.572111
N.mossambica_956_2283_1048_0.5086_PLA2	42	R	E	0.348	0.113	0.087	0.8	0.570889
N.mossambica_956_2283_1048_0.5086_PLA2	43	C	E	0.037	0.199	0.152	0.649	0.557
N.mossambica_956_2283_1048_0.5086_PLA2	44	C	E	0.06	0.216	0.235	0.548	0.539
N.mossambica_956_2283_1048_0.5086_PLA2	45	Q	E	0.377	0.125	0.227	0.648	0.534333
N.mossambica_956_2283_1048_0.5086_PLA2	46	V	E	0.395	0.052	0.084	0.864	0.513778
N.mossambica_956_2283_1048_0.5086_PLA2	47	H	E	0.209	0.053	0.043	0.903	0.500444
N.mossambica_956_2283_1048_0.5086_PLA2	48	D	E	0.493	0.058	0.017	0.925	0.502667
N.mossambica_956_2283_1048_0.5086_PLA2	49	N	E	0.216	0.257	0.016	0.727	0.502
N.mossambica_956_2283_1048_0.5086_PLA2	50	C	B	0.048	0.522	0.016	0.462	0.482889
N.mossambica_956_2283_1048_0.5086_PLA2	51	Y	B	0.118	0.858	0.002	0.139	0.485111
N.mossambica_956_2283_1048_0.5086_PLA2	52	E	B	0.508	0.923	0.002	0.076	0.481556
N.mossambica_956_2283_1048_0.5086_PLA2	53	K	B	0.412	0.858	0.002	0.139	0.487444
N.mossambica_956_2283_1048_0.5086_PLA2	54	A	B	0.038	0.858	0.002	0.139	0.489778
N.mossambica_956_2283_1048_0.5086_PLA2	55	G	B	0.456	0.802	0.014	0.185	0.486556
N.mossambica_956_2283_1048_0.5086_PLA2	56	K	B	0.74	0.622	0.015	0.363	0.494333
N.mossambica_956_2283_1048_0.5086_PLA2	57	M	B	0.382	0.246	0.004	0.75	0.498111
N.mossambica_956_2283_1048_0.5086_PLA2	58	G	E	0.486	0.018	0.019	0.964	0.508111
N.mossambica_956_2283_1048_0.5086_PLA2	59	C	E	0.077	0.018	0.047	0.935	0.521667
N.mossambica_956_2283_1048_0.5086_PLA2	60	W	E	0.284	0.018	0.088	0.893	0.518778
N.mossambica_956_2283_1048_0.5086_PLA2	61	P	E	0.313	0.004	0.197	0.799	0.511889
N.mossambica_956_2283_1048_0.5086_PLA2	62	Y	E	0.38	0.005	0.336	0.66	0.511556
N.mossambica_956_2283_1048_0.5086_PLA2	63	F	E	0.26	0.004	0.514	0.481	0.510556
N.mossambica_956_2283_1048_0.5086_PLA2	64	T	E	0.328	0.004	0.514	0.481	0.526444
N.mossambica_956_2283_1048_0.5086_PLA2	65	L	E	0.354	0.004	0.514	0.481	0.506444
N.mossambica_956_2283_1048_0.5086_PLA2	66	Y	B	0.114	0.004	0.616	0.381	0.492889
N.mossambica_956_2283_1048_0.5086_PLA2	67	K	B	0.449	0.003	0.718	0.279	0.485333
N.mossambica_956_2283_1048_0.5086_PLA2	68	Y	B	0.11	0.018	0.846	0.136	0.482667
N.mossambica_956_2283_1048_0.5086_PLA2	69	K	B	0.416	0.011	0.918	0.071	0.483778
N.mossambica_956_2283_1048_0.5086_PLA2	70	C	B	0.174	0.001	0.959	0.04	0.492667
N.mossambica_956_2283_1048_0.5086_PLA2	71	S	B	0.501	0.002	0.816	0.182	0.475556
N.mossambica_956_2283_1048_0.5086_PLA2	72	Q	B	0.667	0.005	0.045	0.951	0.470667
N.mossambica_956_2283_1048_0.5086_PLA2	73	G	B	0.635	0.005	0.015	0.979	0.443889
N.mossambica_956_2283_1048_0.5086_PLA2	74	K	B	0.635	0.004	0.514	0.481	0.459556
N.mossambica_956_2283_1048_0.5086_PLA2	75	L	B	0.071	0.002	0.816	0.182	0.476667
N.mossambica_956_2283_1048_0.5086_PLA2	76	P	B	0.395	0.001	0.9	0.099	0.486556
N.mossambica_956_2283_1048_0.5086_PLA2	77	C	B	0.046	0.002	0.816	0.182	0.495
N.mossambica_956_2283_1048_0.5086_PLA2	78	S	B	0.427	0.005	0.336	0.66	0.498556
N.mossambica_956_2283_1048_0.5086_PLA2	79	G	B	0.658	0.005	0.045	0.951	0.497
N.mossambica_956_2283_1048_0.5086_PLA2	80	G	B	0.632	0.003	0.003	0.994	0.498778
N.mossambica_956_2283_1048_0.5086_PLA2	81	N	E	0.622	0.053	0.005	0.942	0.502444
N.mossambica_956_2283_1048_0.5086_PLA2	82	N	E	0.493	0.176	0.004	0.82	0.519778
N.mossambica_956_2283_1048_0.5086_PLA2	83	K	E	0.436	0.782	0.003	0.216	0.507444
N.mossambica_956_2283_1048_0.5086_PLA2	84	C	B	0.038	0.782	0.003	0.216	0.488889
N.mossambica_956_2283_1048_0.5086_PLA2	85	Q	B	0.247	0.858	0.002	0.139	0.465
N.mossambica_956_2283_1048_0.5086_PLA2	86	A	B	0.492	0.879	0.01	0.111	0.457556
N.mossambica_956_2283_1048_0.5086_PLA2	87	A	B	0.257	0.938	0.007	0.055	0.420222
N.mossambica_956_2283_1048_0.5086_PLA2	88	V	B	0.129	0.879	0.01	0.111	0.413556
N.mossambica_956_2283_1048_0.5086_PLA2	89	C	B	0.071	0.802	0.014	0.185	0.415778
N.mossambica_956_2283_1048_0.5086_PLA2	90	N	B	0.478	0.782	0.003	0.216	0.413
N.mossambica_956_2283_1048_0.5086_PLA2	91	C	B	0.038	0.694	0.003	0.303	0.397556
N.mossambica_956_2283_1048_0.5086_PLA2	92	D	B	0.183	0.782	0.003	0.216	0.384667
N.mossambica_956_2283_1048_0.5086_PLA2	93	L	B	0.365	0.97	0.001	0.03	0.391444
N.mossambica_956_2283_1048_0.5086_PLA2	94	V	B	0.218	0.97	0.001	0.03	0.383111
N.mossambica_956_2283_1048_0.5086_PLA2	95	A	B	0.028	0.97	0.001	0.03	0.373111
N.mossambica_956_2283_1048_0.5086_PLA2	96	A	B	0.054	0.97	0.001	0.03	0.395111
N.mossambica_956_2283_1048_0.5086_PLA2	97	N	B	0.308	0.97	0.001	0.03	0.408667
N.mossambica_956_2283_1048_0.5086_PLA2	98	C	B	0.02	0.923	0.002	0.076	0.414889
N.mossambica_956_2283_1048_0.5086_PLA2	99	F	B	0.073	0.782	0.003	0.216	0.422778
N.mossambica_956_2283_1048_0.5086_PLA2	100	A	B	0.348	0.6	0.003	0.397	0.445556
N.mossambica_956_2283_1048_0.5086_PLA2	101	G	B	0.591	0.321	0.003	0.675	0.469667
N.mossambica_956_2283_1048_0.5086_PLA2	102	A	B	0.134	0.053	0.005	0.942	0.490889
N.mossambica_956_2283_1048_0.5086_PLA2	103	P	E	0.509	0.018	0.019	0.964	0.523
N.mossambica_956_2283_1048_0.5086_PLA2	104	Y	E	0.25	0.018	0.019	0.964	0.536556
N.mossambica_956_2283_1048_0.5086_PLA2	105	I	E	0.275	0.053	0.043	0.903	0.552111
N.mossambica_956_2283_1048_0.5086_PLA2	106	D	E	0.497	0.184	0.043	0.773	0.560556
N.mossambica_956_2283_1048_0.5086_PLA2	107	A	E	0.592	0.268	0.043	0.689	0.564444
N.mossambica_956_2283_1048_0.5086_PLA2	108	N	E	0.293	0.268	0.043	0.689	0.571111
N.mossambica_956_2283_1048_0.5086_PLA2	109	Y	E	0.179	0.184	0.043	0.773	0.589889
N.mossambica_956_2283_1048_0.5086_PLA2	110	N	E	0.484	0.191	0.086	0.723	0.608222
N.mossambica_956_2283_1048_0.5086_PLA2	111	V	E	0.16	0.113	0.043	0.844	0.607111
N.mossambica_956_2283_1048_0.5086_PLA2	112	N	E	0.391	0.018	0.019	0.964	0.606
N.mossambica_956_2283_1048_0.5086_PLA2	113	L	E	0.536	0.018	0.019	0.964	0.595
N.mossambica_956_2283_1048_0.5086_PLA2	114	K	E	0.573	0.018	0.019	0.964	0.596778
N.mossambica_956_2283_1048_0.5086_PLA2	115	E	E	0.564	0.018	0.019	0.964	0.525444
N.mossambica_956_2283_1048_0.5086_PLA2	116	R	B	0.422	0.016	0.005	0.979	0.466889
N.mossambica_956_2283_1048_0.5086_PLA2	117	C	B	0.07	0.016	0.005	0.979	0.398333
N.mossambica_956_2283_1048_0.5086_PLA2	118	Q	B	0.706	0.003	0.003	0.994	0.322778
N.mossambica_976_0.0051078127118414_PLA2	1	N	B	0.705	0.003	0.003	0.994	0.252556
N.mossambica_976_0.0051078127118414_PLA2	2	L	B	0.27	0.782	0.003	0.216	0.319556
N.mossambica_976_0.0051078127118414_PLA2	3	Y	B	0.287	0.858	0.002	0.139	0.371778
N.mossambica_976_0.0051078127118414_PLA2	4	Q	B	0.344	0.879	0.01	0.111	0.407889
N.mossambica_976_0.0051078127118414_PLA2	5	F	B	0.061	0.938	0.007	0.055	0.441556
N.mossambica_976_0.0051078127118414_PLA2	6	K	B	0.232	0.938	0.007	0.055	0.468222
N.mossambica_976_0.0051078127118414_PLA2	7	N	B	0.417	0.923	0.002	0.076	0.463444
N.mossambica_976_0.0051078127118414_PLA2	8	M	B	0.063	0.97	0.001	0.03	0.455
N.mossambica_976_0.0051078127118414_PLA2	9	I	B	0.039	0.975	0.003	0.022	0.438111
N.mossambica_976_0.0051078127118414_PLA2	10	H	B	0.362	0.938	0.007	0.055	0.460556
N.mossambica_976_0.0051078127118414_PLA2	11	C	B	0.204	0.879	0.01	0.111	0.452111
N.mossambica_976_0.0051078127118414_PLA2	12	T	B	0.143	0.802	0.014	0.185	0.464667
N.mossambica_976_0.0051078127118414_PLA2	13	V	B	0.119	0.339	0.016	0.645	0.483889
N.mossambica_976_0.0051078127118414_PLA2	14	P	E	0.448	0.058	0.017	0.925	0.500333
N.mossambica_976_0.0051078127118414_PLA2	15	S	E	0.418	0.018	0.019	0.964	0.500222
N.mossambica_976_0.0051078127118414_PLA2	16	R	E	0.284	0.018	0.019	0.964	0.509667
N.mossambica_976_0.0051078127118414_PLA2	17	P	E	0.086	0.115	0.016	0.868	0.510667
N.mossambica_976_0.0051078127118414_PLA2	18	W	E	0.123	0.339	0.016	0.645	0.529778
N.mossambica_976_0.0051078127118414_PLA2	19	W	E	0.224	0.354	0.048	0.598	0.522889
N.mossambica_976_0.0051078127118414_PLA2	20	H	E	0.235	0.386	0.097	0.517	0.517111
N.mossambica_976_0.0051078127118414_PLA2	21	F	E	0.073	0.386	0.097	0.517	0.504
N.mossambica_976_0.0051078127118414_PLA2	22	A	B	0.283	0.278	0.093	0.628	0.490444
N.mossambica_976_0.0051078127118414_PLA2	23	D	B	0.371	0.191	0.086	0.723	0.492333
N.mossambica_976_0.0051078127118414_PLA2	24	Y	B	0.054	0.052	0.084	0.864	0.472444
N.mossambica_976_0.0051078127118414_PLA2	25	G	B	0.048	0.019	0.141	0.84	0.461333
N.mossambica_976_0.0051078127118414_PLA2	26	C	B	0.029	0.022	0.359	0.619	0.470333
N.mossambica_976_0.0051078127118414_PLA2	27	Y	B	0.088	0.021	0.451	0.528	0.473444
N.mossambica_976_0.0051078127118414_PLA2	28	C	B	0.021	0.022	0.359	0.619	0.472111
N.mossambica_976_0.0051078127118414_PLA2	29	G	B	0.104	0.02	0.205	0.775	0.498556
N.mossambica_976_0.0051078127118414_PLA2	30	R	E	0.295	0.018	0.088	0.893	0.524111
N.mossambica_976_0.0051078127118414_PLA2	31	G	E	0.385	0.005	0.045	0.951	0.557667
N.mossambica_976_0.0051078127118414_PLA2	32	G	E	0.266	0.005	0.045	0.951	0.571889
N.mossambica_976_0.0051078127118414_PLA2	33	K	E	0.569	0.018	0.047	0.935	0.590667
N.mossambica_976_0.0051078127118414_PLA2	34	G	E	0.457	0.018	0.047	0.935	0.62
N.mossambica_976_0.0051078127118414_PLA2	35	T	E	0.402	0.018	0.047	0.935	0.629667
N.mossambica_976_0.0051078127118414_PLA2	36	A	E	0.308	0.018	0.047	0.935	0.619
N.mossambica_976_0.0051078127118414_PLA2	37	V	E	0.402	0.053	0.043	0.903	0.620778
N.mossambica_976_0.0051078127118414_PLA2	38	D	E	0.448	0.053	0.043	0.903	0.599
N.mossambica_976_0.0051078127118414_PLA2	39	D	E	0.477	0.113	0.043	0.844	0.567
N.mossambica_976_0.0051078127118414_PLA2	40	L	E	0.272	0.184	0.043	0.773	0.536667
N.mossambica_976_0.0051078127118414_PLA2	41	D	E	0.322	0.184	0.043	0.773	0.525
N.mossambica_976_0.0051078127118414_PLA2	42	R	E	0.358	0.354	0.048	0.598	0.523111
N.mossambica_976_0.0051078127118414_PLA2	43	C	E	0.038	0.502	0.102	0.396	0.504778
N.mossambica_976_0.0051078127118414_PLA2	44	C	B	0.041	0.538	0.173	0.289	0.488889
N.mossambica_976_0.0051078127118414_PLA2	45	Q	B	0.343	0.428	0.171	0.402	0.491556
N.mossambica_976_0.0051078127118414_PLA2	46	V	B	0.418	0.191	0.086	0.723	0.473111
N.mossambica_976_0.0051078127118414_PLA2	47	H	B	0.156	0.053	0.043	0.903	0.471444
N.mossambica_976_0.0051078127118414_PLA2	48	D	B	0.621	0.058	0.017	0.925	0.475444
N.mossambica_976_0.0051078127118414_PLA2	49	N	B	0.248	0.181	0.016	0.803	0.476667
N.mossambica_976_0.0051078127118414_PLA2	50	C	B	0.046	0.522	0.016	0.462	0.463667
N.mossambica_976_0.0051078127118414_PLA2	51	Y	B	0.147	0.858	0.002	0.139	0.475222
N.mossambica_976_0.0051078127118414_PLA2	52	G	B	0.602	0.858	0.002	0.139	0.475667
N.mossambica_976_0.0051078127118414_PLA2	53	E	B	0.443	0.858	0.002	0.139	0.487
N.mossambica_976_0.0051078127118414_PLA2	54	A	B	0.045	0.782	0.003	0.216	0.492667
N.mossambica_976_0.0051078127118414_PLA2	55	E	B	0.55	0.694	0.003	0.303	0.494
N.mossambica_976_0.0051078127118414_PLA2	56	K	E	0.727	0.406	0.004	0.59	0.501
N.mossambica_976_0.0051078127118414_PLA2	57	L	E	0.448	0.109	0.005	0.886	0.514444
N.mossambica_976_0.0051078127118414_PLA2	58	G	E	0.53	0.018	0.019	0.964	0.533444
N.mossambica_976_0.0051078127118414_PLA2	59	C	E	0.127	0.018	0.047	0.935	0.550222
N.mossambica_976_0.0051078127118414_PLA2	60	W	E	0.288	0.004	0.138	0.858	0.540444
N.mossambica_976_0.0051078127118414_PLA2	61	P	E	0.364	0.005	0.262	0.733	0.536111
N.mossambica_976_0.0051078127118414_PLA2	62	Y	E	0.4	0.005	0.336	0.66	0.522444
N.mossambica_976_0.0051078127118414_PLA2	63	L	E	0.226	0.004	0.42	0.576	0.515333
N.mossambica_976_0.0051078127118414_PLA2	64	T	E	0.442	0.004	0.42	0.576	0.520333
N.mossambica_976_0.0051078127118414_PLA2	65	L	B	0.43	0.004	0.514	0.481	0.497444
N.mossambica_976_0.0051078127118414_PLA2	66	Y	B	0.096	0.003	0.718	0.279	0.476444
N.mossambica_976_0.0051078127118414_PLA2	67	K	B	0.426	0.002	0.816	0.182	0.466444
N.mossambica_976_0.0051078127118414_PLA2	68	Y	B	0.091	0.001	0.9	0.099	0.458444
N.mossambica_976_0.0051078127118414_PLA2	69	E	B	0.444	0.011	0.918	0.071	0.456111
N.mossambica_976_0.0051078127118414_PLA2	70	C	B	0.141	0.001	0.9	0.099	0.456444
N.mossambica_976_0.0051078127118414_PLA2	71	S	B	0.598	0.002	0.816	0.182	0.446889
N.mossambica_976_0.0051078127118414_PLA2	72	Q	B	0.726	0.005	0.045	0.951	0.445111
N.mossambica_976_0.0051078127118414_PLA2	73	G	B	0.466	0.005	0.015	0.979	0.424222
N.mossambica_976_0.0051078127118414_PLA2	74	K	B	0.534	0.004	0.616	0.381	0.438889
N.mossambica_976_0.0051078127118414_PLA2	75	L	B	0.05	0.001	0.9	0.099	0.457111
N.mossambica_976_0.0051078127118414_PLA2	76	T	B	0.385	0.001	0.9	0.099	0.466778
N.mossambica_976_0.0051078127118414_PLA2	77	C	B	0.032	0.002	0.816	0.182	0.476889
N.mossambica_976_0.0051078127118414_PLA2	78	S	B	0.471	0.005	0.262	0.733	0.481111
N.mossambica_976_0.0051078127118414_PLA2	79	G	B	0.611	0.005	0.045	0.951	0.484889
N.mossambica_976_0.0051078127118414_PLA2	80	G	B	0.676	0.003	0.003	0.994	0.490333
N.mossambica_976_0.0051078127118414_PLA2	81	N	B	0.649	0.053	0.005	0.942	0.492111
N.mossambica_976_0.0051078127118414_PLA2	82	N	E	0.578	0.246	0.004	0.75	0.513444
N.mossambica_976_0.0051078127118414_PLA2	83	K	E	0.453	0.782	0.003	0.216	0.502333
N.mossambica_976_0.0051078127118414_PLA2	84	C	B	0.035	0.782	0.003	0.216	0.482333
N.mossambica_976_0.0051078127118414_PLA2	85	A	B	0.237	0.858	0.002	0.139	0.461444
N.mossambica_976_0.0051078127118414_PLA2	86	A	B	0.509	0.938	0.007	0.055	0.457556
N.mossambica_976_0.0051078127118414_PLA2	87	A	B	0.28	0.923	0.002	0.076	0.421667
N.mossambica_976_0.0051078127118414_PLA2	88	V	B	0.089	0.923	0.002	0.076	0.410222
N.mossambica_976_0.0051078127118414_PLA2	89	C	B	0.071	0.923	0.002	0.076	0.414
N.mossambica_976_0.0051078127118414_PLA2	90	N	B	0.502	0.923	0.002	0.076	0.413556
N.mossambica_976_0.0051078127118414_PLA2	91	C	B	0.043	0.858	0.002	0.139	0.397333
N.mossambica_976_0.0051078127118414_PLA2	92	D	B	0.126	0.923	0.002	0.076	0.388667
N.mossambica_976_0.0051078127118414_PLA2	93	L	B	0.358	0.97	0.001	0.03	0.395444
N.mossambica_976_0.0051078127118414_PLA2	94	V	B	0.296	0.988	0	0.012	0.383222
N.mossambica_976_0.0051078127118414_PLA2	95	A	B	0.028	0.988	0	0.012	0.366556
N.mossambica_976_0.0051078127118414_PLA2	96	A	B	0.047	0.97	0.001	0.03	0.385556
N.mossambica_976_0.0051078127118414_PLA2	97	N	B	0.325	0.97	0.001	0.03	0.396778
N.mossambica_976_0.0051078127118414_PLA2	98	C	B	0.03	0.923	0.002	0.076	0.398889
N.mossambica_976_0.0051078127118414_PLA2	99	F	B	0.054	0.858	0.002	0.139	0.408556
N.mossambica_976_0.0051078127118414_PLA2	100	A	B	0.371	0.694	0.003	0.303	0.429444
N.mossambica_976_0.0051078127118414_PLA2	101	G	B	0.583	0.502	0.002	0.495	0.446333
N.mossambica_976_0.0051078127118414_PLA2	102	A	B	0.132	0.109	0.005	0.886	0.471444
N.mossambica_976_0.0051078127118414_PLA2	103	R	E	0.552	0.058	0.017	0.925	0.507556
N.mossambica_976_0.0051078127118414_PLA2	104	Y	E	0.216	0.018	0.047	0.935	0.528778
N.mossambica_976_0.0051078127118414_PLA2	105	I	E	0.232	0.053	0.043	0.903	0.546333
N.mossambica_976_0.0051078127118414_PLA2	106	D	E	0.49	0.257	0.016	0.727	0.559556
N.mossambica_976_0.0051078127118414_PLA2	107	A	E	0.638	0.339	0.016	0.645	0.562111
N.mossambica_976_0.0051078127118414_PLA2	108	N	E	0.348	0.339	0.016	0.645	0.563444
N.mossambica_976_0.0051078127118414_PLA2	109	Y	E	0.188	0.257	0.016	0.727	0.577667
N.mossambica_976_0.0051078127118414_PLA2	110	N	E	0.488	0.181	0.016	0.803	0.598778
N.mossambica_976_0.0051078127118414_PLA2	111	I	E	0.214	0.115	0.016	0.868	0.595667
N.mossambica_976_0.0051078127118414_PLA2	112	N	E	0.355	0.018	0.019	0.964	0.590444
N.mossambica_976_0.0051078127118414_PLA2	113	L	E	0.527	0.016	0.005	0.979	0.576667
N.mossambica_976_0.0051078127118414_PLA2	114	K	E	0.528	0.053	0.005	0.942	0.579333
N.mossambica_976_0.0051078127118414_PLA2	115	E	E	0.585	0.016	0.005	0.979	0.508889
N.mossambica_976_0.0051078127118414_PLA2	116	R	B	0.443	0.053	0.005	0.942	0.452222
N.mossambica_976_0.0051078127118414_PLA2	117	C	B	0.077	0.016	0.005	0.979	0.386778
N.mossambica_976_0.0051078127118414_PLA2	118	Q	B	0.72	0.003	0.003	0.994	0.317667
N.naja_1810_1899_0.2332_PLA2	1	N	B	0.66	0.003	0.003	0.994	0.255111
N.naja_1810_1899_0.2332_PLA2	2	L	B	0.249	0.802	0.014	0.185	0.320333
N.naja_1810_1899_0.2332_PLA2	3	Y	B	0.294	0.879	0.01	0.111	0.372
N.naja_1810_1899_0.2332_PLA2	4	Q	B	0.33	0.879	0.01	0.111	0.408
N.naja_1810_1899_0.2332_PLA2	5	F	B	0.061	0.938	0.007	0.055	0.445778
N.naja_1810_1899_0.2332_PLA2	6	K	B	0.259	0.938	0.007	0.055	0.469889
N.naja_1810_1899_0.2332_PLA2	7	N	B	0.411	0.938	0.007	0.055	0.469778
N.naja_1810_1899_0.2332_PLA2	8	M	B	0.072	0.938	0.007	0.055	0.460778
N.naja_1810_1899_0.2332_PLA2	9	I	B	0.036	0.938	0.007	0.055	0.443111
N.naja_1810_1899_0.2332_PLA2	10	K	B	0.339	0.938	0.007	0.055	0.464889
N.naja_1810_1899_0.2332_PLA2	11	C	B	0.194	0.879	0.01	0.111	0.459556
N.naja_1810_1899_0.2332_PLA2	12	T	B	0.142	0.717	0.014	0.269	0.473
N.naja_1810_1899_0.2332_PLA2	13	V	B	0.118	0.339	0.016	0.645	0.497111
N.naja_1810_1899_0.2332_PLA2	14	P	E	0.439	0.058	0.017	0.925	0.507222
N.naja_1810_1899_0.2332_PLA2	15	S	E	0.436	0.018	0.019	0.964	0.506778
N.naja_1810_1899_0.2332_PLA2	16	R	E	0.311	0.018	0.019	0.964	0.51
N.naja_1810_1899_0.2332_PLA2	17	S	E	0.096	0.053	0.005	0.942	0.510556
N.naja_1810_1899_0.2332_PLA2	18	W	E	0.082	0.339	0.016	0.645	0.528556
N.naja_1810_1899_0.2332_PLA2	19	W	E	0.225	0.354	0.048	0.598	0.517444
N.naja_1810_1899_0.2332_PLA2	20	D	E	0.227	0.386	0.097	0.517	0.510667
N.naja_1810_1899_0.2332_PLA2	21	F	B	0.061	0.502	0.102	0.396	0.496444
N.naja_1810_1899_0.2332_PLA2	22	A	B	0.284	0.386	0.097	0.517	0.478778
N.naja_1810_1899_0.2332_PLA2	23	D	B	0.375	0.191	0.086	0.723	0.484111
N.naja_1810_1899_0.2332_PLA2	24	Y	B	0.051	0.113	0.087	0.8	0.467889
N.naja_1810_1899_0.2332_PLA2	25	G	B	0.044	0.056	0.142	0.802	0.455889
N.naja_1810_1899_0.2332_PLA2	26	C	B	0.025	0.022	0.359	0.619	0.463778
N.naja_1810_1899_0.2332_PLA2	27	Y	B	0.076	0.021	0.451	0.528	0.462889
N.naja_1810_1899_0.2332_PLA2	28	C	B	0.02	0.021	0.451	0.528	0.463778
N.naja_1810_1899_0.2332_PLA2	29	G	B	0.071	0.021	0.279	0.699	0.486556
N.naja_1810_1899_0.2332_PLA2	30	R	E	0.313	0.018	0.088	0.893	0.510222
N.naja_1810_1899_0.2332_PLA2	31	G	E	0.256	0.005	0.045	0.951	0.541556
N.naja_1810_1899_0.2332_PLA2	32	G	E	0.246	0.018	0.047	0.935	0.555222
N.naja_1810_1899_0.2332_PLA2	33	S	E	0.55	0.018	0.047	0.935	0.57
N.naja_1810_1899_0.2332_PLA2	34	G	E	0.387	0.018	0.047	0.935	0.600778
N.naja_1810_1899_0.2332_PLA2	35	T	E	0.414	0.005	0.045	0.951	0.613
N.naja_1810_1899_0.2332_PLA2	36	P	E	0.305	0.018	0.047	0.935	0.614333
N.naja_1810_1899_0.2332_PLA2	37	V	E	0.435	0.052	0.084	0.864	0.620778
N.naja_1810_1899_0.2332_PLA2	38	D	E	0.499	0.053	0.043	0.903	0.609556
N.naja_1810_1899_0.2332_PLA2	39	D	E	0.547	0.052	0.084	0.864	0.585667
N.naja_1810_1899_0.2332_PLA2	40	L	E	0.327	0.113	0.087	0.8	0.566778
N.naja_1810_1899_0.2332_PLA2	41	D	E	0.315	0.113	0.087	0.8	0.560333
N.naja_1810_1899_0.2332_PLA2	42	R	E	0.329	0.191	0.086	0.723	0.560444
N.naja_1810_1899_0.2332_PLA2	43	C	E	0.038	0.278	0.093	0.628	0.543556
N.naja_1810_1899_0.2332_PLA2	44	C	E	0.058	0.307	0.165	0.527	0.527667
N.naja_1810_1899_0.2332_PLA2	45	Q	E	0.385	0.199	0.152	0.649	0.525444
N.naja_1810_1899_0.2332_PLA2	46	V	E	0.397	0.052	0.084	0.864	0.505778
N.naja_1810_1899_0.2332_PLA2	47	H	B	0.186	0.058	0.017	0.925	0.494222
N.naja_1810_1899_0.2332_PLA2	48	D	E	0.523	0.058	0.017	0.925	0.500444
N.naja_1810_1899_0.2332_PLA2	49	N	B	0.228	0.339	0.016	0.645	0.497444
N.naja_1810_1899_0.2332_PLA2	50	C	B	0.038	0.622	0.015	0.363	0.481333
N.naja_1810_1899_0.2332_PLA2	51	Y	B	0.105	0.858	0.002	0.139	0.486
N.naja_1810_1899_0.2332_PLA2	52	D	B	0.556	0.858	0.002	0.139	0.479
N.naja_1810_1899_0.2332_PLA2	53	E	B	0.379	0.858	0.002	0.139	0.48
N.naja_1810_1899_0.2332_PLA2	54	A	B	0.041	0.858	0.002	0.139	0.480667
N.naja_1810_1899_0.2332_PLA2	55	G	B	0.499	0.782	0.003	0.216	0.498111
N.naja_1810_1899_0.2332_PLA2	56	K	B	0.762	0.694	0.003	0.303	0.496111
N.naja_1810_1899_0.2332_PLA2	57	I	E	0.251	0.246	0.004	0.75	0.505667
N.naja_1810_1899_0.2332_PLA2	58	S	E	0.598	0.016	0.005	0.979	0.512333
N.naja_1810_1899_0.2332_PLA2	59	G	E	0.519	0.005	0.015	0.979	0.528667
N.naja_1810_1899_0.2332_PLA2	60	C	E	0.057	0.018	0.047	0.935	0.524444
N.naja_1810_1899_0.2332_PLA2	61	W	E	0.295	0.018	0.088	0.893	0.540444
N.naja_1810_1899_0.2332_PLA2	62	P	E	0.33	0.005	0.262	0.733	0.536444
N.naja_1810_1899_0.2332_PLA2	63	Y	E	0.326	0.005	0.336	0.66	0.529889
N.naja_1810_1899_0.2332_PLA2	64	F	E	0.195	0.004	0.514	0.481	0.521
N.naja_1810_1899_0.2332_PLA2	65	K	E	0.392	0.004	0.42	0.576	0.512889
N.naja_1810_1899_0.2332_PLA2	66	T	B	0.396	0.004	0.514	0.481	0.488
N.naja_1810_1899_0.2332_PLA2	67	Y	B	0.095	0.004	0.616	0.381	0.471
N.naja_1810_1899_0.2332_PLA2	68	S	B	0.436	0.002	0.816	0.182	0.461333
N.naja_1810_1899_0.2332_PLA2	69	Y	B	0.095	0.001	0.9	0.099	0.455222
N.naja_1810_1899_0.2332_PLA2	70	E	B	0.414	0.011	0.918	0.071	0.443667
N.naja_1810_1899_0.2332_PLA2	71	C	B	0.138	0.001	0.9	0.099	0.442222
N.naja_1810_1899_0.2332_PLA2	72	S	B	0.567	0.003	0.718	0.279	0.434333
N.naja_1810_1899_0.2332_PLA2	73	Q	B	0.731	0.005	0.045	0.951	0.427667
N.naja_1810_1899_0.2332_PLA2	74	G	B	0.485	0.005	0.015	0.979	0.417
N.naja_1810_1899_0.2332_PLA2	75	T	B	0.526	0.004	0.514	0.481	0.434
N.naja_1810_1899_0.2332_PLA2	76	L	B	0.065	0.002	0.816	0.182	0.455333
N.naja_1810_1899_0.2332_PLA2	77	T	B	0.35	0.001	0.9	0.099	0.464667
N.naja_1810_1899_0.2332_PLA2	78	C	B	0.035	0.002	0.816	0.182	0.470222
N.naja_1810_1899_0.2332_PLA2	79	K	B	0.467	0.005	0.262	0.733	0.476667
N.naja_1810_1899_0.2332_PLA2	80	G	B	0.541	0.005	0.045	0.951	0.489222
N.naja_1810_1899_0.2332_PLA2	81	D	B	0.718	0.005	0.015	0.979	0.491111
N.naja_1810_1899_0.2332_PLA2	82	N	B	0.641	0.053	0.005	0.942	0.493778
N.naja_1810_1899_0.2332_PLA2	83	N	E	0.515	0.176	0.004	0.82	0.509333
N.naja_1810_1899_0.2332_PLA2	84	A	B	0.447	0.782	0.003	0.216	0.496111
N.naja_1810_1899_0.2332_PLA2	85	C	B	0.043	0.782	0.003	0.216	0.480889
N.naja_1810_1899_0.2332_PLA2	86	A	B	0.266	0.879	0.01	0.111	0.468333
N.naja_1810_1899_0.2332_PLA2	87	A	B	0.515	0.879	0.01	0.111	0.463889
N.naja_1810_1899_0.2332_PLA2	88	S	B	0.304	0.879	0.01	0.111	0.435444
N.naja_1810_1899_0.2332_PLA2	89	V	B	0.127	0.879	0.01	0.111	0.420778
N.naja_1810_1899_0.2332_PLA2	90	C	B	0.064	0.802	0.014	0.185	0.431
N.naja_1810_1899_0.2332_PLA2	91	D	B	0.505	0.782	0.003	0.216	0.438111
N.naja_1810_1899_0.2332_PLA2	92	C	B	0.05	0.694	0.003	0.303	0.425444
N.naja_1810_1899_0.2332_PLA2	93	D	B	0.153	0.782	0.003	0.216	0.414333
N.naja_1810_1899_0.2332_PLA2	94	R	B	0.362	0.97	0.001	0.03	0.417111
N.naja_1810_1899_0.2332_PLA2	95	L	B	0.293	0.97	0.001	0.03	0.403222
N.naja_1810_1899_0.2332_PLA2	96	A	B	0.03	0.97	0.001	0.03	0.386778
N.naja_1810_1899_0.2332_PLA2	97	A	B	0.037	0.97	0.001	0.03	0.403333
N.naja_1810_1899_0.2332_PLA2	98	I	B	0.292	0.97	0.001	0.03	0.413667
N.naja_1810_1899_0.2332_PLA2	99	C	B	0.024	0.923	0.002	0.076	0.416333
N.naja_1810_1899_0.2332_PLA2	100	F	B	0.053	0.782	0.003	0.216	0.419
N.naja_1810_1899_0.2332_PLA2	101	A	B	0.313	0.6	0.003	0.397	0.438111
N.naja_1810_1899_0.2332_PLA2	102	G	B	0.591	0.321	0.003	0.675	0.46
N.naja_1810_1899_0.2332_PLA2	103	A	B	0.162	0.053	0.005	0.942	0.486111
N.naja_1810_1899_0.2332_PLA2	104	P	E	0.536	0.058	0.017	0.925	0.526667
N.naja_1810_1899_0.2332_PLA2	105	Y	E	0.231	0.053	0.043	0.903	0.559
N.naja_1810_1899_0.2332_PLA2	106	N	E	0.192	0.113	0.043	0.844	0.582778
N.naja_1810_1899_0.2332_PLA2	107	D	E	0.551	0.354	0.048	0.598	0.597
N.naja_1810_1899_0.2332_PLA2	108	N	E	0.619	0.339	0.016	0.645	0.600222
N.naja_1810_1899_0.2332_PLA2	109	N	E	0.297	0.339	0.016	0.645	0.604333
N.naja_1810_1899_0.2332_PLA2	110	Y	E	0.29	0.257	0.016	0.727	0.616889
N.naja_1810_1899_0.2332_PLA2	111	N	E	0.517	0.113	0.043	0.844	0.631556
N.naja_1810_1899_0.2332_PLA2	112	I	E	0.189	0.053	0.043	0.903	0.618444
N.naja_1810_1899_0.2332_PLA2	113	D	E	0.483	0.018	0.019	0.964	0.607444
N.naja_1810_1899_0.2332_PLA2	114	L	E	0.512	0.018	0.019	0.964	0.583444
N.naja_1810_1899_0.2332_PLA2	115	K	E	0.532	0.018	0.019	0.964	0.576222
N.naja_1810_1899_0.2332_PLA2	116	A	E	0.536	0.018	0.019	0.964	0.501778
N.naja_1810_1899_0.2332_PLA2	117	R	B	0.493	0.018	0.019	0.964	0.440222
N.naja_1810_1899_0.2332_PLA2	118	C	B	0.089	0.018	0.019	0.964	0.377
N.naja_1810_1899_0.2332_PLA2	119	Q	B	0.718	0.003	0.003	0.994	0.310111
N.naja_1915_1922_1929_1973_1988_1954_1860_1834_1934_1935_1993_3003_1968_1971_2640_0.8417_PLA2	1	N	B	0.717	0.003	0.003	0.994	0.251556
N.naja_1915_1922_1929_1973_1988_1954_1860_1834_1934_1935_1993_3003_1968_1971_2640_0.8417_PLA2	2	L	B	0.27	0.802	0.014	0.185	0.316444
N.naja_1915_1922_1929_1973_1988_1954_1860_1834_1934_1935_1993_3003_1968_1971_2640_0.8417_PLA2	3	Y	B	0.292	0.879	0.01	0.111	0.368333
N.naja_1915_1922_1929_1973_1988_1954_1860_1834_1934_1935_1993_3003_1968_1971_2640_0.8417_PLA2	4	Q	B	0.338	0.879	0.01	0.111	0.404444
N.naja_1915_1922_1929_1973_1988_1954_1860_1834_1934_1935_1993_3003_1968_1971_2640_0.8417_PLA2	5	F	B	0.067	0.938	0.007	0.055	0.440778
N.naja_1915_1922_1929_1973_1988_1954_1860_1834_1934_1935_1993_3003_1968_1971_2640_0.8417_PLA2	6	K	B	0.258	0.938	0.007	0.055	0.465667
N.naja_1915_1922_1929_1973_1988_1954_1860_1834_1934_1935_1993_3003_1968_1971_2640_0.8417_PLA2	7	N	B	0.403	0.938	0.007	0.055	0.466889
N.naja_1915_1922_1929_1973_1988_1954_1860_1834_1934_1935_1993_3003_1968_1971_2640_0.8417_PLA2	8	M	B	0.073	0.975	0.003	0.022	0.459222
N.naja_1915_1922_1929_1973_1988_1954_1860_1834_1934_1935_1993_3003_1968_1971_2640_0.8417_PLA2	9	I	B	0.034	0.938	0.007	0.055	0.441111
N.naja_1915_1922_1929_1973_1988_1954_1860_1834_1934_1935_1993_3003_1968_1971_2640_0.8417_PLA2	10	K	B	0.319	0.938	0.007	0.055	0.462778
N.naja_1915_1922_1929_1973_1988_1954_1860_1834_1934_1935_1993_3003_1968_1971_2640_0.8417_PLA2	11	C	B	0.192	0.879	0.01	0.111	0.457333
N.naja_1915_1922_1929_1973_1988_1954_1860_1834_1934_1935_1993_3003_1968_1971_2640_0.8417_PLA2	12	T	B	0.15	0.802	0.014	0.185	0.471222
N.naja_1915_1922_1929_1973_1988_1954_1860_1834_1934_1935_1993_3003_1968_1971_2640_0.8417_PLA2	13	V	B	0.115	0.43	0.016	0.555	0.495111
N.naja_1915_1922_1929_1973_1988_1954_1860_1834_1934_1935_1993_3003_1968_1971_2640_0.8417_PLA2	14	P	E	0.452	0.115	0.016	0.868	0.507
N.naja_1915_1922_1929_1973_1988_1954_1860_1834_1934_1935_1993_3003_1968_1971_2640_0.8417_PLA2	15	S	E	0.442	0.018	0.019	0.964	0.507
N.naja_1915_1922_1929_1973_1988_1954_1860_1834_1934_1935_1993_3003_1968_1971_2640_0.8417_PLA2	16	R	E	0.32	0.018	0.019	0.964	0.508889
N.naja_1915_1922_1929_1973_1988_1954_1860_1834_1934_1935_1993_3003_1968_1971_2640_0.8417_PLA2	17	S	E	0.089	0.053	0.005	0.942	0.508111
N.naja_1915_1922_1929_1973_1988_1954_1860_1834_1934_1935_1993_3003_1968_1971_2640_0.8417_PLA2	18	W	E	0.084	0.339	0.016	0.645	0.525444
N.naja_1915_1922_1929_1973_1988_1954_1860_1834_1934_1935_1993_3003_1968_1971_2640_0.8417_PLA2	19	W	E	0.248	0.455	0.046	0.498	0.514778
N.naja_1915_1922_1929_1973_1988_1954_1860_1834_1934_1935_1993_3003_1968_1971_2640_0.8417_PLA2	20	D	E	0.224	0.455	0.046	0.498	0.508556
N.naja_1915_1922_1929_1973_1988_1954_1860_1834_1934_1935_1993_3003_1968_1971_2640_0.8417_PLA2	21	F	B	0.057	0.502	0.102	0.396	0.493222
N.naja_1915_1922_1929_1973_1988_1954_1860_1834_1934_1935_1993_3003_1968_1971_2640_0.8417_PLA2	22	A	B	0.275	0.386	0.097	0.517	0.476
N.naja_1915_1922_1929_1973_1988_1954_1860_1834_1934_1935_1993_3003_1968_1971_2640_0.8417_PLA2	23	D	B	0.369	0.278	0.093	0.628	0.480889
N.naja_1915_1922_1929_1973_1988_1954_1860_1834_1934_1935_1993_3003_1968_1971_2640_0.8417_PLA2	24	Y	B	0.05	0.113	0.087	0.8	0.465
N.naja_1915_1922_1929_1973_1988_1954_1860_1834_1934_1935_1993_3003_1968_1971_2640_0.8417_PLA2	25	G	B	0.043	0.056	0.142	0.802	0.453556
N.naja_1915_1922_1929_1973_1988_1954_1860_1834_1934_1935_1993_3003_1968_1971_2640_0.8417_PLA2	26	C	B	0.025	0.022	0.359	0.619	0.462111
N.naja_1915_1922_1929_1973_1988_1954_1860_1834_1934_1935_1993_3003_1968_1971_2640_0.8417_PLA2	27	Y	B	0.077	0.021	0.451	0.528	0.462333
N.naja_1915_1922_1929_1973_1988_1954_1860_1834_1934_1935_1993_3003_1968_1971_2640_0.8417_PLA2	28	C	B	0.02	0.021	0.451	0.528	0.462444
N.naja_1915_1922_1929_1973_1988_1954_1860_1834_1934_1935_1993_3003_1968_1971_2640_0.8417_PLA2	29	G	B	0.069	0.021	0.279	0.699	0.484222
N.naja_1915_1922_1929_1973_1988_1954_1860_1834_1934_1935_1993_3003_1968_1971_2640_0.8417_PLA2	30	R	E	0.309	0.018	0.088	0.893	0.508333
N.naja_1915_1922_1929_1973_1988_1954_1860_1834_1934_1935_1993_3003_1968_1971_2640_0.8417_PLA2	31	G	E	0.254	0.005	0.045	0.951	0.539444
N.naja_1915_1922_1929_1973_1988_1954_1860_1834_1934_1935_1993_3003_1968_1971_2640_0.8417_PLA2	32	G	E	0.246	0.018	0.047	0.935	0.553222
N.naja_1915_1922_1929_1973_1988_1954_1860_1834_1934_1935_1993_3003_1968_1971_2640_0.8417_PLA2	33	S	E	0.549	0.018	0.047	0.935	0.568222
N.naja_1915_1922_1929_1973_1988_1954_1860_1834_1934_1935_1993_3003_1968_1971_2640_0.8417_PLA2	34	G	E	0.39	0.018	0.047	0.935	0.599333
N.naja_1915_1922_1929_1973_1988_1954_1860_1834_1934_1935_1993_3003_1968_1971_2640_0.8417_PLA2	35	T	E	0.427	0.005	0.015	0.979	0.613333
N.naja_1915_1922_1929_1973_1988_1954_1860_1834_1934_1935_1993_3003_1968_1971_2640_0.8417_PLA2	36	P	E	0.305	0.018	0.047	0.935	0.614667
N.naja_1915_1922_1929_1973_1988_1954_1860_1834_1934_1935_1993_3003_1968_1971_2640_0.8417_PLA2	37	V	E	0.434	0.053	0.043	0.903	0.622111
N.naja_1915_1922_1929_1973_1988_1954_1860_1834_1934_1935_1993_3003_1968_1971_2640_0.8417_PLA2	38	D	E	0.504	0.053	0.043	0.903	0.611889
N.naja_1915_1922_1929_1973_1988_1954_1860_1834_1934_1935_1993_3003_1968_1971_2640_0.8417_PLA2	39	D	E	0.538	0.113	0.043	0.844	0.587111
N.naja_1915_1922_1929_1973_1988_1954_1860_1834_1934_1935_1993_3003_1968_1971_2640_0.8417_PLA2	40	L	E	0.313	0.113	0.087	0.8	0.568111
N.naja_1915_1922_1929_1973_1988_1954_1860_1834_1934_1935_1993_3003_1968_1971_2640_0.8417_PLA2	41	D	E	0.318	0.191	0.086	0.723	0.562444
N.naja_1915_1922_1929_1973_1988_1954_1860_1834_1934_1935_1993_3003_1968_1971_2640_0.8417_PLA2	42	R	E	0.338	0.278	0.093	0.628	0.563333
N.naja_1915_1922_1929_1973_1988_1954_1860_1834_1934_1935_1993_3003_1968_1971_2640_0.8417_PLA2	43	C	E	0.039	0.386	0.097	0.517	0.546111
N.naja_1915_1922_1929_1973_1988_1954_1860_1834_1934_1935_1993_3003_1968_1971_2640_0.8417_PLA2	44	C	E	0.065	0.307	0.165	0.527	0.530556
N.naja_1915_1922_1929_1973_1988_1954_1860_1834_1934_1935_1993_3003_1968_1971_2640_0.8417_PLA2	45	Q	E	0.388	0.191	0.086	0.723	0.528333
N.naja_1915_1922_1929_1973_1988_1954_1860_1834_1934_1935_1993_3003_1968_1971_2640_0.8417_PLA2	46	V	E	0.385	0.113	0.043	0.844	0.506333
N.naja_1915_1922_1929_1973_1988_1954_1860_1834_1934_1935_1993_3003_1968_1971_2640_0.8417_PLA2	47	H	B	0.184	0.115	0.016	0.868	0.494
N.naja_1915_1922_1929_1973_1988_1954_1860_1834_1934_1935_1993_3003_1968_1971_2640_0.8417_PLA2	48	D	B	0.529	0.115	0.016	0.868	0.497222
N.naja_1915_1922_1929_1973_1988_1954_1860_1834_1934_1935_1993_3003_1968_1971_2640_0.8417_PLA2	49	N	B	0.226	0.339	0.016	0.645	0.489444
N.naja_1915_1922_1929_1973_1988_1954_1860_1834_1934_1935_1993_3003_1968_1971_2640_0.8417_PLA2	50	C	B	0.036	0.622	0.015	0.363	0.468111
N.naja_1915_1922_1929_1973_1988_1954_1860_1834_1934_1935_1993_3003_1968_1971_2640_0.8417_PLA2	51	Y	B	0.107	0.879	0.01	0.111	0.474
N.naja_1915_1922_1929_1973_1988_1954_1860_1834_1934_1935_1993_3003_1968_1971_2640_0.8417_PLA2	52	N	B	0.523	0.923	0.002	0.076	0.468556
N.naja_1915_1922_1929_1973_1988_1954_1860_1834_1934_1935_1993_3003_1968_1971_2640_0.8417_PLA2	53	E	B	0.356	0.923	0.002	0.076	0.469667
N.naja_1915_1922_1929_1973_1988_1954_1860_1834_1934_1935_1993_3003_1968_1971_2640_0.8417_PLA2	54	A	B	0.04	0.858	0.002	0.139	0.471444
N.naja_1915_1922_1929_1973_1988_1954_1860_1834_1934_1935_1993_3003_1968_1971_2640_0.8417_PLA2	55	E	B	0.492	0.858	0.002	0.139	0.491
N.naja_1915_1922_1929_1973_1988_1954_1860_1834_1934_1935_1993_3003_1968_1971_2640_0.8417_PLA2	56	K	B	0.752	0.717	0.014	0.269	0.490444
N.naja_1915_1922_1929_1973_1988_1954_1860_1834_1934_1935_1993_3003_1968_1971_2640_0.8417_PLA2	57	I	E	0.26	0.246	0.004	0.75	0.502
N.naja_1915_1922_1929_1973_1988_1954_1860_1834_1934_1935_1993_3003_1968_1971_2640_0.8417_PLA2	58	S	E	0.629	0.016	0.005	0.979	0.512889
N.naja_1915_1922_1929_1973_1988_1954_1860_1834_1934_1935_1993_3003_1968_1971_2640_0.8417_PLA2	59	G	E	0.507	0.005	0.015	0.979	0.535889
N.naja_1915_1922_1929_1973_1988_1954_1860_1834_1934_1935_1993_3003_1968_1971_2640_0.8417_PLA2	60	C	E	0.059	0.018	0.047	0.935	0.528556
N.naja_1915_1922_1929_1973_1988_1954_1860_1834_1934_1935_1993_3003_1968_1971_2640_0.8417_PLA2	61	W	E	0.307	0.019	0.141	0.84	0.541667
N.naja_1915_1922_1929_1973_1988_1954_1860_1834_1934_1935_1993_3003_1968_1971_2640_0.8417_PLA2	62	P	E	0.342	0.005	0.262	0.733	0.535
N.naja_1915_1922_1929_1973_1988_1954_1860_1834_1934_1935_1993_3003_1968_1971_2640_0.8417_PLA2	63	Y	E	0.345	0.004	0.42	0.576	0.530333
N.naja_1915_1922_1929_1973_1988_1954_1860_1834_1934_1935_1993_3003_1968_1971_2640_0.8417_PLA2	64	F	E	0.261	0.004	0.616	0.381	0.519889
N.naja_1915_1922_1929_1973_1988_1954_1860_1834_1934_1935_1993_3003_1968_1971_2640_0.8417_PLA2	65	K	E	0.38	0.004	0.514	0.481	0.513667
N.naja_1915_1922_1929_1973_1988_1954_1860_1834_1934_1935_1993_3003_1968_1971_2640_0.8417_PLA2	66	T	B	0.392	0.004	0.616	0.381	0.490333
N.naja_1915_1922_1929_1973_1988_1954_1860_1834_1934_1935_1993_3003_1968_1971_2640_0.8417_PLA2	67	Y	B	0.098	0.004	0.616	0.381	0.474111
N.naja_1915_1922_1929_1973_1988_1954_1860_1834_1934_1935_1993_3003_1968_1971_2640_0.8417_PLA2	68	S	B	0.418	0.002	0.816	0.182	0.462111
N.naja_1915_1922_1929_1973_1988_1954_1860_1834_1934_1935_1993_3003_1968_1971_2640_0.8417_PLA2	69	Y	B	0.098	0.001	0.9	0.099	0.455778
N.naja_1915_1922_1929_1973_1988_1954_1860_1834_1934_1935_1993_3003_1968_1971_2640_0.8417_PLA2	70	E	B	0.394	0.011	0.918	0.071	0.445778
N.naja_1915_1922_1929_1973_1988_1954_1860_1834_1934_1935_1993_3003_1968_1971_2640_0.8417_PLA2	71	C	B	0.132	0.001	0.9	0.099	0.443889
N.naja_1915_1922_1929_1973_1988_1954_1860_1834_1934_1935_1993_3003_1968_1971_2640_0.8417_PLA2	72	S	B	0.544	0.003	0.718	0.279	0.432
N.naja_1915_1922_1929_1973_1988_1954_1860_1834_1934_1935_1993_3003_1968_1971_2640_0.8417_PLA2	73	Q	B	0.72	0.005	0.045	0.951	0.427222
N.naja_1915_1922_1929_1973_1988_1954_1860_1834_1934_1935_1993_3003_1968_1971_2640_0.8417_PLA2	74	G	B	0.487	0.005	0.015	0.979	0.414333
N.naja_1915_1922_1929_1973_1988_1954_1860_1834_1934_1935_1993_3003_1968_1971_2640_0.8417_PLA2	75	T	B	0.555	0.004	0.616	0.381	0.432667
N.naja_1915_1922_1929_1973_1988_1954_1860_1834_1934_1935_1993_3003_1968_1971_2640_0.8417_PLA2	76	L	B	0.059	0.002	0.816	0.182	0.451111
N.naja_1915_1922_1929_1973_1988_1954_1860_1834_1934_1935_1993_3003_1968_1971_2640_0.8417_PLA2	77	T	B	0.369	0.001	0.9	0.099	0.458556
N.naja_1915_1922_1929_1973_1988_1954_1860_1834_1934_1935_1993_3003_1968_1971_2640_0.8417_PLA2	78	C	B	0.031	0.002	0.816	0.182	0.462333
N.naja_1915_1922_1929_1973_1988_1954_1860_1834_1934_1935_1993_3003_1968_1971_2640_0.8417_PLA2	79	K	B	0.465	0.005	0.262	0.733	0.468667
N.naja_1915_1922_1929_1973_1988_1954_1860_1834_1934_1935_1993_3003_1968_1971_2640_0.8417_PLA2	80	G	B	0.517	0.005	0.045	0.951	0.482333
N.naja_1915_1922_1929_1973_1988_1954_1860_1834_1934_1935_1993_3003_1968_1971_2640_0.8417_PLA2	81	D	B	0.751	0.005	0.015	0.979	0.486222
N.naja_1915_1922_1929_1973_1988_1954_1860_1834_1934_1935_1993_3003_1968_1971_2640_0.8417_PLA2	82	N	B	0.656	0.053	0.005	0.942	0.488333
N.naja_1915_1922_1929_1973_1988_1954_1860_1834_1934_1935_1993_3003_1968_1971_2640_0.8417_PLA2	83	N	E	0.533	0.176	0.004	0.82	0.503111
N.naja_1915_1922_1929_1973_1988_1954_1860_1834_1934_1935_1993_3003_1968_1971_2640_0.8417_PLA2	84	A	B	0.449	0.782	0.003	0.216	0.488778
N.naja_1915_1922_1929_1973_1988_1954_1860_1834_1934_1935_1993_3003_1968_1971_2640_0.8417_PLA2	85	C	B	0.046	0.782	0.003	0.216	0.475556
N.naja_1915_1922_1929_1973_1988_1954_1860_1834_1934_1935_1993_3003_1968_1971_2640_0.8417_PLA2	86	A	B	0.265	0.879	0.01	0.111	0.465222
N.naja_1915_1922_1929_1973_1988_1954_1860_1834_1934_1935_1993_3003_1968_1971_2640_0.8417_PLA2	87	A	B	0.517	0.879	0.01	0.111	0.462333
N.naja_1915_1922_1929_1973_1988_1954_1860_1834_1934_1935_1993_3003_1968_1971_2640_0.8417_PLA2	88	S	B	0.297	0.879	0.01	0.111	0.432889
N.naja_1915_1922_1929_1973_1988_1954_1860_1834_1934_1935_1993_3003_1968_1971_2640_0.8417_PLA2	89	V	B	0.14	0.879	0.01	0.111	0.419
N.naja_1915_1922_1929_1973_1988_1954_1860_1834_1934_1935_1993_3003_1968_1971_2640_0.8417_PLA2	90	C	B	0.065	0.802	0.014	0.185	0.428889
N.naja_1915_1922_1929_1973_1988_1954_1860_1834_1934_1935_1993_3003_1968_1971_2640_0.8417_PLA2	91	D	B	0.509	0.782	0.003	0.216	0.436556
N.naja_1915_1922_1929_1973_1988_1954_1860_1834_1934_1935_1993_3003_1968_1971_2640_0.8417_PLA2	92	C	B	0.051	0.694	0.003	0.303	0.424667
N.naja_1915_1922_1929_1973_1988_1954_1860_1834_1934_1935_1993_3003_1968_1971_2640_0.8417_PLA2	93	D	B	0.173	0.694	0.003	0.303	0.414
N.naja_1915_1922_1929_1973_1988_1954_1860_1834_1934_1935_1993_3003_1968_1971_2640_0.8417_PLA2	94	R	B	0.368	0.97	0.001	0.03	0.418333
N.naja_1915_1922_1929_1973_1988_1954_1860_1834_1934_1935_1993_3003_1968_1971_2640_0.8417_PLA2	95	L	B	0.299	0.97	0.001	0.03	0.404667
N.naja_1915_1922_1929_1973_1988_1954_1860_1834_1934_1935_1993_3003_1968_1971_2640_0.8417_PLA2	96	A	B	0.032	0.97	0.001	0.03	0.389444
N.naja_1915_1922_1929_1973_1988_1954_1860_1834_1934_1935_1993_3003_1968_1971_2640_0.8417_PLA2	97	A	B	0.041	0.97	0.001	0.03	0.408222
N.naja_1915_1922_1929_1973_1988_1954_1860_1834_1934_1935_1993_3003_1968_1971_2640_0.8417_PLA2	98	I	B	0.297	0.97	0.001	0.03	0.418889
N.naja_1915_1922_1929_1973_1988_1954_1860_1834_1934_1935_1993_3003_1968_1971_2640_0.8417_PLA2	99	C	B	0.024	0.923	0.002	0.076	0.419778
N.naja_1915_1922_1929_1973_1988_1954_1860_1834_1934_1935_1993_3003_1968_1971_2640_0.8417_PLA2	100	F	B	0.056	0.782	0.003	0.216	0.423444
N.naja_1915_1922_1929_1973_1988_1954_1860_1834_1934_1935_1993_3003_1968_1971_2640_0.8417_PLA2	101	A	B	0.326	0.6	0.003	0.397	0.442444
N.naja_1915_1922_1929_1973_1988_1954_1860_1834_1934_1935_1993_3003_1968_1971_2640_0.8417_PLA2	102	G	B	0.588	0.321	0.003	0.675	0.465111
N.naja_1915_1922_1929_1973_1988_1954_1860_1834_1934_1935_1993_3003_1968_1971_2640_0.8417_PLA2	103	A	B	0.168	0.053	0.005	0.942	0.490444
N.naja_1915_1922_1929_1973_1988_1954_1860_1834_1934_1935_1993_3003_1968_1971_2640_0.8417_PLA2	104	P	E	0.563	0.058	0.017	0.925	0.529333
N.naja_1915_1922_1929_1973_1988_1954_1860_1834_1934_1935_1993_3003_1968_1971_2640_0.8417_PLA2	105	Y	E	0.225	0.053	0.043	0.903	0.562222
N.naja_1915_1922_1929_1973_1988_1954_1860_1834_1934_1935_1993_3003_1968_1971_2640_0.8417_PLA2	106	N	E	0.205	0.053	0.043	0.903	0.583778
N.naja_1915_1922_1929_1973_1988_1954_1860_1834_1934_1935_1993_3003_1968_1971_2640_0.8417_PLA2	107	D	E	0.54	0.354	0.048	0.598	0.597667
N.naja_1915_1922_1929_1973_1988_1954_1860_1834_1934_1935_1993_3003_1968_1971_2640_0.8417_PLA2	108	N	E	0.619	0.339	0.016	0.645	0.602444
N.naja_1915_1922_1929_1973_1988_1954_1860_1834_1934_1935_1993_3003_1968_1971_2640_0.8417_PLA2	109	N	E	0.334	0.339	0.016	0.645	0.605444
N.naja_1915_1922_1929_1973_1988_1954_1860_1834_1934_1935_1993_3003_1968_1971_2640_0.8417_PLA2	110	Y	E	0.287	0.257	0.016	0.727	0.620333
N.naja_1915_1922_1929_1973_1988_1954_1860_1834_1934_1935_1993_3003_1968_1971_2640_0.8417_PLA2	111	N	E	0.502	0.113	0.043	0.844	0.633667
N.naja_1915_1922_1929_1973_1988_1954_1860_1834_1934_1935_1993_3003_1968_1971_2640_0.8417_PLA2	112	I	E	0.214	0.053	0.043	0.903	0.62
N.naja_1915_1922_1929_1973_1988_1954_1860_1834_1934_1935_1993_3003_1968_1971_2640_0.8417_PLA2	113	D	E	0.415	0.018	0.019	0.964	0.609667
N.naja_1915_1922_1929_1973_1988_1954_1860_1834_1934_1935_1993_3003_1968_1971_2640_0.8417_PLA2	114	L	E	0.519	0.018	0.019	0.964	0.584778
N.naja_1915_1922_1929_1973_1988_1954_1860_1834_1934_1935_1993_3003_1968_1971_2640_0.8417_PLA2	115	K	E	0.546	0.018	0.019	0.964	0.578667
N.naja_1915_1922_1929_1973_1988_1954_1860_1834_1934_1935_1993_3003_1968_1971_2640_0.8417_PLA2	116	A	E	0.534	0.018	0.019	0.964	0.504
N.naja_1915_1922_1929_1973_1988_1954_1860_1834_1934_1935_1993_3003_1968_1971_2640_0.8417_PLA2	117	R	B	0.487	0.018	0.019	0.964	0.442
N.naja_1915_1922_1929_1973_1988_1954_1860_1834_1934_1935_1993_3003_1968_1971_2640_0.8417_PLA2	118	C	B	0.088	0.018	0.019	0.964	0.378333
N.naja_1915_1922_1929_1973_1988_1954_1860_1834_1934_1935_1993_3003_1968_1971_2640_0.8417_PLA2	119	Q	B	0.717	0.003	0.003	0.994	0.308778
N.naja_1932_1965_1974_1874_1933_0.3783_PLA2	1	N	B	0.732	0.003	0.003	0.994	0.251333
N.naja_1932_1965_1974_1874_1933_0.3783_PLA2	2	L	B	0.271	0.802	0.014	0.185	0.316556
N.naja_1932_1965_1974_1874_1933_0.3783_PLA2	3	Y	B	0.285	0.879	0.01	0.111	0.368667
N.naja_1932_1965_1974_1874_1933_0.3783_PLA2	4	Q	B	0.342	0.879	0.01	0.111	0.404889
N.naja_1932_1965_1974_1874_1933_0.3783_PLA2	5	F	B	0.062	0.938	0.007	0.055	0.442111
N.naja_1932_1965_1974_1874_1933_0.3783_PLA2	6	K	B	0.256	0.938	0.007	0.055	0.468444
N.naja_1932_1965_1974_1874_1933_0.3783_PLA2	7	N	B	0.418	0.938	0.007	0.055	0.468444
N.naja_1932_1965_1974_1874_1933_0.3783_PLA2	8	M	B	0.064	0.975	0.003	0.022	0.461333
N.naja_1932_1965_1974_1874_1933_0.3783_PLA2	9	I	B	0.035	0.938	0.007	0.055	0.443556
N.naja_1932_1965_1974_1874_1933_0.3783_PLA2	10	K	B	0.328	0.938	0.007	0.055	0.465778
N.naja_1932_1965_1974_1874_1933_0.3783_PLA2	11	C	B	0.2	0.879	0.01	0.111	0.459667
N.naja_1932_1965_1974_1874_1933_0.3783_PLA2	12	T	B	0.147	0.802	0.014	0.185	0.472556
N.naja_1932_1965_1974_1874_1933_0.3783_PLA2	13	V	B	0.115	0.43	0.016	0.555	0.496111
N.naja_1932_1965_1974_1874_1933_0.3783_PLA2	14	P	E	0.457	0.058	0.017	0.925	0.507667
N.naja_1932_1965_1974_1874_1933_0.3783_PLA2	15	S	E	0.449	0.018	0.019	0.964	0.508111
N.naja_1932_1965_1974_1874_1933_0.3783_PLA2	16	R	E	0.317	0.018	0.019	0.964	0.510889
N.naja_1932_1965_1974_1874_1933_0.3783_PLA2	17	S	E	0.083	0.058	0.017	0.925	0.512333
N.naja_1932_1965_1974_1874_1933_0.3783_PLA2	18	W	E	0.089	0.339	0.016	0.645	0.533111
N.naja_1932_1965_1974_1874_1933_0.3783_PLA2	19	W	E	0.245	0.354	0.048	0.598	0.524889
N.naja_1932_1965_1974_1874_1933_0.3783_PLA2	20	D	E	0.253	0.386	0.097	0.517	0.520444
N.naja_1932_1965_1974_1874_1933_0.3783_PLA2	21	F	E	0.066	0.386	0.097	0.517	0.506778
N.naja_1932_1965_1974_1874_1933_0.3783_PLA2	22	A	B	0.301	0.386	0.097	0.517	0.488889
N.naja_1932_1965_1974_1874_1933_0.3783_PLA2	23	D	B	0.396	0.191	0.086	0.723	0.493111
N.naja_1932_1965_1974_1874_1933_0.3783_PLA2	24	Y	B	0.056	0.052	0.084	0.864	0.474444
N.naja_1932_1965_1974_1874_1933_0.3783_PLA2	25	G	B	0.047	0.019	0.141	0.84	0.463222
N.naja_1932_1965_1974_1874_1933_0.3783_PLA2	26	C	B	0.027	0.022	0.359	0.619	0.471889
N.naja_1932_1965_1974_1874_1933_0.3783_PLA2	27	Y	B	0.08	0.021	0.451	0.528	0.470111
N.naja_1932_1965_1974_1874_1933_0.3783_PLA2	28	C	B	0.021	0.021	0.451	0.528	0.468222
N.naja_1932_1965_1974_1874_1933_0.3783_PLA2	29	G	B	0.074	0.021	0.279	0.699	0.489222
N.naja_1932_1965_1974_1874_1933_0.3783_PLA2	30	R	E	0.321	0.018	0.088	0.893	0.513222
N.naja_1932_1965_1974_1874_1933_0.3783_PLA2	31	G	E	0.273	0.005	0.045	0.951	0.545556
N.naja_1932_1965_1974_1874_1933_0.3783_PLA2	32	G	E	0.248	0.005	0.045	0.951	0.560333
N.naja_1932_1965_1974_1874_1933_0.3783_PLA2	33	S	E	0.574	0.018	0.047	0.935	0.575333
N.naja_1932_1965_1974_1874_1933_0.3783_PLA2	34	G	E	0.4	0.018	0.047	0.935	0.606
N.naja_1932_1965_1974_1874_1933_0.3783_PLA2	35	T	E	0.441	0.005	0.015	0.979	0.618
N.naja_1932_1965_1974_1874_1933_0.3783_PLA2	36	P	E	0.311	0.018	0.047	0.935	0.617556
N.naja_1932_1965_1974_1874_1933_0.3783_PLA2	37	V	E	0.447	0.053	0.043	0.903	0.624667
N.naja_1932_1965_1974_1874_1933_0.3783_PLA2	38	D	E	0.502	0.053	0.043	0.903	0.613889
N.naja_1932_1965_1974_1874_1933_0.3783_PLA2	39	D	E	0.54	0.053	0.043	0.903	0.588111
N.naja_1932_1965_1974_1874_1933_0.3783_PLA2	40	L	E	0.321	0.113	0.087	0.8	0.567889
N.naja_1932_1965_1974_1874_1933_0.3783_PLA2	41	D	E	0.333	0.191	0.086	0.723	0.561667
N.naja_1932_1965_1974_1874_1933_0.3783_PLA2	42	R	E	0.34	0.278	0.093	0.628	0.562889
N.naja_1932_1965_1974_1874_1933_0.3783_PLA2	43	C	E	0.041	0.278	0.093	0.628	0.546333
N.naja_1932_1965_1974_1874_1933_0.3783_PLA2	44	C	E	0.064	0.307	0.165	0.527	0.530444
N.naja_1932_1965_1974_1874_1933_0.3783_PLA2	45	Q	E	0.401	0.199	0.152	0.649	0.527
N.naja_1932_1965_1974_1874_1933_0.3783_PLA2	46	V	E	0.395	0.113	0.043	0.844	0.504778
N.naja_1932_1965_1974_1874_1933_0.3783_PLA2	47	H	B	0.193	0.058	0.017	0.925	0.492556
N.naja_1932_1965_1974_1874_1933_0.3783_PLA2	48	D	B	0.571	0.058	0.017	0.925	0.496
N.naja_1932_1965_1974_1874_1933_0.3783_PLA2	49	N	B	0.231	0.339	0.016	0.645	0.490556
N.naja_1932_1965_1974_1874_1933_0.3783_PLA2	50	C	B	0.04	0.622	0.015	0.363	0.469889
N.naja_1932_1965_1974_1874_1933_0.3783_PLA2	51	Y	B	0.11	0.879	0.01	0.111	0.473889
N.naja_1932_1965_1974_1874_1933_0.3783_PLA2	52	N	B	0.536	0.858	0.002	0.139	0.467556
N.naja_1932_1965_1974_1874_1933_0.3783_PLA2	53	E	B	0.385	0.879	0.01	0.111	0.469
N.naja_1932_1965_1974_1874_1933_0.3783_PLA2	54	A	B	0.048	0.858	0.002	0.139	0.468444
N.naja_1932_1965_1974_1874_1933_0.3783_PLA2	55	E	B	0.501	0.802	0.014	0.185	0.489778
N.naja_1932_1965_1974_1874_1933_0.3783_PLA2	56	K	B	0.743	0.622	0.015	0.363	0.490222
N.naja_1932_1965_1974_1874_1933_0.3783_PLA2	57	I	E	0.26	0.181	0.016	0.803	0.505556
N.naja_1932_1965_1974_1874_1933_0.3783_PLA2	58	S	E	0.648	0.016	0.005	0.979	0.519333
N.naja_1932_1965_1974_1874_1933_0.3783_PLA2	59	K	E	0.537	0.018	0.019	0.964	0.539778
N.naja_1932_1965_1974_1874_1933_0.3783_PLA2	60	C	E	0.062	0.018	0.047	0.935	0.536778
N.naja_1932_1965_1974_1874_1933_0.3783_PLA2	61	W	E	0.317	0.019	0.141	0.84	0.549778
N.naja_1932_1965_1974_1874_1933_0.3783_PLA2	62	P	E	0.359	0.005	0.262	0.733	0.546
N.naja_1932_1965_1974_1874_1933_0.3783_PLA2	63	F	E	0.324	0.004	0.42	0.576	0.543222
N.naja_1932_1965_1974_1874_1933_0.3783_PLA2	64	F	E	0.223	0.004	0.514	0.481	0.531444
N.naja_1932_1965_1974_1874_1933_0.3783_PLA2	65	K	E	0.412	0.004	0.42	0.576	0.526
N.naja_1932_1965_1974_1874_1933_0.3783_PLA2	66	T	B	0.416	0.004	0.514	0.481	0.498667
N.naja_1932_1965_1974_1874_1933_0.3783_PLA2	67	Y	B	0.09	0.004	0.616	0.381	0.481
N.naja_1932_1965_1974_1874_1933_0.3783_PLA2	68	S	B	0.428	0.002	0.816	0.182	0.469667
N.naja_1932_1965_1974_1874_1933_0.3783_PLA2	69	Y	B	0.091	0.001	0.9	0.099	0.461667
N.naja_1932_1965_1974_1874_1933_0.3783_PLA2	70	K	B	0.42	0.011	0.918	0.071	0.453556
N.naja_1932_1965_1974_1874_1933_0.3783_PLA2	71	C	B	0.132	0.001	0.9	0.099	0.449333
N.naja_1932_1965_1974_1874_1933_0.3783_PLA2	72	S	B	0.573	0.003	0.718	0.279	0.439444
N.naja_1932_1965_1974_1874_1933_0.3783_PLA2	73	Q	B	0.714	0.005	0.045	0.951	0.434
N.naja_1932_1965_1974_1874_1933_0.3783_PLA2	74	G	B	0.513	0.005	0.015	0.979	0.418556
N.naja_1932_1965_1974_1874_1933_0.3783_PLA2	75	T	B	0.521	0.004	0.514	0.481	0.436222
N.naja_1932_1965_1974_1874_1933_0.3783_PLA2	76	L	B	0.064	0.002	0.816	0.182	0.455778
N.naja_1932_1965_1974_1874_1933_0.3783_PLA2	77	T	B	0.356	0.001	0.9	0.099	0.467889
N.naja_1932_1965_1974_1874_1933_0.3783_PLA2	78	C	B	0.034	0.001	0.9	0.099	0.473667
N.naja_1932_1965_1974_1874_1933_0.3783_PLA2	79	K	B	0.459	0.005	0.336	0.66	0.484556
N.naja_1932_1965_1974_1874_1933_0.3783_PLA2	80	G	B	0.642	0.005	0.045	0.951	0.493889
N.naja_1932_1965_1974_1874_1933_0.3783_PLA2	81	G	B	0.635	0.003	0.003	0.994	0.499111
N.naja_1932_1965_1974_1874_1933_0.3783_PLA2	82	N	E	0.659	0.053	0.005	0.942	0.501889
N.naja_1932_1965_1974_1874_1933_0.3783_PLA2	83	N	E	0.54	0.176	0.004	0.82	0.517333
N.naja_1932_1965_1974_1874_1933_0.3783_PLA2	84	A	E	0.444	0.782	0.003	0.216	0.502111
N.naja_1932_1965_1974_1874_1933_0.3783_PLA2	85	C	B	0.041	0.858	0.002	0.139	0.481111
N.naja_1932_1965_1974_1874_1933_0.3783_PLA2	86	A	B	0.228	0.938	0.007	0.055	0.465444
N.naja_1932_1965_1974_1874_1933_0.3783_PLA2	87	A	B	0.504	0.938	0.007	0.055	0.463
N.naja_1932_1965_1974_1874_1933_0.3783_PLA2	88	S	B	0.265	0.923	0.002	0.076	0.427
N.naja_1932_1965_1974_1874_1933_0.3783_PLA2	89	V	B	0.11	0.923	0.002	0.076	0.413889
N.naja_1932_1965_1974_1874_1933_0.3783_PLA2	90	C	B	0.069	0.923	0.002	0.076	0.421778
N.naja_1932_1965_1974_1874_1933_0.3783_PLA2	91	D	B	0.471	0.923	0.002	0.076	0.426778
N.naja_1932_1965_1974_1874_1933_0.3783_PLA2	92	C	B	0.037	0.923	0.002	0.076	0.415556
N.naja_1932_1965_1974_1874_1933_0.3783_PLA2	93	D	B	0.119	0.923	0.002	0.076	0.404778
N.naja_1932_1965_1974_1874_1933_0.3783_PLA2	94	R	B	0.364	0.988	0	0.012	0.413444
N.naja_1932_1965_1974_1874_1933_0.3783_PLA2	95	L	B	0.216	0.988	0	0.012	0.402778
N.naja_1932_1965_1974_1874_1933_0.3783_PLA2	96	A	B	0.027	0.988	0	0.012	0.386111
N.naja_1932_1965_1974_1874_1933_0.3783_PLA2	97	A	B	0.038	0.988	0	0.012	0.405444
[truncated: 17,754 more rows]
[truncated: 91 more columns]

## Sheet: GR7 Bepipred raw data
Entry	Position	AminoAcid	Exposed/Buried	RelativeSurfaceAccessilibity	HelixProbability	SheetProbability	CoilProbability	EpitopeProbability
GR7_N.nigriollis.Togo_T116_R_0.697_L_915_3FTX	1	R	E	0.714	0.003	0.003	0.994	0.282111
GR7_N.nigriollis.Togo_T116_R_0.697_L_915_3FTX	2	Q	E	0.527	0.018	0.088	0.893	0.351444
GR7_N.nigriollis.Togo_T116_R_0.697_L_915_3FTX	3	C	B	0.154	0.056	0.142	0.802	0.418333
GR7_N.nigriollis.Togo_T116_R_0.697_L_915_3FTX	4	T	E	0.458	0.056	0.142	0.802	0.482556
GR7_N.nigriollis.Togo_T116_R_0.697_L_915_3FTX	5	Q	E	0.568	0.056	0.142	0.802	0.546333
GR7_N.nigriollis.Togo_T116_R_0.697_L_915_3FTX	6	Q	E	0.561	0.056	0.142	0.802	0.556444
GR7_N.nigriollis.Togo_T116_R_0.697_L_915_3FTX	7	K	B	0.269	0.018	0.088	0.893	0.564333
GR7_N.nigriollis.Togo_T116_R_0.697_L_915_3FTX	8	P	E	0.316	0.018	0.047	0.935	0.578111
GR7_N.nigriollis.Togo_T116_R_0.697_L_915_3FTX	9	P	B	0.217	0.056	0.142	0.802	0.582222
GR7_N.nigriollis.Togo_T116_R_0.697_L_915_3FTX	10	F	B	0.204	0.021	0.279	0.699	0.560333
GR7_N.nigriollis.Togo_T116_R_0.697_L_915_3FTX	11	Y	E	0.358	0.022	0.552	0.426	0.551778
GR7_N.nigriollis.Togo_T116_R_0.697_L_915_3FTX	12	M	E	0.325	0.023	0.655	0.322	0.548556
GR7_N.nigriollis.Togo_T116_R_0.697_L_915_3FTX	13	N	E	0.261	0.021	0.451	0.528	0.536111
GR7_N.nigriollis.Togo_T116_R_0.697_L_915_3FTX	14	C	B	0.044	0.019	0.141	0.84	0.527778
GR7_N.nigriollis.Togo_T116_R_0.697_L_915_3FTX	15	P	E	0.402	0.184	0.043	0.773	0.514333
GR7_N.nigriollis.Togo_T116_R_0.697_L_915_3FTX	16	E	E	0.484	0.257	0.016	0.727	0.508222
GR7_N.nigriollis.Togo_T116_R_0.697_L_915_3FTX	17	G	B	0.278	0.321	0.003	0.675	0.492778
GR7_N.nigriollis.Togo_T116_R_0.697_L_915_3FTX	18	M	B	0.247	0.339	0.016	0.645	0.475111
GR7_N.nigriollis.Togo_T116_R_0.697_L_915_3FTX	19	N	E	0.391	0.455	0.046	0.498	0.472222
GR7_N.nigriollis.Togo_T116_R_0.697_L_915_3FTX	20	V	B	0.08	0.538	0.173	0.289	0.453778
GR7_N.nigriollis.Togo_T116_R_0.697_L_915_3FTX	21	C	B	0.027	0.578	0.229	0.194	0.430111
GR7_N.nigriollis.Togo_T116_R_0.697_L_915_3FTX	22	Y	B	0.091	0.578	0.229	0.194	0.426
GR7_N.nigriollis.Togo_T116_R_0.697_L_915_3FTX	23	T	B	0.202	0.578	0.229	0.194	0.417222
GR7_N.nigriollis.Togo_T116_R_0.697_L_915_3FTX	24	M	B	0.195	0.538	0.173	0.289	0.423
GR7_N.nigriollis.Togo_T116_R_0.697_L_915_3FTX	25	F	B	0.1	0.578	0.229	0.194	0.411333
GR7_N.nigriollis.Togo_T116_R_0.697_L_915_3FTX	26	V	B	0.137	0.478	0.309	0.214	0.425111
GR7_N.nigriollis.Togo_T116_R_0.697_L_915_3FTX	27	F	B	0.233	0.352	0.332	0.316	0.449667
GR7_N.nigriollis.Togo_T116_R_0.697_L_915_3FTX	28	E	E	0.254	0.231	0.33	0.439	0.474333
GR7_N.nigriollis.Togo_T116_R_0.697_L_915_3FTX	29	S	B	0.098	0.113	0.087	0.8	0.496889
GR7_N.nigriollis.Togo_T116_R_0.697_L_915_3FTX	30	P	E	0.263	0.053	0.043	0.903	0.522444
GR7_N.nigriollis.Togo_T116_R_0.697_L_915_3FTX	31	F	E	0.46	0.018	0.019	0.964	0.526
GR7_N.nigriollis.Togo_T116_R_0.697_L_915_3FTX	32	K	E	0.545	0.018	0.088	0.893	0.544556
GR7_N.nigriollis.Togo_T116_R_0.697_L_915_3FTX	33	F	B	0.191	0.018	0.088	0.893	0.544556
GR7_N.nigriollis.Togo_T116_R_0.697_L_915_3FTX	34	Y	E	0.491	0.018	0.088	0.893	0.549111
GR7_N.nigriollis.Togo_T116_R_0.697_L_915_3FTX	35	T	B	0.137	0.019	0.141	0.84	0.535556
GR7_N.nigriollis.Togo_T116_R_0.697_L_915_3FTX	36	K	E	0.43	0.056	0.142	0.802	0.517111
GR7_N.nigriollis.Togo_T116_R_0.697_L_915_3FTX	37	R	B	0.257	0.019	0.141	0.84	0.501333
GR7_N.nigriollis.Togo_T116_R_0.697_L_915_3FTX	38	G	B	0.085	0.064	0.216	0.721	0.489333
GR7_N.nigriollis.Togo_T116_R_0.697_L_915_3FTX	39	C	B	0.035	0.069	0.386	0.545	0.471444
GR7_N.nigriollis.Togo_T116_R_0.697_L_915_3FTX	40	A	B	0.177	0.074	0.484	0.442	0.477444
GR7_N.nigriollis.Togo_T116_R_0.697_L_915_3FTX	41	A	B	0.262	0.021	0.451	0.528	0.476778
GR7_N.nigriollis.Togo_T116_R_0.697_L_915_3FTX	42	T	B	0.234	0.021	0.279	0.699	0.474778
GR7_N.nigriollis.Togo_T116_R_0.697_L_915_3FTX	43	C	B	0.056	0.019	0.141	0.84	0.492
GR7_N.nigriollis.Togo_T116_R_0.697_L_915_3FTX	44	P	B	0.297	0.018	0.047	0.935	0.512778
GR7_N.nigriollis.Togo_T116_R_0.697_L_915_3FTX	45	K	E	0.514	0.018	0.047	0.935	0.528556
GR7_N.nigriollis.Togo_T116_R_0.697_L_915_3FTX	46	S	E	0.381	0.018	0.019	0.964	0.54
GR7_N.nigriollis.Togo_T116_R_0.697_L_915_3FTX	47	R	E	0.608	0.018	0.019	0.964	0.545889
GR7_N.nigriollis.Togo_T116_R_0.697_L_915_3FTX	48	V	E	0.336	0.018	0.088	0.893	0.538222
GR7_N.nigriollis.Togo_T116_R_0.697_L_915_3FTX	49	R	E	0.391	0.005	0.262	0.733	0.532111
GR7_N.nigriollis.Togo_T116_R_0.697_L_915_3FTX	50	A	B	0.167	0.003	0.718	0.279	0.503889
GR7_N.nigriollis.Togo_T116_R_0.697_L_915_3FTX	51	K	E	0.29	0.001	0.9	0.099	0.493667
GR7_N.nigriollis.Togo_T116_R_0.697_L_915_3FTX	52	I	B	0.054	0.001	0.959	0.04	0.485333
GR7_N.nigriollis.Togo_T116_R_0.697_L_915_3FTX	53	E	E	0.35	0.001	0.9	0.099	0.482556
GR7_N.nigriollis.Togo_T116_R_0.697_L_915_3FTX	54	C	B	0.04	0.018	0.846	0.136	0.480333
GR7_N.nigriollis.Togo_T116_R_0.697_L_915_3FTX	55	C	B	0.083	0.004	0.616	0.381	0.484556
GR7_N.nigriollis.Togo_T116_R_0.697_L_915_3FTX	56	E	E	0.58	0.005	0.262	0.733	0.473889
GR7_N.nigriollis.Togo_T116_R_0.697_L_915_3FTX	57	K	E	0.495	0.019	0.141	0.84	0.497444
GR7_N.nigriollis.Togo_T116_R_0.697_L_915_3FTX	58	D	E	0.439	0.019	0.141	0.84	0.446333
GR7_N.nigriollis.Togo_T116_R_0.697_L_915_3FTX	59	R	E	0.558	0.019	0.141	0.84	0.41
GR7_N.nigriollis.Togo_T116_R_0.697_L_915_3FTX	60	C	E	0.258	0.018	0.088	0.893	0.361778
GR7_N.nigriollis.Togo_T116_R_0.697_L_915_3FTX	61	N	E	0.84	0.003	0.003	0.994	0.301778
GR7_N.nigricollis.Tanzania_T1076_R_2.3294_L_328_3FTX	1	R	E	0.729	0.003	0.003	0.994	0.281889
GR7_N.nigricollis.Tanzania_T1076_R_2.3294_L_328_3FTX	2	Q	E	0.522	0.018	0.088	0.893	0.350556
GR7_N.nigricollis.Tanzania_T1076_R_2.3294_L_328_3FTX	3	C	B	0.159	0.018	0.088	0.893	0.420778
GR7_N.nigricollis.Tanzania_T1076_R_2.3294_L_328_3FTX	4	T	E	0.465	0.056	0.142	0.802	0.483111
GR7_N.nigricollis.Tanzania_T1076_R_2.3294_L_328_3FTX	5	Q	E	0.548	0.056	0.142	0.802	0.547
GR7_N.nigricollis.Tanzania_T1076_R_2.3294_L_328_3FTX	6	Q	E	0.606	0.056	0.142	0.802	0.552222
GR7_N.nigricollis.Tanzania_T1076_R_2.3294_L_328_3FTX	7	K	E	0.317	0.018	0.088	0.893	0.559
GR7_N.nigricollis.Tanzania_T1076_R_2.3294_L_328_3FTX	8	P	E	0.334	0.018	0.047	0.935	0.570222
GR7_N.nigricollis.Tanzania_T1076_R_2.3294_L_328_3FTX	9	P	B	0.199	0.02	0.205	0.775	0.574444
GR7_N.nigricollis.Tanzania_T1076_R_2.3294_L_328_3FTX	10	F	B	0.19	0.021	0.451	0.528	0.548889
GR7_N.nigricollis.Tanzania_T1076_R_2.3294_L_328_3FTX	11	Y	E	0.377	0.023	0.655	0.322	0.540111
GR7_N.nigricollis.Tanzania_T1076_R_2.3294_L_328_3FTX	12	M	E	0.293	0.004	0.616	0.381	0.531556
GR7_N.nigricollis.Tanzania_T1076_R_2.3294_L_328_3FTX	13	N	E	0.328	0.004	0.514	0.481	0.521333
GR7_N.nigricollis.Tanzania_T1076_R_2.3294_L_328_3FTX	14	C	B	0.048	0.018	0.088	0.893	0.511111
GR7_N.nigricollis.Tanzania_T1076_R_2.3294_L_328_3FTX	15	P	E	0.437	0.113	0.043	0.844	0.499556
GR7_N.nigricollis.Tanzania_T1076_R_2.3294_L_328_3FTX	16	E	E	0.555	0.181	0.016	0.803	0.491111
GR7_N.nigricollis.Tanzania_T1076_R_2.3294_L_328_3FTX	17	G	E	0.347	0.257	0.016	0.727	0.482
GR7_N.nigricollis.Tanzania_T1076_R_2.3294_L_328_3FTX	18	M	E	0.303	0.257	0.016	0.727	0.469
GR7_N.nigricollis.Tanzania_T1076_R_2.3294_L_328_3FTX	19	N	E	0.364	0.278	0.093	0.628	0.478
GR7_N.nigricollis.Tanzania_T1076_R_2.3294_L_328_3FTX	20	V	B	0.084	0.352	0.332	0.316	0.468667
GR7_N.nigricollis.Tanzania_T1076_R_2.3294_L_328_3FTX	21	C	B	0.03	0.373	0.401	0.226	0.455
GR7_N.nigricollis.Tanzania_T1076_R_2.3294_L_328_3FTX	22	Y	B	0.086	0.391	0.466	0.143	0.455
GR7_N.nigricollis.Tanzania_T1076_R_2.3294_L_328_3FTX	23	T	B	0.174	0.487	0.37	0.144	0.452222
GR7_N.nigricollis.Tanzania_T1076_R_2.3294_L_328_3FTX	24	M	B	0.175	0.478	0.309	0.214	0.462444
GR7_N.nigricollis.Tanzania_T1076_R_2.3294_L_328_3FTX	25	F	B	0.113	0.352	0.332	0.316	0.455778
GR7_N.nigricollis.Tanzania_T1076_R_2.3294_L_328_3FTX	26	V	B	0.138	0.373	0.401	0.226	0.464333
GR7_N.nigricollis.Tanzania_T1076_R_2.3294_L_328_3FTX	27	F	B	0.257	0.268	0.505	0.227	0.486556
GR7_N.nigricollis.Tanzania_T1076_R_2.3294_L_328_3FTX	28	E	E	0.261	0.135	0.317	0.548	0.502667
GR7_N.nigricollis.Tanzania_T1076_R_2.3294_L_328_3FTX	29	S	B	0.131	0.052	0.084	0.864	0.518333
GR7_N.nigricollis.Tanzania_T1076_R_2.3294_L_328_3FTX	30	P	B	0.245	0.018	0.019	0.964	0.536889
GR7_N.nigricollis.Tanzania_T1076_R_2.3294_L_328_3FTX	31	F	E	0.499	0.018	0.019	0.964	0.537444
GR7_N.nigricollis.Tanzania_T1076_R_2.3294_L_328_3FTX	32	K	E	0.587	0.018	0.047	0.935	0.550222
GR7_N.nigricollis.Tanzania_T1076_R_2.3294_L_328_3FTX	33	F	B	0.206	0.018	0.047	0.935	0.547222
GR7_N.nigricollis.Tanzania_T1076_R_2.3294_L_328_3FTX	34	Y	E	0.517	0.018	0.047	0.935	0.551111
GR7_N.nigricollis.Tanzania_T1076_R_2.3294_L_328_3FTX	35	T	B	0.134	0.019	0.141	0.84	0.538556
GR7_N.nigricollis.Tanzania_T1076_R_2.3294_L_328_3FTX	36	K	E	0.389	0.064	0.216	0.721	0.520889
GR7_N.nigricollis.Tanzania_T1076_R_2.3294_L_328_3FTX	37	R	B	0.254	0.056	0.142	0.802	0.510556
GR7_N.nigricollis.Tanzania_T1076_R_2.3294_L_328_3FTX	38	G	B	0.084	0.064	0.216	0.721	0.496556
GR7_N.nigricollis.Tanzania_T1076_R_2.3294_L_328_3FTX	39	C	B	0.035	0.069	0.386	0.545	0.475333
GR7_N.nigricollis.Tanzania_T1076_R_2.3294_L_328_3FTX	40	A	B	0.184	0.074	0.484	0.442	0.480556
GR7_N.nigricollis.Tanzania_T1076_R_2.3294_L_328_3FTX	41	A	B	0.311	0.074	0.484	0.442	0.481889
GR7_N.nigricollis.Tanzania_T1076_R_2.3294_L_328_3FTX	42	T	B	0.237	0.066	0.296	0.638	0.481111
GR7_N.nigricollis.Tanzania_T1076_R_2.3294_L_328_3FTX	43	C	B	0.056	0.019	0.141	0.84	0.496111
GR7_N.nigricollis.Tanzania_T1076_R_2.3294_L_328_3FTX	44	P	E	0.302	0.018	0.047	0.935	0.516333
GR7_N.nigricollis.Tanzania_T1076_R_2.3294_L_328_3FTX	45	K	E	0.521	0.018	0.047	0.935	0.530444
GR7_N.nigricollis.Tanzania_T1076_R_2.3294_L_328_3FTX	46	S	E	0.395	0.018	0.019	0.964	0.535556
GR7_N.nigricollis.Tanzania_T1076_R_2.3294_L_328_3FTX	47	R	E	0.597	0.018	0.019	0.964	0.541
GR7_N.nigricollis.Tanzania_T1076_R_2.3294_L_328_3FTX	48	V	E	0.336	0.018	0.088	0.893	0.534222
GR7_N.nigricollis.Tanzania_T1076_R_2.3294_L_328_3FTX	49	R	E	0.383	0.005	0.262	0.733	0.527778
GR7_N.nigricollis.Tanzania_T1076_R_2.3294_L_328_3FTX	50	A	B	0.156	0.003	0.718	0.279	0.500778
GR7_N.nigricollis.Tanzania_T1076_R_2.3294_L_328_3FTX	51	K	E	0.253	0.001	0.959	0.04	0.491111
GR7_N.nigricollis.Tanzania_T1076_R_2.3294_L_328_3FTX	52	I	B	0.046	0.001	0.959	0.04	0.483333
GR7_N.nigricollis.Tanzania_T1076_R_2.3294_L_328_3FTX	53	E	B	0.258	0.001	0.959	0.04	0.483111
GR7_N.nigricollis.Tanzania_T1076_R_2.3294_L_328_3FTX	54	C	B	0.034	0.002	0.816	0.182	0.484444
GR7_N.nigricollis.Tanzania_T1076_R_2.3294_L_328_3FTX	55	C	B	0.066	0.022	0.552	0.426	0.491444
GR7_N.nigricollis.Tanzania_T1076_R_2.3294_L_328_3FTX	56	E	E	0.551	0.021	0.279	0.699	0.485333
GR7_N.nigricollis.Tanzania_T1076_R_2.3294_L_328_3FTX	57	K	E	0.486	0.018	0.047	0.935	0.518222
GR7_N.nigricollis.Tanzania_T1076_R_2.3294_L_328_3FTX	58	D	E	0.477	0.018	0.088	0.893	0.521333
GR7_N.nigricollis.Tanzania_T1076_R_2.3294_L_328_3FTX	59	R	E	0.517	0.019	0.141	0.84	0.483333
GR7_N.nigricollis.Tanzania_T1076_R_2.3294_L_328_3FTX	60	C	B	0.219	0.018	0.088	0.893	0.434778
GR7_N.nigricollis.Tanzania_T1076_R_2.3294_L_328_3FTX	61	N	E	0.558	0.018	0.047	0.935	0.374667
GR7_N.nigricollis.Tanzania_T1076_R_2.3294_L_328_3FTX	62	S	E	0.877	0.003	0.003	0.994	0.311
GR7_N.nigricollis.Tanzania_T1595_R_1.4595_L_200_3FTX	1	R	E	0.795	0.003	0.003	0.994	0.285667
GR7_N.nigricollis.Tanzania_T1595_R_1.4595_L_200_3FTX	2	Q	E	0.635	0.053	0.043	0.903	0.353
GR7_N.nigricollis.Tanzania_T1595_R_1.4595_L_200_3FTX	3	C	B	0.211	0.113	0.087	0.8	0.421222
GR7_N.nigricollis.Tanzania_T1595_R_1.4595_L_200_3FTX	4	T	E	0.529	0.113	0.087	0.8	0.476111
GR7_N.nigricollis.Tanzania_T1595_R_1.4595_L_200_3FTX	5	Q	E	0.602	0.113	0.087	0.8	0.535778
GR7_N.nigricollis.Tanzania_T1595_R_1.4595_L_200_3FTX	6	Q	E	0.616	0.052	0.084	0.864	0.539222
GR7_N.nigricollis.Tanzania_T1595_R_1.4595_L_200_3FTX	7	K	E	0.571	0.018	0.047	0.935	0.536778
GR7_N.nigricollis.Tanzania_T1595_R_1.4595_L_200_3FTX	8	P	B	0.269	0.018	0.019	0.964	0.540111
GR7_N.nigricollis.Tanzania_T1595_R_1.4595_L_200_3FTX	9	P	E	0.308	0.018	0.088	0.893	0.541444
GR7_N.nigricollis.Tanzania_T1595_R_1.4595_L_200_3FTX	10	F	B	0.161	0.021	0.451	0.528	0.524333
GR7_N.nigricollis.Tanzania_T1595_R_1.4595_L_200_3FTX	11	Y	B	0.259	0.023	0.655	0.322	0.519333
GR7_N.nigricollis.Tanzania_T1595_R_1.4595_L_200_3FTX	12	M	B	0.122	0.004	0.514	0.481	0.517889
GR7_N.nigricollis.Tanzania_T1595_R_1.4595_L_200_3FTX	13	N	E	0.351	0.021	0.279	0.699	0.514556
GR7_N.nigricollis.Tanzania_T1595_R_1.4595_L_200_3FTX	14	C	B	0.052	0.053	0.043	0.903	0.507556
GR7_N.nigricollis.Tanzania_T1595_R_1.4595_L_200_3FTX	15	P	E	0.331	0.339	0.016	0.645	0.507111
GR7_N.nigricollis.Tanzania_T1595_R_1.4595_L_200_3FTX	16	E	E	0.61	0.43	0.016	0.555	0.510111
GR7_N.nigricollis.Tanzania_T1595_R_1.4595_L_200_3FTX	17	G	B	0.232	0.43	0.016	0.555	0.510889
GR7_N.nigricollis.Tanzania_T1595_R_1.4595_L_200_3FTX	18	M	B	0.172	0.43	0.016	0.555	0.519444
GR7_N.nigricollis.Tanzania_T1595_R_1.4595_L_200_3FTX	19	N	E	0.53	0.43	0.016	0.555	0.535778
GR7_N.nigricollis.Tanzania_T1595_R_1.4595_L_200_3FTX	20	N	E	0.377	0.43	0.016	0.555	0.536222
GR7_N.nigricollis.Tanzania_T1595_R_1.4595_L_200_3FTX	21	C	B	0.069	0.455	0.046	0.498	0.544667
GR7_N.nigricollis.Tanzania_T1595_R_1.4595_L_200_3FTX	22	Y	B	0.225	0.502	0.102	0.396	0.557333
GR7_N.nigricollis.Tanzania_T1595_R_1.4595_L_200_3FTX	23	T	E	0.357	0.502	0.102	0.396	0.551667
GR7_N.nigricollis.Tanzania_T1595_R_1.4595_L_200_3FTX	24	K	E	0.491	0.268	0.043	0.689	0.536111
GR7_N.nigricollis.Tanzania_T1595_R_1.4595_L_200_3FTX	25	R	E	0.452	0.113	0.043	0.844	0.531444
GR7_N.nigricollis.Tanzania_T1595_R_1.4595_L_200_3FTX	26	G	B	0.316	0.113	0.087	0.8	0.531778
GR7_N.nigricollis.Tanzania_T1595_R_1.4595_L_200_3FTX	27	C	B	0.076	0.125	0.227	0.648	0.512444
GR7_N.nigricollis.Tanzania_T1595_R_1.4595_L_200_3FTX	28	A	E	0.303	0.135	0.317	0.548	0.514444
GR7_N.nigricollis.Tanzania_T1595_R_1.4595_L_200_3FTX	29	A	B	0.3	0.135	0.317	0.548	0.518222
GR7_N.nigricollis.Tanzania_T1595_R_1.4595_L_200_3FTX	30	T	E	0.389	0.125	0.227	0.648	0.494111
GR7_N.nigricollis.Tanzania_T1595_R_1.4595_L_200_3FTX	31	C	B	0.079	0.113	0.087	0.8	0.492667
GR7_N.nigricollis.Tanzania_T1595_R_1.4595_L_200_3FTX	32	P	E	0.35	0.113	0.043	0.844	0.495444
GR7_N.nigricollis.Tanzania_T1595_R_1.4595_L_200_3FTX	33	K	E	0.543	0.268	0.043	0.689	0.510556
GR7_N.nigricollis.Tanzania_T1595_R_1.4595_L_200_3FTX	34	S	E	0.433	0.455	0.046	0.498	0.510111
GR7_N.nigricollis.Tanzania_T1595_R_1.4595_L_200_3FTX	35	R	E	0.382	0.455	0.046	0.498	0.514333
GR7_N.nigricollis.Tanzania_T1595_R_1.4595_L_200_3FTX	36	V	B	0.12	0.605	0.105	0.29	0.519444
GR7_N.nigricollis.Tanzania_T1595_R_1.4595_L_200_3FTX	37	R	E	0.432	0.578	0.229	0.194	0.51
GR7_N.nigricollis.Tanzania_T1595_R_1.4595_L_200_3FTX	38	A	B	0.208	0.478	0.309	0.214	0.487778
GR7_N.nigricollis.Tanzania_T1595_R_1.4595_L_200_3FTX	39	K	E	0.358	0.373	0.401	0.226	0.487667
GR7_N.nigricollis.Tanzania_T1595_R_1.4595_L_200_3FTX	40	I	B	0.106	0.373	0.401	0.226	0.482778
GR7_N.nigricollis.Tanzania_T1595_R_1.4595_L_200_3FTX	41	E	E	0.541	0.391	0.466	0.143	0.496444
GR7_N.nigricollis.Tanzania_T1595_R_1.4595_L_200_3FTX	42	C	B	0.086	0.373	0.401	0.226	0.500111
GR7_N.nigricollis.Tanzania_T1595_R_1.4595_L_200_3FTX	43	C	B	0.122	0.453	0.248	0.299	0.514556
GR7_N.nigricollis.Tanzania_T1595_R_1.4595_L_200_3FTX	44	E	E	0.55	0.502	0.102	0.396	0.513778
GR7_N.nigricollis.Tanzania_T1595_R_1.4595_L_200_3FTX	45	K	E	0.549	0.455	0.046	0.498	0.53
GR7_N.nigricollis.Tanzania_T1595_R_1.4595_L_200_3FTX	46	D	E	0.517	0.354	0.048	0.598	0.529222
GR7_N.nigricollis.Tanzania_T1595_R_1.4595_L_200_3FTX	47	R	E	0.521	0.268	0.043	0.689	0.484889
GR7_N.nigricollis.Tanzania_T1595_R_1.4595_L_200_3FTX	48	C	E	0.302	0.184	0.043	0.773	0.433889
GR7_N.nigricollis.Tanzania_T1595_R_1.4595_L_200_3FTX	49	N	E	0.712	0.058	0.017	0.925	0.376
GR7_N.nigricollis.Tanzania_T1595_R_1.4595_L_200_3FTX	50	S	E	0.907	0.003	0.003	0.994	0.312556
GR7_N.nigriollis.Togo_T321_R_0.2758_L_448_3FTX	1	R	E	0.723	0.016	0.005	0.979	0.281778
GR7_N.nigriollis.Togo_T321_R_0.2758_L_448_3FTX	2	Q	E	0.604	0.113	0.087	0.8	0.348333
GR7_N.nigriollis.Togo_T321_R_0.2758_L_448_3FTX	3	C	B	0.137	0.113	0.087	0.8	0.416
GR7_N.nigriollis.Togo_T321_R_0.2758_L_448_3FTX	4	T	E	0.375	0.113	0.087	0.8	0.475111
GR7_N.nigriollis.Togo_T321_R_0.2758_L_448_3FTX	5	Q	E	0.56	0.113	0.087	0.8	0.537556
GR7_N.nigriollis.Togo_T321_R_0.2758_L_448_3FTX	6	K	E	0.44	0.113	0.087	0.8	0.535556
GR7_N.nigriollis.Togo_T321_R_0.2758_L_448_3FTX	7	K	B	0.221	0.052	0.084	0.864	0.535333
GR7_N.nigriollis.Togo_T321_R_0.2758_L_448_3FTX	8	P	B	0.241	0.053	0.043	0.903	0.550556
GR7_N.nigriollis.Togo_T321_R_0.2758_L_448_3FTX	9	P	B	0.17	0.113	0.087	0.8	0.554111
GR7_N.nigriollis.Togo_T321_R_0.2758_L_448_3FTX	10	F	B	0.132	0.135	0.317	0.548	0.544222
GR7_N.nigriollis.Togo_T321_R_0.2758_L_448_3FTX	11	Y	B	0.253	0.069	0.386	0.545	0.54
GR7_N.nigriollis.Togo_T321_R_0.2758_L_448_3FTX	12	M	E	0.334	0.069	0.386	0.545	0.533556
GR7_N.nigriollis.Togo_T321_R_0.2758_L_448_3FTX	13	T	B	0.215	0.064	0.216	0.721	0.526444
GR7_N.nigriollis.Togo_T321_R_0.2758_L_448_3FTX	14	C	B	0.043	0.018	0.047	0.935	0.517222
GR7_N.nigriollis.Togo_T321_R_0.2758_L_448_3FTX	15	P	E	0.35	0.339	0.016	0.645	0.514778
GR7_N.nigriollis.Togo_T321_R_0.2758_L_448_3FTX	16	E	E	0.461	0.502	0.002	0.495	0.514333
GR7_N.nigriollis.Togo_T321_R_0.2758_L_448_3FTX	17	G	B	0.122	0.6	0.003	0.397	0.485222
GR7_N.nigriollis.Togo_T321_R_0.2758_L_448_3FTX	18	M	B	0.233	0.694	0.003	0.303	0.475222
GR7_N.nigriollis.Togo_T321_R_0.2758_L_448_3FTX	19	N	E	0.476	0.717	0.014	0.269	0.475222
GR7_N.nigriollis.Togo_T321_R_0.2758_L_448_3FTX	20	I	B	0.117	0.831	0.044	0.125	0.471444
GR7_N.nigriollis.Togo_T321_R_0.2758_L_448_3FTX	21	C	B	0.025	0.831	0.044	0.125	0.459667
GR7_N.nigriollis.Togo_T321_R_0.2758_L_448_3FTX	22	Y	B	0.135	0.831	0.044	0.125	0.478222
GR7_N.nigriollis.Togo_T321_R_0.2758_L_448_3FTX	23	T	E	0.375	0.831	0.044	0.125	0.491778
GR7_N.nigriollis.Togo_T321_R_0.2758_L_448_3FTX	24	M	B	0.139	0.779	0.1	0.12	0.503222
GR7_N.nigriollis.Togo_T321_R_0.2758_L_448_3FTX	25	F	B	0.236	0.605	0.105	0.29	0.505
GR7_N.nigriollis.Togo_T321_R_0.2758_L_448_3FTX	26	E	E	0.302	0.278	0.093	0.628	0.529
GR7_N.nigriollis.Togo_T321_R_0.2758_L_448_3FTX	27	T	E	0.453	0.278	0.093	0.628	0.535111
GR7_N.nigriollis.Togo_T321_R_0.2758_L_448_3FTX	28	R	E	0.45	0.191	0.086	0.723	0.545556
GR7_N.nigriollis.Togo_T321_R_0.2758_L_448_3FTX	29	F	B	0.137	0.113	0.087	0.8	0.539444
GR7_N.nigriollis.Togo_T321_R_0.2758_L_448_3FTX	30	S	E	0.443	0.056	0.142	0.802	0.554667
GR7_N.nigriollis.Togo_T321_R_0.2758_L_448_3FTX	31	F	B	0.095	0.064	0.216	0.721	0.550111
GR7_N.nigriollis.Togo_T321_R_0.2758_L_448_3FTX	32	Y	E	0.318	0.135	0.317	0.548	0.539889
GR7_N.nigriollis.Togo_T321_R_0.2758_L_448_3FTX	33	T	B	0.114	0.135	0.317	0.548	0.518444
GR7_N.nigriollis.Togo_T321_R_0.2758_L_448_3FTX	34	K	E	0.367	0.216	0.235	0.548	0.510778
GR7_N.nigriollis.Togo_T321_R_0.2758_L_448_3FTX	35	R	E	0.327	0.199	0.152	0.649	0.509667
GR7_N.nigriollis.Togo_T321_R_0.2758_L_448_3FTX	36	G	B	0.143	0.199	0.152	0.649	0.505
GR7_N.nigriollis.Togo_T321_R_0.2758_L_448_3FTX	37	C	B	0.046	0.199	0.152	0.649	0.486444
GR7_N.nigriollis.Togo_T321_R_0.2758_L_448_3FTX	38	A	B	0.233	0.231	0.33	0.439	0.490667
GR7_N.nigriollis.Togo_T321_R_0.2758_L_448_3FTX	39	A	E	0.488	0.135	0.317	0.548	0.496556
GR7_N.nigriollis.Togo_T321_R_0.2758_L_448_3FTX	40	T	E	0.275	0.125	0.227	0.648	0.492444
GR7_N.nigriollis.Togo_T321_R_0.2758_L_448_3FTX	41	C	B	0.063	0.052	0.084	0.864	0.492556
GR7_N.nigriollis.Togo_T321_R_0.2758_L_448_3FTX	42	P	E	0.272	0.018	0.047	0.935	0.507333
GR7_N.nigriollis.Togo_T321_R_0.2758_L_448_3FTX	43	K	E	0.602	0.018	0.019	0.964	0.515778
GR7_N.nigriollis.Togo_T321_R_0.2758_L_448_3FTX	44	S	E	0.496	0.018	0.019	0.964	0.511889
GR7_N.nigriollis.Togo_T321_R_0.2758_L_448_3FTX	45	P	E	0.505	0.018	0.047	0.935	0.511
GR7_N.nigriollis.Togo_T321_R_0.2758_L_448_3FTX	46	G	B	0.215	0.019	0.141	0.84	0.504111
GR7_N.nigriollis.Togo_T321_R_0.2758_L_448_3FTX	47	R	E	0.237	0.004	0.42	0.576	0.500444
GR7_N.nigriollis.Togo_T321_R_0.2758_L_448_3FTX	48	G	B	0.08	0.002	0.816	0.182	0.466
GR7_N.nigriollis.Togo_T321_R_0.2758_L_448_3FTX	49	K	E	0.244	0.001	0.9	0.099	0.445667
GR7_N.nigriollis.Togo_T321_R_0.2758_L_448_3FTX	50	V	B	0.057	0.001	0.959	0.04	0.441778
GR7_N.nigriollis.Togo_T321_R_0.2758_L_448_3FTX	51	Q	B	0.072	0.001	0.959	0.04	0.438444
GR7_N.nigriollis.Togo_T321_R_0.2758_L_448_3FTX	52	C	B	0.032	0.001	0.9	0.099	0.443222
GR7_N.nigriollis.Togo_T321_R_0.2758_L_448_3FTX	53	C	B	0.041	0.003	0.718	0.279	0.456222
GR7_N.nigriollis.Togo_T321_R_0.2758_L_448_3FTX	54	D	E	0.412	0.004	0.42	0.576	0.459333
GR7_N.nigriollis.Togo_T321_R_0.2758_L_448_3FTX	55	T	B	0.298	0.018	0.088	0.893	0.485556
GR7_N.nigriollis.Togo_T321_R_0.2758_L_448_3FTX	56	D	E	0.564	0.018	0.088	0.893	0.485889
GR7_N.nigriollis.Togo_T321_R_0.2758_L_448_3FTX	57	R	E	0.506	0.019	0.141	0.84	0.449778
GR7_N.nigriollis.Togo_T321_R_0.2758_L_448_3FTX	58	C	B	0.215	0.019	0.141	0.84	0.408222
GR7_N.nigriollis.Togo_T321_R_0.2758_L_448_3FTX	59	N	E	0.582	0.018	0.047	0.935	0.355444
GR7_N.nigriollis.Togo_T321_R_0.2758_L_448_3FTX	60	S	E	0.887	0.003	0.003	0.994	0.300333
GR7_N.nigricollis.Nigeria_T1190_R_1.2224_L_497_3FTX	1	R	E	0.746	0.003	0.003	0.994	0.286222
GR7_N.nigricollis.Nigeria_T1190_R_1.2224_L_497_3FTX	2	Q	E	0.616	0.052	0.084	0.864	0.350778
GR7_N.nigricollis.Nigeria_T1190_R_1.2224_L_497_3FTX	3	C	B	0.184	0.052	0.084	0.864	0.414111
GR7_N.nigricollis.Nigeria_T1190_R_1.2224_L_497_3FTX	4	T	E	0.538	0.052	0.084	0.864	0.469111
GR7_N.nigricollis.Nigeria_T1190_R_1.2224_L_497_3FTX	5	Q	E	0.576	0.052	0.084	0.864	0.529444
GR7_N.nigricollis.Nigeria_T1190_R_1.2224_L_497_3FTX	6	K	E	0.442	0.053	0.043	0.903	0.523667
GR7_N.nigricollis.Nigeria_T1190_R_1.2224_L_497_3FTX	7	K	B	0.191	0.018	0.047	0.935	0.524889
GR7_N.nigricollis.Nigeria_T1190_R_1.2224_L_497_3FTX	8	P	B	0.232	0.018	0.047	0.935	0.540222
GR7_N.nigricollis.Nigeria_T1190_R_1.2224_L_497_3FTX	9	P	B	0.155	0.056	0.142	0.802	0.545222
GR7_N.nigricollis.Nigeria_T1190_R_1.2224_L_497_3FTX	10	F	B	0.119	0.069	0.386	0.545	0.533333
GR7_N.nigricollis.Nigeria_T1190_R_1.2224_L_497_3FTX	11	Y	B	0.259	0.079	0.592	0.329	0.533222
GR7_N.nigricollis.Nigeria_T1190_R_1.2224_L_497_3FTX	12	M	E	0.334	0.021	0.451	0.528	0.536111
GR7_N.nigricollis.Nigeria_T1190_R_1.2224_L_497_3FTX	13	N	E	0.282	0.064	0.216	0.721	0.537444
GR7_N.nigricollis.Nigeria_T1190_R_1.2224_L_497_3FTX	14	C	B	0.049	0.018	0.047	0.935	0.537111
GR7_N.nigricollis.Nigeria_T1190_R_1.2224_L_497_3FTX	15	P	E	0.38	0.268	0.043	0.689	0.533667
GR7_N.nigricollis.Nigeria_T1190_R_1.2224_L_497_3FTX	16	E	E	0.479	0.43	0.016	0.555	0.529889
GR7_N.nigricollis.Nigeria_T1190_R_1.2224_L_497_3FTX	17	G	B	0.161	0.502	0.002	0.495	0.505111
GR7_N.nigricollis.Nigeria_T1190_R_1.2224_L_497_3FTX	18	M	E	0.293	0.522	0.016	0.462	0.497111
GR7_N.nigricollis.Nigeria_T1190_R_1.2224_L_497_3FTX	19	N	E	0.462	0.561	0.047	0.393	0.501889
GR7_N.nigricollis.Nigeria_T1190_R_1.2224_L_497_3FTX	20	I	B	0.121	0.538	0.173	0.289	0.495222
GR7_N.nigricollis.Nigeria_T1190_R_1.2224_L_497_3FTX	21	C	B	0.034	0.578	0.229	0.194	0.487667
GR7_N.nigricollis.Nigeria_T1190_R_1.2224_L_497_3FTX	22	Y	B	0.162	0.478	0.309	0.214	0.500222
GR7_N.nigricollis.Nigeria_T1190_R_1.2224_L_497_3FTX	23	T	E	0.37	0.478	0.309	0.214	0.509
GR7_N.nigricollis.Nigeria_T1190_R_1.2224_L_497_3FTX	24	M	B	0.124	0.352	0.332	0.316	0.522222
GR7_N.nigricollis.Nigeria_T1190_R_1.2224_L_497_3FTX	25	F	E	0.348	0.216	0.235	0.548	0.534222
GR7_N.nigricollis.Nigeria_T1190_R_1.2224_L_497_3FTX	26	E	E	0.394	0.125	0.227	0.648	0.558667
GR7_N.nigricollis.Nigeria_T1190_R_1.2224_L_497_3FTX	27	T	E	0.427	0.056	0.142	0.802	0.565889
[truncated: 3,047 more rows]

## Sheet: GR7 Bepipred analysis
		Epitope threshold	0.53
[truncated: 3,310 more rows]
[truncated: 35 more columns]

## Sheet: GR10 Bepipred raw data
Entry	Position	AminoAcid	Exposed/Buried	RelativeSurfaceAccessilibity	HelixProbability	SheetProbability	CoilProbability	EpitopeProbability
[truncated: 1,752 more rows]

[truncated: 9 more sheets: GR10 Bepipred analysis, GR15 Bepipred raw data, GR15 Bepipred analysis, GR1 Bepipred raw data, GR1 Bepipred analysis, GR17 Bepipred raw data, GR17 Bepipred analysis, GR13 Bepipred raw, GR13 Bepipred analysis]
